# Supplementary material for: Template-directed in situ grown bimetallic nanoarchitectures with hydroxide active site enriched multi-charge transfer routes for energy storage
Source: Royal Society of Chemistry journal article supplement (doi:10.1039/d4ta03412k), 2024-01-01
Supplement: d4ta03412k1.xlsx [file d4ta03412k1.xlsx]

## Sheet: XRD
CC		CC/Co-MOF		CC/CoNi-MOF@NH-1		CC/CoNi-MOF@NH-2		CC/CoNi-MOF@NH-3		CC/CoNi-MOF@NH-4
5	1345.83	5	275.833	5	533.333	5	295	5	406.667	5	380.833
5.02	1297.5	5.02	256.667	5.02	528.333	5.02	285	5.02	362.5	5.02	387.5
5.04	1319.17	5.04	226.667	5.04	558.333	5.04	309.167	5.04	368.333	5.04	352.5
5.06	1334.17	5.06	228.333	5.06	566.667	5.06	295.833	5.06	353.333	5.06	370.833
5.08	1215.83	5.08	260.833	5.08	548.333	5.08	311.667	5.08	355.833	5.08	370.833
5.1	1330	5.1	270	5.1	576.667	5.1	304.167	5.1	376.667	5.1	365
5.12	1170	5.12	250.833	5.12	580	5.12	302.5	5.12	331.667	5.12	367.5
5.14	1248.33	5.14	262.5	5.14	545.833	5.14	280	5.14	373.333	5.14	365.833
5.16	1257.5	5.16	228.333	5.16	519.167	5.16	301.667	5.16	366.667	5.16	355
5.18	1178.33	5.18	248.333	5.18	529.167	5.18	276.667	5.18	332.5	5.18	353.333
5.2	1164.17	5.2	215	5.2	529.167	5.2	283.333	5.2	358.333	5.2	361.667
5.22	1173.33	5.22	229.167	5.22	500.833	5.22	278.333	5.22	357.5	5.22	331.667
5.24	1200.83	5.24	251.667	5.24	550.833	5.24	294.167	5.24	369.167	5.24	336.667
5.26	1125	5.26	213.333	5.26	550	5.26	281.667	5.26	317.5	5.26	313.333
5.28	1165.83	5.28	240	5.28	515	5.28	285	5.28	300.833	5.28	335
5.3	1091.67	5.3	224.167	5.3	535	5.3	302.5	5.3	312.5	5.3	300
5.32	1140.83	5.32	222.5	5.32	494.167	5.32	290.833	5.32	340.833	5.32	326.667
5.34	1078.33	5.34	250	5.34	516.667	5.34	268.333	5.34	275.833	5.34	302.5
5.36	1108.33	5.36	233.333	5.36	479.167	5.36	285	5.36	291.667	5.36	328.333
5.38	1081.67	5.38	205.833	5.38	485.833	5.38	255.833	5.38	320	5.38	313.333
5.4	1094.17	5.4	219.167	5.4	464.167	5.4	265	5.4	314.167	5.4	326.667
5.42	1026.67	5.42	241.667	5.42	446.667	5.42	228.333	5.42	268.333	5.42	325.833
5.44	1072.5	5.44	214.167	5.44	464.167	5.44	264.167	5.44	303.333	5.44	296.667
5.46	1055	5.46	230	5.46	485.833	5.46	246.667	5.46	320	5.46	286.667
5.48	1065.83	5.48	212.5	5.48	473.333	5.48	238.333	5.48	296.667	5.48	280
5.5	992.5	5.5	234.167	5.5	467.5	5.5	265.833	5.5	282.5	5.5	320
5.52	1010	5.52	211.667	5.52	460.833	5.52	247.5	5.52	281.667	5.52	290
5.54	1010.83	5.54	226.667	5.54	464.167	5.54	272.5	5.54	267.5	5.54	272.5
5.56	964.167	5.56	213.333	5.56	458.333	5.56	243.333	5.56	286.667	5.56	285
5.58	982.5	5.58	218.333	5.58	465	5.58	250	5.58	290.833	5.58	282.5
5.6	946.667	5.6	210	5.6	435.833	5.6	257.5	5.6	299.167	5.6	274.167
5.62	969.167	5.62	228.333	5.62	450	5.62	235	5.62	284.167	5.62	285.833
5.64	918.333	5.64	205.833	5.64	458.333	5.64	251.667	5.64	300	5.64	260.833
5.66	909.167	5.66	199.167	5.66	445.833	5.66	255	5.66	306.667	5.66	279.167
5.68	952.5	5.68	195.833	5.68	459.167	5.68	223.333	5.68	255	5.68	270
5.7	900	5.7	200.833	5.7	451.667	5.7	240	5.7	280.833	5.7	276.667
5.72	871.667	5.72	207.5	5.72	433.333	5.72	222.5	5.72	260.833	5.72	257.5
5.74	910.833	5.74	200.833	5.74	432.5	5.74	241.667	5.74	296.667	5.74	256.667
5.76	896.667	5.76	193.333	5.76	468.333	5.76	211.667	5.76	277.5	5.76	285
5.78	929.167	5.78	210	5.78	397.5	5.78	234.167	5.78	279.167	5.78	266.667
5.8	955	5.8	219.167	5.8	411.667	5.8	214.167	5.8	263.333	5.8	262.5
5.82	870	5.82	190	5.82	415.833	5.82	218.333	5.82	289.167	5.82	273.333
5.84	870.833	5.84	166.667	5.84	437.5	5.84	239.167	5.84	300	5.84	246.667
5.86	878.333	5.86	194.167	5.86	434.167	5.86	226.667	5.86	270	5.86	255
5.88	870.833	5.88	199.167	5.88	425.833	5.88	235.833	5.88	270	5.88	237.5
5.9	818.333	5.9	175.833	5.9	387.5	5.9	225.833	5.9	243.333	5.9	264.167
5.92	808.333	5.92	185.833	5.92	409.167	5.92	225	5.92	250	5.92	271.667
5.94	860.833	5.94	181.667	5.94	405.833	5.94	229.167	5.94	266.667	5.94	265.833
5.96	826.667	5.96	198.333	5.96	398.333	5.96	232.5	5.96	255.833	5.96	268.333
5.98	815	5.98	227.5	5.98	386.667	5.98	240	5.98	240	5.98	253.333
6	800	6	203.333	6	368.333	6	192.5	6	276.667	6	228.333
6.02	814.167	6.02	175.833	6.02	385	6.02	220	6.02	232.5	6.02	252.5
6.04	805.833	6.04	195.833	6.04	410	6.04	195	6.04	257.5	6.04	262.5
6.06	775	6.06	205.833	6.06	403.333	6.06	231.667	6.06	265	6.06	222.5
6.08	790	6.08	169.167	6.08	394.167	6.08	211.667	6.08	245	6.08	249.167
6.1	783.333	6.1	191.667	6.1	404.167	6.1	235	6.1	252.5	6.1	242.5
6.12	793.333	6.12	170.833	6.12	335	6.12	201.667	6.12	236.667	6.12	216.667
6.14	771.667	6.14	192.5	6.14	390.833	6.14	231.667	6.14	225.833	6.14	243.333
6.16	758.333	6.16	200.833	6.16	395	6.16	222.5	6.16	247.5	6.16	252.5
6.18	721.667	6.18	185.833	6.18	382.5	6.18	195	6.18	228.333	6.18	229.167
6.2	697.5	6.2	184.167	6.2	344.167	6.2	202.5	6.2	231.667	6.2	224.167
6.22	752.5	6.22	177.5	6.22	359.167	6.22	212.5	6.22	237.5	6.22	232.5
6.24	752.5	6.24	187.5	6.24	376.667	6.24	195	6.24	227.5	6.24	226.667
6.26	728.333	6.26	184.167	6.26	381.667	6.26	195.833	6.26	225.833	6.26	234.167
6.28	762.5	6.28	200.833	6.28	344.167	6.28	214.167	6.28	223.333	6.28	227.5
6.3	748.333	6.3	179.167	6.3	360.833	6.3	208.333	6.3	234.167	6.3	205.833
6.32	740	6.32	170	6.32	350.833	6.32	216.667	6.32	251.667	6.32	210.833
6.34	685.833	6.34	151.667	6.34	380	6.34	212.5	6.34	217.5	6.34	260
6.36	768.333	6.36	179.167	6.36	368.333	6.36	215.833	6.36	214.167	6.36	207.5
6.38	689.167	6.38	167.5	6.38	340	6.38	193.333	6.38	227.5	6.38	220.833
6.4	709.167	6.4	152.5	6.4	324.167	6.4	226.667	6.4	205.833	6.4	236.667
6.42	671.667	6.42	170.833	6.42	350	6.42	225	6.42	213.333	6.42	238.333
6.44	691.667	6.44	171.667	6.44	345	6.44	205.833	6.44	223.333	6.44	233.333
6.46	669.167	6.46	152.5	6.46	317.5	6.46	212.5	6.46	212.5	6.46	213.333
6.48	627.5	6.48	180.833	6.48	331.667	6.48	180.833	6.48	215.833	6.48	209.167
6.5	669.167	6.5	164.167	6.5	313.333	6.5	195.833	6.5	211.667	6.5	229.167
6.52	670.833	6.52	150	6.52	341.667	6.52	173.333	6.52	223.333	6.52	209.167
6.54	680	6.54	168.333	6.54	334.167	6.54	179.167	6.54	220.833	6.54	225.833
6.56	656.667	6.56	150	6.56	342.5	6.56	189.167	6.56	217.5	6.56	238.333
6.58	657.5	6.58	165	6.58	316.667	6.58	212.5	6.58	216.667	6.58	221.667
6.6	655.833	6.6	163.333	6.6	326.667	6.6	210.833	6.6	188.333	6.6	217.5
6.62	652.5	6.62	159.167	6.62	360.833	6.62	197.5	6.62	220	6.62	245
6.64	605.833	6.64	159.167	6.64	364.167	6.64	187.5	6.64	200.833	6.64	214.167
6.66	652.5	6.66	152.5	6.66	286.667	6.66	195	6.66	196.667	6.66	226.667
6.68	640.833	6.68	168.333	6.68	311.667	6.68	190.833	6.68	183.333	6.68	198.333
6.7	621.667	6.7	165.833	6.7	332.5	6.7	195.833	6.7	208.333	6.7	236.667
6.72	644.167	6.72	175.833	6.72	329.167	6.72	182.5	6.72	204.167	6.72	196.667
6.74	589.167	6.74	137.5	6.74	330	6.74	190.833	6.74	197.5	6.74	205.833
6.76	593.333	6.76	169.167	6.76	324.167	6.76	195.833	6.76	222.5	6.76	193.333
6.78	615	6.78	165.833	6.78	302.5	6.78	185	6.78	190.833	6.78	194.167
6.8	598.333	6.8	150	6.8	317.5	6.8	165	6.8	209.167	6.8	203.333
6.82	576.667	6.82	129.167	6.82	315.833	6.82	198.333	6.82	190.833	6.82	197.5
6.84	566.667	6.84	165.833	6.84	280	6.84	197.5	6.84	221.667	6.84	215.833
6.86	571.667	6.86	170.833	6.86	298.333	6.86	166.667	6.86	219.167	6.86	187.5
6.88	534.167	6.88	167.5	6.88	303.333	6.88	166.667	6.88	204.167	6.88	206.667
6.9	570	6.9	170	6.9	289.167	6.9	178.333	6.9	183.333	6.9	220
6.92	600	6.92	154.167	6.92	291.667	6.92	180.833	6.92	202.5	6.92	207.5
6.94	554.167	6.94	158.333	6.94	305	6.94	192.5	6.94	200	6.94	198.333
6.96	525.833	6.96	140	6.96	285.833	6.96	178.333	6.96	185.833	6.96	185.833
6.98	550	6.98	154.167	6.98	317.5	6.98	169.167	6.98	193.333	6.98	195.833
7	541.667	7	165	7	298.333	7	173.333	7	200	7	177.5
7.02	536.667	7.02	150.833	7.02	298.333	7.02	181.667	7.02	192.5	7.02	191.667
7.04	525.833	7.04	158.333	7.04	291.667	7.04	182.5	7.04	175	7.04	192.5
7.06	531.667	7.06	155	7.06	303.333	7.06	169.167	7.06	190	7.06	202.5
7.08	576.667	7.08	152.5	7.08	314.167	7.08	177.5	7.08	216.667	7.08	202.5
7.1	538.333	7.1	143.333	7.1	281.667	7.1	152.5	7.1	187.5	7.1	190.833
7.12	497.5	7.12	170	7.12	320.833	7.12	186.667	7.12	180.833	7.12	194.167
7.14	571.667	7.14	159.167	7.14	279.167	7.14	141.667	7.14	173.333	7.14	198.333
7.16	532.5	7.16	149.167	7.16	260	7.16	197.5	7.16	193.333	7.16	189.167
7.18	521.667	7.18	164.167	7.18	298.333	7.18	169.167	7.18	176.667	7.18	177.5
7.2	529.167	7.2	140	7.2	288.333	7.2	164.167	7.2	180	7.2	192.5
7.22	463.333	7.22	121.667	7.22	276.667	7.22	154.167	7.22	200	7.22	181.667
7.24	515.833	7.24	143.333	7.24	270	7.24	149.167	7.24	185	7.24	195
7.26	494.167	7.26	138.333	7.26	273.333	7.26	148.333	7.26	176.667	7.26	211.667
7.28	516.667	7.28	145	7.28	260.833	7.28	161.667	7.28	197.5	7.28	180
7.3	494.167	7.3	147.5	7.3	236.667	7.3	159.167	7.3	168.333	7.3	180.833
7.32	479.167	7.32	135.833	7.32	277.5	7.32	166.667	7.32	207.5	7.32	175
7.34	490	7.34	149.167	7.34	240.833	7.34	137.5	7.34	168.333	7.34	199.167
7.36	495	7.36	123.333	7.36	279.167	7.36	144.167	7.36	182.5	7.36	173.333
7.38	459.167	7.38	170	7.38	272.5	7.38	146.667	7.38	175.833	7.38	180
7.4	468.333	7.4	136.667	7.4	267.5	7.4	164.167	7.4	165.833	7.4	192.5
7.42	450	7.42	151.667	7.42	290	7.42	160	7.42	168.333	7.42	175.833
7.44	455	7.44	156.667	7.44	254.167	7.44	165	7.44	189.167	7.44	204.167
7.46	488.333	7.46	129.167	7.46	246.667	7.46	162.5	7.46	197.5	7.46	205
7.48	474.167	7.48	150.833	7.48	260	7.48	130.833	7.48	160	7.48	200.833
7.5	438.333	7.5	152.5	7.5	270	7.5	146.667	7.5	195.833	7.5	174.167
7.52	446.667	7.52	134.167	7.52	253.333	7.52	156.667	7.52	188.333	7.52	181.667
7.54	449.167	7.54	143.333	7.54	277.5	7.54	141.667	7.54	173.333	7.54	191.667
7.56	489.167	7.56	120	7.56	248.333	7.56	155	7.56	162.5	7.56	209.167
7.58	432.5	7.58	138.333	7.58	264.167	7.58	140.833	7.58	153.333	7.58	181.667
7.6	440.833	7.6	139.167	7.6	259.167	7.6	160.833	7.6	175	7.6	174.167
7.62	394.167	7.62	135.833	7.62	237.5	7.62	173.333	7.62	158.333	7.62	189.167
7.64	439.167	7.64	135	7.64	257.5	7.64	145	7.64	163.333	7.64	192.5
7.66	415	7.66	121.667	7.66	252.5	7.66	132.5	7.66	180.833	7.66	179.167
7.68	428.333	7.68	139.167	7.68	236.667	7.68	153.333	7.68	159.167	7.68	186.667
7.7	399.167	7.7	150	7.7	233.333	7.7	131.667	7.7	150.833	7.7	190
7.72	426.667	7.72	129.167	7.72	245	7.72	172.5	7.72	151.667	7.72	152.5
7.74	460	7.74	157.5	7.74	259.167	7.74	165.833	7.74	175.833	7.74	190.833
7.76	420	7.76	146.667	7.76	247.5	7.76	151.667	7.76	188.333	7.76	174.167
7.78	385	7.78	147.5	7.78	252.5	7.78	132.5	7.78	156.667	7.78	177.5
7.8	440	7.8	135	7.8	240.833	7.8	146.667	7.8	166.667	7.8	181.667
7.82	388.333	7.82	118.333	7.82	235.833	7.82	150	7.82	148.333	7.82	198.333
7.84	415	7.84	131.667	7.84	255	7.84	152.5	7.84	134.167	7.84	176.667
7.86	411.667	7.86	132.5	7.86	240.833	7.86	131.667	7.86	169.167	7.86	162.5
7.88	425	7.88	152.5	7.88	240.833	7.88	131.667	7.88	143.333	7.88	169.167
7.9	402.5	7.9	128.333	7.9	259.167	7.9	155.833	7.9	160.833	7.9	160
7.92	393.333	7.92	133.333	7.92	239.167	7.92	138.333	7.92	136.667	7.92	171.667
7.94	438.333	7.94	145.833	7.94	262.5	7.94	150.833	7.94	152.5	7.94	167.5
7.96	396.667	7.96	158.333	7.96	227.5	7.96	158.333	7.96	132.5	7.96	179.167
7.98	389.167	7.98	138.333	7.98	229.167	7.98	130	7.98	144.167	7.98	157.5
8	382.5	8	122.5	8	227.5	8	146.667	8	139.167	8	161.667
8.02	395	8.02	124.167	8.02	242.5	8.02	149.167	8.02	150.833	8.02	185
8.04	352.5	8.04	155.833	8.04	235	8.04	148.333	8.04	165	8.04	174.167
8.06	369.167	8.06	133.333	8.06	231.667	8.06	145.833	8.06	140	8.06	150.833
8.08	383.333	8.08	120	8.08	224.167	8.08	134.167	8.08	180	8.08	170
8.1	370	8.1	130	8.1	245.833	8.1	128.333	8.1	150	8.1	169.167
8.12	382.5	8.12	102.5	8.12	225.833	8.12	136.667	8.12	157.5	8.12	152.5
8.14	390	8.14	124.167	8.14	217.5	8.14	162.5	8.14	156.667	8.14	145
8.16	395.833	8.16	136.667	8.16	230.833	8.16	141.667	8.16	175.833	8.16	174.167
8.18	345	8.18	125	8.18	233.333	8.18	157.5	8.18	152.5	8.18	180
8.2	362.5	8.2	121.667	8.2	254.167	8.2	153.333	8.2	165.833	8.2	144.167
8.22	365.833	8.22	128.333	8.22	226.667	8.22	146.667	8.22	137.5	8.22	171.667
8.24	364.167	8.24	121.667	8.24	234.167	8.24	145	8.24	142.5	8.24	165
8.26	366.667	8.26	111.667	8.26	191.667	8.26	142.5	8.26	145.833	8.26	159.167
8.28	395.833	8.28	135	8.28	209.167	8.28	126.667	8.28	152.5	8.28	173.333
8.3	349.167	8.3	110.833	8.3	237.5	8.3	133.333	8.3	148.333	8.3	171.667
8.32	336.667	8.32	131.667	8.32	223.333	8.32	140.833	8.32	146.667	8.32	165.833
8.34	355.833	8.34	136.667	8.34	256.667	8.34	135	8.34	147.5	8.34	125.833
8.36	365	8.36	105	8.36	225.833	8.36	136.667	8.36	146.667	8.36	159.167
8.38	362.5	8.38	130	8.38	226.667	8.38	139.167	8.38	148.333	8.38	160.833
8.4	345	8.4	115.833	8.4	205.833	8.4	132.5	8.4	134.167	8.4	187.5
8.42	307.5	8.42	115	8.42	222.5	8.42	130	8.42	145.833	8.42	166.667
8.44	360.833	8.44	125	8.44	227.5	8.44	136.667	8.44	133.333	8.44	169.167
8.46	338.333	8.46	108.333	8.46	208.333	8.46	135	8.46	135	8.46	150.833
8.48	364.167	8.48	116.667	8.48	209.167	8.48	136.667	8.48	158.333	8.48	145
8.5	348.333	8.5	107.5	8.5	208.333	8.5	115	8.5	126.667	8.5	152.5
8.52	347.5	8.52	123.333	8.52	218.333	8.52	133.333	8.52	138.333	8.52	166.667
8.54	337.5	8.54	103.333	8.54	212.5	8.54	120.833	8.54	135.833	8.54	152.5
8.56	322.5	8.56	123.333	8.56	225	8.56	123.333	8.56	140	8.56	157.5
8.58	329.167	8.58	125.833	8.58	220	8.58	115.833	8.58	143.333	8.58	153.333
8.6	334.167	8.6	106.667	8.6	216.667	8.6	128.333	8.6	132.5	8.6	147.5
8.62	320.833	8.62	130	8.62	228.333	8.62	132.5	8.62	149.167	8.62	172.5
8.64	329.167	8.64	113.333	8.64	206.667	8.64	134.167	8.64	120.833	8.64	137.5
8.66	310.833	8.66	105.833	8.66	190	8.66	115	8.66	140	8.66	152.5
8.68	280.833	8.68	110	8.68	200.833	8.68	120	8.68	136.667	8.68	155
8.7	289.167	8.7	116.667	8.7	225.833	8.7	124.167	8.7	146.667	8.7	184.167
8.72	315.833	8.72	100.833	8.72	243.333	8.72	124.167	8.72	126.667	8.72	172.5
8.74	321.667	8.74	108.333	8.74	200	8.74	116.667	8.74	141.667	8.74	168.333
8.76	316.667	8.76	111.667	8.76	210	8.76	112.5	8.76	137.5	8.76	159.167
8.78	305	8.78	96.6667	8.78	218.333	8.78	146.667	8.78	135.833	8.78	149.167
8.8	328.333	8.8	129.167	8.8	213.333	8.8	129.167	8.8	121.667	8.8	171.667
8.82	300	8.82	95	8.82	193.333	8.82	125	8.82	145.833	8.82	161.667
8.84	326.667	8.84	117.5	8.84	205	8.84	130	8.84	130.833	8.84	156.667
8.86	333.333	8.86	110	8.86	205.833	8.86	133.333	8.86	134.167	8.86	164.167
8.88	302.5	8.88	105	8.88	200	8.88	125	8.88	140.833	8.88	158.333
8.9	308.333	8.9	109.167	8.9	196.667	8.9	133.333	8.9	134.167	8.9	146.667
8.92	316.667	8.92	120.833	8.92	225	8.92	118.333	8.92	154.167	8.92	155.833
8.94	310.833	8.94	125.833	8.94	189.167	8.94	113.333	8.94	115.833	8.94	167.5
8.96	308.333	8.96	112.5	8.96	175.833	8.96	140	8.96	140	8.96	160.833
8.98	281.667	8.98	137.5	8.98	175	8.98	145.833	8.98	140	8.98	131.667
9	302.5	9	112.5	9	192.5	9	118.333	9	133.333	9	141.667
9.02	289.167	9.02	100	9.02	173.333	9.02	130	9.02	119.167	9.02	128.333
9.04	290.833	9.04	109.167	9.04	210	9.04	115	9.04	145	9.04	135.833
9.06	283.333	9.06	118.333	9.06	196.667	9.06	129.167	9.06	135.833	9.06	151.667
9.08	290	9.08	117.5	9.08	211.667	9.08	125.833	9.08	104.167	9.08	153.333
9.1	293.333	9.1	121.667	9.1	216.667	9.1	141.667	9.1	126.667	9.1	121.667
9.12	302.5	9.12	121.667	9.12	180	9.12	138.333	9.12	135	9.12	147.5
9.14	303.333	9.14	114.167	9.14	181.667	9.14	125.833	9.14	132.5	9.14	155
9.16	300.833	9.16	97.5	9.16	170.833	9.16	130.833	9.16	127.5	9.16	160
9.18	290.833	9.18	102.5	9.18	182.5	9.18	116.667	9.18	144.167	9.18	158.333
9.2	282.5	9.2	95.8333	9.2	196.667	9.2	124.167	9.2	141.667	9.2	160
9.22	283.333	9.22	106.667	9.22	204.167	9.22	118.333	9.22	127.5	9.22	160.833
9.24	300.833	9.24	108.333	9.24	230.833	9.24	122.5	9.24	160	9.24	157.5
9.26	297.5	9.26	109.167	9.26	190.833	9.26	111.667	9.26	147.5	9.26	150.833
9.28	275.833	9.28	109.167	9.28	165.833	9.28	115.833	9.28	145.833	9.28	137.5
9.3	281.667	9.3	97.5	9.3	189.167	9.3	137.5	9.3	134.167	9.3	164.167
9.32	294.167	9.32	115.833	9.32	168.333	9.32	113.333	9.32	141.667	9.32	145.833
9.34	260.833	9.34	99.1667	9.34	182.5	9.34	120.833	9.34	137.5	9.34	154.167
9.36	292.5	9.36	94.1667	9.36	190.833	9.36	123.333	9.36	125.833	9.36	175
9.38	250	9.38	92.5	9.38	195	9.38	128.333	9.38	130.833	9.38	145.833
9.4	264.167	9.4	108.333	9.4	180.833	9.4	107.5	9.4	153.333	9.4	150.833
9.42	260.833	9.42	127.5	9.42	180	9.42	120	9.42	140.833	9.42	143.333
9.44	259.167	9.44	105	9.44	168.333	9.44	106.667	9.44	144.167	9.44	125
9.46	261.667	9.46	90	9.46	200.833	9.46	107.5	9.46	129.167	9.46	148.333
9.48	259.167	9.48	91.6667	9.48	202.5	9.48	107.5	9.48	126.667	9.48	158.333
9.5	261.667	9.5	110.833	9.5	165.833	9.5	121.667	9.5	134.167	9.5	135
9.52	269.167	9.52	108.333	9.52	193.333	9.52	129.167	9.52	145	9.52	151.667
9.54	244.167	9.54	109.167	9.54	173.333	9.54	135	9.54	132.5	9.54	137.5
9.56	277.5	9.56	107.5	9.56	190	9.56	109.167	9.56	122.5	9.56	137.5
9.58	233.333	9.58	104.167	9.58	193.333	9.58	127.5	9.58	142.5	9.58	119.167
9.6	268.333	9.6	101.667	9.6	180.833	9.6	132.5	9.6	146.667	9.6	124.167
9.62	250.833	9.62	95	9.62	163.333	9.62	117.5	9.62	117.5	9.62	129.167
9.64	272.5	9.64	111.667	9.64	173.333	9.64	103.333	9.64	120	9.64	150
9.66	255	9.66	107.5	9.66	172.5	9.66	132.5	9.66	105.833	9.66	160.833
9.68	262.5	9.68	100.833	9.68	178.333	9.68	122.5	9.68	130	9.68	153.333
9.7	241.667	9.7	104.167	9.7	173.333	9.7	133.333	9.7	135.833	9.7	135.833
9.72	260.833	9.72	119.167	9.72	184.167	9.72	137.5	9.72	125.833	9.72	145.833
9.74	256.667	9.74	102.5	9.74	163.333	9.74	118.333	9.74	110	9.74	153.333
9.76	242.5	9.76	95.8333	9.76	200.833	9.76	128.333	9.76	126.667	9.76	145.833
9.78	249.167	9.78	116.667	9.78	176.667	9.78	120.833	9.78	147.5	9.78	132.5
9.8	240.833	9.8	105	9.8	166.667	9.8	123.333	9.8	128.333	9.8	133.333
9.82	280	9.82	110.833	9.82	181.667	9.82	120	9.82	135.833	9.82	135
9.84	256.667	9.84	87.5	9.84	185.833	9.84	140.833	9.84	122.5	9.84	150.833
9.86	223.333	9.86	104.167	9.86	185.833	9.86	132.5	9.86	119.167	9.86	141.667
9.88	228.333	9.88	89.1667	9.88	172.5	9.88	114.167	9.88	130.833	9.88	129.167
9.9	240	9.9	107.5	9.9	183.333	9.9	112.5	9.9	136.667	9.9	155
9.92	232.5	9.92	93.3333	9.92	175	9.92	120	9.92	133.333	9.92	134.167
9.94	258.333	9.94	101.667	9.94	179.167	9.94	110.833	9.94	137.5	9.94	145
9.96	250	9.96	105	9.96	178.333	9.96	125.833	9.96	122.5	9.96	128.333
9.98	248.333	9.98	118.333	9.98	160.833	9.98	147.5	9.98	127.5	9.98	133.333
10	246.667	10	102.5	10	190	10	108.333	10	129.167	10	137.5
10.02	250	10.02	100	10.02	179.167	10.02	135	10.02	135.833	10.02	154.167
10.04	246.667	10.04	90.8333	10.04	187.5	10.04	91.6667	10.04	133.333	10.04	152.5
10.06	252.5	10.06	98.3333	10.06	193.333	10.06	128.333	10.06	127.5	10.06	178.333
10.08	213.333	10.08	118.333	10.08	185	10.08	135.833	10.08	139.167	10.08	155
10.1	216.667	10.1	100.833	10.1	182.5	10.1	116.667	10.1	130	10.1	156.667
10.12	250.833	10.12	92.5	10.12	192.5	10.12	122.5	10.12	135	10.12	146.667
10.14	240.833	10.14	115	10.14	167.5	10.14	125.833	10.14	140	10.14	169.167
10.16	215	10.16	85.8333	10.16	195.833	10.16	125.833	10.16	135.833	10.16	139.167
10.18	227.5	10.18	100.833	10.18	195.833	10.18	123.333	10.18	126.667	10.18	147.5
10.2	234.167	10.2	115	10.2	172.5	10.2	140	10.2	137.5	10.2	154.167
10.22	219.167	10.22	110.833	10.22	176.667	10.22	126.667	10.22	121.667	10.22	153.333
10.24	220	10.24	99.1667	10.24	185.833	10.24	135.833	10.24	144.167	10.24	145
10.26	259.167	10.26	92.5	10.26	166.667	10.26	140	10.26	140.833	10.26	141.667
10.28	214.167	10.28	100.833	10.28	182.5	10.28	130	10.28	120.833	10.28	159.167
10.3	241.667	10.3	99.1667	10.3	174.167	10.3	130	10.3	116.667	10.3	156.667
10.32	232.5	10.32	103.333	10.32	179.167	10.32	119.167	10.32	128.333	10.32	151.667
10.34	204.167	10.34	118.333	10.34	196.667	10.34	125	10.34	133.333	10.34	137.5
10.36	227.5	10.36	119.167	10.36	173.333	10.36	120.833	10.36	133.333	10.36	149.167
10.38	210	10.38	105.833	10.38	180	10.38	138.333	10.38	124.167	10.38	140.833
10.4	230	10.4	115	10.4	181.667	10.4	120	10.4	139.167	10.4	165
10.42	227.5	10.42	113.333	10.42	175	10.42	150	10.42	127.5	10.42	165.833
10.44	205	10.44	121.667	10.44	183.333	10.44	144.167	10.44	138.333	10.44	151.667
10.46	220	10.46	124.167	10.46	177.5	10.46	140	10.46	141.667	10.46	148.333
10.48	226.667	10.48	136.667	10.48	172.5	10.48	143.333	10.48	129.167	10.48	143.333
10.5	236.667	10.5	150	10.5	193.333	10.5	138.333	10.5	123.333	10.5	160
10.52	195.833	10.52	135.833	10.52	167.5	10.52	145.833	10.52	149.167	10.52	158.333
10.54	214.167	10.54	139.167	10.54	205	10.54	155.833	10.54	133.333	10.54	154.167
10.56	224.167	10.56	154.167	10.56	180.833	10.56	145	10.56	119.167	10.56	152.5
10.58	220.833	10.58	148.333	10.58	168.333	10.58	134.167	10.58	117.5	10.58	142.5
10.6	215	10.6	118.333	10.6	185.833	10.6	158.333	10.6	133.333	10.6	155
10.62	195.833	10.62	110	10.62	184.167	10.62	145.833	10.62	162.5	10.62	140
10.64	215.833	10.64	117.5	10.64	197.5	10.64	135	10.64	130	10.64	159.167
10.66	189.167	10.66	115.833	10.66	196.667	10.66	160.833	10.66	140.833	10.66	154.167
10.68	210	10.68	108.333	10.68	184.167	10.68	163.333	10.68	147.5	10.68	164.167
10.7	235.833	10.7	91.6667	10.7	182.5	10.7	153.333	10.7	120	10.7	155
10.72	185.833	10.72	106.667	10.72	170	10.72	145.833	10.72	130.833	10.72	144.167
10.74	196.667	10.74	95.8333	10.74	187.5	10.74	164.167	10.74	115	10.74	166.667
10.76	225	10.76	103.333	10.76	173.333	10.76	140	10.76	154.167	10.76	153.333
10.78	208.333	10.78	90	10.78	200	10.78	150.833	10.78	124.167	10.78	140
10.8	209.167	10.8	90.8333	10.8	184.167	10.8	183.333	10.8	125	10.8	174.167
10.82	208.333	10.82	117.5	10.82	194.167	10.82	183.333	10.82	115	10.82	188.333
10.84	201.667	10.84	105.833	10.84	194.167	10.84	172.5	10.84	130.833	10.84	161.667
10.86	210	10.86	105.833	10.86	192.5	10.86	160	10.86	140	10.86	159.167
10.88	215.833	10.88	131.667	10.88	195	10.88	166.667	10.88	152.5	10.88	160.833
10.9	195	10.9	110	10.9	191.667	10.9	189.167	10.9	152.5	10.9	205.833
10.92	203.333	10.92	118.333	10.92	188.333	10.92	179.167	10.92	122.5	10.92	170.833
10.94	175	10.94	125.833	10.94	220.833	10.94	165.833	10.94	145.833	10.94	178.333
10.96	193.333	10.96	141.667	10.96	188.333	10.96	166.667	10.96	140.833	10.96	180.833
10.98	182.5	10.98	122.5	10.98	194.167	10.98	187.5	10.98	125.833	10.98	165
11	179.167	11	141.667	11	196.667	11	195	11	150	11	165
11.02	197.5	11.02	146.667	11.02	190.833	11.02	175	11.02	135.833	11.02	192.5
11.04	207.5	11.04	165	11.04	194.167	11.04	200	11.04	140	11.04	185
11.06	196.667	11.06	171.667	11.06	217.5	11.06	183.333	11.06	147.5	11.06	168.333
11.08	191.667	11.08	177.5	11.08	202.5	11.08	210.833	11.08	140.833	11.08	214.167
11.1	192.5	11.1	177.5	11.1	193.333	11.1	198.333	11.1	160.833	11.1	170.833
11.12	171.667	11.12	184.167	11.12	225.833	11.12	216.667	11.12	160.833	11.12	170
11.14	202.5	11.14	164.167	11.14	180.833	11.14	192.5	11.14	154.167	11.14	198.333
11.16	195.833	11.16	144.167	11.16	177.5	11.16	184.167	11.16	171.667	11.16	194.167
11.18	220	11.18	125.833	11.18	215.833	11.18	198.333	11.18	156.667	11.18	216.667
11.2	205.833	11.2	118.333	11.2	212.5	11.2	215	11.2	135.833	11.2	203.333
11.22	196.667	11.22	92.5	11.22	210.833	11.22	191.667	11.22	145	11.22	200
11.24	182.5	11.24	107.5	11.24	195.833	11.24	204.167	11.24	145	11.24	190.833
11.26	185	11.26	87.5	11.26	186.667	11.26	190.833	11.26	147.5	11.26	211.667
11.28	185.833	11.28	125.833	11.28	204.167	11.28	195	11.28	160	11.28	192.5
11.3	190.833	11.3	95.8333	11.3	185.833	11.3	205.833	11.3	143.333	11.3	198.333
11.32	210.833	11.32	111.667	11.32	184.167	11.32	188.333	11.32	152.5	11.32	200.833
11.34	170	11.34	100.833	11.34	185	11.34	212.5	11.34	149.167	11.34	201.667
11.36	200	11.36	105	11.36	202.5	11.36	213.333	11.36	148.333	11.36	235
11.38	185	11.38	97.5	11.38	215.833	11.38	198.333	11.38	162.5	11.38	221.667
11.4	188.333	11.4	113.333	11.4	186.667	11.4	229.167	11.4	145	11.4	211.667
11.42	215.833	11.42	100.833	11.42	190	11.42	217.5	11.42	170	11.42	222.5
11.44	197.5	11.44	103.333	11.44	205	11.44	198.333	11.44	180	11.44	226.667
11.46	186.667	11.46	102.5	11.46	181.667	11.46	179.167	11.46	173.333	11.46	226.667
11.48	187.5	11.48	89.1667	11.48	180	11.48	199.167	11.48	168.333	11.48	221.667
11.5	185	11.5	106.667	11.5	201.667	11.5	185	11.5	175.833	11.5	239.167
11.52	196.667	11.52	97.5	11.52	193.333	11.52	197.5	11.52	165.833	11.52	203.333
11.54	170.833	11.54	100	11.54	178.333	11.54	190.833	11.54	157.5	11.54	233.333
11.56	181.667	11.56	133.333	11.56	196.667	11.56	203.333	11.56	173.333	11.56	205.833
11.58	170.833	11.58	115	11.58	202.5	11.58	200	11.58	148.333	11.58	224.167
11.6	190.833	11.6	115	11.6	194.167	11.6	180	11.6	182.5	11.6	205.833
11.62	197.5	11.62	115	11.62	198.333	11.62	206.667	11.62	170	11.62	221.667
11.64	190.833	11.64	115	11.64	174.167	11.64	165.833	11.64	168.333	11.64	230
11.66	175.833	11.66	133.333	11.66	195.833	11.66	168.333	11.66	176.667	11.66	220
11.68	160.833	11.68	138.333	11.68	196.667	11.68	186.667	11.68	175.833	11.68	230
11.7	198.333	11.7	109.167	11.7	192.5	11.7	180	11.7	168.333	11.7	224.167
11.72	183.333	11.72	120.833	11.72	160	11.72	177.5	11.72	157.5	11.72	221.667
11.74	175	11.74	136.667	11.74	178.333	11.74	165.833	11.74	190	11.74	228.333
11.76	200	11.76	114.167	11.76	186.667	11.76	167.5	11.76	148.333	11.76	237.5
11.78	181.667	11.78	102.5	11.78	188.333	11.78	165.833	11.78	165.833	11.78	210
11.8	187.5	11.8	110.833	11.8	183.333	11.8	173.333	11.8	180.833	11.8	226.667
11.82	178.333	11.82	101.667	11.82	175	11.82	160	11.82	141.667	11.82	230
11.84	190	11.84	97.5	11.84	198.333	11.84	145.833	11.84	179.167	11.84	210.833
11.86	197.5	11.86	95.8333	11.86	173.333	11.86	156.667	11.86	163.333	11.86	209.167
11.88	212.5	11.88	110	11.88	178.333	11.88	148.333	11.88	186.667	11.88	219.167
11.9	176.667	11.9	97.5	11.9	187.5	11.9	164.167	11.9	174.167	11.9	219.167
11.92	177.5	11.92	98.3333	11.92	173.333	11.92	138.333	11.92	180	11.92	230
11.94	180	11.94	94.1667	11.94	181.667	11.94	145.833	11.94	160	11.94	206.667
11.96	186.667	11.96	88.3333	11.96	184.167	11.96	150.833	11.96	171.667	11.96	215.833
11.98	181.667	11.98	104.167	11.98	166.667	11.98	149.167	11.98	155	11.98	198.333
12	187.5	12	90	12	160.833	12	133.333	12	175	12	180
12.02	184.167	12.02	75	12.02	146.667	12.02	133.333	12.02	176.667	12.02	205.833
12.04	206.667	12.04	90	12.04	150	12.04	142.5	12.04	151.667	12.04	191.667
12.06	202.5	12.06	105	12.06	161.667	12.06	130	12.06	156.667	12.06	182.5
12.08	185	12.08	89.1667	12.08	189.167	12.08	115.833	12.08	157.5	12.08	191.667
12.1	175	12.1	95.8333	12.1	155	12.1	118.333	12.1	148.333	12.1	203.333
12.12	185	12.12	78.3333	12.12	169.167	12.12	141.667	12.12	148.333	12.12	178.333
12.14	165	12.14	75	12.14	162.5	12.14	119.167	12.14	149.167	12.14	176.667
12.16	172.5	12.16	96.6667	12.16	151.667	12.16	130.833	12.16	155.833	12.16	181.667
12.18	180.833	12.18	99.1667	12.18	160	12.18	131.667	12.18	120.833	12.18	188.333
12.2	152.5	12.2	90.8333	12.2	162.5	12.2	112.5	12.2	140.833	12.2	178.333
12.22	201.667	12.22	93.3333	12.22	145	12.22	125.833	12.22	135	12.22	146.667
12.24	180.833	12.24	75	12.24	158.333	12.24	115.833	12.24	143.333	12.24	179.167
12.26	169.167	12.26	97.5	12.26	164.167	12.26	111.667	12.26	135	12.26	159.167
12.28	154.167	12.28	77.5	12.28	159.167	12.28	106.667	12.28	149.167	12.28	166.667
12.3	155	12.3	75.8333	12.3	150	12.3	118.333	12.3	128.333	12.3	167.5
12.32	166.667	12.32	83.3333	12.32	153.333	12.32	103.333	12.32	138.333	12.32	181.667
12.34	162.5	12.34	96.6667	12.34	160.833	12.34	120.833	12.34	130.833	12.34	165.833
12.36	180	12.36	95.8333	12.36	142.5	12.36	120	12.36	139.167	12.36	151.667
12.38	156.667	12.38	99.1667	12.38	141.667	12.38	114.167	12.38	123.333	12.38	167.5
12.4	151.667	12.4	78.3333	12.4	150.833	12.4	112.5	12.4	142.5	12.4	160
12.42	172.5	12.42	101.667	12.42	147.5	12.42	120	12.42	135	12.42	145
12.44	168.333	12.44	96.6667	12.44	139.167	12.44	117.5	12.44	112.5	12.44	150
12.46	189.167	12.46	81.6667	12.46	145	12.46	108.333	12.46	135.833	12.46	124.167
12.48	148.333	12.48	94.1667	12.48	140	12.48	108.333	12.48	161.667	12.48	151.667
12.5	169.167	12.5	79.1667	12.5	130.833	12.5	95.8333	12.5	135	12.5	145.833
12.52	188.333	12.52	97.5	12.52	161.667	12.52	110	12.52	127.5	12.52	138.333
12.54	153.333	12.54	90	12.54	136.667	12.54	108.333	12.54	108.333	12.54	150
12.56	166.667	12.56	87.5	12.56	140	12.56	96.6667	12.56	121.667	12.56	139.167
12.58	190.833	12.58	92.5	12.58	155	12.58	119.167	12.58	120	12.58	146.667
12.6	155	12.6	85	12.6	154.167	12.6	102.5	12.6	110.833	12.6	134.167
12.62	163.333	12.62	93.3333	12.62	122.5	12.62	108.333	12.62	126.667	12.62	126.667
12.64	184.167	12.64	102.5	12.64	146.667	12.64	101.667	12.64	119.167	12.64	144.167
12.66	185.833	12.66	110.833	12.66	135.833	12.66	92.5	12.66	125	12.66	130
12.68	177.5	12.68	107.5	12.68	163.333	12.68	115	12.68	130.833	12.68	120
12.7	172.5	12.7	125	12.7	141.667	12.7	111.667	12.7	110	12.7	136.667
12.72	185.833	12.72	109.167	12.72	137.5	12.72	94.1667	12.72	110.833	12.72	129.167
12.74	160.833	12.74	139.167	12.74	145.833	12.74	84.1667	12.74	130.833	12.74	132.5
12.76	160.833	12.76	124.167	12.76	149.167	12.76	110	12.76	126.667	12.76	146.667
12.78	164.167	12.78	150	12.78	146.667	12.78	95	12.78	126.667	12.78	117.5
12.8	168.333	12.8	156.667	12.8	155.833	12.8	102.5	12.8	118.333	12.8	126.667
12.82	167.5	12.82	139.167	12.82	135.833	12.82	114.167	12.82	114.167	12.82	120.833
12.84	158.333	12.84	140.833	12.84	131.667	12.84	107.5	12.84	130.833	12.84	137.5
12.86	153.333	12.86	135.833	12.86	139.167	12.86	104.167	12.86	124.167	12.86	130
12.88	164.167	12.88	130	12.88	147.5	12.88	103.333	12.88	118.333	12.88	126.667
12.9	161.667	12.9	155	12.9	134.167	12.9	110	12.9	98.3333	12.9	127.5
12.92	160.833	12.92	125.833	12.92	144.167	12.92	86.6667	12.92	114.167	12.92	118.333
12.94	173.333	12.94	116.667	12.94	146.667	12.94	105.833	12.94	115	12.94	140.833
12.96	179.167	12.96	115.833	12.96	147.5	12.96	100	12.96	115.833	12.96	124.167
12.98	170.833	12.98	125.833	12.98	142.5	12.98	107.5	12.98	113.333	12.98	115.833
13	156.667	13	135	13	148.333	13	91.6667	13	100	13	126.667
13.02	165	13.02	112.5	13.02	160.833	13.02	106.667	13.02	117.5	13.02	150
13.04	165.833	13.04	124.167	13.04	149.167	13.04	91.6667	13.04	121.667	13.04	119.167
13.06	163.333	13.06	116.667	13.06	136.667	13.06	94.1667	13.06	115.833	13.06	113.333
13.08	168.333	13.08	132.5	13.08	142.5	13.08	105.833	13.08	115.833	13.08	122.5
13.1	169.167	13.1	120	13.1	143.333	13.1	126.667	13.1	102.5	13.1	117.5
13.12	171.667	13.12	109.167	13.12	137.5	13.12	90	13.12	119.167	13.12	117.5
13.14	145.833	13.14	130	13.14	143.333	13.14	96.6667	13.14	117.5	13.14	111.667
13.16	153.333	13.16	110.833	13.16	131.667	13.16	98.3333	13.16	125	13.16	119.167
13.18	138.333	13.18	111.667	13.18	140.833	13.18	101.667	13.18	122.5	13.18	132.5
13.2	160	13.2	97.5	13.2	132.5	13.2	89.1667	13.2	102.5	13.2	143.333
13.22	155.833	13.22	100.833	13.22	157.5	13.22	100.833	13.22	117.5	13.22	107.5
13.24	187.5	13.24	94.1667	13.24	141.667	13.24	99.1667	13.24	127.5	13.24	109.167
13.26	160	13.26	110	13.26	128.333	13.26	88.3333	13.26	107.5	13.26	124.167
13.28	156.667	13.28	100	13.28	119.167	13.28	115	13.28	106.667	13.28	135.833
13.3	150.833	13.3	86.6667	13.3	141.667	13.3	83.3333	13.3	118.333	13.3	111.667
13.32	156.667	13.32	95	13.32	110.833	13.32	96.6667	13.32	119.167	13.32	105
13.34	159.167	13.34	107.5	13.34	165.833	13.34	88.3333	13.34	118.333	13.34	100.833
13.36	169.167	13.36	95	13.36	154.167	13.36	103.333	13.36	118.333	13.36	116.667
13.38	168.333	13.38	106.667	13.38	133.333	13.38	88.3333	13.38	110	13.38	137.5
13.4	157.5	13.4	115	13.4	135.833	13.4	91.6667	13.4	110	13.4	132.5
13.42	186.667	13.42	116.667	13.42	165.833	13.42	99.1667	13.42	126.667	13.42	124.167
13.44	140	13.44	113.333	13.44	146.667	13.44	96.6667	13.44	110	13.44	112.5
13.46	167.5	13.46	118.333	13.46	155	13.46	104.167	13.46	105	13.46	112.5
13.48	186.667	13.48	100.833	13.48	130	13.48	102.5	13.48	107.5	13.48	128.333
13.5	176.667	13.5	125.833	13.5	148.333	13.5	100.833	13.5	96.6667	13.5	119.167
13.52	170.833	13.52	113.333	13.52	153.333	13.52	109.167	13.52	105	13.52	99.1667
13.54	158.333	13.54	146.667	13.54	137.5	13.54	86.6667	13.54	114.167	13.54	121.667
13.56	159.167	13.56	127.5	13.56	152.5	13.56	100.833	13.56	117.5	13.56	119.167
13.58	163.333	13.58	138.333	13.58	150.833	13.58	93.3333	13.58	120.833	13.58	120.833
13.6	169.167	13.6	136.667	13.6	130	13.6	100	13.6	102.5	13.6	118.333
13.62	168.333	13.62	145.833	13.62	145	13.62	101.667	13.62	122.5	13.62	110
13.64	153.333	13.64	149.167	13.64	123.333	13.64	92.5	13.64	100	13.64	118.333
13.66	145	13.66	145.833	13.66	117.5	13.66	90.8333	13.66	96.6667	13.66	102.5
13.68	165.833	13.68	138.333	13.68	133.333	13.68	81.6667	13.68	120.833	13.68	130
13.7	177.5	13.7	149.167	13.7	128.333	13.7	90	13.7	116.667	13.7	118.333
13.72	161.667	13.72	142.5	13.72	124.167	13.72	99.1667	13.72	118.333	13.72	119.167
13.74	155	13.74	119.167	13.74	155	13.74	87.5	13.74	103.333	13.74	145
13.76	165	13.76	117.5	13.76	146.667	13.76	100	13.76	114.167	13.76	116.667
13.78	171.667	13.78	118.333	13.78	144.167	13.78	100	13.78	113.333	13.78	138.333
13.8	146.667	13.8	130	13.8	148.333	13.8	72.5	13.8	114.167	13.8	130.833
13.82	159.167	13.82	156.667	13.82	143.333	13.82	101.667	13.82	106.667	13.82	124.167
13.84	155.833	13.84	147.5	13.84	152.5	13.84	96.6667	13.84	107.5	13.84	125
13.86	159.167	13.86	151.667	13.86	135.833	13.86	98.3333	13.86	97.5	13.86	106.667
13.88	158.333	13.88	139.167	13.88	146.667	13.88	101.667	13.88	106.667	13.88	105.833
13.9	145	13.9	135.833	13.9	142.5	13.9	106.667	13.9	100.833	13.9	124.167
13.92	179.167	13.92	131.667	13.92	134.167	13.92	88.3333	13.92	115	13.92	124.167
13.94	164.167	13.94	127.5	13.94	163.333	13.94	100.833	13.94	114.167	13.94	100.833
13.96	165	13.96	124.167	13.96	133.333	13.96	90.8333	13.96	102.5	13.96	138.333
13.98	156.667	13.98	106.667	13.98	148.333	13.98	106.667	13.98	114.167	13.98	135
14	150.833	14	97.5	14	122.5	14	98.3333	14	105	14	115.833
14.02	161.667	14.02	112.5	14.02	150	14.02	95	14.02	120.833	14.02	141.667
14.04	155	14.04	99.1667	14.04	142.5	14.04	75	14.04	97.5	14.04	120.833
14.06	135	14.06	105.833	14.06	140	14.06	103.333	14.06	115.833	14.06	113.333
14.08	171.667	14.08	100	14.08	148.333	14.08	101.667	14.08	130.833	14.08	115
14.1	150	14.1	99.1667	14.1	122.5	14.1	103.333	14.1	106.667	14.1	115
14.12	157.5	14.12	92.5	14.12	135	14.12	108.333	14.12	96.6667	14.12	116.667
14.14	137.5	14.14	91.6667	14.14	145.833	14.14	95.8333	14.14	119.167	14.14	130.833
14.16	147.5	14.16	83.3333	14.16	125.833	14.16	75	14.16	115	14.16	101.667
14.18	166.667	14.18	105.833	14.18	133.333	14.18	94.1667	14.18	114.167	14.18	129.167
14.2	153.333	14.2	103.333	14.2	122.5	14.2	108.333	14.2	103.333	14.2	120
14.22	158.333	14.22	91.6667	14.22	136.667	14.22	100.833	14.22	131.667	14.22	110.833
14.24	173.333	14.24	98.3333	14.24	153.333	14.24	105	14.24	102.5	14.24	125
14.26	167.5	14.26	89.1667	14.26	152.5	14.26	107.5	14.26	115	14.26	126.667
14.28	143.333	14.28	79.1667	14.28	141.667	14.28	95	14.28	101.667	14.28	96.6667
14.3	173.333	14.3	105.833	14.3	149.167	14.3	93.3333	14.3	114.167	14.3	115
14.32	161.667	14.32	98.3333	14.32	134.167	14.32	100	14.32	112.5	14.32	139.167
14.34	161.667	14.34	99.1667	14.34	135.833	14.34	111.667	14.34	113.333	14.34	103.333
14.36	154.167	14.36	104.167	14.36	129.167	14.36	100.833	14.36	118.333	14.36	114.167
14.38	160	14.38	96.6667	14.38	130	14.38	95	14.38	99.1667	14.38	119.167
14.4	160.833	14.4	96.6667	14.4	139.167	14.4	101.667	14.4	110.833	14.4	123.333
14.42	151.667	14.42	94.1667	14.42	149.167	14.42	106.667	14.42	105.833	14.42	99.1667
14.44	199.167	14.44	103.333	14.44	158.333	14.44	92.5	14.44	120	14.44	117.5
14.46	157.5	14.46	111.667	14.46	134.167	14.46	105.833	14.46	109.167	14.46	132.5
14.48	183.333	14.48	104.167	14.48	140	14.48	99.1667	14.48	104.167	14.48	122.5
14.5	158.333	14.5	89.1667	14.5	131.667	14.5	91.6667	14.5	109.167	14.5	108.333
14.52	174.167	14.52	94.1667	14.52	150	14.52	89.1667	14.52	102.5	14.52	120
14.54	140.833	14.54	102.5	14.54	140.833	14.54	106.667	14.54	109.167	14.54	119.167
14.56	164.167	14.56	87.5	14.56	146.667	14.56	95	14.56	109.167	14.56	119.167
14.58	180	14.58	115	14.58	136.667	14.58	90.8333	14.58	99.1667	14.58	120
14.6	155	14.6	105	14.6	154.167	14.6	99.1667	14.6	117.5	14.6	131.667
14.62	161.667	14.62	128.333	14.62	136.667	14.62	98.3333	14.62	116.667	14.62	126.667
14.64	160.833	14.64	95	14.64	137.5	14.64	102.5	14.64	114.167	14.64	128.333
14.66	162.5	14.66	105.833	14.66	139.167	14.66	105.833	14.66	115.833	14.66	130
14.68	173.333	14.68	101.667	14.68	129.167	14.68	106.667	14.68	121.667	14.68	108.333
14.7	154.167	14.7	96.6667	14.7	164.167	14.7	100	14.7	104.167	14.7	117.5
14.72	170.833	14.72	94.1667	14.72	142.5	14.72	98.3333	14.72	94.1667	14.72	122.5
14.74	172.5	14.74	106.667	14.74	133.333	14.74	91.6667	14.74	110	14.74	133.333
14.76	156.667	14.76	93.3333	14.76	150	14.76	100	14.76	114.167	14.76	108.333
14.78	170.833	14.78	93.3333	14.78	155	14.78	94.1667	14.78	115.833	14.78	115.833
14.8	153.333	14.8	111.667	14.8	149.167	14.8	86.6667	14.8	96.6667	14.8	107.5
14.82	165.833	14.82	112.5	14.82	135	14.82	103.333	14.82	112.5	14.82	125.833
14.84	145.833	14.84	95	14.84	145.833	14.84	118.333	14.84	128.333	14.84	119.167
14.86	165	14.86	110	14.86	135.833	14.86	96.6667	14.86	95.8333	14.86	119.167
14.88	155.833	14.88	101.667	14.88	130.833	14.88	97.5	14.88	106.667	14.88	115
14.9	151.667	14.9	118.333	14.9	139.167	14.9	93.3333	14.9	110.833	14.9	134.167
14.92	180.833	14.92	102.5	14.92	143.333	14.92	98.3333	14.92	118.333	14.92	130
14.94	173.333	14.94	97.5	14.94	149.167	14.94	97.5	14.94	117.5	14.94	145
14.96	155	14.96	93.3333	14.96	128.333	14.96	96.6667	14.96	113.333	14.96	101.667
14.98	162.5	14.98	109.167	14.98	145.833	14.98	100.833	14.98	115.833	14.98	120
15	163.333	15	107.5	15	142.5	15	112.5	15	117.5	15	140.833
15.02	160	15.02	115	15.02	162.5	15.02	90.8333	15.02	122.5	15.02	104.167
15.04	159.167	15.04	125	15.04	145.833	15.04	99.1667	15.04	117.5	15.04	128.333
15.06	179.167	15.06	120.833	15.06	155.833	15.06	101.667	15.06	124.167	15.06	144.167
15.08	141.667	15.08	120	15.08	145.833	15.08	100	15.08	105.833	15.08	115.833
15.1	173.333	15.1	124.167	15.1	120	15.1	110.833	15.1	117.5	15.1	117.5
15.12	165	15.12	147.5	15.12	160	15.12	95.8333	15.12	104.167	15.12	126.667
15.14	164.167	15.14	158.333	15.14	143.333	15.14	109.167	15.14	110.833	15.14	126.667
15.16	157.5	15.16	156.667	15.16	155.833	15.16	95	15.16	110	15.16	129.167
15.18	167.5	15.18	165.833	15.18	152.5	15.18	84.1667	15.18	113.333	15.18	125.833
15.2	187.5	15.2	163.333	15.2	146.667	15.2	99.1667	15.2	112.5	15.2	122.5
15.22	164.167	15.22	185.833	15.22	153.333	15.22	90.8333	15.22	104.167	15.22	116.667
15.24	140	15.24	197.5	15.24	142.5	15.24	111.667	15.24	116.667	15.24	123.333
15.26	167.5	15.26	180.833	15.26	125.833	15.26	109.167	15.26	116.667	15.26	133.333
15.28	185.833	15.28	170.833	15.28	153.333	15.28	102.5	15.28	126.667	15.28	143.333
15.3	172.5	15.3	153.333	15.3	147.5	15.3	95.8333	15.3	110	15.3	132.5
15.32	191.667	15.32	136.667	15.32	136.667	15.32	102.5	15.32	128.333	15.32	149.167
15.34	160	15.34	120	15.34	147.5	15.34	108.333	15.34	113.333	15.34	120.833
15.36	153.333	15.36	123.333	15.36	175.833	15.36	95	15.36	117.5	15.36	120.833
15.38	165.833	15.38	111.667	15.38	169.167	15.38	114.167	15.38	130.833	15.38	148.333
15.4	177.5	15.4	119.167	15.4	141.667	15.4	120	15.4	105.833	15.4	120.833
15.42	191.667	15.42	93.3333	15.42	155	15.42	106.667	15.42	126.667	15.42	133.333
15.44	176.667	15.44	102.5	15.44	144.167	15.44	113.333	15.44	122.5	15.44	115.833
15.46	162.5	15.46	109.167	15.46	138.333	15.46	111.667	15.46	122.5	15.46	129.167
15.48	170	15.48	110.833	15.48	154.167	15.48	101.667	15.48	129.167	15.48	133.333
15.5	175	15.5	110	15.5	157.5	15.5	97.5	15.5	108.333	15.5	116.667
15.52	145.833	15.52	96.6667	15.52	151.667	15.52	106.667	15.52	125.833	15.52	134.167
15.54	143.333	15.54	99.1667	15.54	156.667	15.54	93.3333	15.54	125.833	15.54	132.5
15.56	168.333	15.56	114.167	15.56	151.667	15.56	105.833	15.56	115.833	15.56	141.667
15.58	160	15.58	125	15.58	131.667	15.58	98.3333	15.58	105.833	15.58	142.5
15.6	167.5	15.6	122.5	15.6	144.167	15.6	96.6667	15.6	130.833	15.6	123.333
15.62	160	15.62	114.167	15.62	137.5	15.62	98.3333	15.62	119.167	15.62	120.833
15.64	175.833	15.64	117.5	15.64	151.667	15.64	103.333	15.64	110	15.64	127.5
15.66	154.167	15.66	142.5	15.66	133.333	15.66	99.1667	15.66	125.833	15.66	125
15.68	156.667	15.68	115	15.68	162.5	15.68	103.333	15.68	122.5	15.68	129.167
15.7	175.833	15.7	125	15.7	139.167	15.7	120.833	15.7	124.167	15.7	141.667
15.72	152.5	15.72	139.167	15.72	166.667	15.72	116.667	15.72	130.833	15.72	141.667
15.74	180	15.74	133.333	15.74	145.833	15.74	111.667	15.74	129.167	15.74	110.833
15.76	182.5	15.76	134.167	15.76	141.667	15.76	104.167	15.76	136.667	15.76	130.833
15.78	159.167	15.78	116.667	15.78	158.333	15.78	102.5	15.78	118.333	15.78	121.667
15.8	169.167	15.8	95	15.8	140	15.8	103.333	15.8	125	15.8	126.667
15.82	209.167	15.82	109.167	15.82	148.333	15.82	105	15.82	129.167	15.82	138.333
15.84	160	15.84	109.167	15.84	140	15.84	110.833	15.84	124.167	15.84	112.5
15.86	185	15.86	107.5	15.86	150.833	15.86	126.667	15.86	120.833	15.86	116.667
15.88	179.167	15.88	94.1667	15.88	140	15.88	112.5	15.88	118.333	15.88	135.833
15.9	179.167	15.9	112.5	15.9	160	15.9	126.667	15.9	119.167	15.9	114.167
15.92	171.667	15.92	120	15.92	146.667	15.92	106.667	15.92	124.167	15.92	145
15.94	196.667	15.94	105.833	15.94	157.5	15.94	106.667	15.94	124.167	15.94	149.167
15.96	152.5	15.96	110	15.96	140	15.96	120	15.96	113.333	15.96	140.833
15.98	185	15.98	106.667	15.98	155.833	15.98	90	15.98	130	15.98	119.167
16	181.667	16	111.667	16	145	16	96.6667	16	114.167	16	125.833
16.02	195.833	16.02	104.167	16.02	164.167	16.02	112.5	16.02	144.167	16.02	150
16.04	152.5	16.04	89.1667	16.04	136.667	16.04	119.167	16.04	128.333	16.04	128.333
16.06	170.833	16.06	100	16.06	150	16.06	114.167	16.06	122.5	16.06	135.833
16.08	176.667	16.08	114.167	16.08	150.833	16.08	95.8333	16.08	120	16.08	131.667
16.1	160.833	16.1	116.667	16.1	169.167	16.1	100.833	16.1	127.5	16.1	145.833
16.12	168.333	16.12	97.5	16.12	163.333	16.12	116.667	16.12	118.333	16.12	117.5
16.14	169.167	16.14	109.167	16.14	151.667	16.14	107.5	16.14	112.5	16.14	127.5
16.16	195.833	16.16	101.667	16.16	148.333	16.16	108.333	16.16	119.167	16.16	135.833
16.18	185.833	16.18	98.3333	16.18	146.667	16.18	117.5	16.18	135	16.18	114.167
16.2	170	16.2	102.5	16.2	135.833	16.2	104.167	16.2	117.5	16.2	121.667
16.22	185.833	16.22	102.5	16.22	149.167	16.22	105.833	16.22	111.667	16.22	119.167
16.24	185.833	16.24	88.3333	16.24	142.5	16.24	130	16.24	125	16.24	131.667
16.26	198.333	16.26	117.5	16.26	164.167	16.26	104.167	16.26	117.5	16.26	132.5
16.28	204.167	16.28	102.5	16.28	162.5	16.28	128.333	16.28	133.333	16.28	135
16.3	190	16.3	110	16.3	173.333	16.3	105.833	16.3	130	16.3	138.333
16.32	200	16.32	103.333	16.32	155.833	16.32	129.167	16.32	119.167	16.32	137.5
16.34	176.667	16.34	117.5	16.34	142.5	16.34	106.667	16.34	125	16.34	127.5
16.36	157.5	16.36	120	16.36	156.667	16.36	103.333	16.36	127.5	16.36	137.5
16.38	170.833	16.38	111.667	16.38	136.667	16.38	112.5	16.38	132.5	16.38	148.333
16.4	168.333	16.4	114.167	16.4	163.333	16.4	120.833	16.4	139.167	16.4	130
16.42	181.667	16.42	115	16.42	151.667	16.42	125	16.42	131.667	16.42	133.333
16.44	178.333	16.44	110.833	16.44	163.333	16.44	105	16.44	105	16.44	125
16.46	150	16.46	127.5	16.46	175	16.46	104.167	16.46	137.5	16.46	134.167
16.48	182.5	16.48	104.167	16.48	167.5	16.48	121.667	16.48	125	16.48	137.5
16.5	168.333	16.5	113.333	16.5	164.167	16.5	100	16.5	125.833	16.5	135.833
16.52	170	16.52	112.5	16.52	171.667	16.52	109.167	16.52	121.667	16.52	140.833
16.54	176.667	16.54	109.167	16.54	143.333	16.54	125	16.54	134.167	16.54	126.667
16.56	163.333	16.56	115	16.56	161.667	16.56	116.667	16.56	118.333	16.56	146.667
16.58	177.5	16.58	114.167	16.58	150.833	16.58	107.5	16.58	129.167	16.58	144.167
16.6	178.333	16.6	117.5	16.6	150	16.6	125.833	16.6	128.333	16.6	140
16.62	161.667	16.62	133.333	16.62	179.167	16.62	116.667	16.62	135.833	16.62	135.833
16.64	177.5	16.64	122.5	16.64	168.333	16.64	123.333	16.64	127.5	16.64	115.833
16.66	149.167	16.66	126.667	16.66	165.833	16.66	110.833	16.66	141.667	16.66	115.833
16.68	194.167	16.68	149.167	16.68	161.667	16.68	119.167	16.68	162.5	16.68	135.833
16.7	172.5	16.7	145.833	16.7	165.833	16.7	125	16.7	125	16.7	141.667
16.72	182.5	16.72	161.667	16.72	151.667	16.72	131.667	16.72	137.5	16.72	127.5
16.74	165.833	16.74	159.167	16.74	168.333	16.74	105	16.74	150.833	16.74	132.5
16.76	185	16.76	176.667	16.76	155	16.76	126.667	16.76	138.333	16.76	123.333
16.78	190.833	16.78	178.333	16.78	152.5	16.78	117.5	16.78	140	16.78	149.167
16.8	213.333	16.8	188.333	16.8	181.667	16.8	107.5	16.8	156.667	16.8	125.833
16.82	190	16.82	193.333	16.82	167.5	16.82	110.833	16.82	133.333	16.82	125.833
16.84	165.833	16.84	180	16.84	134.167	16.84	133.333	16.84	145	16.84	150.833
16.86	171.667	16.86	189.167	16.86	163.333	16.86	110	16.86	144.167	16.86	127.5
16.88	177.5	16.88	186.667	16.88	168.333	16.88	110	16.88	119.167	16.88	155
16.9	179.167	16.9	163.333	16.9	171.667	16.9	121.667	16.9	121.667	16.9	147.5
16.92	208.333	16.92	196.667	16.92	169.167	16.92	120	16.92	131.667	16.92	144.167
16.94	201.667	16.94	173.333	16.94	156.667	16.94	110.833	16.94	148.333	16.94	153.333
16.96	170	16.96	152.5	16.96	175	16.96	128.333	16.96	135	16.96	136.667
16.98	201.667	16.98	141.667	16.98	184.167	16.98	130	16.98	155.833	16.98	140
17	173.333	17	154.167	17	159.167	17	119.167	17	150.833	17	148.333
17.02	180.833	17.02	162.5	17.02	188.333	17.02	114.167	17.02	129.167	17.02	152.5
17.04	200.833	17.04	180.833	17.04	162.5	17.04	124.167	17.04	110	17.04	134.167
17.06	183.333	17.06	180.833	17.06	175	17.06	116.667	17.06	147.5	17.06	140.833
17.08	189.167	17.08	186.667	17.08	175.833	17.08	120.833	17.08	124.167	17.08	140
17.1	183.333	17.1	218.333	17.1	167.5	17.1	122.5	17.1	140	17.1	145.833
17.12	180.833	17.12	231.667	17.12	181.667	17.12	134.167	17.12	112.5	17.12	125.833
17.14	171.667	17.14	231.667	17.14	178.333	17.14	125.833	17.14	134.167	17.14	160
17.16	195	17.16	203.333	17.16	154.167	17.16	127.5	17.16	138.333	17.16	135.833
17.18	173.333	17.18	224.167	17.18	187.5	17.18	138.333	17.18	168.333	17.18	164.167
17.2	210	17.2	257.5	17.2	161.667	17.2	125	17.2	158.333	17.2	125
17.22	198.333	17.22	217.5	17.22	140	17.22	130.833	17.22	131.667	17.22	164.167
17.24	212.5	17.24	208.333	17.24	163.333	17.24	125	17.24	145	17.24	144.167
17.26	185.833	17.26	190.833	17.26	177.5	17.26	114.167	17.26	120.833	17.26	155.833
17.28	210	17.28	210.833	17.28	173.333	17.28	111.667	17.28	157.5	17.28	143.333
17.3	186.667	17.3	210	17.3	175.833	17.3	132.5	17.3	135	17.3	143.333
17.32	165.833	17.32	222.5	17.32	150.833	17.32	144.167	17.32	145.833	17.32	147.5
17.34	192.5	17.34	219.167	17.34	171.667	17.34	123.333	17.34	140	17.34	156.667
17.36	210.833	17.36	201.667	17.36	170.833	17.36	127.5	17.36	135	17.36	157.5
17.38	200	17.38	180	17.38	185	17.38	118.333	17.38	148.333	17.38	114.167
17.4	213.333	17.4	171.667	17.4	175	17.4	124.167	17.4	142.5	17.4	163.333
17.42	199.167	17.42	145	17.42	173.333	17.42	128.333	17.42	154.167	17.42	150.833
17.44	187.5	17.44	167.5	17.44	165	17.44	113.333	17.44	135.833	17.44	141.667
17.46	200.833	17.46	146.667	17.46	184.167	17.46	130.833	17.46	135	17.46	137.5
17.48	179.167	17.48	133.333	17.48	193.333	17.48	123.333	17.48	156.667	17.48	167.5
17.5	219.167	17.5	120.833	17.5	168.333	17.5	155.833	17.5	150.833	17.5	139.167
17.52	209.167	17.52	113.333	17.52	180	17.52	121.667	17.52	138.333	17.52	142.5
17.54	205.833	17.54	124.167	17.54	173.333	17.54	134.167	17.54	166.667	17.54	147.5
17.56	191.667	17.56	142.5	17.56	171.667	17.56	139.167	17.56	151.667	17.56	152.5
17.58	205	17.58	125	17.58	171.667	17.58	130	17.58	120	17.58	166.667
17.6	186.667	17.6	115	17.6	164.167	17.6	125.833	17.6	140	17.6	149.167
17.62	174.167	17.62	135	17.62	166.667	17.62	128.333	17.62	122.5	17.62	165.833
17.64	177.5	17.64	128.333	17.64	154.167	17.64	163.333	17.64	135	17.64	170
17.66	210.833	17.66	125.833	17.66	183.333	17.66	133.333	17.66	129.167	17.66	176.667
17.68	199.167	17.68	148.333	17.68	176.667	17.68	140	17.68	155	17.68	141.667
17.7	212.5	17.7	128.333	17.7	190.833	17.7	126.667	17.7	134.167	17.7	140.833
17.72	195.833	17.72	134.167	17.72	160	17.72	140.833	17.72	146.667	17.72	153.333
17.74	207.5	17.74	127.5	17.74	186.667	17.74	129.167	17.74	160	17.74	165
17.76	209.167	17.76	134.167	17.76	194.167	17.76	125.833	17.76	184.167	17.76	149.167
17.78	205.833	17.78	146.667	17.78	185	17.78	138.333	17.78	160	17.78	153.333
17.8	200	17.8	135.833	17.8	200.833	17.8	130.833	17.8	158.333	17.8	160.833
17.82	203.333	17.82	139.167	17.82	201.667	17.82	120	17.82	122.5	17.82	165
17.84	209.167	17.84	155.833	17.84	175	17.84	124.167	17.84	146.667	17.84	170
17.86	198.333	17.86	145.833	17.86	214.167	17.86	115.833	17.86	155.833	17.86	161.667
17.88	202.5	17.88	161.667	17.88	165	17.88	154.167	17.88	166.667	17.88	161.667
17.9	195	17.9	154.167	17.9	192.5	17.9	149.167	17.9	167.5	17.9	156.667
17.92	213.333	17.92	175.833	17.92	189.167	17.92	135	17.92	162.5	17.92	156.667
17.94	185.833	17.94	179.167	17.94	187.5	17.94	136.667	17.94	178.333	17.94	158.333
17.96	210.833	17.96	165.833	17.96	179.167	17.96	136.667	17.96	153.333	17.96	159.167
17.98	210.833	17.98	176.667	17.98	185	17.98	136.667	17.98	152.5	17.98	165.833
18	220	18	229.167	18	180.833	18	140	18	155.833	18	171.667
18.02	208.333	18.02	230.833	18.02	179.167	18.02	120	18.02	135	18.02	143.333
18.04	207.5	18.04	228.333	18.04	201.667	18.04	151.667	18.04	149.167	18.04	152.5
18.06	198.333	18.06	290	18.06	200.833	18.06	148.333	18.06	147.5	18.06	144.167
18.08	218.333	18.08	315	18.08	185.833	18.08	123.333	18.08	167.5	18.08	149.167
18.1	225	18.1	299.167	18.1	170.833	18.1	145	18.1	168.333	18.1	170.833
18.12	204.167	18.12	319.167	18.12	220	18.12	128.333	18.12	149.167	18.12	160
18.14	195	18.14	317.5	18.14	172.5	18.14	130.833	18.14	155.833	18.14	175.833
18.16	210.833	18.16	295.833	18.16	180.833	18.16	141.667	18.16	163.333	18.16	181.667
18.18	215	18.18	282.5	18.18	190.833	18.18	138.333	18.18	160	18.18	167.5
18.2	213.333	18.2	291.667	18.2	175.833	18.2	151.667	18.2	178.333	18.2	164.167
18.22	226.667	18.22	243.333	18.22	193.333	18.22	146.667	18.22	155.833	18.22	179.167
18.24	218.333	18.24	232.5	18.24	184.167	18.24	150.833	18.24	141.667	18.24	169.167
18.26	196.667	18.26	190.833	18.26	179.167	18.26	137.5	18.26	151.667	18.26	169.167
18.28	220.833	18.28	170.833	18.28	205.833	18.28	138.333	18.28	165	18.28	172.5
18.3	223.333	18.3	146.667	18.3	213.333	18.3	152.5	18.3	174.167	18.3	161.667
18.32	223.333	18.32	146.667	18.32	186.667	18.32	138.333	18.32	188.333	18.32	161.667
18.34	205	18.34	151.667	18.34	185.833	18.34	125.833	18.34	159.167	18.34	175.833
18.36	211.667	18.36	144.167	18.36	180	18.36	150	18.36	158.333	18.36	170.833
18.38	214.167	18.38	152.5	18.38	185.833	18.38	135	18.38	169.167	18.38	152.5
18.4	198.333	18.4	171.667	18.4	200.833	18.4	150	18.4	165.833	18.4	176.667
18.42	224.167	18.42	137.5	18.42	210	18.42	146.667	18.42	147.5	18.42	195.833
18.44	231.667	18.44	137.5	18.44	190.833	18.44	136.667	18.44	183.333	18.44	165
18.46	215	18.46	140	18.46	205.833	18.46	149.167	18.46	156.667	18.46	189.167
18.48	201.667	18.48	127.5	18.48	209.167	18.48	149.167	18.48	189.167	18.48	160
18.5	236.667	18.5	147.5	18.5	195	18.5	121.667	18.5	167.5	18.5	176.667
18.52	241.667	18.52	160	18.52	205	18.52	147.5	18.52	178.333	18.52	177.5
18.54	238.333	18.54	169.167	18.54	190	18.54	140	18.54	191.667	18.54	171.667
18.56	229.167	18.56	135	18.56	220	18.56	142.5	18.56	174.167	18.56	176.667
18.58	202.5	18.58	154.167	18.58	185	18.58	140	18.58	150	18.58	185
18.6	222.5	18.6	150	18.6	195	18.6	150	18.6	144.167	18.6	166.667
18.62	232.5	18.62	153.333	18.62	205.833	18.62	158.333	18.62	163.333	18.62	165.833
18.64	222.5	18.64	164.167	18.64	205.833	18.64	149.167	18.64	173.333	18.64	175.833
18.66	233.333	18.66	157.5	18.66	232.5	18.66	135.833	18.66	161.667	18.66	175.833
18.68	212.5	18.68	170	18.68	218.333	18.68	123.333	18.68	166.667	18.68	171.667
18.7	233.333	18.7	145.833	18.7	214.167	18.7	150.833	18.7	186.667	18.7	161.667
18.72	233.333	18.72	162.5	18.72	225	18.72	153.333	18.72	173.333	18.72	188.333
18.74	226.667	18.74	155.833	18.74	210.833	18.74	155	18.74	196.667	18.74	187.5
18.76	211.667	18.76	162.5	18.76	201.667	18.76	152.5	18.76	179.167	18.76	149.167
18.78	207.5	18.78	160.833	18.78	215	18.78	158.333	18.78	184.167	18.78	181.667
18.8	250.833	18.8	141.667	18.8	208.333	18.8	147.5	18.8	157.5	18.8	185
18.82	241.667	18.82	165.833	18.82	212.5	18.82	155.833	18.82	172.5	18.82	179.167
18.84	220.833	18.84	151.667	18.84	217.5	18.84	160	18.84	168.333	18.84	155.833
18.86	244.167	18.86	159.167	18.86	190.833	18.86	165	18.86	168.333	18.86	173.333
18.88	244.167	18.88	136.667	18.88	211.667	18.88	160	18.88	179.167	18.88	175
18.9	222.5	18.9	145	18.9	198.333	18.9	139.167	18.9	188.333	18.9	159.167
18.92	265	18.92	147.5	18.92	215	18.92	153.333	18.92	187.5	18.92	168.333
18.94	232.5	18.94	149.167	18.94	210.833	18.94	163.333	18.94	147.5	18.94	189.167
18.96	262.5	18.96	160	18.96	200	18.96	178.333	18.96	180.833	18.96	176.667
18.98	230	18.98	147.5	18.98	220.833	18.98	150.833	18.98	189.167	18.98	196.667
19	239.167	19	124.167	19	235.833	19	167.5	19	179.167	19	184.167
19.02	242.5	19.02	127.5	19.02	195	19.02	185	19.02	188.333	19.02	189.167
19.04	249.167	19.04	160	19.04	213.333	19.04	161.667	19.04	169.167	19.04	175.833
19.06	220.833	19.06	149.167	19.06	222.5	19.06	150	19.06	168.333	19.06	185.833
19.08	255	19.08	147.5	19.08	214.167	19.08	157.5	19.08	186.667	19.08	175
19.1	248.333	19.1	165	19.1	219.167	19.1	151.667	19.1	171.667	19.1	178.333
19.12	213.333	19.12	154.167	19.12	249.167	19.12	167.5	19.12	184.167	19.12	181.667
19.14	236.667	19.14	155.833	19.14	218.333	19.14	166.667	19.14	196.667	19.14	185
19.16	236.667	19.16	142.5	19.16	215	19.16	155.833	19.16	170	19.16	202.5
19.18	238.333	19.18	144.167	19.18	218.333	19.18	185.833	19.18	177.5	19.18	191.667
19.2	246.667	19.2	153.333	19.2	229.167	19.2	149.167	19.2	164.167	19.2	183.333
19.22	273.333	19.22	151.667	19.22	232.5	19.22	156.667	19.22	175	19.22	213.333
19.24	229.167	19.24	158.333	19.24	223.333	19.24	168.333	19.24	180	19.24	203.333
19.26	245	19.26	173.333	19.26	243.333	19.26	168.333	19.26	172.5	19.26	203.333
19.28	265	19.28	182.5	19.28	224.167	19.28	157.5	19.28	185.833	19.28	179.167
19.3	278.333	19.3	152.5	19.3	208.333	19.3	179.167	19.3	186.667	19.3	198.333
19.32	230.833	19.32	171.667	19.32	205	19.32	150.833	19.32	169.167	19.32	200
19.34	250.833	19.34	154.167	19.34	223.333	19.34	162.5	19.34	197.5	19.34	180.833
19.36	233.333	19.36	155	19.36	238.333	19.36	171.667	19.36	173.333	19.36	185
19.38	276.667	19.38	168.333	19.38	212.5	19.38	145.833	19.38	179.167	19.38	173.333
19.4	239.167	19.4	152.5	19.4	220.833	19.4	195	19.4	181.667	19.4	195
19.42	251.667	19.42	188.333	19.42	225	19.42	160.833	19.42	174.167	19.42	179.167
19.44	260.833	19.44	157.5	19.44	215	19.44	175.833	19.44	187.5	19.44	204.167
19.46	292.5	19.46	168.333	19.46	219.167	19.46	182.5	19.46	201.667	19.46	184.167
19.48	250.833	19.48	142.5	19.48	213.333	19.48	177.5	19.48	189.167	19.48	170.833
19.5	274.167	19.5	157.5	19.5	218.333	19.5	156.667	19.5	206.667	19.5	191.667
19.52	245.833	19.52	151.667	19.52	235.833	19.52	175	19.52	191.667	19.52	217.5
19.54	267.5	19.54	156.667	19.54	235	19.54	152.5	19.54	181.667	19.54	178.333
19.56	251.667	19.56	156.667	19.56	215.833	19.56	170.833	19.56	198.333	19.56	200
19.58	247.5	19.58	187.5	19.58	229.167	19.58	185	19.58	212.5	19.58	212.5
19.6	264.167	19.6	170.833	19.6	257.5	19.6	163.333	19.6	180	19.6	211.667
19.62	282.5	19.62	170.833	19.62	226.667	19.62	168.333	19.62	190.833	19.62	175.833
19.64	283.333	19.64	178.333	19.64	235.833	19.64	163.333	19.64	223.333	19.64	197.5
19.66	263.333	19.66	164.167	19.66	247.5	19.66	171.667	19.66	201.667	19.66	218.333
19.68	269.167	19.68	173.333	19.68	215.833	19.68	172.5	19.68	168.333	19.68	190
19.7	255	19.7	168.333	19.7	224.167	19.7	162.5	19.7	207.5	19.7	204.167
19.72	250	19.72	175.833	19.72	223.333	19.72	191.667	19.72	215.833	19.72	197.5
19.74	264.167	19.74	162.5	19.74	261.667	19.74	179.167	19.74	179.167	19.74	200
19.76	284.167	19.76	187.5	19.76	230	19.76	176.667	19.76	203.333	19.76	194.167
19.78	255	19.78	196.667	19.78	227.5	19.78	185	19.78	195.833	19.78	186.667
19.8	282.5	19.8	180.833	19.8	243.333	19.8	171.667	19.8	189.167	19.8	194.167
19.82	259.167	19.82	164.167	19.82	270	19.82	200.833	19.82	207.5	19.82	231.667
19.84	265.833	19.84	170	19.84	235.833	19.84	177.5	19.84	207.5	19.84	209.167
19.86	256.667	19.86	170	19.86	240	19.86	208.333	19.86	195.833	19.86	205.833
19.88	258.333	19.88	174.167	19.88	245.833	19.88	175	19.88	193.333	19.88	175
19.9	252.5	19.9	170	19.9	250.833	19.9	187.5	19.9	200.833	19.9	185
19.92	275.833	19.92	164.167	19.92	240.833	19.92	174.167	19.92	200.833	19.92	222.5
19.94	275.833	19.94	150.833	19.94	242.5	19.94	189.167	19.94	179.167	19.94	203.333
19.96	267.5	19.96	180.833	19.96	225.833	19.96	168.333	19.96	230	19.96	221.667
19.98	267.5	19.98	163.333	19.98	273.333	19.98	161.667	19.98	195.833	19.98	198.333
20	255.833	20	162.5	20	251.667	20	178.333	20	189.167	20	213.333
20.02	280	20.02	173.333	20.02	246.667	20.02	183.333	20.02	205.833	20.02	207.5
20.04	321.667	20.04	170	20.04	266.667	20.04	160	20.04	201.667	20.04	217.5
20.06	308.333	20.06	170	20.06	280.833	20.06	186.667	20.06	230	20.06	223.333
20.08	305	20.08	162.5	20.08	250	20.08	165.833	20.08	214.167	20.08	228.333
20.1	298.333	20.1	165.833	20.1	255	20.1	146.667	20.1	210.833	20.1	214.167
20.12	275.833	20.12	156.667	20.12	267.5	20.12	180.833	20.12	231.667	20.12	226.667
20.14	290.833	20.14	191.667	20.14	253.333	20.14	217.5	20.14	212.5	20.14	202.5
20.16	259.167	20.16	165	20.16	277.5	20.16	164.167	20.16	230.833	20.16	210
20.18	300	20.18	173.333	20.18	261.667	20.18	203.333	20.18	195.833	20.18	218.333
20.2	280.833	20.2	155.833	20.2	260.833	20.2	184.167	20.2	215.833	20.2	209.167
20.22	295.833	20.22	179.167	20.22	259.167	20.22	180.833	20.22	188.333	20.22	223.333
20.24	262.5	20.24	188.333	20.24	277.5	20.24	182.5	20.24	222.5	20.24	210
20.26	256.667	20.26	186.667	20.26	280.833	20.26	178.333	20.26	190	20.26	216.667
20.28	299.167	20.28	190	20.28	260	20.28	185	20.28	232.5	20.28	225.833
20.3	306.667	20.3	183.333	20.3	245.833	20.3	179.167	20.3	230	20.3	233.333
20.32	276.667	20.32	192.5	20.32	250.833	20.32	185	20.32	257.5	20.32	222.5
20.34	294.167	20.34	167.5	20.34	251.667	20.34	179.167	20.34	241.667	20.34	225.833
20.36	278.333	20.36	182.5	20.36	278.333	20.36	182.5	20.36	215.833	20.36	178.333
20.38	287.5	20.38	172.5	20.38	262.5	20.38	180.833	20.38	236.667	20.38	225
20.4	313.333	20.4	172.5	20.4	275	20.4	191.667	20.4	190	20.4	222.5
20.42	296.667	20.42	164.167	20.42	296.667	20.42	158.333	20.42	237.5	20.42	247.5
20.44	295	20.44	188.333	20.44	240.833	20.44	199.167	20.44	230.833	20.44	226.667
20.46	306.667	20.46	164.167	20.46	284.167	20.46	215.833	20.46	220	20.46	226.667
20.48	315	20.48	190	20.48	253.333	20.48	185.833	20.48	212.5	20.48	220
20.5	271.667	20.5	185	20.5	253.333	20.5	200	20.5	228.333	20.5	214.167
20.52	281.667	20.52	182.5	20.52	299.167	20.52	184.167	20.52	214.167	20.52	224.167
20.54	286.667	20.54	184.167	20.54	245.833	20.54	191.667	20.54	246.667	20.54	205
20.56	318.333	20.56	182.5	20.56	271.667	20.56	175.833	20.56	229.167	20.56	231.667
20.58	313.333	20.58	212.5	20.58	265	20.58	188.333	20.58	221.667	20.58	226.667
20.6	296.667	20.6	185	20.6	287.5	20.6	179.167	20.6	230	20.6	225
20.62	310	20.62	178.333	20.62	248.333	20.62	187.5	20.62	228.333	20.62	226.667
20.64	289.167	20.64	210	20.64	255	20.64	195.833	20.64	213.333	20.64	235.833
20.66	309.167	20.66	206.667	20.66	277.5	20.66	195.833	20.66	247.5	20.66	225
20.68	318.333	20.68	177.5	20.68	269.167	20.68	213.333	20.68	230.833	20.68	243.333
20.7	300.833	20.7	203.333	20.7	257.5	20.7	212.5	20.7	211.667	20.7	248.333
20.72	305	20.72	184.167	20.72	286.667	20.72	191.667	20.72	225.833	20.72	255
20.74	286.667	20.74	191.667	20.74	275	20.74	219.167	20.74	252.5	20.74	217.5
20.76	313.333	20.76	202.5	20.76	275.833	20.76	205.833	20.76	217.5	20.76	217.5
20.78	299.167	20.78	205.833	20.78	270	20.78	200.833	20.78	234.167	20.78	225
20.8	318.333	20.8	185.833	20.8	259.167	20.8	197.5	20.8	206.667	20.8	236.667
20.82	329.167	20.82	207.5	20.82	275	20.82	192.5	20.82	238.333	20.82	237.5
20.84	333.333	20.84	215	20.84	263.333	20.84	206.667	20.84	218.333	20.84	235.833
20.86	304.167	20.86	197.5	20.86	284.167	20.86	199.167	20.86	220	20.86	240.833
20.88	297.5	20.88	220	20.88	286.667	20.88	206.667	20.88	249.167	20.88	243.333
20.9	316.667	20.9	224.167	20.9	280.833	20.9	215.833	20.9	204.167	20.9	261.667
20.92	318.333	20.92	249.167	20.92	304.167	20.92	217.5	20.92	234.167	20.92	241.667
20.94	312.5	20.94	225.833	20.94	289.167	20.94	209.167	20.94	255.833	20.94	290.833
20.96	307.5	20.96	226.667	20.96	294.167	20.96	224.167	20.96	226.667	20.96	228.333
20.98	294.167	20.98	214.167	20.98	287.5	20.98	233.333	20.98	232.5	20.98	234.167
21	327.5	21	219.167	21	270	21	198.333	21	215.833	21	250.833
21.02	300.833	21.02	220.833	21.02	261.667	21.02	205	21.02	230	21.02	245
21.04	338.333	21.04	195	21.04	310.833	21.04	216.667	21.04	212.5	21.04	252.5
21.06	279.167	21.06	219.167	21.06	297.5	21.06	205	21.06	260	21.06	244.167
21.08	363.333	21.08	228.333	21.08	317.5	21.08	216.667	21.08	230.833	21.08	252.5
21.1	338.333	21.1	214.167	21.1	275	21.1	228.333	21.1	240.833	21.1	232.5
21.12	308.333	21.12	195	21.12	326.667	21.12	190	21.12	240	21.12	239.167
21.14	333.333	21.14	232.5	21.14	321.667	21.14	203.333	21.14	260.833	21.14	275
21.16	320.833	21.16	218.333	21.16	270.833	21.16	224.167	21.16	229.167	21.16	268.333
21.18	316.667	21.18	180.833	21.18	315	21.18	217.5	21.18	249.167	21.18	246.667
21.2	348.333	21.2	226.667	21.2	295.833	21.2	215.833	21.2	238.333	21.2	253.333
21.22	338.333	21.22	220	21.22	276.667	21.22	227.5	21.22	235.833	21.22	260
21.24	297.5	21.24	215.833	21.24	308.333	21.24	200	21.24	225.833	21.24	241.667
21.26	331.667	21.26	215.833	21.26	318.333	21.26	188.333	21.26	225	21.26	275
21.28	329.167	21.28	205	21.28	300	21.28	222.5	21.28	245.833	21.28	261.667
21.3	343.333	21.3	212.5	21.3	296.667	21.3	228.333	21.3	272.5	21.3	272.5
21.32	312.5	21.32	231.667	21.32	315.833	21.32	220	21.32	231.667	21.32	230
21.34	349.167	21.34	219.167	21.34	299.167	21.34	240.833	21.34	240.833	21.34	246.667
21.36	335	21.36	210.833	21.36	312.5	21.36	213.333	21.36	231.667	21.36	252.5
21.38	318.333	21.38	204.167	21.38	327.5	21.38	229.167	21.38	253.333	21.38	276.667
21.4	356.667	21.4	206.667	21.4	281.667	21.4	245	21.4	243.333	21.4	251.667
21.42	342.5	21.42	208.333	21.42	311.667	21.42	252.5	21.42	255.833	21.42	256.667
21.44	380	21.44	196.667	21.44	308.333	21.44	205.833	21.44	275	21.44	248.333
21.46	358.333	21.46	214.167	21.46	317.5	21.46	211.667	21.46	261.667	21.46	260
21.48	395.833	21.48	231.667	21.48	323.333	21.48	235.833	21.48	243.333	21.48	258.333
21.5	324.167	21.5	221.667	21.5	298.333	21.5	225	21.5	265.833	21.5	274.167
21.52	344.167	21.52	200.833	21.52	325	21.52	252.5	21.52	265.833	21.52	295
21.54	362.5	21.54	205.833	21.54	330.833	21.54	211.667	21.54	255.833	21.54	267.5
21.56	368.333	21.56	225.833	21.56	326.667	21.56	235	21.56	262.5	21.56	263.333
21.58	366.667	21.58	226.667	21.58	313.333	21.58	252.5	21.58	241.667	21.58	270
21.6	347.5	21.6	236.667	21.6	351.667	21.6	245.833	21.6	253.333	21.6	276.667
21.62	361.667	21.62	202.5	21.62	323.333	21.62	223.333	21.62	241.667	21.62	272.5
21.64	357.5	21.64	249.167	21.64	367.5	21.64	228.333	21.64	260.833	21.64	235.833
21.66	367.5	21.66	260.833	21.66	330	21.66	246.667	21.66	271.667	21.66	256.667
21.68	349.167	21.68	214.167	21.68	331.667	21.68	254.167	21.68	260	21.68	276.667
21.7	357.5	21.7	231.667	21.7	298.333	21.7	245.833	21.7	287.5	21.7	275
21.72	338.333	21.72	245.833	21.72	344.167	21.72	245.833	21.72	255	21.72	272.5
21.74	339.167	21.74	246.667	21.74	354.167	21.74	238.333	21.74	239.167	21.74	299.167
21.76	376.667	21.76	257.5	21.76	325	21.76	230	21.76	246.667	21.76	276.667
21.78	337.5	21.78	285	21.78	298.333	21.78	253.333	21.78	251.667	21.78	288.333
21.8	370	21.8	263.333	21.8	311.667	21.8	257.5	21.8	266.667	21.8	271.667
21.82	355.833	21.82	271.667	21.82	320.833	21.82	240	21.82	280	21.82	275.833
21.84	371.667	21.84	276.667	21.84	342.5	21.84	225.833	21.84	250.833	21.84	300
21.86	379.167	21.86	290	21.86	379.167	21.86	233.333	21.86	270.833	21.86	284.167
21.88	391.667	21.88	268.333	21.88	319.167	21.88	258.333	21.88	264.167	21.88	293.333
21.9	370	21.9	287.5	21.9	382.5	21.9	239.167	21.9	285.833	21.9	269.167
21.92	361.667	21.92	286.667	21.92	348.333	21.92	240.833	21.92	259.167	21.92	266.667
21.94	359.167	21.94	255.833	21.94	335.833	21.94	253.333	21.94	280.833	21.94	278.333
21.96	340.833	21.96	263.333	21.96	349.167	21.96	254.167	21.96	252.5	21.96	237.5
21.98	355	21.98	260.833	21.98	342.5	21.98	252.5	21.98	280	21.98	277.5
22	399.167	22	245	22	348.333	22	270	22	315	22	281.667
22.02	398.333	22.02	239.167	22.02	329.167	22.02	234.167	22.02	300.833	22.02	305.833
22.04	415.833	22.04	210	22.04	352.5	22.04	243.333	22.04	307.5	22.04	289.167
22.06	401.667	22.06	254.167	22.06	349.167	22.06	260	22.06	285	22.06	300
22.08	366.667	22.08	230.833	22.08	372.5	22.08	282.5	22.08	294.167	22.08	306.667
22.1	395	22.1	255.833	22.1	330	22.1	244.167	22.1	279.167	22.1	300.833
22.12	376.667	22.12	257.5	22.12	355.833	22.12	282.5	22.12	283.333	22.12	300
22.14	403.333	22.14	234.167	22.14	340	22.14	268.333	22.14	254.167	22.14	299.167
22.16	365.833	22.16	231.667	22.16	360	22.16	275	22.16	301.667	22.16	337.5
22.18	411.667	22.18	233.333	22.18	318.333	22.18	293.333	22.18	281.667	22.18	298.333
22.2	394.167	22.2	241.667	22.2	356.667	22.2	280.833	22.2	275	22.2	275
22.22	398.333	22.22	230.833	22.22	368.333	22.22	245.833	22.22	272.5	22.22	341.667
22.24	400	22.24	217.5	22.24	367.5	22.24	258.333	22.24	280.833	22.24	320.833
22.26	415	22.26	220	22.26	350	22.26	286.667	22.26	294.167	22.26	318.333
22.28	410	22.28	242.5	22.28	362.5	22.28	295	22.28	288.333	22.28	300.833
22.3	430.833	22.3	237.5	22.3	366.667	22.3	269.167	22.3	303.333	22.3	312.5
22.32	397.5	22.32	261.667	22.32	360	22.32	295	22.32	299.167	22.32	314.167
22.34	392.5	22.34	275	22.34	340.833	22.34	265	22.34	298.333	22.34	288.333
22.36	396.667	22.36	243.333	22.36	376.667	22.36	268.333	22.36	297.5	22.36	295
22.38	372.5	22.38	235	22.38	387.5	22.38	272.5	22.38	330.833	22.38	320
22.4	423.333	22.4	245.833	22.4	398.333	22.4	287.5	22.4	283.333	22.4	327.5
22.42	404.167	22.42	235	22.42	392.5	22.42	280	22.42	284.167	22.42	306.667
22.44	438.333	22.44	233.333	22.44	374.167	22.44	274.167	22.44	306.667	22.44	314.167
22.46	431.667	22.46	255	22.46	418.333	22.46	257.5	22.46	271.667	22.46	319.167
22.48	411.667	22.48	254.167	22.48	378.333	22.48	263.333	22.48	313.333	22.48	348.333
22.5	420	22.5	273.333	22.5	398.333	22.5	277.5	22.5	300	22.5	328.333
22.52	416.667	22.52	271.667	22.52	404.167	22.52	288.333	22.52	265.833	22.52	316.667
22.54	445	22.54	249.167	22.54	375.833	22.54	300	22.54	281.667	22.54	343.333
22.56	455.833	22.56	272.5	22.56	380	22.56	277.5	22.56	297.5	22.56	302.5
22.58	464.167	22.58	264.167	22.58	375.833	22.58	295	22.58	306.667	22.58	317.5
22.6	455	22.6	247.5	22.6	381.667	22.6	290.833	22.6	306.667	22.6	316.667
22.62	447.5	22.62	280.833	22.62	411.667	22.62	270	22.62	306.667	22.62	325.833
22.64	450.833	22.64	280.833	22.64	393.333	22.64	292.5	22.64	331.667	22.64	320.833
22.66	455	22.66	261.667	22.66	381.667	22.66	319.167	22.66	301.667	22.66	354.167
22.68	465	22.68	280	22.68	396.667	22.68	309.167	22.68	365	22.68	295.833
22.7	420	22.7	272.5	22.7	381.667	22.7	279.167	22.7	331.667	22.7	317.5
22.72	473.333	22.72	289.167	22.72	414.167	22.72	271.667	22.72	310.833	22.72	321.667
22.74	486.667	22.74	262.5	22.74	373.333	22.74	280	22.74	303.333	22.74	375
22.76	439.167	22.76	277.5	22.76	410	22.76	311.667	22.76	328.333	22.76	352.5
22.78	465.833	22.78	267.5	22.78	404.167	22.78	306.667	22.78	312.5	22.78	332.5
22.8	459.167	22.8	278.333	22.8	425	22.8	287.5	22.8	296.667	22.8	339.167
22.82	488.333	22.82	290	22.82	422.5	22.82	289.167	22.82	299.167	22.82	343.333
22.84	458.333	22.84	313.333	22.84	409.167	22.84	285.833	22.84	322.5	22.84	375.833
22.86	455.833	22.86	282.5	22.86	380	22.86	319.167	22.86	334.167	22.86	345.833
22.88	475.833	22.88	310	22.88	428.333	22.88	280	22.88	305.833	22.88	371.667
22.9	450.833	22.9	291.667	22.9	429.167	22.9	339.167	22.9	320.833	22.9	352.5
22.92	455.833	22.92	319.167	22.92	436.667	22.92	274.167	22.92	305	22.92	380.833
22.94	461.667	22.94	301.667	22.94	425	22.94	280	22.94	304.167	22.94	327.5
22.96	475	22.96	291.667	22.96	429.167	22.96	330	22.96	303.333	22.96	345
22.98	490.833	22.98	308.333	22.98	430.833	22.98	315	22.98	312.5	22.98	372.5
23	470	23	287.5	23	436.667	23	319.167	23	301.667	23	390
23.02	497.5	23.02	314.167	23.02	425	23.02	288.333	23.02	321.667	23.02	360.833
23.04	473.333	23.04	295	23.04	435.833	23.04	303.333	23.04	305.833	23.04	410.833
23.06	490.833	23.06	290	23.06	428.333	23.06	296.667	23.06	347.5	23.06	365
23.08	495	23.08	271.667	23.08	413.333	23.08	294.167	23.08	317.5	23.08	379.167
23.1	484.167	23.1	242.5	23.1	445.833	23.1	305.833	23.1	329.167	23.1	357.5
23.12	530	23.12	280.833	23.12	428.333	23.12	315	23.12	330	23.12	370
23.14	502.5	23.14	264.167	23.14	423.333	23.14	290.833	23.14	335	23.14	371.667
23.16	455	23.16	294.167	23.16	445	23.16	300.833	23.16	325	23.16	358.333
23.18	501.667	23.18	321.667	23.18	426.667	23.18	301.667	23.18	341.667	23.18	405.833
23.2	511.667	23.2	301.667	23.2	417.5	23.2	325.833	23.2	364.167	23.2	371.667
23.22	469.167	23.22	316.667	23.22	449.167	23.22	300.833	23.22	341.667	23.22	385
23.24	520	23.24	339.167	23.24	427.5	23.24	308.333	23.24	335.833	23.24	400.833
23.26	531.667	23.26	324.167	23.26	468.333	23.26	350	23.26	326.667	23.26	407.5
23.28	540	23.28	331.667	23.28	418.333	23.28	311.667	23.28	348.333	23.28	390
23.3	547.5	23.3	284.167	23.3	453.333	23.3	328.333	23.3	375	23.3	375
23.32	550.833	23.32	329.167	23.32	478.333	23.32	280.833	23.32	371.667	23.32	405.833
23.34	550.833	23.34	288.333	23.34	454.167	23.34	300.833	23.34	346.667	23.34	400.833
23.36	536.667	23.36	351.667	23.36	451.667	23.36	312.5	23.36	374.167	23.36	389.167
23.38	536.667	23.38	333.333	23.38	456.667	23.38	280.833	23.38	353.333	23.38	406.667
23.4	565.833	23.4	358.333	23.4	480.833	23.4	300.833	23.4	346.667	23.4	410.833
23.42	539.167	23.42	366.667	23.42	475.833	23.42	336.667	23.42	360.833	23.42	416.667
23.44	537.5	23.44	365	23.44	476.667	23.44	297.5	23.44	359.167	23.44	371.667
23.46	547.5	23.46	385.833	23.46	477.5	23.46	330	23.46	344.167	23.46	410
23.48	552.5	23.48	378.333	23.48	455.833	23.48	345	23.48	344.167	23.48	424.167
23.5	600	23.5	424.167	23.5	440	23.5	323.333	23.5	383.333	23.5	401.667
23.52	572.5	23.52	373.333	23.52	468.333	23.52	318.333	23.52	394.167	23.52	449.167
23.54	595	23.54	395.833	23.54	475	23.54	318.333	23.54	367.5	23.54	396.667
23.56	580	23.56	365.833	23.56	469.167	23.56	301.667	23.56	390	23.56	396.667
23.58	588.333	23.58	365.833	23.58	488.333	23.58	311.667	23.58	370	23.58	433.333
23.6	599.167	23.6	345.833	23.6	485.833	23.6	319.167	23.6	355.833	23.6	409.167
23.62	570	23.62	346.667	23.62	473.333	23.62	326.667	23.62	394.167	23.62	438.333
23.64	591.667	23.64	391.667	23.64	496.667	23.64	320.833	23.64	359.167	23.64	432.5
23.66	549.167	23.66	360	23.66	536.667	23.66	341.667	23.66	400.833	23.66	407.5
23.68	640	23.68	375.833	23.68	471.667	23.68	330.833	23.68	384.167	23.68	420
23.7	599.167	23.7	323.333	23.7	471.667	23.7	325.833	23.7	379.167	23.7	450.833
23.72	592.5	23.72	360.833	23.72	468.333	23.72	375.833	23.72	367.5	23.72	415.833
23.74	612.5	23.74	355	23.74	459.167	23.74	345.833	23.74	381.667	23.74	417.5
23.76	630	23.76	350	23.76	479.167	23.76	345.833	23.76	382.5	23.76	421.667
23.78	642.5	23.78	325	23.78	458.333	23.78	348.333	23.78	430.833	23.78	435
23.8	649.167	23.8	332.5	23.8	521.667	23.8	387.5	23.8	357.5	23.8	458.333
23.82	640	23.82	365	23.82	525	23.82	347.5	23.82	380.833	23.82	395
23.84	640.833	23.84	340	23.84	515	23.84	340	23.84	395.833	23.84	443.333
23.86	641.667	23.86	342.5	23.86	500	23.86	365	23.86	449.167	23.86	446.667
23.88	650.833	23.88	373.333	23.88	488.333	23.88	338.333	23.88	439.167	23.88	470
23.9	635.833	23.9	355	23.9	500	23.9	356.667	23.9	387.5	23.9	448.333
23.92	653.333	23.92	364.167	23.92	488.333	23.92	345.833	23.92	420	23.92	458.333
23.94	675.833	23.94	350.833	23.94	521.667	23.94	365.833	23.94	405	23.94	468.333
23.96	672.5	23.96	406.667	23.96	510	23.96	357.5	23.96	410.833	23.96	420.833
23.98	626.667	23.98	370	23.98	528.333	23.98	356.667	23.98	410.833	23.98	437.5
24	617.5	24	363.333	24	556.667	24	363.333	24	409.167	24	463.333
24.02	665.833	24.02	362.5	24.02	544.167	24.02	340.833	24.02	433.333	24.02	494.167
24.04	670.833	24.04	400	24.04	568.333	24.04	381.667	24.04	388.333	24.04	478.333
24.06	665	24.06	392.5	24.06	524.167	24.06	370	24.06	436.667	24.06	470
24.08	681.667	24.08	389.167	24.08	523.333	24.08	370.833	24.08	396.667	24.08	475
24.1	712.5	24.1	400.833	24.1	574.167	24.1	385	24.1	391.667	24.1	485.833
24.12	698.333	24.12	376.667	24.12	561.667	24.12	379.167	24.12	423.333	24.12	495
24.14	689.167	24.14	410.833	24.14	597.5	24.14	370	24.14	399.167	24.14	482.5
24.16	695	24.16	399.167	24.16	577.5	24.16	425	24.16	450	24.16	493.333
24.18	660	24.18	392.5	24.18	540	24.18	353.333	24.18	426.667	24.18	505.833
24.2	712.5	24.2	392.5	24.2	549.167	24.2	384.167	24.2	438.333	24.2	501.667
24.22	722.5	24.22	409.167	24.22	579.167	24.22	370	24.22	410	24.22	480
24.24	736.667	24.24	386.667	24.24	577.5	24.24	377.5	24.24	444.167	24.24	512.5
24.26	711.667	24.26	429.167	24.26	557.5	24.26	381.667	24.26	445	24.26	487.5
24.28	742.5	24.28	430.833	24.28	595	24.28	385.833	24.28	395	24.28	492.5
24.3	725.833	24.3	403.333	24.3	599.167	24.3	390.833	24.3	430.833	24.3	490.833
24.32	720	24.32	412.5	24.32	568.333	24.32	372.5	24.32	436.667	24.32	529.167
24.34	722.5	24.34	418.333	24.34	615.833	24.34	393.333	24.34	466.667	24.34	520
24.36	730.833	24.36	415.833	24.36	599.167	24.36	408.333	24.36	446.667	24.36	505.833
24.38	741.667	24.38	402.5	24.38	533.333	24.38	386.667	24.38	437.5	24.38	482.5
24.4	759.167	24.4	447.5	24.4	606.667	24.4	385	24.4	435.833	24.4	549.167
24.42	748.333	24.42	429.167	24.42	615.833	24.42	409.167	24.42	470.833	24.42	566.667
24.44	760.833	24.44	422.5	24.44	584.167	24.44	400	24.44	447.5	24.44	503.333
24.46	695.833	24.46	428.333	24.46	570.833	24.46	432.5	24.46	465	24.46	538.333
24.48	834.167	24.48	445.833	24.48	590.833	24.48	415.833	24.48	421.667	24.48	521.667
24.5	754.167	24.5	450.833	24.5	590.833	24.5	415.833	24.5	460.833	24.5	515
24.52	795	24.52	413.333	24.52	594.167	24.52	440	24.52	452.5	24.52	521.667
24.54	770.833	24.54	399.167	24.54	588.333	24.54	436.667	24.54	470.833	24.54	566.667
24.56	767.5	24.56	461.667	24.56	595.833	24.56	420.833	24.56	458.333	24.56	544.167
24.58	803.333	24.58	447.5	24.58	648.333	24.58	437.5	24.58	468.333	24.58	530
24.6	804.167	24.6	475	24.6	620.833	24.6	444.167	24.6	453.333	24.6	510.833
24.62	809.167	24.62	431.667	24.62	605	24.62	433.333	24.62	467.5	24.62	537.5
24.64	845.833	24.64	446.667	24.64	638.333	24.64	420	24.64	465	24.64	558.333
24.66	836.667	24.66	469.167	24.66	668.333	24.66	444.167	24.66	474.167	24.66	570
24.68	854.167	24.68	455.833	24.68	630	24.68	381.667	24.68	494.167	24.68	578.333
24.7	820.833	24.7	466.667	24.7	638.333	24.7	453.333	24.7	485	24.7	585
24.72	819.167	24.72	435.833	24.72	667.5	24.72	443.333	24.72	491.667	24.72	590.833
24.74	811.667	24.74	494.167	24.74	651.667	24.74	434.167	24.74	501.667	24.74	593.333
24.76	816.667	24.76	485.833	24.76	655	24.76	447.5	24.76	502.5	24.76	566.667
24.78	825.833	24.78	485	24.78	645.833	24.78	410.833	24.78	515.833	24.78	542.5
24.8	890.833	24.8	526.667	24.8	667.5	24.8	459.167	24.8	498.333	24.8	595.833
24.82	806.667	24.82	505.833	24.82	669.167	24.82	434.167	24.82	497.5	24.82	587.5
24.84	857.5	24.84	478.333	24.84	650.833	24.84	457.5	24.84	486.667	24.84	602.5
24.86	823.333	24.86	470	24.86	668.333	24.86	460.833	24.86	484.167	24.86	570.833
24.88	870	24.88	505.833	24.88	653.333	24.88	475	24.88	522.5	24.88	580
24.9	870.833	24.9	463.333	24.9	660	24.9	459.167	24.9	510	24.9	566.667
24.92	873.333	24.92	475	24.92	630.833	24.92	447.5	24.92	473.333	24.92	594.167
24.94	850	24.94	501.667	24.94	658.333	24.94	426.667	24.94	501.667	24.94	588.333
24.96	839.167	24.96	447.5	24.96	714.167	24.96	463.333	24.96	467.5	24.96	615.833
24.98	860	24.98	510.833	24.98	652.5	24.98	492.5	24.98	508.333	24.98	550.833
25	855	25	530.833	25	654.167	25	455.833	25	496.667	25	614.167
25.02	865	25.02	490	25.02	711.667	25.02	443.333	25.02	509.167	25.02	586.667
25.04	876.667	25.04	543.333	25.04	684.167	25.04	487.5	25.04	500.833	25.04	621.667
25.06	888.333	25.06	539.167	25.06	683.333	25.06	442.5	25.06	501.667	25.06	598.333
25.08	855.833	25.08	554.167	25.08	702.5	25.08	465.833	25.08	490	25.08	624.167
25.1	891.667	25.1	504.167	25.1	665	25.1	498.333	25.1	470	25.1	588.333
25.12	888.333	25.12	495.833	25.12	670	25.12	464.167	25.12	522.5	25.12	588.333
25.14	875.833	25.14	469.167	25.14	720	25.14	440.833	25.14	542.5	25.14	630
25.16	905	25.16	489.167	25.16	686.667	25.16	447.5	25.16	545	25.16	608.333
25.18	892.5	25.18	520	25.18	671.667	25.18	468.333	25.18	484.167	25.18	598.333
25.2	940	25.2	528.333	25.2	659.167	25.2	463.333	25.2	543.333	25.2	618.333
25.22	883.333	25.22	509.167	25.22	628.333	25.22	490.833	25.22	520.833	25.22	670
25.24	903.333	25.24	493.333	25.24	696.667	25.24	469.167	25.24	500.833	25.24	600.833
25.26	891.667	25.26	488.333	25.26	669.167	25.26	481.667	25.26	510.833	25.26	650
25.28	916.667	25.28	483.333	25.28	675	25.28	495.833	25.28	534.167	25.28	639.167
25.3	885.833	25.3	522.5	25.3	709.167	25.3	527.5	25.3	497.5	25.3	639.167
25.32	949.167	25.32	505.833	25.32	696.667	25.32	476.667	25.32	496.667	25.32	616.667
25.34	918.333	25.34	495.833	25.34	725.833	25.34	464.167	25.34	545	25.34	631.667
25.36	996.667	25.36	550	25.36	660	25.36	490.833	25.36	545.833	25.36	675
25.38	937.5	25.38	504.167	25.38	672.5	25.38	450	25.38	535.833	25.38	650
25.4	941.667	25.4	518.333	25.4	663.333	25.4	488.333	25.4	525.833	25.4	621.667
25.42	936.667	25.42	523.333	25.42	672.5	25.42	500.833	25.42	528.333	25.42	630.833
25.44	935.833	25.44	509.167	25.44	710	25.44	519.167	25.44	533.333	25.44	652.5
25.46	937.5	25.46	506.667	25.46	690.833	25.46	517.5	25.46	510	25.46	626.667
25.48	971.667	25.48	513.333	25.48	711.667	25.48	470.833	25.48	530	25.48	617.5
25.5	912.5	25.5	522.5	25.5	687.5	25.5	481.667	25.5	543.333	25.5	605.833
25.52	980	25.52	520.833	25.52	713.333	25.52	486.667	25.52	517.5	25.52	670
25.54	955.833	25.54	545	25.54	670	25.54	492.5	25.54	535	25.54	681.667
25.56	917.5	25.56	508.333	25.56	664.167	25.56	489.167	25.56	523.333	25.56	655.833
25.58	909.167	25.58	528.333	25.58	727.5	25.58	469.167	25.58	522.5	25.58	622.5
25.6	985.833	25.6	538.333	25.6	705	25.6	481.667	25.6	526.667	25.6	642.5
25.62	927.5	25.62	514.167	25.62	729.167	25.62	497.5	25.62	504.167	25.62	645.833
25.64	945.833	25.64	510.833	25.64	694.167	25.64	488.333	25.64	557.5	25.64	648.333
25.66	898.333	25.66	528.333	25.66	693.333	25.66	484.167	25.66	520	25.66	632.5
25.68	948.333	25.68	527.5	25.68	705	25.68	489.167	25.68	523.333	25.68	599.167
25.7	962.5	25.7	504.167	25.7	671.667	25.7	475.833	25.7	522.5	25.7	642.5
25.72	956.667	25.72	529.167	25.72	665	25.72	503.333	25.72	563.333	25.72	650.833
25.74	920	25.74	521.667	25.74	698.333	25.74	461.667	25.74	510.833	25.74	615.833
25.76	931.667	25.76	545.833	25.76	691.667	25.76	505.833	25.76	527.5	25.76	663.333
25.78	954.167	25.78	524.167	25.78	660.833	25.78	486.667	25.78	511.667	25.78	605
25.8	905.833	25.8	511.667	25.8	673.333	25.8	450	25.8	500.833	25.8	651.667
25.82	939.167	25.82	555.833	25.82	679.167	25.82	447.5	25.82	527.5	25.82	664.167
25.84	920.833	25.84	486.667	25.84	681.667	25.84	465	25.84	466.667	25.84	593.333
25.86	894.167	25.86	515.833	25.86	665.833	25.86	490.833	25.86	538.333	25.86	627.5
25.88	921.667	25.88	498.333	25.88	642.5	25.88	490	25.88	477.5	25.88	644.167
25.9	905	25.9	546.667	25.9	648.333	25.9	442.5	25.9	522.5	25.9	651.667
25.92	935.833	25.92	552.5	25.92	648.333	25.92	472.5	25.92	478.333	25.92	665.833
25.94	901.667	25.94	540.833	25.94	656.667	25.94	469.167	25.94	515	25.94	646.667
25.96	865.833	25.96	548.333	25.96	693.333	25.96	466.667	25.96	530.833	25.96	620
25.98	867.5	25.98	530.833	25.98	653.333	25.98	465	25.98	517.5	25.98	609.167
26	932.5	26	534.167	26	691.667	26	439.167	26	491.667	26	609.167
26.02	849.167	26.02	543.333	26.02	621.667	26.02	466.667	26.02	480	26.02	635.833
26.04	896.667	26.04	544.167	26.04	665	26.04	471.667	26.04	487.5	26.04	587.5
26.06	899.167	26.06	526.667	26.06	600	26.06	497.5	26.06	495.833	26.06	596.667
26.08	901.667	26.08	503.333	26.08	674.167	26.08	419.167	26.08	485.833	26.08	590.833
26.1	908.333	26.1	545.833	26.1	635	26.1	437.5	26.1	505.833	26.1	602.5
26.12	881.667	26.12	514.167	26.12	651.667	26.12	453.333	26.12	524.167	26.12	637.5
26.14	910.833	26.14	518.333	26.14	636.667	26.14	450.833	26.14	460.833	26.14	612.5
26.16	879.167	26.16	519.167	26.16	607.5	26.16	475.833	26.16	486.667	26.16	602.5
26.18	899.167	26.18	490	26.18	652.5	26.18	469.167	26.18	464.167	26.18	610
26.2	854.167	26.2	496.667	26.2	645	26.2	471.667	26.2	449.167	26.2	570.833
26.22	825.833	26.22	518.333	26.22	614.167	26.22	445.833	26.22	470	26.22	614.167
26.24	855	26.24	507.5	26.24	605	26.24	399.167	26.24	471.667	26.24	603.333
26.26	860.833	26.26	483.333	26.26	583.333	26.26	405.833	26.26	465.833	26.26	590
26.28	802.5	26.28	524.167	26.28	589.167	26.28	435	26.28	465.833	26.28	609.167
26.3	812.5	26.3	510.833	26.3	619.167	26.3	427.5	26.3	465	26.3	602.5
26.32	810	26.32	487.5	26.32	578.333	26.32	421.667	26.32	509.167	26.32	552.5
26.34	815.833	26.34	477.5	26.34	617.5	26.34	415.833	26.34	476.667	26.34	551.667
26.36	788.333	26.36	452.5	26.36	597.5	26.36	384.167	26.36	490.833	26.36	576.667
26.38	825	26.38	474.167	26.38	610.833	26.38	414.167	26.38	470.833	26.38	534.167
26.4	786.667	26.4	436.667	26.4	575	26.4	425.833	26.4	464.167	26.4	579.167
26.42	773.333	26.42	504.167	26.42	565	26.42	408.333	26.42	429.167	26.42	545
26.44	789.167	26.44	462.5	26.44	617.5	26.44	449.167	26.44	447.5	26.44	519.167
26.46	764.167	26.46	478.333	26.46	550	26.46	377.5	26.46	452.5	26.46	504.167
26.48	823.333	26.48	446.667	26.48	561.667	26.48	394.167	26.48	423.333	26.48	527.5
26.5	745	26.5	479.167	26.5	528.333	26.5	393.333	26.5	412.5	26.5	539.167
26.52	775	26.52	445.833	26.52	580.833	26.52	414.167	26.52	399.167	26.52	528.333
26.54	775.833	26.54	425	26.54	519.167	26.54	379.167	26.54	431.667	26.54	512.5
26.56	789.167	26.56	469.167	26.56	532.5	26.56	394.167	26.56	420	26.56	509.167
26.58	758.333	26.58	427.5	26.58	546.667	26.58	372.5	26.58	390	26.58	510
26.6	759.167	26.6	450.833	26.6	554.167	26.6	390	26.6	419.167	26.6	513.333
26.62	748.333	26.62	417.5	26.62	516.667	26.62	362.5	26.62	361.667	26.62	500
26.64	691.667	26.64	415.833	26.64	486.667	26.64	372.5	26.64	419.167	26.64	498.333
26.66	704.167	26.66	397.5	26.66	501.667	26.66	349.167	26.66	397.5	26.66	450
26.68	701.667	26.68	421.667	26.68	498.333	26.68	397.5	26.68	412.5	26.68	485.833
26.7	707.5	26.7	407.5	26.7	520	26.7	377.5	26.7	375.833	26.7	465.833
26.72	670	26.72	390.833	26.72	489.167	26.72	380.833	26.72	403.333	26.72	475.833
26.74	702.5	26.74	417.5	26.74	490.833	26.74	367.5	26.74	381.667	26.74	500.833
26.76	606.667	26.76	405	26.76	501.667	26.76	347.5	26.76	378.333	26.76	474.167
26.78	609.167	26.78	416.667	26.78	512.5	26.78	335.833	26.78	405	26.78	481.667
26.8	680	26.8	435.833	26.8	520.833	26.8	351.667	26.8	354.167	26.8	457.5
26.82	644.167	26.82	430.833	26.82	443.333	26.82	335.833	26.82	365	26.82	456.667
26.84	659.167	26.84	405.833	26.84	508.333	26.84	338.333	26.84	340	26.84	433.333
26.86	630.833	26.86	375.833	26.86	503.333	26.86	350.833	26.86	344.167	26.86	445
26.88	612.5	26.88	405	26.88	471.667	26.88	330.833	26.88	354.167	26.88	448.333
26.9	629.167	26.9	372.5	26.9	437.5	26.9	332.5	26.9	350	26.9	432.5
26.92	615.833	26.92	377.5	26.92	486.667	26.92	368.333	26.92	350.833	26.92	433.333
26.94	591.667	26.94	377.5	26.94	461.667	26.94	321.667	26.94	359.167	26.94	431.667
26.96	595	26.96	373.333	26.96	486.667	26.96	294.167	26.96	356.667	26.96	410
26.98	531.667	26.98	356.667	26.98	450.833	26.98	281.667	26.98	332.5	26.98	391.667
27	566.667	27	377.5	27	438.333	27	309.167	27	356.667	27	426.667
27.02	572.5	27.02	374.167	27.02	423.333	27.02	312.5	27.02	323.333	27.02	410.833
27.04	576.667	27.04	395.833	27.04	407.5	27.04	296.667	27.04	331.667	27.04	440
27.06	574.167	27.06	355	27.06	462.5	27.06	306.667	27.06	327.5	27.06	393.333
27.08	562.5	27.08	365	27.08	436.667	27.08	310.833	27.08	345.833	27.08	387.5
27.1	534.167	27.1	364.167	27.1	418.333	27.1	282.5	27.1	339.167	27.1	375
27.12	527.5	27.12	353.333	27.12	450	27.12	300.833	27.12	341.667	27.12	400.833
27.14	537.5	27.14	331.667	27.14	420	27.14	313.333	27.14	309.167	27.14	349.167
27.16	561.667	27.16	341.667	27.16	437.5	27.16	289.167	27.16	315.833	27.16	365.833
27.18	521.667	27.18	355	27.18	394.167	27.18	295.833	27.18	308.333	27.18	400.833
27.2	508.333	27.2	339.167	27.2	399.167	27.2	282.5	27.2	309.167	27.2	355
27.22	525	27.22	336.667	27.22	378.333	27.22	277.5	27.22	297.5	27.22	325
27.24	490.833	27.24	304.167	27.24	397.5	27.24	276.667	27.24	305	27.24	375
27.26	475	27.26	345	27.26	410.833	27.26	258.333	27.26	289.167	27.26	368.333
27.28	466.667	27.28	358.333	27.28	393.333	27.28	258.333	27.28	298.333	27.28	352.5
27.3	492.5	27.3	297.5	27.3	357.5	27.3	273.333	27.3	303.333	27.3	356.667
27.32	460	27.32	303.333	27.32	375	27.32	246.667	27.32	273.333	27.32	334.167
27.34	472.5	27.34	299.167	27.34	364.167	27.34	282.5	27.34	284.167	27.34	367.5
27.36	475.833	27.36	315.833	27.36	378.333	27.36	251.667	27.36	286.667	27.36	310
27.38	484.167	27.38	325.833	27.38	354.167	27.38	235.833	27.38	270.833	27.38	318.333
27.4	449.167	27.4	295	27.4	358.333	27.4	258.333	27.4	271.667	27.4	299.167
27.42	473.333	27.42	321.667	27.42	340.833	27.42	233.333	27.42	280.833	27.42	308.333
27.44	393.333	27.44	306.667	27.44	334.167	27.44	258.333	27.44	267.5	27.44	312.5
27.46	439.167	27.46	278.333	27.46	312.5	27.46	245	27.46	255	27.46	345
27.48	425.833	27.48	285.833	27.48	385	27.48	254.167	27.48	244.167	27.48	322.5
27.5	416.667	27.5	272.5	27.5	325.833	27.5	238.333	27.5	234.167	27.5	283.333
27.52	405	27.52	279.167	27.52	353.333	27.52	230	27.52	233.333	27.52	296.667
27.54	416.667	27.54	247.5	27.54	305.833	27.54	233.333	27.54	258.333	27.54	288.333
27.56	401.667	27.56	273.333	27.56	305.833	27.56	230.833	27.56	265	27.56	291.667
27.58	411.667	27.58	290.833	27.58	336.667	27.58	196.667	27.58	235.833	27.58	303.333
27.6	365.833	27.6	261.667	27.6	293.333	27.6	243.333	27.6	230.833	27.6	284.167
27.62	384.167	27.62	237.5	27.62	313.333	27.62	216.667	27.62	234.167	27.62	287.5
27.64	395.833	27.64	271.667	27.64	315.833	27.64	215	27.64	250	27.64	291.667
27.66	377.5	27.66	261.667	27.66	324.167	27.66	214.167	27.66	225.833	27.66	271.667
27.68	366.667	27.68	239.167	27.68	302.5	27.68	231.667	27.68	227.5	27.68	269.167
27.7	367.5	27.7	278.333	27.7	319.167	27.7	200	27.7	220	27.7	300.833
27.72	365.833	27.72	230	27.72	274.167	27.72	204.167	27.72	223.333	27.72	258.333
27.74	355	27.74	237.5	27.74	285.833	27.74	208.333	27.74	211.667	27.74	260
27.76	342.5	27.76	259.167	27.76	290.833	27.76	191.667	27.76	255	27.76	266.667
27.78	342.5	27.78	280	27.78	274.167	27.78	194.167	27.78	215	27.78	257.5
27.8	337.5	27.8	270.833	27.8	275.833	27.8	196.667	27.8	195	27.8	253.333
27.82	361.667	27.82	272.5	27.82	287.5	27.82	205.833	27.82	206.667	27.82	247.5
27.84	324.167	27.84	275.833	27.84	268.333	27.84	177.5	27.84	190	27.84	239.167
27.86	317.5	27.86	306.667	27.86	260.833	27.86	193.333	27.86	191.667	27.86	236.667
27.88	335	27.88	277.5	27.88	280	27.88	162.5	27.88	214.167	27.88	245
27.9	300	27.9	320	27.9	246.667	27.9	181.667	27.9	203.333	27.9	239.167
27.92	309.167	27.92	255.833	27.92	240.833	27.92	178.333	27.92	214.167	27.92	249.167
27.94	317.5	27.94	305	27.94	255	27.94	181.667	27.94	188.333	27.94	253.333
27.96	325.833	27.96	252.5	27.96	261.667	27.96	194.167	27.96	210.833	27.96	239.167
27.98	325	27.98	264.167	27.98	259.167	27.98	174.167	27.98	193.333	27.98	242.5
28	301.667	28	235	28	216.667	28	182.5	28	203.333	28	210
28.02	288.333	28.02	215.833	28.02	240	28.02	158.333	28.02	187.5	28.02	250
28.04	312.5	28.04	203.333	28.04	247.5	28.04	176.667	28.04	169.167	28.04	234.167
28.06	284.167	28.06	206.667	28.06	252.5	28.06	171.667	28.06	171.667	28.06	201.667
28.08	277.5	28.08	227.5	28.08	232.5	28.08	167.5	28.08	166.667	28.08	200
28.1	313.333	28.1	219.167	28.1	239.167	28.1	180	28.1	188.333	28.1	190.833
28.12	267.5	28.12	197.5	28.12	255	28.12	164.167	28.12	183.333	28.12	243.333
28.14	281.667	28.14	215	28.14	224.167	28.14	158.333	28.14	159.167	28.14	198.333
28.16	266.667	28.16	170.833	28.16	228.333	28.16	151.667	28.16	175	28.16	194.167
28.18	250	28.18	192.5	28.18	230	28.18	150	28.18	169.167	28.18	191.667
28.2	245	28.2	186.667	28.2	231.667	28.2	173.333	28.2	158.333	28.2	197.5
28.22	260	28.22	200	28.22	220.833	28.22	176.667	28.22	160.833	28.22	218.333
28.24	245.833	28.24	201.667	28.24	204.167	28.24	150	28.24	181.667	28.24	194.167
28.26	251.667	28.26	160.833	28.26	202.5	28.26	117.5	28.26	180.833	28.26	170.833
28.28	276.667	28.28	169.167	28.28	206.667	28.28	172.5	28.28	164.167	28.28	198.333
28.3	219.167	28.3	183.333	28.3	213.333	28.3	143.333	28.3	159.167	28.3	186.667
28.32	240	28.32	172.5	28.32	203.333	28.32	153.333	28.32	166.667	28.32	185.833
28.34	243.333	28.34	146.667	28.34	209.167	28.34	161.667	28.34	157.5	28.34	195
28.36	234.167	28.36	182.5	28.36	207.5	28.36	150.833	28.36	155.833	28.36	177.5
28.38	225.833	28.38	170.833	28.38	212.5	28.38	150.833	28.38	157.5	28.38	202.5
28.4	241.667	28.4	173.333	28.4	194.167	28.4	126.667	28.4	150	28.4	174.167
28.42	242.5	28.42	156.667	28.42	197.5	28.42	135	28.42	163.333	28.42	190.833
28.44	233.333	28.44	162.5	28.44	200.833	28.44	144.167	28.44	143.333	28.44	177.5
28.46	231.667	28.46	166.667	28.46	177.5	28.46	142.5	28.46	136.667	28.46	180.833
28.48	204.167	28.48	162.5	28.48	185.833	28.48	165	28.48	139.167	28.48	166.667
28.5	220.833	28.5	157.5	28.5	181.667	28.5	140.833	28.5	153.333	28.5	175.833
28.52	223.333	28.52	146.667	28.52	175.833	28.52	136.667	28.52	152.5	28.52	154.167
28.54	213.333	28.54	162.5	28.54	203.333	28.54	125	28.54	164.167	28.54	152.5
28.56	220.833	28.56	156.667	28.56	188.333	28.56	143.333	28.56	152.5	28.56	145
28.58	200	28.58	154.167	28.58	187.5	28.58	141.667	28.58	137.5	28.58	156.667
28.6	205	28.6	150	28.6	188.333	28.6	120	28.6	145.833	28.6	170.833
28.62	218.333	28.62	170.833	28.62	193.333	28.62	140.833	28.62	150.833	28.62	154.167
28.64	200	28.64	135	28.64	177.5	28.64	132.5	28.64	136.667	28.64	144.167
28.66	221.667	28.66	160	28.66	195	28.66	117.5	28.66	148.333	28.66	150
28.68	205.833	28.68	133.333	28.68	182.5	28.68	135	28.68	136.667	28.68	157.5
28.7	213.333	28.7	155.833	28.7	150	28.7	135	28.7	123.333	28.7	157.5
28.72	175.833	28.72	155	28.72	180.833	28.72	129.167	28.72	146.667	28.72	159.167
28.74	190.833	28.74	157.5	28.74	189.167	28.74	119.167	28.74	138.333	28.74	162.5
28.76	166.667	28.76	158.333	28.76	168.333	28.76	128.333	28.76	127.5	28.76	141.667
28.78	200.833	28.78	152.5	28.78	165.833	28.78	128.333	28.78	140.833	28.78	128.333
28.8	199.167	28.8	142.5	28.8	165.833	28.8	110	28.8	124.167	28.8	115
28.82	176.667	28.82	138.333	28.82	177.5	28.82	123.333	28.82	142.5	28.82	140.833
28.84	180.833	28.84	147.5	28.84	168.333	28.84	142.5	28.84	133.333	28.84	154.167
28.86	200	28.86	152.5	28.86	151.667	28.86	136.667	28.86	126.667	28.86	134.167
28.88	178.333	28.88	145.833	28.88	163.333	28.88	105	28.88	121.667	28.88	147.5
28.9	183.333	28.9	150.833	28.9	175	28.9	119.167	28.9	121.667	28.9	155
28.92	175.833	28.92	149.167	28.92	148.333	28.92	129.167	28.92	138.333	28.92	132.5
28.94	175.833	28.94	136.667	28.94	143.333	28.94	127.5	28.94	126.667	28.94	141.667
28.96	164.167	28.96	147.5	28.96	131.667	28.96	115.833	28.96	131.667	28.96	128.333
28.98	169.167	28.98	133.333	28.98	153.333	28.98	110	28.98	120	28.98	133.333
29	160.833	29	138.333	29	165.833	29	105	29	120.833	29	120.833
29.02	167.5	29.02	149.167	29.02	156.667	29.02	123.333	29.02	120	29.02	122.5
29.04	162.5	29.04	168.333	29.04	130.833	29.04	105	29.04	121.667	29.04	131.667
29.06	168.333	29.06	189.167	29.06	140	29.06	110.833	29.06	146.667	29.06	141.667
29.08	172.5	29.08	195	29.08	143.333	29.08	118.333	29.08	136.667	29.08	127.5
29.1	151.667	29.1	181.667	29.1	141.667	29.1	121.667	29.1	127.5	29.1	136.667
29.12	154.167	29.12	186.667	29.12	160	29.12	89.1667	29.12	98.3333	29.12	122.5
29.14	168.333	29.14	207.5	29.14	139.167	29.14	120.833	29.14	105	29.14	132.5
29.16	165.833	29.16	215.833	29.16	146.667	29.16	100.833	29.16	133.333	29.16	119.167
29.18	175.833	29.18	198.333	29.18	148.333	29.18	114.167	29.18	131.667	29.18	131.667
29.2	154.167	29.2	210.833	29.2	131.667	29.2	115	29.2	145	29.2	125.833
29.22	172.5	29.22	206.667	29.22	160.833	29.22	105	29.22	132.5	29.22	126.667
29.24	170	29.24	205.833	29.24	136.667	29.24	103.333	29.24	125	29.24	126.667
29.26	124.167	29.26	184.167	29.26	118.333	29.26	99.1667	29.26	103.333	29.26	120.833
29.28	148.333	29.28	170	29.28	135.833	29.28	105.833	29.28	126.667	29.28	124.167
29.3	154.167	29.3	155	29.3	150	29.3	109.167	29.3	107.5	29.3	119.167
29.32	169.167	29.32	135	29.32	125	29.32	104.167	29.32	120	29.32	125
29.34	125.833	29.34	138.333	29.34	138.333	29.34	112.5	29.34	107.5	29.34	136.667
29.36	167.5	29.36	129.167	29.36	136.667	29.36	104.167	29.36	92.5	29.36	114.167
29.38	147.5	29.38	105.833	29.38	130.833	29.38	95.8333	29.38	125.833	29.38	112.5
29.4	161.667	29.4	97.5	29.4	140.833	29.4	115	29.4	112.5	29.4	106.667
29.42	155.833	29.42	117.5	29.42	136.667	29.42	103.333	29.42	95.8333	29.42	130.833
29.44	150.833	29.44	130	29.44	120.833	29.44	108.333	29.44	120	29.44	115
29.46	131.667	29.46	115.833	29.46	130	29.46	85	29.46	101.667	29.46	97.5
29.48	145	29.48	114.167	29.48	134.167	29.48	105.833	29.48	110	29.48	115
29.5	142.5	29.5	122.5	29.5	131.667	29.5	94.1667	29.5	107.5	29.5	112.5
29.52	156.667	29.52	121.667	29.52	125.833	29.52	95	29.52	109.167	29.52	118.333
29.54	131.667	29.54	113.333	29.54	115	29.54	96.6667	29.54	104.167	29.54	101.667
29.56	142.5	29.56	129.167	29.56	130	29.56	106.667	29.56	104.167	29.56	98.3333
29.58	122.5	29.58	123.333	29.58	134.167	29.58	110.833	29.58	100.833	29.58	125.833
29.6	145	29.6	120	29.6	125.833	29.6	96.6667	29.6	110.833	29.6	112.5
29.62	139.167	29.62	127.5	29.62	125.833	29.62	106.667	29.62	100.833	29.62	109.167
29.64	130	29.64	130	29.64	132.5	29.64	106.667	29.64	106.667	29.64	95.8333
29.66	135.833	29.66	120	29.66	97.5	29.66	102.5	29.66	90.8333	29.66	86.6667
29.68	136.667	29.68	125.833	29.68	110.833	29.68	89.1667	29.68	110	29.68	102.5
29.7	128.333	29.7	122.5	29.7	132.5	29.7	84.1667	29.7	108.333	29.7	116.667
29.72	145	29.72	131.667	29.72	130.833	29.72	85	29.72	110	29.72	113.333
29.74	126.667	29.74	128.333	29.74	123.333	29.74	90.8333	29.74	90.8333	29.74	100
29.76	132.5	29.76	139.167	29.76	117.5	29.76	98.3333	29.76	95.8333	29.76	101.667
29.78	128.333	29.78	121.667	29.78	104.167	29.78	72.5	29.78	102.5	29.78	120.833
29.8	135	29.8	133.333	29.8	122.5	29.8	81.6667	29.8	106.667	29.8	101.667
29.82	121.667	29.82	117.5	29.82	130.833	29.82	92.5	29.82	98.3333	29.82	100
29.84	138.333	29.84	110	29.84	120.833	29.84	97.5	29.84	105	29.84	105.833
29.86	113.333	29.86	105	29.86	121.667	29.86	73.3333	29.86	100	29.86	120.833
29.88	135	29.88	120.833	29.88	121.667	29.88	79.1667	29.88	101.667	29.88	110.833
29.9	121.667	29.9	88.3333	29.9	95.8333	29.9	79.1667	29.9	102.5	29.9	94.1667
29.92	130.833	29.92	112.5	29.92	117.5	29.92	98.3333	29.92	90	29.92	101.667
29.94	131.667	29.94	111.667	29.94	96.6667	29.94	79.1667	29.94	80.8333	29.94	109.167
29.96	119.167	29.96	101.667	29.96	124.167	29.96	73.3333	29.96	87.5	29.96	94.1667
29.98	125.833	29.98	97.5	29.98	100.833	29.98	69.1667	29.98	93.3333	29.98	95
30	104.167	30	116.667	30	117.5	30	80.8333	30	95	30	74.1667
30.02	121.667	30.02	106.667	30.02	100.833	30.02	95.8333	30.02	90.8333	30.02	93.3333
30.04	105	30.04	110	30.04	98.3333	30.04	82.5	30.04	86.6667	30.04	93.3333
30.06	130.833	30.06	107.5	30.06	115	30.06	95	30.06	100.833	30.06	100.833
30.08	122.5	30.08	88.3333	30.08	104.167	30.08	90.8333	30.08	100.833	30.08	95
30.1	122.5	30.1	104.167	30.1	91.6667	30.1	90	30.1	77.5	30.1	97.5
30.12	117.5	30.12	107.5	30.12	119.167	30.12	82.5	30.12	87.5	30.12	76.6667
30.14	97.5	30.14	120.833	30.14	110.833	30.14	88.3333	30.14	112.5	30.14	97.5
30.16	115	30.16	90	30.16	101.667	30.16	75	30.16	83.3333	30.16	77.5
30.18	112.5	30.18	91.6667	30.18	110	30.18	65.8333	30.18	85.8333	30.18	89.1667
30.2	124.167	30.2	99.1667	30.2	110	30.2	88.3333	30.2	77.5	30.2	100.833
30.22	120.833	30.22	86.6667	30.22	100.833	30.22	95.8333	30.22	88.3333	30.22	94.1667
30.24	115	30.24	78.3333	30.24	105	30.24	69.1667	30.24	85	30.24	106.667
30.26	120.833	30.26	87.5	30.26	125	30.26	70	30.26	98.3333	30.26	93.3333
30.28	125	30.28	90	30.28	123.333	30.28	80.8333	30.28	78.3333	30.28	91.6667
30.3	95	30.3	85	30.3	109.167	30.3	65	30.3	76.6667	30.3	86.6667
30.32	122.5	30.32	80	30.32	110.833	30.32	88.3333	30.32	79.1667	30.32	80
30.34	114.167	30.34	83.3333	30.34	98.3333	30.34	75.8333	30.34	92.5	30.34	75.8333
30.36	115	30.36	76.6667	30.36	111.667	30.36	90	30.36	78.3333	30.36	77.5
30.38	111.667	30.38	91.6667	30.38	89.1667	30.38	71.6667	30.38	101.667	30.38	95.8333
30.4	88.3333	30.4	83.3333	30.4	115.833	30.4	72.5	30.4	82.5	30.4	78.3333
30.42	102.5	30.42	91.6667	30.42	111.667	30.42	70	30.42	91.6667	30.42	88.3333
30.44	103.333	30.44	93.3333	30.44	109.167	30.44	87.5	30.44	90.8333	30.44	95.8333
30.46	107.5	30.46	74.1667	30.46	103.333	30.46	65.8333	30.46	68.3333	30.46	92.5
30.48	99.1667	30.48	86.6667	30.48	85	30.48	72.5	30.48	86.6667	30.48	89.1667
30.5	93.3333	30.5	75.8333	30.5	96.6667	30.5	64.1667	30.5	64.1667	30.5	73.3333
30.52	110	30.52	74.1667	30.52	96.6667	30.52	76.6667	30.52	82.5	30.52	90.8333
30.54	105	30.54	83.3333	30.54	100	30.54	75.8333	30.54	90.8333	30.54	89.1667
30.56	105	30.56	85.8333	30.56	112.5	30.56	68.3333	30.56	104.167	30.56	88.3333
30.58	105	30.58	101.667	30.58	93.3333	30.58	85.8333	30.58	103.333	30.58	108.333
30.6	110.833	30.6	95	30.6	108.333	30.6	80	30.6	84.1667	30.6	83.3333
30.62	105	30.62	81.6667	30.62	81.6667	30.62	75.8333	30.62	79.1667	30.62	84.1667
30.64	113.333	30.64	81.6667	30.64	100.833	30.64	74.1667	30.64	75.8333	30.64	93.3333
30.66	83.3333	30.66	72.5	30.66	92.5	30.66	70.8333	30.66	82.5	30.66	77.5
30.68	101.667	30.68	99.1667	30.68	112.5	30.68	89.1667	30.68	75	30.68	86.6667
30.7	107.5	30.7	97.5	30.7	94.1667	30.7	70	30.7	89.1667	30.7	75
30.72	90	30.72	101.667	30.72	92.5	30.72	75	30.72	88.3333	30.72	80.8333
30.74	98.3333	30.74	90.8333	30.74	89.1667	30.74	68.3333	30.74	86.6667	30.74	74.1667
30.76	92.5	30.76	103.333	30.76	92.5	30.76	84.1667	30.76	81.6667	30.76	79.1667
30.78	87.5	30.78	74.1667	30.78	89.1667	30.78	95	30.78	94.1667	30.78	68.3333
30.8	97.5	30.8	91.6667	30.8	100	30.8	72.5	30.8	68.3333	30.8	81.6667
30.82	105.833	30.82	91.6667	30.82	85	30.82	67.5	30.82	82.5	30.82	84.1667
30.84	93.3333	30.84	83.3333	30.84	90.8333	30.84	69.1667	30.84	86.6667	30.84	98.3333
30.86	94.1667	30.86	87.5	30.86	91.6667	30.86	80.8333	30.86	72.5	30.86	87.5
30.88	93.3333	30.88	80.8333	30.88	87.5	30.88	81.6667	30.88	80	30.88	82.5
30.9	84.1667	30.9	99.1667	30.9	76.6667	30.9	58.3333	30.9	68.3333	30.9	74.1667
30.92	102.5	30.92	100.833	30.92	89.1667	30.92	74.1667	30.92	63.3333	30.92	99.1667
30.94	103.333	30.94	104.167	30.94	89.1667	30.94	65.8333	30.94	80	30.94	90.8333
30.96	105	30.96	103.333	30.96	88.3333	30.96	77.5	30.96	90	30.96	75.8333
30.98	94.1667	30.98	90	30.98	81.6667	30.98	67.5	30.98	75	30.98	85.8333
31	81.6667	31	111.667	31	91.6667	31	64.1667	31	77.5	31	90.8333
31.02	79.1667	31.02	99.1667	31.02	70	31.02	84.1667	31.02	73.3333	31.02	74.1667
31.04	97.5	31.04	88.3333	31.04	90.8333	31.04	76.6667	31.04	76.6667	31.04	65.8333
31.06	95	31.06	110	31.06	104.167	31.06	75.8333	31.06	88.3333	31.06	74.1667
31.08	95.8333	31.08	116.667	31.08	72.5	31.08	65.8333	31.08	72.5	31.08	69.1667
31.1	97.5	31.1	88.3333	31.1	90	31.1	65	31.1	95	31.1	75
31.12	105.833	31.12	101.667	31.12	89.1667	31.12	65.8333	31.12	79.1667	31.12	66.6667
31.14	86.6667	31.14	90.8333	31.14	80	31.14	74.1667	31.14	74.1667	31.14	70.8333
31.16	95	31.16	95	31.16	85.8333	31.16	80	31.16	86.6667	31.16	66.6667
31.18	98.3333	31.18	82.5	31.18	80.8333	31.18	68.3333	31.18	73.3333	31.18	87.5
31.2	85.8333	31.2	70.8333	31.2	84.1667	31.2	71.6667	31.2	60.8333	31.2	77.5
31.22	70.8333	31.22	67.5	31.22	86.6667	31.22	68.3333	31.22	75	31.22	64.1667
31.24	85	31.24	79.1667	31.24	82.5	31.24	69.1667	31.24	77.5	31.24	80.8333
31.26	83.3333	31.26	78.3333	31.26	79.1667	31.26	74.1667	31.26	65.8333	31.26	85
31.28	101.667	31.28	58.3333	31.28	100	31.28	67.5	31.28	71.6667	31.28	80
31.3	91.6667	31.3	79.1667	31.3	86.6667	31.3	72.5	31.3	81.6667	31.3	81.6667
31.32	116.667	31.32	64.1667	31.32	75.8333	31.32	64.1667	31.32	76.6667	31.32	70
31.34	90.8333	31.34	65	31.34	74.1667	31.34	68.3333	31.34	68.3333	31.34	70.8333
31.36	105	31.36	88.3333	31.36	85	31.36	65	31.36	75.8333	31.36	75
31.38	92.5	31.38	78.3333	31.38	83.3333	31.38	67.5	31.38	66.6667	31.38	71.6667
31.4	90.8333	31.4	75.8333	31.4	85.8333	31.4	71.6667	31.4	72.5	31.4	63.3333
31.42	109.167	31.42	82.5	31.42	66.6667	31.42	71.6667	31.42	78.3333	31.42	65.8333
31.44	91.6667	31.44	66.6667	31.44	77.5	31.44	74.1667	31.44	69.1667	31.44	90.8333
31.46	83.3333	31.46	90	31.46	90	31.46	73.3333	31.46	70	31.46	71.6667
31.48	62.5	31.48	90	31.48	86.6667	31.48	70.8333	31.48	70	31.48	75.8333
31.5	90.8333	31.5	79.1667	31.5	72.5	31.5	68.3333	31.5	79.1667	31.5	71.6667
31.52	86.6667	31.52	104.167	31.52	73.3333	31.52	61.6667	31.52	83.3333	31.52	76.6667
31.54	89.1667	31.54	87.5	31.54	87.5	31.54	69.1667	31.54	80.8333	31.54	70.8333
31.56	96.6667	31.56	98.3333	31.56	88.3333	31.56	65.8333	31.56	67.5	31.56	71.6667
31.58	75	31.58	68.3333	31.58	81.6667	31.58	58.3333	31.58	71.6667	31.58	79.1667
31.6	95	31.6	85.8333	31.6	78.3333	31.6	65	31.6	74.1667	31.6	64.1667
31.62	80.8333	31.62	85.8333	31.62	74.1667	31.62	53.3333	31.62	80.8333	31.62	70.8333
31.64	98.3333	31.64	80	31.64	77.5	31.64	59.1667	31.64	80.8333	31.64	67.5
31.66	72.5	31.66	79.1667	31.66	80	31.66	72.5	31.66	70.8333	31.66	79.1667
31.68	90	31.68	79.1667	31.68	68.3333	31.68	65.8333	31.68	66.6667	31.68	65
31.7	94.1667	31.7	94.1667	31.7	90.8333	31.7	73.3333	31.7	66.6667	31.7	80
31.72	91.6667	31.72	75.8333	31.72	85	31.72	79.1667	31.72	67.5	31.72	58.3333
31.74	90	31.74	75.8333	31.74	89.1667	31.74	74.1667	31.74	67.5	31.74	65
31.76	94.1667	31.76	73.3333	31.76	83.3333	31.76	77.5	31.76	57.5	31.76	69.1667
31.78	79.1667	31.78	70.8333	31.78	67.5	31.78	55.8333	31.78	66.6667	31.78	70.8333
31.8	87.5	31.8	80	31.8	88.3333	31.8	72.5	31.8	59.1667	31.8	70.8333
31.82	83.3333	31.82	90	31.82	80.8333	31.82	75	31.82	65.8333	31.82	51.6667
31.84	84.1667	31.84	73.3333	31.84	78.3333	31.84	60.8333	31.84	51.6667	31.84	70.8333
31.86	83.3333	31.86	85	31.86	65.8333	31.86	58.3333	31.86	65	31.86	65
31.88	87.5	31.88	102.5	31.88	71.6667	31.88	66.6667	31.88	80.8333	31.88	65.8333
31.9	77.5	31.9	85	31.9	65.8333	31.9	60	31.9	65	31.9	67.5
31.92	80	31.92	76.6667	31.92	66.6667	31.92	71.6667	31.92	65.8333	31.92	61.6667
31.94	80	31.94	78.3333	31.94	75.8333	31.94	62.5	31.94	65	31.94	76.6667
31.96	70.8333	31.96	82.5	31.96	77.5	31.96	64.1667	31.96	68.3333	31.96	70.8333
31.98	71.6667	31.98	79.1667	31.98	81.6667	31.98	70	31.98	62.5	31.98	72.5
32	59.1667	32	70	32	69.1667	32	55	32	73.3333	32	70.8333
32.02	79.1667	32.02	72.5	32.02	76.6667	32.02	68.3333	32.02	58.3333	32.02	75.8333
32.04	85.8333	32.04	69.1667	32.04	78.3333	32.04	74.1667	32.04	59.1667	32.04	76.6667
32.06	79.1667	32.06	72.5	32.06	72.5	32.06	60.8333	32.06	57.5	32.06	67.5
32.08	89.1667	32.08	65	32.08	71.6667	32.08	74.1667	32.08	72.5	32.08	70.8333
32.1	81.6667	32.1	76.6667	32.1	67.5	32.1	59.1667	32.1	80	32.1	64.1667
32.12	78.3333	32.12	79.1667	32.12	81.6667	32.12	57.5	32.12	68.3333	32.12	59.1667
32.14	95.8333	32.14	70.8333	32.14	60.8333	32.14	62.5	32.14	79.1667	32.14	59.1667
32.16	73.3333	32.16	60.8333	32.16	74.1667	32.16	58.3333	32.16	70	32.16	76.6667
32.18	85.8333	32.18	70.8333	32.18	79.1667	32.18	62.5	32.18	63.3333	32.18	55.8333
32.2	85.8333	32.2	65	32.2	82.5	32.2	58.3333	32.2	64.1667	32.2	82.5
32.22	76.6667	32.22	63.3333	32.22	99.1667	32.22	55	32.22	76.6667	32.22	53.3333
32.24	73.3333	32.24	60.8333	32.24	79.1667	32.24	63.3333	32.24	70.8333	32.24	56.6667
32.26	75	32.26	59.1667	32.26	81.6667	32.26	63.3333	32.26	65.8333	32.26	68.3333
32.28	66.6667	32.28	70	32.28	63.3333	32.28	58.3333	32.28	58.3333	32.28	66.6667
32.3	80	32.3	60.8333	32.3	66.6667	32.3	60	32.3	77.5	32.3	56.6667
32.32	85	32.32	60	32.32	68.3333	32.32	62.5	32.32	67.5	32.32	62.5
32.34	73.3333	32.34	69.1667	32.34	76.6667	32.34	70	32.34	80.8333	32.34	75.8333
32.36	67.5	32.36	60	32.36	75.8333	32.36	60.8333	32.36	73.3333	32.36	72.5
32.38	79.1667	32.38	50.8333	32.38	74.1667	32.38	55	32.38	57.5	32.38	63.3333
32.4	84.1667	32.4	60.8333	32.4	84.1667	32.4	66.6667	32.4	77.5	32.4	65
32.42	75.8333	32.42	64.1667	32.42	75.8333	32.42	67.5	32.42	75	32.42	63.3333
32.44	90	32.44	68.3333	32.44	85.8333	32.44	58.3333	32.44	81.6667	32.44	80.8333
32.46	69.1667	32.46	56.6667	32.46	79.1667	32.46	70.8333	32.46	66.6667	32.46	63.3333
32.48	80.8333	32.48	77.5	32.48	76.6667	32.48	62.5	32.48	59.1667	32.48	65.8333
32.5	70.8333	32.5	63.3333	32.5	58.3333	32.5	58.3333	32.5	78.3333	32.5	50.8333
32.52	77.5	32.52	51.6667	32.52	77.5	32.52	61.6667	32.52	59.1667	32.52	64.1667
32.54	69.1667	32.54	67.5	32.54	78.3333	32.54	58.3333	32.54	84.1667	32.54	56.6667
32.56	68.3333	32.56	78.3333	32.56	76.6667	32.56	61.6667	32.56	61.6667	32.56	78.3333
32.58	81.6667	32.58	72.5	32.58	79.1667	32.58	58.3333	32.58	49.1667	32.58	72.5
32.6	74.1667	32.6	73.3333	32.6	75.8333	32.6	49.1667	32.6	72.5	32.6	77.5
32.62	78.3333	32.62	85.8333	32.62	71.6667	32.62	59.1667	32.62	63.3333	32.62	65.8333
32.64	66.6667	32.64	50	32.64	70.8333	32.64	56.6667	32.64	62.5	32.64	54.1667
32.66	74.1667	32.66	57.5	32.66	74.1667	32.66	55.8333	32.66	75.8333	32.66	62.5
32.68	70.8333	32.68	80.8333	32.68	74.1667	32.68	58.3333	32.68	67.5	32.68	65
32.7	61.6667	32.7	85	32.7	88.3333	32.7	71.6667	32.7	67.5	32.7	57.5
32.72	67.5	32.72	86.6667	32.72	60.8333	32.72	56.6667	32.72	72.5	32.72	68.3333
32.74	73.3333	32.74	67.5	32.74	74.1667	32.74	70	32.74	65	32.74	53.3333
32.76	60.8333	32.76	80.8333	32.76	71.6667	32.76	62.5	32.76	70	32.76	60.8333
32.78	83.3333	32.78	80.8333	32.78	78.3333	32.78	60	32.78	58.3333	32.78	58.3333
32.8	71.6667	32.8	92.5	32.8	75.8333	32.8	59.1667	32.8	67.5	32.8	68.3333
32.82	62.5	32.82	95	32.82	76.6667	32.82	56.6667	32.82	68.3333	32.82	59.1667
32.84	75	32.84	85	32.84	70.8333	32.84	56.6667	32.84	65.8333	32.84	59.1667
32.86	97.5	32.86	66.6667	32.86	75.8333	32.86	55	32.86	74.1667	32.86	70
32.88	77.5	32.88	82.5	32.88	77.5	32.88	65.8333	32.88	73.3333	32.88	72.5
32.9	68.3333	32.9	75.8333	32.9	77.5	32.9	52.5	32.9	56.6667	32.9	74.1667
32.92	68.3333	32.92	75.8333	32.92	74.1667	32.92	61.6667	32.92	58.3333	32.92	74.1667
32.94	74.1667	32.94	76.6667	32.94	80.8333	32.94	59.1667	32.94	67.5	32.94	61.6667
32.96	84.1667	32.96	89.1667	32.96	75.8333	32.96	58.3333	32.96	61.6667	32.96	60.8333
32.98	58.3333	32.98	74.1667	32.98	66.6667	32.98	61.6667	32.98	54.1667	32.98	73.3333
33	90.8333	33	62.5	33	82.5	33	64.1667	33	65.8333	33	65
33.02	72.5	33.02	69.1667	33.02	80	33.02	67.5	33.02	68.3333	33.02	63.3333
33.04	57.5	33.04	76.6667	33.04	70.8333	33.04	73.3333	33.04	73.3333	33.04	75
33.06	71.6667	33.06	57.5	33.06	74.1667	33.06	62.5	33.06	75	33.06	67.5
33.08	72.5	33.08	59.1667	33.08	79.1667	33.08	62.5	33.08	64.1667	33.08	71.6667
33.1	68.3333	33.1	67.5	33.1	59.1667	33.1	60	33.1	61.6667	33.1	62.5
33.12	79.1667	33.12	56.6667	33.12	70.8333	33.12	47.5	33.12	78.3333	33.12	77.5
33.14	61.6667	33.14	63.3333	33.14	76.6667	33.14	59.1667	33.14	79.1667	33.14	56.6667
33.16	67.5	33.16	59.1667	33.16	72.5	33.16	55.8333	33.16	75	33.16	62.5
33.18	57.5	33.18	60	33.18	70	33.18	70	33.18	71.6667	33.18	72.5
33.2	64.1667	33.2	58.3333	33.2	59.1667	33.2	65.8333	33.2	65	33.2	64.1667
33.22	67.5	33.22	61.6667	33.22	68.3333	33.22	70.8333	33.22	63.3333	33.22	65.8333
33.24	85.8333	33.24	71.6667	33.24	63.3333	33.24	55.8333	33.24	60	33.24	58.3333
33.26	58.3333	33.26	72.5	33.26	73.3333	33.26	75	33.26	67.5	33.26	78.3333
33.28	80	33.28	58.3333	33.28	79.1667	33.28	77.5	33.28	60.8333	33.28	55
33.3	68.3333	33.3	66.6667	33.3	82.5	33.3	70	33.3	70.8333	33.3	71.6667
33.32	76.6667	33.32	69.1667	33.32	75.8333	33.32	58.3333	33.32	68.3333	33.32	80.8333
33.34	61.6667	33.34	66.6667	33.34	85	33.34	68.3333	33.34	70.8333	33.34	88.3333
33.36	72.5	33.36	65	33.36	77.5	33.36	75.8333	33.36	67.5	33.36	64.1667
33.38	60	33.38	62.5	33.38	77.5	33.38	59.1667	33.38	76.6667	33.38	64.1667
33.4	72.5	33.4	69.1667	33.4	91.6667	33.4	67.5	33.4	65.8333	33.4	62.5
33.42	56.6667	33.42	70.8333	33.42	67.5	33.42	75	33.42	80.8333	33.42	74.1667
33.44	55	33.44	83.3333	33.44	82.5	33.44	80	33.44	80	33.44	65.8333
33.46	62.5	33.46	78.3333	33.46	80.8333	33.46	56.6667	33.46	62.5	33.46	76.6667
33.48	65.8333	33.48	74.1667	33.48	72.5	33.48	82.5	33.48	67.5	33.48	87.5
33.5	67.5	33.5	75.8333	33.5	72.5	33.5	69.1667	33.5	75.8333	33.5	93.3333
33.52	64.1667	33.52	96.6667	33.52	61.6667	33.52	75.8333	33.52	69.1667	33.52	73.3333
33.54	83.3333	33.54	85.8333	33.54	79.1667	33.54	81.6667	33.54	79.1667	33.54	65
33.56	73.3333	33.56	76.6667	33.56	83.3333	33.56	77.5	33.56	77.5	33.56	80.8333
33.58	78.3333	33.58	82.5	33.58	83.3333	33.58	80	33.58	75	33.58	73.3333
33.6	71.6667	33.6	80	33.6	90	33.6	78.3333	33.6	77.5	33.6	77.5
33.62	67.5	33.62	75.8333	33.62	85.8333	33.62	70.8333	33.62	91.6667	33.62	83.3333
33.64	62.5	33.64	74.1667	33.64	93.3333	33.64	83.3333	33.64	96.6667	33.64	88.3333
33.66	77.5	33.66	65	33.66	85	33.66	84.1667	33.66	79.1667	33.66	78.3333
33.68	61.6667	33.68	68.3333	33.68	75	33.68	88.3333	33.68	77.5	33.68	98.3333
33.7	70.8333	33.7	60.8333	33.7	85.8333	33.7	76.6667	33.7	75	33.7	83.3333
33.72	62.5	33.72	50	33.72	74.1667	33.72	86.6667	33.72	76.6667	33.72	96.6667
33.74	59.1667	33.74	54.1667	33.74	70	33.74	82.5	33.74	95.8333	33.74	85
33.76	82.5	33.76	55	33.76	73.3333	33.76	85	33.76	70.8333	33.76	64.1667
33.78	63.3333	33.78	56.6667	33.78	75	33.78	85	33.78	83.3333	33.78	87.5
33.8	70	33.8	55	33.8	93.3333	33.8	85	33.8	78.3333	33.8	90
33.82	64.1667	33.82	60.8333	33.82	81.6667	33.82	75.8333	33.82	75	33.82	88.3333
33.84	61.6667	33.84	58.3333	33.84	82.5	33.84	88.3333	33.84	84.1667	33.84	80
33.86	55.8333	33.86	57.5	33.86	72.5	33.86	75	33.86	88.3333	33.86	75
33.88	66.6667	33.88	62.5	33.88	65.8333	33.88	84.1667	33.88	100.833	33.88	80.8333
33.9	63.3333	33.9	54.1667	33.9	81.6667	33.9	92.5	33.9	90	33.9	84.1667
33.92	70	33.92	56.6667	33.92	84.1667	33.92	77.5	33.92	69.1667	33.92	72.5
33.94	62.5	33.94	44.1667	33.94	80	33.94	90	33.94	82.5	33.94	67.5
33.96	77.5	33.96	41.6667	33.96	80.8333	33.96	87.5	33.96	101.667	33.96	84.1667
33.98	61.6667	33.98	48.3333	33.98	84.1667	33.98	79.1667	33.98	88.3333	33.98	90
34	79.1667	34	61.6667	34	73.3333	34	87.5	34	70	34	87.5
34.02	54.1667	34.02	50.8333	34.02	80.8333	34.02	86.6667	34.02	80.8333	34.02	91.6667
34.04	69.1667	34.04	44.1667	34.04	76.6667	34.04	90	34.04	70	34.04	82.5
34.06	62.5	34.06	54.1667	34.06	86.6667	34.06	100.833	34.06	87.5	34.06	84.1667
34.08	59.1667	34.08	45	34.08	96.6667	34.08	81.6667	34.08	75.8333	34.08	102.5
34.1	83.3333	34.1	52.5	34.1	75.8333	34.1	90	34.1	79.1667	34.1	89.1667
34.12	71.6667	34.12	44.1667	34.12	72.5	34.12	90	34.12	82.5	34.12	92.5
34.14	60.8333	34.14	61.6667	34.14	67.5	34.14	86.6667	34.14	72.5	34.14	71.6667
34.16	63.3333	34.16	52.5	34.16	97.5	34.16	80.8333	34.16	70.8333	34.16	89.1667
34.18	71.6667	34.18	62.5	34.18	79.1667	34.18	81.6667	34.18	80.8333	34.18	85
34.2	68.3333	34.2	49.1667	34.2	77.5	34.2	76.6667	34.2	78.3333	34.2	85
34.22	51.6667	34.22	65.8333	34.22	64.1667	34.22	90.8333	34.22	78.3333	34.22	95
34.24	68.3333	34.24	52.5	34.24	65.8333	34.24	84.1667	34.24	74.1667	34.24	84.1667
34.26	72.5	34.26	59.1667	34.26	75.8333	34.26	108.333	34.26	72.5	34.26	86.6667
34.28	75	34.28	51.6667	34.28	81.6667	34.28	71.6667	34.28	90	34.28	80.8333
34.3	63.3333	34.3	58.3333	34.3	72.5	34.3	85.8333	34.3	87.5	34.3	90.8333
34.32	73.3333	34.32	45	34.32	85	34.32	88.3333	34.32	73.3333	34.32	94.1667
34.34	70.8333	34.34	67.5	34.34	80.8333	34.34	92.5	34.34	84.1667	34.34	104.167
34.36	83.3333	34.36	49.1667	34.36	79.1667	34.36	88.3333	34.36	72.5	34.36	83.3333
34.38	50	34.38	53.3333	34.38	83.3333	34.38	89.1667	34.38	91.6667	34.38	74.1667
34.4	60	34.4	55.8333	34.4	73.3333	34.4	80	34.4	85.8333	34.4	93.3333
34.42	62.5	34.42	68.3333	34.42	75.8333	34.42	86.6667	34.42	79.1667	34.42	96.6667
34.44	73.3333	34.44	70	34.44	75	34.44	100	34.44	83.3333	34.44	90.8333
34.46	66.6667	34.46	69.1667	34.46	88.3333	34.46	89.1667	34.46	72.5	34.46	80
34.48	53.3333	34.48	57.5	34.48	85	34.48	95.8333	34.48	80.8333	34.48	83.3333
34.5	58.3333	34.5	62.5	34.5	70	34.5	95	34.5	73.3333	34.5	77.5
34.52	74.1667	34.52	84.1667	34.52	75	34.52	82.5	34.52	78.3333	34.52	86.6667
34.54	60.8333	34.54	70	34.54	71.6667	34.54	95.8333	34.54	77.5	34.54	86.6667
34.56	62.5	34.56	80	34.56	76.6667	34.56	81.6667	34.56	83.3333	34.56	110
34.58	65	34.58	65	34.58	75.8333	34.58	90	34.58	76.6667	34.58	91.6667
34.6	55	34.6	63.3333	34.6	73.3333	34.6	86.6667	34.6	85.8333	34.6	85
34.62	50.8333	34.62	53.3333	34.62	75.8333	34.62	70	34.62	70.8333	34.62	91.6667
34.64	59.1667	34.64	53.3333	34.64	70	34.64	89.1667	34.64	63.3333	34.64	85
34.66	67.5	34.66	58.3333	34.66	71.6667	34.66	82.5	34.66	70.8333	34.66	80.8333
34.68	61.6667	34.68	60.8333	34.68	83.3333	34.68	84.1667	34.68	69.1667	34.68	90
34.7	61.6667	34.7	46.6667	34.7	66.6667	34.7	81.6667	34.7	79.1667	34.7	93.3333
34.72	67.5	34.72	66.6667	34.72	79.1667	34.72	67.5	34.72	73.3333	34.72	82.5
34.74	60	34.74	47.5	34.74	79.1667	34.74	78.3333	34.74	83.3333	34.74	80.8333
34.76	67.5	34.76	45.8333	34.76	80.8333	34.76	84.1667	34.76	74.1667	34.76	80
34.78	64.1667	34.78	50.8333	34.78	73.3333	34.78	75	34.78	80	34.78	73.3333
34.8	64.1667	34.8	37.5	34.8	70.8333	34.8	73.3333	34.8	74.1667	34.8	75
34.82	77.5	34.82	54.1667	34.82	65	34.82	92.5	34.82	69.1667	34.82	75
34.84	65.8333	34.84	42.5	34.84	55	34.84	81.6667	34.84	71.6667	34.84	89.1667
34.86	63.3333	34.86	46.6667	34.86	74.1667	34.86	64.1667	34.86	75.8333	34.86	70
34.88	57.5	34.88	47.5	34.88	53.3333	34.88	73.3333	34.88	91.6667	34.88	72.5
34.9	65.8333	34.9	43.3333	34.9	67.5	34.9	73.3333	34.9	87.5	34.9	77.5
34.92	55	34.92	45.8333	34.92	65	34.92	70.8333	34.92	75.8333	34.92	65
34.94	70.8333	34.94	59.1667	34.94	73.3333	34.94	64.1667	34.94	80.8333	34.94	91.6667
34.96	68.3333	34.96	55.8333	34.96	64.1667	34.96	84.1667	34.96	73.3333	34.96	70.8333
34.98	62.5	34.98	36.6667	34.98	88.3333	34.98	76.6667	34.98	65.8333	34.98	66.6667
35	60	35	52.5	35	72.5	35	70	35	57.5	35	78.3333
35.02	47.5	35.02	70.8333	35.02	65.8333	35.02	58.3333	35.02	75.8333	35.02	72.5
35.04	58.3333	35.04	56.6667	35.04	72.5	35.04	63.3333	35.04	61.6667	35.04	75.8333
35.06	60	35.06	52.5	35.06	71.6667	35.06	76.6667	35.06	75.8333	35.06	79.1667
35.08	62.5	35.08	67.5	35.08	64.1667	35.08	77.5	35.08	69.1667	35.08	75.8333
35.1	57.5	35.1	67.5	35.1	68.3333	35.1	55.8333	35.1	74.1667	35.1	72.5
35.12	60	35.12	57.5	35.12	70.8333	35.12	54.1667	35.12	70	35.12	75.8333
35.14	62.5	35.14	62.5	35.14	65	35.14	77.5	35.14	70.8333	35.14	59.1667
35.16	59.1667	35.16	56.6667	35.16	68.3333	35.16	70	35.16	72.5	35.16	60
35.18	55.8333	35.18	59.1667	35.18	82.5	35.18	53.3333	35.18	66.6667	35.18	58.3333
35.2	67.5	35.2	60	35.2	73.3333	35.2	80.8333	35.2	65.8333	35.2	60.8333
35.22	56.6667	35.22	71.6667	35.22	81.6667	35.22	60	35.22	72.5	35.22	76.6667
35.24	52.5	35.24	57.5	35.24	60.8333	35.24	60	35.24	82.5	35.24	77.5
35.26	65.8333	35.26	70	35.26	78.3333	35.26	70	35.26	69.1667	35.26	62.5
35.28	60	35.28	55	35.28	67.5	35.28	64.1667	35.28	55	35.28	73.3333
35.3	65	35.3	60	35.3	76.6667	35.3	74.1667	35.3	62.5	35.3	80
35.32	70	35.32	53.3333	35.32	69.1667	35.32	67.5	35.32	67.5	35.32	60.8333
35.34	67.5	35.34	60.8333	35.34	68.3333	35.34	58.3333	35.34	56.6667	35.34	76.6667
35.36	47.5	35.36	66.6667	35.36	68.3333	35.36	75	35.36	57.5	35.36	65.8333
35.38	68.3333	35.38	60.8333	35.38	63.3333	35.38	76.6667	35.38	73.3333	35.38	76.6667
35.4	59.1667	35.4	56.6667	35.4	70	35.4	51.6667	35.4	54.1667	35.4	74.1667
35.42	56.6667	35.42	63.3333	35.42	75.8333	35.42	76.6667	35.42	65.8333	35.42	77.5
35.44	60.8333	35.44	44.1667	35.44	50	35.44	68.3333	35.44	68.3333	35.44	59.1667
35.46	64.1667	35.46	60.8333	35.46	71.6667	35.46	65	35.46	71.6667	35.46	80.8333
35.48	69.1667	35.48	64.1667	35.48	59.1667	35.48	63.3333	35.48	60	35.48	63.3333
35.5	60	35.5	54.1667	35.5	70.8333	35.5	77.5	35.5	69.1667	35.5	80
35.52	67.5	35.52	59.1667	35.52	62.5	35.52	81.6667	35.52	70.8333	35.52	75.8333
35.54	73.3333	35.54	62.5	35.54	59.1667	35.54	73.3333	35.54	63.3333	35.54	67.5
35.56	75	35.56	43.3333	35.56	67.5	35.56	75	35.56	69.1667	35.56	75
35.58	56.6667	35.58	56.6667	35.58	70.8333	35.58	75.8333	35.58	66.6667	35.58	65
35.6	54.1667	35.6	40.8333	35.6	61.6667	35.6	62.5	35.6	68.3333	35.6	65.8333
35.62	57.5	35.62	44.1667	35.62	78.3333	35.62	62.5	35.62	71.6667	35.62	64.1667
35.64	66.6667	35.64	34.1667	35.64	65	35.64	75	35.64	52.5	35.64	63.3333
35.66	71.6667	35.66	51.6667	35.66	75.8333	35.66	65	35.66	69.1667	35.66	80.8333
35.68	65	35.68	37.5	35.68	64.1667	35.68	56.6667	35.68	66.6667	35.68	70
35.7	60	35.7	43.3333	35.7	60.8333	35.7	70	35.7	60.8333	35.7	70
35.72	70.8333	35.72	44.1667	35.72	62.5	35.72	80.8333	35.72	68.3333	35.72	70.8333
35.74	59.1667	35.74	39.1667	35.74	68.3333	35.74	69.1667	35.74	71.6667	35.74	60.8333
35.76	59.1667	35.76	61.6667	35.76	67.5	35.76	60.8333	35.76	65	35.76	70.8333
35.78	46.6667	35.78	59.1667	35.78	55.8333	35.78	54.1667	35.78	67.5	35.78	68.3333
35.8	59.1667	35.8	47.5	35.8	67.5	35.8	51.6667	35.8	58.3333	35.8	61.6667
35.82	48.3333	35.82	43.3333	35.82	49.1667	35.82	69.1667	35.82	75	35.82	69.1667
35.84	60	35.84	46.6667	35.84	54.1667	35.84	63.3333	35.84	63.3333	35.84	60
35.86	68.3333	35.86	56.6667	35.86	59.1667	35.86	65.8333	35.86	56.6667	35.86	60.8333
35.88	57.5	35.88	53.3333	35.88	82.5	35.88	60.8333	35.88	74.1667	35.88	62.5
35.9	60.8333	35.9	45	35.9	65.8333	35.9	55	35.9	72.5	35.9	75.8333
35.92	66.6667	35.92	41.6667	35.92	61.6667	35.92	70.8333	35.92	71.6667	35.92	69.1667
35.94	65	35.94	46.6667	35.94	62.5	35.94	63.3333	35.94	61.6667	35.94	71.6667
35.96	52.5	35.96	40.8333	35.96	56.6667	35.96	63.3333	35.96	66.6667	35.96	53.3333
35.98	51.6667	35.98	49.1667	35.98	63.3333	35.98	64.1667	35.98	62.5	35.98	64.1667
36	50	36	35.8333	36	85.8333	36	58.3333	36	70.8333	36	52.5
36.02	55	36.02	42.5	36.02	73.3333	36.02	48.3333	36.02	58.3333	36.02	54.1667
36.04	58.3333	36.04	40.8333	36.04	60.8333	36.04	60.8333	36.04	50.8333	36.04	75
36.06	65.8333	36.06	52.5	36.06	55.8333	36.06	69.1667	36.06	73.3333	36.06	53.3333
36.08	61.6667	36.08	55.8333	36.08	65	36.08	55	36.08	50	36.08	66.6667
36.1	60	36.1	40.8333	36.1	64.1667	36.1	51.6667	36.1	60.8333	36.1	68.3333
36.12	48.3333	36.12	41.6667	36.12	58.3333	36.12	60.8333	36.12	54.1667	36.12	75.8333
36.14	56.6667	36.14	43.3333	36.14	57.5	36.14	54.1667	36.14	61.6667	36.14	75
36.16	54.1667	36.16	60.8333	36.16	70	36.16	53.3333	36.16	48.3333	36.16	53.3333
36.18	58.3333	36.18	55.8333	36.18	67.5	36.18	70	36.18	68.3333	36.18	52.5
36.2	64.1667	36.2	35	36.2	55	36.2	50	36.2	60	36.2	65
36.22	65.8333	36.22	35.8333	36.22	53.3333	36.22	58.3333	36.22	61.6667	36.22	61.6667
36.24	66.6667	36.24	50.8333	36.24	58.3333	36.24	55.8333	36.24	60	36.24	70.8333
36.26	57.5	36.26	48.3333	36.26	59.1667	36.26	51.6667	36.26	63.3333	36.26	60.8333
36.28	53.3333	36.28	51.6667	36.28	45.8333	36.28	59.1667	36.28	65	36.28	60
36.3	45.8333	36.3	60.8333	36.3	81.6667	36.3	60.8333	36.3	73.3333	36.3	52.5
36.32	65.8333	36.32	48.3333	36.32	70.8333	36.32	60.8333	36.32	65.8333	36.32	61.6667
36.34	50.8333	36.34	54.1667	36.34	54.1667	36.34	58.3333	36.34	69.1667	36.34	68.3333
36.36	59.1667	36.36	43.3333	36.36	66.6667	36.36	59.1667	36.36	57.5	36.36	59.1667
36.38	49.1667	36.38	52.5	36.38	69.1667	36.38	60	36.38	60	36.38	59.1667
36.4	60	36.4	43.3333	36.4	53.3333	36.4	60.8333	36.4	61.6667	36.4	51.6667
36.42	65.8333	36.42	49.1667	36.42	58.3333	36.42	64.1667	36.42	58.3333	36.42	64.1667
36.44	62.5	36.44	44.1667	36.44	53.3333	36.44	68.3333	36.44	65	36.44	69.1667
36.46	55	36.46	56.6667	36.46	55.8333	36.46	44.1667	36.46	58.3333	36.46	67.5
36.48	48.3333	36.48	56.6667	36.48	58.3333	36.48	67.5	36.48	65	36.48	55.8333
36.5	64.1667	36.5	78.3333	36.5	61.6667	36.5	60.8333	36.5	53.3333	36.5	64.1667
36.52	55	36.52	60	36.52	65	36.52	55.8333	36.52	66.6667	36.52	60
36.54	50	36.54	66.6667	36.54	55.8333	36.54	65.8333	36.54	68.3333	36.54	58.3333
36.56	60.8333	36.56	75	36.56	53.3333	36.56	64.1667	36.56	57.5	36.56	70
36.58	48.3333	36.58	80	36.58	70	36.58	65	36.58	60.8333	36.58	69.1667
36.6	53.3333	36.6	69.1667	36.6	64.1667	36.6	52.5	36.6	57.5	36.6	55.8333
36.62	50.8333	36.62	67.5	36.62	58.3333	36.62	55	36.62	52.5	36.62	66.6667
36.64	50	36.64	68.3333	36.64	74.1667	36.64	56.6667	36.64	58.3333	36.64	64.1667
36.66	63.3333	36.66	75	36.66	60.8333	36.66	50	36.66	65	36.66	60.8333
36.68	47.5	36.68	70.8333	36.68	48.3333	36.68	60	36.68	62.5	36.68	54.1667
36.7	49.1667	36.7	72.5	36.7	69.1667	36.7	60.8333	36.7	47.5	36.7	65
36.72	60	36.72	74.1667	36.72	57.5	36.72	62.5	36.72	69.1667	36.72	65.8333
36.74	51.6667	36.74	64.1667	36.74	58.3333	36.74	60	36.74	55	36.74	55.8333
36.76	59.1667	36.76	69.1667	36.76	65.8333	36.76	55	36.76	64.1667	36.76	54.1667
36.78	50	36.78	75.8333	36.78	57.5	36.78	64.1667	36.78	55.8333	36.78	66.6667
36.8	58.3333	36.8	70.8333	36.8	60	36.8	65	36.8	45.8333	36.8	68.3333
36.82	55.8333	36.82	60	36.82	65	36.82	60.8333	36.82	64.1667	36.82	54.1667
36.84	57.5	36.84	75.8333	36.84	51.6667	36.84	70	36.84	60.8333	36.84	62.5
36.86	53.3333	36.86	57.5	36.86	60.8333	36.86	55	36.86	62.5	36.86	56.6667
36.88	61.6667	36.88	67.5	36.88	54.1667	36.88	49.1667	36.88	54.1667	36.88	62.5
36.9	55	36.9	71.6667	36.9	54.1667	36.9	57.5	36.9	62.5	36.9	75
36.92	44.1667	36.92	66.6667	36.92	63.3333	36.92	60	36.92	55	36.92	65.8333
36.94	55	36.94	64.1667	36.94	64.1667	36.94	44.1667	36.94	62.5	36.94	59.1667
36.96	58.3333	36.96	60	36.96	63.3333	36.96	58.3333	36.96	57.5	36.96	71.6667
36.98	56.6667	36.98	57.5	36.98	50.8333	36.98	50	36.98	50	36.98	49.1667
37	60.8333	37	50	37	56.6667	37	47.5	37	66.6667	37	50.8333
37.02	61.6667	37.02	73.3333	37.02	63.3333	37.02	70	37.02	53.3333	37.02	54.1667
37.04	60.8333	37.04	48.3333	37.04	55	37.04	51.6667	37.04	62.5	37.04	58.3333
37.06	50	37.06	61.6667	37.06	64.1667	37.06	55.8333	37.06	52.5	37.06	73.3333
37.08	57.5	37.08	52.5	37.08	43.3333	37.08	58.3333	37.08	58.3333	37.08	46.6667
37.1	48.3333	37.1	58.3333	37.1	71.6667	37.1	52.5	37.1	52.5	37.1	58.3333
37.12	53.3333	37.12	65	37.12	65	37.12	49.1667	37.12	56.6667	37.12	67.5
37.14	60	37.14	49.1667	37.14	64.1667	37.14	50.8333	37.14	60	37.14	50
37.16	55.8333	37.16	41.6667	37.16	64.1667	37.16	58.3333	37.16	50.8333	37.16	59.1667
37.18	50	37.18	52.5	37.18	54.1667	37.18	75	37.18	53.3333	37.18	55.8333
37.2	56.6667	37.2	50	37.2	55.8333	37.2	57.5	37.2	57.5	37.2	60
37.22	57.5	37.22	40.8333	37.22	50	37.22	68.3333	37.22	53.3333	37.22	48.3333
37.24	65.8333	37.24	44.1667	37.24	55.8333	37.24	62.5	37.24	48.3333	37.24	49.1667
37.26	59.1667	37.26	45	37.26	60.8333	37.26	63.3333	37.26	60.8333	37.26	61.6667
37.28	60.8333	37.28	50	37.28	53.3333	37.28	62.5	37.28	55.8333	37.28	46.6667
37.3	56.6667	37.3	43.3333	37.3	57.5	37.3	57.5	37.3	60	37.3	59.1667
37.32	50	37.32	42.5	37.32	57.5	37.32	52.5	37.32	66.6667	37.32	63.3333
37.34	50.8333	37.34	49.1667	37.34	56.6667	37.34	44.1667	37.34	76.6667	37.34	55.8333
37.36	39.1667	37.36	45.8333	37.36	57.5	37.36	54.1667	37.36	60	37.36	53.3333
37.38	55	37.38	50.8333	37.38	53.3333	37.38	65.8333	37.38	57.5	37.38	64.1667
37.4	52.5	37.4	49.1667	37.4	65	37.4	60.8333	37.4	65	37.4	64.1667
37.42	59.1667	37.42	36.6667	37.42	51.6667	37.42	65.8333	37.42	50	37.42	58.3333
37.44	56.6667	37.44	48.3333	37.44	53.3333	37.44	65	37.44	52.5	37.44	58.3333
37.46	65.8333	37.46	45	37.46	71.6667	37.46	63.3333	37.46	61.6667	37.46	67.5
37.48	58.3333	37.48	55	37.48	48.3333	37.48	66.6667	37.48	65.8333	37.48	49.1667
37.5	51.6667	37.5	61.6667	37.5	61.6667	37.5	60	37.5	63.3333	37.5	50
37.52	43.3333	37.52	52.5	37.52	55.8333	37.52	54.1667	37.52	56.6667	37.52	66.6667
37.54	50	37.54	54.1667	37.54	57.5	37.54	56.6667	37.54	58.3333	37.54	50
37.56	57.5	37.56	55.8333	37.56	63.3333	37.56	54.1667	37.56	54.1667	37.56	45
37.58	60.8333	37.58	57.5	37.58	56.6667	37.58	65.8333	37.58	55	37.58	67.5
37.6	56.6667	37.6	53.3333	37.6	70	37.6	67.5	37.6	47.5	37.6	47.5
37.62	56.6667	37.62	45	37.62	55.8333	37.62	55.8333	37.62	57.5	37.62	70
37.64	55.8333	37.64	45	37.64	58.3333	37.64	54.1667	37.64	71.6667	37.64	55
37.66	60	37.66	47.5	37.66	54.1667	37.66	60	37.66	50	37.66	64.1667
37.68	58.3333	37.68	60	37.68	58.3333	37.68	47.5	37.68	54.1667	37.68	61.6667
37.7	59.1667	37.7	51.6667	37.7	58.3333	37.7	60.8333	37.7	60	37.7	57.5
37.72	51.6667	37.72	44.1667	37.72	64.1667	37.72	39.1667	37.72	60.8333	37.72	64.1667
37.74	60.8333	37.74	51.6667	37.74	57.5	37.74	50	37.74	47.5	37.74	57.5
37.76	63.3333	37.76	45	37.76	76.6667	37.76	64.1667	37.76	66.6667	37.76	53.3333
37.78	61.6667	37.78	44.1667	37.78	81.6667	37.78	54.1667	37.78	67.5	37.78	58.3333
37.8	42.5	37.8	42.5	37.8	66.6667	37.8	75	37.8	54.1667	37.8	60
37.82	51.6667	37.82	50.8333	37.82	70.8333	37.82	43.3333	37.82	70.8333	37.82	58.3333
37.84	47.5	37.84	50.8333	37.84	64.1667	37.84	61.6667	37.84	67.5	37.84	54.1667
37.86	53.3333	37.86	38.3333	37.86	51.6667	37.86	65.8333	37.86	52.5	37.86	64.1667
37.88	54.1667	37.88	43.3333	37.88	54.1667	37.88	60	37.88	54.1667	37.88	50.8333
37.9	55	37.9	40	37.9	64.1667	37.9	60.8333	37.9	43.3333	37.9	58.3333
37.92	45.8333	37.92	38.3333	37.92	50.8333	37.92	63.3333	37.92	52.5	37.92	63.3333
37.94	53.3333	37.94	36.6667	37.94	50	37.94	48.3333	37.94	52.5	37.94	50.8333
37.96	57.5	37.96	44.1667	37.96	49.1667	37.96	60	37.96	59.1667	37.96	64.1667
37.98	53.3333	37.98	46.6667	37.98	65	37.98	55	37.98	57.5	37.98	55
38	40.8333	38	41.6667	38	61.6667	38	60	38	51.6667	38	66.6667
38.02	64.1667	38.02	40.8333	38.02	59.1667	38.02	70	38.02	74.1667	38.02	61.6667
38.04	52.5	38.04	49.1667	38.04	63.3333	38.04	49.1667	38.04	53.3333	38.04	69.1667
38.06	47.5	38.06	38.3333	38.06	57.5	38.06	55.8333	38.06	50	38.06	55.8333
38.08	57.5	38.08	46.6667	38.08	62.5	38.08	54.1667	38.08	47.5	38.08	66.6667
38.1	51.6667	38.1	52.5	38.1	69.1667	38.1	57.5	38.1	52.5	38.1	55.8333
38.12	56.6667	38.12	43.3333	38.12	62.5	38.12	62.5	38.12	61.6667	38.12	54.1667
38.14	54.1667	38.14	52.5	38.14	50.8333	38.14	67.5	38.14	50.8333	38.14	52.5
38.16	45.8333	38.16	45	38.16	55	38.16	47.5	38.16	60	38.16	60.8333
38.18	50	38.18	46.6667	38.18	59.1667	38.18	60	38.18	55.8333	38.18	61.6667
38.2	56.6667	38.2	48.3333	38.2	50.8333	38.2	74.1667	38.2	65.8333	38.2	59.1667
38.22	42.5	38.22	50	38.22	47.5	38.22	60.8333	38.22	61.6667	38.22	65
38.24	40	38.24	45.8333	38.24	56.6667	38.24	51.6667	38.24	47.5	38.24	60
38.26	46.6667	38.26	49.1667	38.26	68.3333	38.26	52.5	38.26	60	38.26	51.6667
38.28	45.8333	38.28	66.6667	38.28	50.8333	38.28	65.8333	38.28	57.5	38.28	52.5
38.3	60	38.3	50.8333	38.3	74.1667	38.3	70	38.3	65	38.3	48.3333
38.32	48.3333	38.32	48.3333	38.32	60	38.32	55.8333	38.32	56.6667	38.32	61.6667
38.34	63.3333	38.34	60	38.34	55	38.34	60	38.34	55	38.34	58.3333
38.36	49.1667	38.36	63.3333	38.36	48.3333	38.36	56.6667	38.36	55.8333	38.36	73.3333
38.38	55	38.38	45.8333	38.38	67.5	38.38	54.1667	38.38	51.6667	38.38	58.3333
38.4	55.8333	38.4	75	38.4	60	38.4	62.5	38.4	67.5	38.4	65
38.42	47.5	38.42	66.6667	38.42	60	38.42	69.1667	38.42	64.1667	38.42	60.8333
38.44	60.8333	38.44	60.8333	38.44	59.1667	38.44	47.5	38.44	65.8333	38.44	74.1667
38.46	48.3333	38.46	55.8333	38.46	73.3333	38.46	55	38.46	53.3333	38.46	55
38.48	56.6667	38.48	65.8333	38.48	65.8333	38.48	49.1667	38.48	56.6667	38.48	63.3333
38.5	62.5	38.5	69.1667	38.5	47.5	38.5	70.8333	38.5	58.3333	38.5	60.8333
38.52	50	38.52	60	38.52	60.8333	38.52	50.8333	38.52	64.1667	38.52	65.8333
38.54	52.5	38.54	60	38.54	49.1667	38.54	73.3333	38.54	63.3333	38.54	71.6667
38.56	50	38.56	57.5	38.56	65	38.56	63.3333	38.56	58.3333	38.56	65.8333
38.58	42.5	38.58	60.8333	38.58	50	38.58	58.3333	38.58	53.3333	38.58	58.3333
38.6	52.5	38.6	53.3333	38.6	54.1667	38.6	64.1667	38.6	42.5	38.6	68.3333
38.62	44.1667	38.62	41.6667	38.62	57.5	38.62	53.3333	38.62	67.5	38.62	59.1667
38.64	60	38.64	47.5	38.64	56.6667	38.64	65.8333	38.64	59.1667	38.64	52.5
38.66	47.5	38.66	56.6667	38.66	49.1667	38.66	61.6667	38.66	55	38.66	62.5
38.68	50	38.68	46.6667	38.68	51.6667	38.68	69.1667	38.68	50.8333	38.68	50.8333
38.7	55.8333	38.7	47.5	38.7	64.1667	38.7	74.1667	38.7	55.8333	38.7	75
38.72	61.6667	38.72	48.3333	38.72	55.8333	38.72	62.5	38.72	60	38.72	45.8333
38.74	52.5	38.74	51.6667	38.74	54.1667	38.74	61.6667	38.74	49.1667	38.74	55.8333
38.76	64.1667	38.76	52.5	38.76	54.1667	38.76	68.3333	38.76	63.3333	38.76	67.5
38.78	52.5	38.78	37.5	38.78	62.5	38.78	67.5	38.78	66.6667	38.78	46.6667
38.8	63.3333	38.8	48.3333	38.8	54.1667	38.8	59.1667	38.8	60.8333	38.8	48.3333
38.82	65.8333	38.82	46.6667	38.82	46.6667	38.82	47.5	38.82	55.8333	38.82	54.1667
38.84	65	38.84	50	38.84	57.5	38.84	61.6667	38.84	63.3333	38.84	69.1667
38.86	51.6667	38.86	39.1667	38.86	69.1667	38.86	55	38.86	54.1667	38.86	52.5
38.88	58.3333	38.88	47.5	38.88	51.6667	38.88	62.5	38.88	67.5	38.88	61.6667
38.9	51.6667	38.9	38.3333	38.9	58.3333	38.9	61.6667	38.9	50	38.9	59.1667
38.92	49.1667	38.92	31.6667	38.92	62.5	38.92	40	38.92	62.5	38.92	51.6667
38.94	56.6667	38.94	53.3333	38.94	55.8333	38.94	55	38.94	51.6667	38.94	75
38.96	52.5	38.96	45.8333	38.96	63.3333	38.96	49.1667	38.96	60.8333	38.96	61.6667
38.98	54.1667	38.98	46.6667	38.98	69.1667	38.98	56.6667	38.98	64.1667	38.98	61.6667
39	59.1667	39	41.6667	39	67.5	39	65	39	54.1667	39	71.6667
39.02	44.1667	39.02	47.5	39.02	61.6667	39.02	46.6667	39.02	65	39.02	62.5
39.04	40.8333	39.04	40	39.04	50	39.04	67.5	39.04	65.8333	39.04	73.3333
39.06	63.3333	39.06	51.6667	39.06	45.8333	39.06	54.1667	39.06	70	39.06	62.5
39.08	59.1667	39.08	41.6667	39.08	67.5	39.08	49.1667	39.08	60.8333	39.08	68.3333
39.1	51.6667	39.1	40.8333	39.1	58.3333	39.1	62.5	39.1	55.8333	39.1	53.3333
39.12	57.5	39.12	41.6667	39.12	63.3333	39.12	56.6667	39.12	55	39.12	60
39.14	39.1667	39.14	50.8333	39.14	56.6667	39.14	55.8333	39.14	66.6667	39.14	55.8333
39.16	51.6667	39.16	40.8333	39.16	56.6667	39.16	60	39.16	52.5	39.16	56.6667
39.18	49.1667	39.18	37.5	39.18	53.3333	39.18	48.3333	39.18	55.8333	39.18	55.8333
39.2	60	39.2	42.5	39.2	49.1667	39.2	54.1667	39.2	53.3333	39.2	63.3333
39.22	45	39.22	51.6667	39.22	45.8333	39.22	73.3333	39.22	65	39.22	57.5
39.24	59.1667	39.24	44.1667	39.24	72.5	39.24	60.8333	39.24	54.1667	39.24	53.3333
39.26	54.1667	39.26	42.5	39.26	60	39.26	58.3333	39.26	45.8333	39.26	55
39.28	53.3333	39.28	49.1667	39.28	41.6667	39.28	74.1667	39.28	58.3333	39.28	60
39.3	55	39.3	57.5	39.3	58.3333	39.3	62.5	39.3	65.8333	39.3	55.8333
39.32	56.6667	39.32	42.5	39.32	75	39.32	69.1667	39.32	49.1667	39.32	64.1667
39.34	50	39.34	44.1667	39.34	59.1667	39.34	55	39.34	50	39.34	59.1667
39.36	44.1667	39.36	40	39.36	57.5	39.36	44.1667	39.36	60.8333	39.36	53.3333
39.38	41.6667	39.38	50.8333	39.38	55.8333	39.38	53.3333	39.38	50	39.38	60.8333
39.4	54.1667	39.4	40.8333	39.4	50.8333	39.4	50.8333	39.4	57.5	39.4	65
39.42	48.3333	39.42	53.3333	39.42	64.1667	39.42	70	39.42	69.1667	39.42	64.1667
39.44	52.5	39.44	51.6667	39.44	53.3333	39.44	62.5	39.44	58.3333	39.44	62.5
39.46	51.6667	39.46	44.1667	39.46	61.6667	39.46	60.8333	39.46	46.6667	39.46	60.8333
39.48	47.5	39.48	46.6667	39.48	50.8333	39.48	52.5	39.48	50.8333	39.48	68.3333
39.5	57.5	39.5	43.3333	39.5	66.6667	39.5	48.3333	39.5	55.8333	39.5	62.5
39.52	51.6667	39.52	46.6667	39.52	60.8333	39.52	55	39.52	52.5	39.52	57.5
39.54	54.1667	39.54	43.3333	39.54	67.5	39.54	45	39.54	52.5	39.54	68.3333
39.56	57.5	39.56	35	39.56	72.5	39.56	58.3333	39.56	54.1667	39.56	51.6667
39.58	67.5	39.58	50.8333	39.58	54.1667	39.58	62.5	39.58	47.5	39.58	55.8333
39.6	53.3333	39.6	50	39.6	55.8333	39.6	55.8333	39.6	57.5	39.6	44.1667
39.62	50.8333	39.62	36.6667	39.62	60.8333	39.62	59.1667	39.62	56.6667	39.62	70.8333
39.64	50	39.64	46.6667	39.64	53.3333	39.64	60.8333	39.64	53.3333	39.64	65.8333
39.66	55	39.66	40	39.66	69.1667	39.66	60	39.66	50	39.66	64.1667
39.68	53.3333	39.68	45.8333	39.68	59.1667	39.68	55.8333	39.68	49.1667	39.68	51.6667
39.7	47.5	39.7	53.3333	39.7	65.8333	39.7	60	39.7	60	39.7	57.5
39.72	46.6667	39.72	58.3333	39.72	63.3333	39.72	55.8333	39.72	58.3333	39.72	45.8333
39.74	57.5	39.74	51.6667	39.74	43.3333	39.74	45.8333	39.74	50.8333	39.74	63.3333
39.76	60.8333	39.76	59.1667	39.76	57.5	39.76	60	39.76	59.1667	39.76	58.3333
39.78	59.1667	39.78	52.5	39.78	53.3333	39.78	64.1667	39.78	51.6667	39.78	55
39.8	49.1667	39.8	44.1667	39.8	56.6667	39.8	48.3333	39.8	59.1667	39.8	60
39.82	53.3333	39.82	50.8333	39.82	65	39.82	58.3333	39.82	55	39.82	60
39.84	57.5	39.84	51.6667	39.84	47.5	39.84	65	39.84	50	39.84	64.1667
39.86	54.1667	39.86	49.1667	39.86	68.3333	39.86	57.5	39.86	56.6667	39.86	62.5
39.88	59.1667	39.88	46.6667	39.88	57.5	39.88	66.6667	39.88	65.8333	39.88	62.5
39.9	50.8333	39.9	41.6667	39.9	61.6667	39.9	63.3333	39.9	63.3333	39.9	69.1667
39.92	59.1667	39.92	45.8333	39.92	50	39.92	55	39.92	60	39.92	56.6667
39.94	55.8333	39.94	46.6667	39.94	50.8333	39.94	53.3333	39.94	49.1667	39.94	55.8333
39.96	59.1667	39.96	52.5	39.96	55	39.96	49.1667	39.96	50.8333	39.96	61.6667
39.98	48.3333	39.98	50.8333	39.98	50	39.98	66.6667	39.98	60	39.98	64.1667
40	59.1667	40	44.1667	40	49.1667	40	56.6667	40	63.3333	40	59.1667
40.02	58.3333	40.02	47.5	40.02	62.5	40.02	50	40.02	60	40.02	55
40.04	45.8333	40.04	35.8333	40.04	56.6667	40.04	64.1667	40.04	54.1667	40.04	52.5
40.06	60	40.06	48.3333	40.06	56.6667	40.06	59.1667	40.06	55	40.06	60.8333
40.08	62.5	40.08	49.1667	40.08	54.1667	40.08	60	40.08	66.6667	40.08	50.8333
40.1	66.6667	40.1	56.6667	40.1	53.3333	40.1	58.3333	40.1	65	40.1	52.5
40.12	58.3333	40.12	45	40.12	60	40.12	52.5	40.12	54.1667	40.12	50.8333
40.14	61.6667	40.14	47.5	40.14	75	40.14	52.5	40.14	53.3333	40.14	55
40.16	58.3333	40.16	41.6667	40.16	51.6667	40.16	70.8333	40.16	50	40.16	58.3333
40.18	65.8333	40.18	36.6667	40.18	64.1667	40.18	51.6667	40.18	47.5	40.18	73.3333
40.2	54.1667	40.2	35.8333	40.2	61.6667	40.2	58.3333	40.2	55.8333	40.2	58.3333
40.22	54.1667	40.22	40	40.22	50	40.22	55	40.22	55.8333	40.22	50
40.24	61.6667	40.24	49.1667	40.24	55	40.24	42.5	40.24	66.6667	40.24	62.5
40.26	50.8333	40.26	46.6667	40.26	70	40.26	53.3333	40.26	55.8333	40.26	55
40.28	65	40.28	55	40.28	60.8333	40.28	48.3333	40.28	55.8333	40.28	61.6667
40.3	56.6667	40.3	42.5	40.3	61.6667	40.3	44.1667	40.3	54.1667	40.3	57.5
40.32	60	40.32	51.6667	40.32	45	40.32	52.5	40.32	51.6667	40.32	61.6667
40.34	51.6667	40.34	42.5	40.34	65	40.34	61.6667	40.34	51.6667	40.34	74.1667
40.36	45	40.36	49.1667	40.36	62.5	40.36	55.8333	40.36	64.1667	40.36	55.8333
40.38	63.3333	40.38	35.8333	40.38	82.5	40.38	54.1667	40.38	51.6667	40.38	59.1667
40.4	48.3333	40.4	50	40.4	59.1667	40.4	48.3333	40.4	58.3333	40.4	55
40.42	42.5	40.42	39.1667	40.42	55	40.42	52.5	40.42	64.1667	40.42	70.8333
40.44	65.8333	40.44	50	40.44	72.5	40.44	55	40.44	63.3333	40.44	60
40.46	61.6667	40.46	58.3333	40.46	52.5	40.46	56.6667	40.46	53.3333	40.46	55
40.48	65.8333	40.48	60	40.48	62.5	40.48	51.6667	40.48	59.1667	40.48	51.6667
40.5	53.3333	40.5	48.3333	40.5	55.8333	40.5	60	40.5	57.5	40.5	57.5
40.52	56.6667	40.52	52.5	40.52	49.1667	40.52	60.8333	40.52	65.8333	40.52	50.8333
40.54	60	40.54	53.3333	40.54	85.8333	40.54	57.5	40.54	42.5	40.54	68.3333
40.56	57.5	40.56	49.1667	40.56	65.8333	40.56	68.3333	40.56	57.5	40.56	60.8333
40.58	58.3333	40.58	60	40.58	66.6667	40.58	55.8333	40.58	50.8333	40.58	58.3333
40.6	52.5	40.6	60.8333	40.6	52.5	40.6	63.3333	40.6	66.6667	40.6	63.3333
40.62	56.6667	40.62	60.8333	40.62	72.5	40.62	63.3333	40.62	58.3333	40.62	55
40.64	52.5	40.64	63.3333	40.64	52.5	40.64	36.6667	40.64	55.8333	40.64	47.5
40.66	70	40.66	65.8333	40.66	56.6667	40.66	63.3333	40.66	65.8333	40.66	61.6667
40.68	55.8333	40.68	40.8333	40.68	64.1667	40.68	56.6667	40.68	57.5	40.68	65.8333
40.7	60	40.7	57.5	40.7	60	40.7	52.5	40.7	74.1667	40.7	45.8333
40.72	51.6667	40.72	46.6667	40.72	67.5	40.72	55	40.72	45.8333	40.72	65.8333
40.74	58.3333	40.74	57.5	40.74	65	40.74	59.1667	40.74	63.3333	40.74	65.8333
40.76	59.1667	40.76	55.8333	40.76	65.8333	40.76	46.6667	40.76	53.3333	40.76	59.1667
40.78	65	40.78	51.6667	40.78	76.6667	40.78	59.1667	40.78	55.8333	40.78	57.5
40.8	52.5	40.8	51.6667	40.8	72.5	40.8	70	40.8	60.8333	40.8	70
40.82	53.3333	40.82	47.5	40.82	56.6667	40.82	50.8333	40.82	69.1667	40.82	75
40.84	49.1667	40.84	47.5	40.84	77.5	40.84	64.1667	40.84	63.3333	40.84	57.5
40.86	59.1667	40.86	50.8333	40.86	58.3333	40.86	45	40.86	71.6667	40.86	60.8333
40.88	55.8333	40.88	40.8333	40.88	58.3333	40.88	65.8333	40.88	68.3333	40.88	57.5
40.9	64.1667	40.9	56.6667	40.9	59.1667	40.9	45	40.9	63.3333	40.9	69.1667
40.92	60	40.92	55	40.92	65	40.92	50	40.92	60	40.92	61.6667
40.94	62.5	40.94	60	40.94	63.3333	40.94	56.6667	40.94	68.3333	40.94	66.6667
40.96	60.8333	40.96	50	40.96	67.5	40.96	51.6667	40.96	63.3333	40.96	70
40.98	61.6667	40.98	61.6667	40.98	73.3333	40.98	48.3333	40.98	64.1667	40.98	64.1667
41	47.5	41	43.3333	41	53.3333	41	60.8333	41	63.3333	41	59.1667
41.02	66.6667	41.02	57.5	41.02	66.6667	41.02	74.1667	41.02	58.3333	41.02	59.1667
41.04	75	41.04	51.6667	41.04	62.5	41.04	74.1667	41.04	55.8333	41.04	62.5
41.06	56.6667	41.06	61.6667	41.06	69.1667	41.06	60.8333	41.06	60	41.06	61.6667
41.08	65.8333	41.08	49.1667	41.08	57.5	41.08	66.6667	41.08	65.8333	41.08	60.8333
41.1	63.3333	41.1	60	41.1	60	41.1	56.6667	41.1	55.8333	41.1	55
41.12	65.8333	41.12	55	41.12	71.6667	41.12	62.5	41.12	60	41.12	76.6667
41.14	59.1667	41.14	42.5	41.14	70	41.14	64.1667	41.14	55	41.14	56.6667
41.16	67.5	41.16	49.1667	41.16	68.3333	41.16	63.3333	41.16	63.3333	41.16	64.1667
41.18	64.1667	41.18	51.6667	41.18	59.1667	41.18	55	41.18	58.3333	41.18	49.1667
41.2	65.8333	41.2	49.1667	41.2	70.8333	41.2	58.3333	41.2	73.3333	41.2	59.1667
41.22	78.3333	41.22	55	41.22	68.3333	41.22	66.6667	41.22	70.8333	41.22	75
41.24	62.5	41.24	61.6667	41.24	75.8333	41.24	50.8333	41.24	50	41.24	60
41.26	72.5	41.26	44.1667	41.26	83.3333	41.26	64.1667	41.26	45.8333	41.26	72.5
41.28	72.5	41.28	60	41.28	65.8333	41.28	58.3333	41.28	57.5	41.28	60.8333
41.3	55	41.3	73.3333	41.3	64.1667	41.3	59.1667	41.3	58.3333	41.3	70
41.32	73.3333	41.32	56.6667	41.32	56.6667	41.32	55	41.32	65	41.32	61.6667
41.34	72.5	41.34	54.1667	41.34	67.5	41.34	63.3333	41.34	65.8333	41.34	63.3333
41.36	68.3333	41.36	63.3333	41.36	68.3333	41.36	55	41.36	66.6667	41.36	69.1667
41.38	72.5	41.38	60	41.38	75.8333	41.38	81.6667	41.38	67.5	41.38	71.6667
41.4	72.5	41.4	68.3333	41.4	63.3333	41.4	69.1667	41.4	60.8333	41.4	70
41.42	58.3333	41.42	55.8333	41.42	79.1667	41.42	69.1667	41.42	45	41.42	78.3333
41.44	85.8333	41.44	70.8333	41.44	64.1667	41.44	75	41.44	73.3333	41.44	69.1667
41.46	59.1667	41.46	67.5	41.46	77.5	41.46	60	41.46	69.1667	41.46	79.1667
41.48	72.5	41.48	54.1667	41.48	80	41.48	61.6667	41.48	68.3333	41.48	64.1667
41.5	83.3333	41.5	74.1667	41.5	76.6667	41.5	68.3333	41.5	56.6667	41.5	72.5
41.52	74.1667	41.52	47.5	41.52	88.3333	41.52	52.5	41.52	78.3333	41.52	72.5
41.54	73.3333	41.54	53.3333	41.54	79.1667	41.54	53.3333	41.54	70	41.54	70
41.56	70	41.56	72.5	41.56	75	41.56	55	41.56	75.8333	41.56	75.8333
41.58	67.5	41.58	65	41.58	65	41.58	67.5	41.58	65.8333	41.58	98.3333
41.6	80.8333	41.6	56.6667	41.6	82.5	41.6	65.8333	41.6	66.6667	41.6	69.1667
41.62	59.1667	41.62	85	41.62	75	41.62	57.5	41.62	51.6667	41.62	85
41.64	75.8333	41.64	63.3333	41.64	73.3333	41.64	70.8333	41.64	60	41.64	75
41.66	71.6667	41.66	74.1667	41.66	81.6667	41.66	61.6667	41.66	74.1667	41.66	78.3333
41.68	62.5	41.68	69.1667	41.68	95.8333	41.68	59.1667	41.68	84.1667	41.68	71.6667
41.7	78.3333	41.7	65	41.7	83.3333	41.7	70.8333	41.7	67.5	41.7	79.1667
41.72	73.3333	41.72	67.5	41.72	63.3333	41.72	55	41.72	60	41.72	66.6667
41.74	70.8333	41.74	63.3333	41.74	91.6667	41.74	65	41.74	75	41.74	78.3333
41.76	73.3333	41.76	69.1667	41.76	96.6667	41.76	65.8333	41.76	70	41.76	81.6667
41.78	72.5	41.78	74.1667	41.78	83.3333	41.78	76.6667	41.78	76.6667	41.78	85.8333
41.8	76.6667	41.8	67.5	41.8	76.6667	41.8	75	41.8	82.5	41.8	87.5
41.82	88.3333	41.82	64.1667	41.82	82.5	41.82	70	41.82	60	41.82	80
41.84	63.3333	41.84	70	41.84	75	41.84	85	41.84	77.5	41.84	78.3333
41.86	77.5	41.86	59.1667	41.86	92.5	41.86	85	41.86	54.1667	41.86	78.3333
41.88	67.5	41.88	72.5	41.88	87.5	41.88	62.5	41.88	87.5	41.88	85
41.9	84.1667	41.9	75	41.9	75	41.9	57.5	41.9	80.8333	41.9	80
41.92	89.1667	41.92	71.6667	41.92	79.1667	41.92	67.5	41.92	75.8333	41.92	83.3333
41.94	72.5	41.94	71.6667	41.94	75	41.94	72.5	41.94	60.8333	41.94	73.3333
41.96	77.5	41.96	59.1667	41.96	73.3333	41.96	64.1667	41.96	58.3333	41.96	80.8333
41.98	68.3333	41.98	64.1667	41.98	84.1667	41.98	80	41.98	79.1667	41.98	88.3333
42	81.6667	42	70	42	90	42	67.5	42	90	42	92.5
42.02	84.1667	42.02	66.6667	42.02	73.3333	42.02	68.3333	42.02	78.3333	42.02	98.3333
42.04	65.8333	42.04	74.1667	42.04	83.3333	42.04	69.1667	42.04	82.5	42.04	89.1667
42.06	75.8333	42.06	73.3333	42.06	80	42.06	69.1667	42.06	82.5	42.06	85.8333
42.08	79.1667	42.08	63.3333	42.08	85	42.08	86.6667	42.08	90	42.08	81.6667
42.1	65.8333	42.1	70.8333	42.1	96.6667	42.1	78.3333	42.1	74.1667	42.1	101.667
42.12	72.5	42.12	63.3333	42.12	84.1667	42.12	73.3333	42.12	71.6667	42.12	89.1667
42.14	90	42.14	73.3333	42.14	88.3333	42.14	80	42.14	80	42.14	100
42.16	80	42.16	83.3333	42.16	104.167	42.16	81.6667	42.16	70.8333	42.16	100.833
42.18	92.5	42.18	62.5	42.18	93.3333	42.18	83.3333	42.18	81.6667	42.18	90
42.2	86.6667	42.2	79.1667	42.2	85	42.2	83.3333	42.2	88.3333	42.2	88.3333
42.22	81.6667	42.22	73.3333	42.22	90	42.22	76.6667	42.22	68.3333	42.22	106.667
42.24	101.667	42.24	77.5	42.24	110.833	42.24	90.8333	42.24	95	42.24	92.5
42.26	97.5	42.26	79.1667	42.26	105	42.26	92.5	42.26	99.1667	42.26	95
42.28	106.667	42.28	78.3333	42.28	87.5	42.28	77.5	42.28	70.8333	42.28	107.5
42.3	95	42.3	77.5	42.3	80	42.3	80.8333	42.3	99.1667	42.3	102.5
42.32	96.6667	42.32	59.1667	42.32	114.167	42.32	70.8333	42.32	85.8333	42.32	102.5
42.34	106.667	42.34	82.5	42.34	98.3333	42.34	86.6667	42.34	84.1667	42.34	105.833
42.36	85.8333	42.36	80.8333	42.36	108.333	42.36	85.8333	42.36	77.5	42.36	97.5
42.38	100	42.38	75.8333	42.38	118.333	42.38	75.8333	42.38	77.5	42.38	94.1667
42.4	95	42.4	70	42.4	93.3333	42.4	84.1667	42.4	80	42.4	81.6667
42.42	104.167	42.42	75.8333	42.42	100.833	42.42	65	42.42	90	42.42	89.1667
42.44	99.1667	42.44	74.1667	42.44	95.8333	42.44	76.6667	42.44	85.8333	42.44	113.333
42.46	105	42.46	92.5	42.46	94.1667	42.46	101.667	42.46	90.8333	42.46	109.167
42.48	102.5	42.48	80	42.48	95.8333	42.48	77.5	42.48	100	42.48	110
42.5	105.833	42.5	84.1667	42.5	110	42.5	80.8333	42.5	102.5	42.5	90.8333
42.52	93.3333	42.52	78.3333	42.52	100	42.52	92.5	42.52	81.6667	42.52	85
42.54	100.833	42.54	76.6667	42.54	103.333	42.54	93.3333	42.54	85.8333	42.54	111.667
42.56	92.5	42.56	75.8333	42.56	108.333	42.56	89.1667	42.56	85	42.56	109.167
42.58	101.667	42.58	83.3333	42.58	102.5	42.58	74.1667	42.58	90	42.58	112.5
42.6	91.6667	42.6	100	42.6	115.833	42.6	76.6667	42.6	105.833	42.6	92.5
42.62	95.8333	42.62	108.333	42.62	94.1667	42.62	80.8333	42.62	88.3333	42.62	97.5
42.64	106.667	42.64	90.8333	42.64	108.333	42.64	81.6667	42.64	90	42.64	120.833
42.66	104.167	42.66	103.333	42.66	97.5	42.66	93.3333	42.66	74.1667	42.66	124.167
42.68	100.833	42.68	84.1667	42.68	112.5	42.68	108.333	42.68	94.1667	42.68	112.5
42.7	118.333	42.7	90.8333	42.7	95	42.7	105.833	42.7	100	42.7	90.8333
42.72	100.833	42.72	103.333	42.72	106.667	42.72	80.8333	42.72	102.5	42.72	105.833
42.74	101.667	42.74	81.6667	42.74	111.667	42.74	90.8333	42.74	89.1667	42.74	108.333
42.76	82.5	42.76	100.833	42.76	100.833	42.76	89.1667	42.76	100	42.76	115
42.78	117.5	42.78	97.5	42.78	103.333	42.78	95	42.78	107.5	42.78	95.8333
42.8	97.5	42.8	103.333	42.8	97.5	42.8	90	42.8	85.8333	42.8	105.833
42.82	107.5	42.82	91.6667	42.82	120.833	42.82	86.6667	42.82	107.5	42.82	106.667
42.84	107.5	42.84	84.1667	42.84	120	42.84	95.8333	42.84	97.5	42.84	111.667
42.86	108.333	42.86	98.3333	42.86	113.333	42.86	100.833	42.86	109.167	42.86	107.5
42.88	104.167	42.88	92.5	42.88	116.667	42.88	94.1667	42.88	110	42.88	105.833
42.9	99.1667	42.9	88.3333	42.9	109.167	42.9	100	42.9	105	42.9	115
42.92	110	42.92	94.1667	42.92	130.833	42.92	106.667	42.92	108.333	42.92	116.667
42.94	130.833	42.94	106.667	42.94	113.333	42.94	110.833	42.94	92.5	42.94	119.167
42.96	129.167	42.96	95.8333	42.96	105	42.96	106.667	42.96	99.1667	42.96	135
42.98	105.833	42.98	95	42.98	123.333	42.98	83.3333	42.98	101.667	42.98	120.833
43	112.5	43	97.5	43	111.667	43	86.6667	43	119.167	43	110.833
43.02	125.833	43.02	93.3333	43.02	107.5	43.02	102.5	43.02	95.8333	43.02	101.667
43.04	117.5	43.04	96.6667	43.04	119.167	43.04	118.333	43.04	95.8333	43.04	116.667
43.06	125.833	43.06	84.1667	43.06	115.833	43.06	101.667	43.06	95.8333	43.06	122.5
43.08	117.5	43.08	106.667	43.08	115	43.08	95	43.08	99.1667	43.08	125.833
43.1	114.167	43.1	84.1667	43.1	99.1667	43.1	100	43.1	96.6667	43.1	130
43.12	114.167	43.12	82.5	43.12	104.167	43.12	109.167	43.12	128.333	43.12	116.667
43.14	120.833	43.14	101.667	43.14	112.5	43.14	90	43.14	114.167	43.14	120.833
43.16	130.833	43.16	96.6667	43.16	121.667	43.16	94.1667	43.16	87.5	43.16	110.833
43.18	108.333	43.18	105.833	43.18	120.833	43.18	88.3333	43.18	97.5	43.18	120.833
43.2	104.167	43.2	96.6667	43.2	110	43.2	88.3333	43.2	115	43.2	124.167
43.22	113.333	43.22	129.167	43.22	97.5	43.22	99.1667	43.22	102.5	43.22	102.5
43.24	120.833	43.24	114.167	43.24	115	43.24	100.833	43.24	109.167	43.24	112.5
43.26	122.5	43.26	104.167	43.26	108.333	43.26	104.167	43.26	103.333	43.26	129.167
43.28	131.667	43.28	95.8333	43.28	131.667	43.28	93.3333	43.28	107.5	43.28	129.167
43.3	111.667	43.3	100	43.3	133.333	43.3	105.833	43.3	110	43.3	120
43.32	127.5	43.32	101.667	43.32	110	43.32	128.333	43.32	82.5	43.32	132.5
43.34	102.5	43.34	110	43.34	123.333	43.34	90.8333	43.34	88.3333	43.34	120.833
43.36	112.5	43.36	120	43.36	110	43.36	83.3333	43.36	116.667	43.36	115
43.38	130	43.38	108.333	43.38	125	43.38	96.6667	43.38	105	43.38	105
43.4	112.5	43.4	114.167	43.4	113.333	43.4	99.1667	43.4	111.667	43.4	137.5
43.42	104.167	43.42	119.167	43.42	119.167	43.42	96.6667	43.42	105	43.42	121.667
43.44	110.833	43.44	119.167	43.44	104.167	43.44	114.167	43.44	90	43.44	122.5
43.46	97.5	43.46	98.3333	43.46	119.167	43.46	99.1667	43.46	104.167	43.46	126.667
43.48	112.5	43.48	83.3333	43.48	124.167	43.48	105	43.48	98.3333	43.48	135.833
43.5	125.833	43.5	120	43.5	133.333	43.5	92.5	43.5	103.333	43.5	134.167
43.52	112.5	43.52	104.167	43.52	115	43.52	104.167	43.52	95	43.52	111.667
43.54	119.167	43.54	110	43.54	106.667	43.54	94.1667	43.54	105.833	43.54	115
43.56	127.5	43.56	110.833	43.56	131.667	43.56	113.333	43.56	120	43.56	123.333
43.58	115.833	43.58	110.833	43.58	108.333	43.58	99.1667	43.58	114.167	43.58	110.833
43.6	120	43.6	93.3333	43.6	113.333	43.6	92.5	43.6	111.667	43.6	112.5
43.62	104.167	43.62	100.833	43.62	106.667	43.62	105.833	43.62	110	43.62	119.167
43.64	125.833	43.64	104.167	43.64	105.833	43.64	103.333	43.64	83.3333	43.64	127.5
43.66	105	43.66	109.167	43.66	111.667	43.66	119.167	43.66	102.5	43.66	133.333
43.68	117.5	43.68	99.1667	43.68	120.833	43.68	103.333	43.68	113.333	43.68	123.333
43.7	103.333	43.7	99.1667	43.7	137.5	43.7	114.167	43.7	107.5	43.7	122.5
43.72	120.833	43.72	90	43.72	110.833	43.72	96.6667	43.72	102.5	43.72	115
43.74	100	43.74	106.667	43.74	101.667	43.74	96.6667	43.74	91.6667	43.74	129.167
43.76	126.667	43.76	97.5	43.76	106.667	43.76	93.3333	43.76	100	43.76	137.5
43.78	115	43.78	99.1667	43.78	116.667	43.78	117.5	43.78	90	43.78	109.167
43.8	123.333	43.8	100.833	43.8	106.667	43.8	74.1667	43.8	102.5	43.8	126.667
43.82	100.833	43.82	101.667	43.82	104.167	43.82	97.5	43.82	105.833	43.82	113.333
43.84	112.5	43.84	96.6667	43.84	121.667	43.84	113.333	43.84	114.167	43.84	113.333
43.86	101.667	43.86	107.5	43.86	111.667	43.86	97.5	43.86	101.667	43.86	110
43.88	106.667	43.88	97.5	43.88	119.167	43.88	115.833	43.88	106.667	43.88	121.667
43.9	120	43.9	104.167	43.9	115.833	43.9	118.333	43.9	97.5	43.9	124.167
43.92	120.833	43.92	113.333	43.92	130	43.92	102.5	43.92	125	43.92	135
43.94	110	43.94	97.5	43.94	104.167	43.94	107.5	43.94	108.333	43.94	116.667
43.96	112.5	43.96	89.1667	43.96	92.5	43.96	95.8333	43.96	89.1667	43.96	105
43.98	110	43.98	103.333	43.98	117.5	43.98	97.5	43.98	98.3333	43.98	130.833
44	105.833	44	103.333	44	106.667	44	115.833	44	105	44	110.833
44.02	105.833	44.02	95	44.02	128.333	44.02	94.1667	44.02	90.8333	44.02	112.5
44.04	106.667	44.04	105.833	44.04	121.667	44.04	99.1667	44.04	110	44.04	120.833
44.06	89.1667	44.06	84.1667	44.06	103.333	44.06	108.333	44.06	92.5	44.06	120.833
44.08	103.333	44.08	93.3333	44.08	107.5	44.08	94.1667	44.08	91.6667	44.08	111.667
44.1	102.5	44.1	97.5	44.1	113.333	44.1	92.5	44.1	107.5	44.1	121.667
44.12	106.667	44.12	101.667	44.12	120.833	44.12	104.167	44.12	103.333	44.12	123.333
44.14	130	44.14	101.667	44.14	112.5	44.14	113.333	44.14	95.8333	44.14	136.667
44.16	102.5	44.16	96.6667	44.16	106.667	44.16	108.333	44.16	103.333	44.16	115.833
44.18	109.167	44.18	98.3333	44.18	111.667	44.18	102.5	44.18	103.333	44.18	139.167
44.2	100	44.2	89.1667	44.2	101.667	44.2	100	44.2	95	44.2	110.833
44.22	99.1667	44.22	94.1667	44.22	112.5	44.22	87.5	44.22	108.333	44.22	111.667
44.24	110	44.24	83.3333	44.24	105.833	44.24	97.5	44.24	99.1667	44.24	112.5
44.26	95.8333	44.26	90	44.26	115	44.26	95	44.26	95	44.26	92.5
44.28	113.333	44.28	95	44.28	98.3333	44.28	80.8333	44.28	100.833	44.28	119.167
44.3	119.167	44.3	110	44.3	108.333	44.3	109.167	44.3	109.167	44.3	115
44.32	103.333	44.32	76.6667	44.32	103.333	44.32	100	44.32	90.8333	44.32	107.5
44.34	101.667	44.34	101.667	44.34	110.833	44.34	98.3333	44.34	104.167	44.34	115
44.36	108.333	44.36	99.1667	44.36	115.833	44.36	90.8333	44.36	98.3333	44.36	103.333
44.38	106.667	44.38	98.3333	44.38	106.667	44.38	100.833	44.38	90	44.38	101.667
44.4	92.5	44.4	93.3333	44.4	95.8333	44.4	93.3333	44.4	90	44.4	98.3333
44.42	98.3333	44.42	93.3333	44.42	110.833	44.42	94.1667	44.42	81.6667	44.42	112.5
44.44	120	44.44	80	44.44	105.833	44.44	88.3333	44.44	93.3333	44.44	130.833
44.46	102.5	44.46	101.667	44.46	126.667	44.46	71.6667	44.46	90	44.46	116.667
44.48	95	44.48	100.833	44.48	110.833	44.48	94.1667	44.48	92.5	44.48	113.333
44.5	100	44.5	85	44.5	100	44.5	94.1667	44.5	92.5	44.5	103.333
44.52	109.167	44.52	95.8333	44.52	108.333	44.52	85	44.52	100.833	44.52	103.333
44.54	100	44.54	89.1667	44.54	95	44.54	90	44.54	97.5	44.54	120.833
44.56	101.667	44.56	99.1667	44.56	100.833	44.56	100.833	44.56	79.1667	44.56	109.167
44.58	108.333	44.58	94.1667	44.58	92.5	44.58	85	44.58	103.333	44.58	108.333
44.6	111.667	44.6	80.8333	44.6	91.6667	44.6	93.3333	44.6	81.6667	44.6	119.167
44.62	104.167	44.62	95	44.62	116.667	44.62	75	44.62	100	44.62	97.5
44.64	98.3333	44.64	76.6667	44.64	82.5	44.64	105	44.64	92.5	44.64	114.167
44.66	88.3333	44.66	95.8333	44.66	120	44.66	84.1667	44.66	99.1667	44.66	81.6667
44.68	102.5	44.68	90	44.68	95.8333	44.68	93.3333	44.68	95	44.68	110
44.7	99.1667	44.7	100	44.7	105	44.7	75.8333	44.7	89.1667	44.7	87.5
44.72	105	44.72	89.1667	44.72	98.3333	44.72	85	44.72	86.6667	44.72	110
44.74	109.167	44.74	89.1667	44.74	105	44.74	103.333	44.74	93.3333	44.74	108.333
44.76	106.667	44.76	90.8333	44.76	85.8333	44.76	95.8333	44.76	82.5	44.76	95
44.78	87.5	44.78	73.3333	44.78	94.1667	44.78	84.1667	44.78	93.3333	44.78	105.833
44.8	97.5	44.8	87.5	44.8	94.1667	44.8	91.6667	44.8	92.5	44.8	115
44.82	100.833	44.82	92.5	44.82	90	44.82	81.6667	44.82	85	44.82	89.1667
44.84	112.5	44.84	80	44.84	98.3333	44.84	90.8333	44.84	85	44.84	110.833
44.86	86.6667	44.86	93.3333	44.86	106.667	44.86	110.833	44.86	85.8333	44.86	105
44.88	99.1667	44.88	95	44.88	107.5	44.88	94.1667	44.88	98.3333	44.88	119.167
44.9	86.6667	44.9	86.6667	44.9	115	44.9	77.5	44.9	94.1667	44.9	105.833
44.92	81.6667	44.92	77.5	44.92	96.6667	44.92	99.1667	44.92	93.3333	44.92	102.5
44.94	84.1667	44.94	75	44.94	90	44.94	89.1667	44.94	80	44.94	110.833
44.96	83.3333	44.96	85.8333	44.96	100	44.96	63.3333	44.96	87.5	44.96	95.8333
[truncated: 2,252 more rows]

## Sheet: XPS-CC-Co-MOF
Survey				Co 2P				N1s				O1s				C1s
Binding energy (eV)	Counts per second	Trans Fn		Binding energy (eV)	Counts per second	Trans Fn		Binding energy (eV)	Counts per second	Trans Fn		Binding energy (eV)	Counts per second	Trans Fn		Binding energy (eV)	Counts per second	Trans Fn
1200	48591.7	43.7681		812.505	10832	6.10301		416.505	4991.33	5.92292		542.505	5246	6.02108		302.505	3533.75	5.73699
1199	48320.4	43.7584		812.455	10768.3	6.10297		416.455	5024	5.92289		542.455	5154	6.02105		302.455	3376.25	5.7369
1198	48682.2	43.7488		812.405	10820.3	6.10293		416.405	5037.33	5.92286		542.405	5123.5	6.02101		302.405	3393.75	5.7368
1197	48420.9	43.7392		812.355	10710.3	6.10289		416.355	4952.67	5.92283		542.355	5160	6.02098		302.355	3495	5.7367
1196	49335.4	43.7296		812.305	10745	6.10285		416.305	4960	5.9228		542.305	5226.5	6.02094		302.305	3571.25	5.7366
1195	48782.7	43.7199		812.255	10750.7	6.1028		416.255	4987.33	5.92277		542.255	5273	6.0209		302.255	3416.25	5.7365
1194	49224.9	43.7103		812.205	10660.3	6.10276		416.205	4956.67	5.92274		542.205	5240	6.02087		302.205	3521.25	5.73641
1193	49586.7	43.7007		812.155	10630.7	6.10272		416.155	5025.33	5.92271		542.155	5278.5	6.02083		302.155	3582.5	5.73631
1192	49023.9	43.6911		812.105	10789	6.10268		416.105	4829.33	5.92268		542.105	5212	6.0208		302.105	3490	5.73621
1191	49365.6	43.6814		812.055	10720	6.10264		416.055	4880.67	5.92265		542.055	5153.5	6.02076		302.055	3435	5.73611
1190	49516.3	43.6718		812.005	10688.3	6.1026		416.005	4874	5.92262		542.005	5193	6.02073		302.005	3426.25	5.73601
1189	49134.4	43.6622		811.955	10735.3	6.10255		415.955	4889.33	5.92259		541.955	5232	6.02069		301.955	3436.25	5.73592
1188	49214.8	43.6526		811.905	10761.7	6.10251		415.905	4914.67	5.92256		541.905	5193.5	6.02065		301.905	3430	5.73582
1187	49265.1	43.6429		811.855	10775	6.10247		415.855	4905.33	5.92253		541.855	5258.5	6.02062		301.855	3360	5.73572
1186	50089.2	43.6333		811.805	10756	6.10243		415.805	4932.67	5.92251		541.805	5308	6.02058		301.805	3313.75	5.73562
1185	49265.1	43.6237		811.755	10743.3	6.10239		415.755	4860	5.92248		541.755	5294	6.02055		301.755	3351.25	5.73552
1184	49094.2	43.6141		811.705	10690.7	6.10234		415.705	4940	5.92245		541.705	5234	6.02051		301.705	3426.25	5.73543
1183	49636.9	43.6044		811.655	10770	6.1023		415.655	4892.67	5.92242		541.655	5209.5	6.02047		301.655	3448.75	5.73533
1182	49466.1	43.5948		811.605	10747.3	6.10226		415.605	4907.33	5.92239		541.605	5219.5	6.02044		301.605	3318.75	5.73523
1181	50561.5	43.5852		811.555	10756.3	6.10222		415.555	4934	5.92236		541.555	5187.5	6.0204		301.555	3388.75	5.73513
1180	49827.9	43.5756		811.505	10734.7	6.10218		415.505	4972.67	5.92233		541.505	5164.5	6.02037		301.505	3395	5.73503
1179	49677.1	43.5659		811.455	10690	6.10213		415.455	4978	5.9223		541.455	5214	6.02033		301.455	3436.25	5.73494
1178	50270.1	43.5563		811.405	10711.3	6.10209		415.405	4927.33	5.92227		541.405	5226	6.0203		301.405	3316.25	5.73484
1177	51837.9	43.5467		811.355	10736.3	6.10205		415.355	4885.33	5.92224		541.355	5214	6.02026		301.355	3343.75	5.73474
1176	50762.5	43.5462		811.305	10646.3	6.10201		415.305	4850	5.92221		541.305	5156	6.02022		301.305	3307.5	5.73464
1175	49707.3	43.5497		811.255	10692	6.10197		415.255	4900	5.92218		541.255	5270.5	6.02019		301.255	3316.25	5.73454
1174	49677.1	43.5533		811.205	10643	6.10193		415.205	4837.33	5.92215		541.205	5231	6.02015		301.205	3296.25	5.73445
1173	50812.8	43.5569		811.155	10647.3	6.10188		415.155	4800.67	5.92212		541.155	5229	6.02012		301.155	3311.25	5.73435
1172	50822.8	43.5604		811.105	10800	6.10184		415.105	4807.33	5.92209		541.105	5210.5	6.02008		301.105	3287.5	5.73425
1171	50350.5	43.564		811.055	10649.3	6.1018		415.055	4868.67	5.92206		541.055	5181.5	6.02005		301.055	3253.75	5.73415
1170	50692.2	43.5676		811.005	10661.3	6.10176		415.005	4888.67	5.92203		541.005	5217	6.02001		301.005	3218.75	5.73405
1169	50581.6	43.5711		810.955	10683.3	6.10172		414.955	4875.33	5.92201		540.955	5154.5	6.01997		300.955	3213.75	5.73396
1168	50913.3	43.5747		810.905	10643.7	6.10167		414.905	4819.33	5.92198		540.905	5206	6.01994		300.905	3275	5.73386
1167	50682.1	43.5783		810.855	10669.3	6.10163		414.855	4769.33	5.92195		540.855	5232	6.0199		300.855	3270	5.73376
1166	50280.1	43.5818		810.805	10697	6.10159		414.805	4821.33	5.92192		540.805	5244.5	6.01987		300.805	3170	5.73366
1165	50300.2	43.5854		810.755	10662.7	6.10155		414.755	4847.33	5.92189		540.755	5260.5	6.01983		300.755	3202.5	5.73356
1164	50923.3	43.589		810.705	10654	6.10151		414.705	4800.67	5.92186		540.705	5296	6.01979		300.705	3248.75	5.73347
1163	51817.8	43.5925		810.655	10680.3	6.10147		414.655	4712.67	5.92183		540.655	5263	6.01976		300.655	3150	5.73337
1162	51596.7	43.5961		810.605	10696.7	6.10142		414.605	4744.67	5.9218		540.605	5233.5	6.01972		300.605	3200	5.73327
1161	50993.7	43.5997		810.555	10708	6.10138		414.555	4787.33	5.92177		540.555	5186.5	6.01969		300.555	3241.25	5.73317
1160	51506.2	43.6032		810.505	10690	6.10134		414.505	4790	5.92174		540.505	5287.5	6.01965		300.505	3166.25	5.73307
1159	51084.1	43.6068		810.455	10758.3	6.1013		414.455	4765.33	5.92171		540.455	5178	6.01962		300.455	3118.75	5.73298
1158	50812.8	43.6104		810.405	10660.7	6.10126		414.405	4728.67	5.92168		540.405	5229	6.01958		300.405	3031.25	5.73288
1157	50792.7	43.6139		810.355	10672.3	6.10121		414.355	4698	5.92165		540.355	5257.5	6.01954		300.355	3003.75	5.73278
1156	51536.4	43.6175		810.305	10727.7	6.10117		414.305	4774.67	5.92162		540.305	5197	6.01951		300.305	3102.5	5.73268
1155	51456	43.6211		810.255	10626	6.10113		414.255	4776	5.92159		540.255	5247.5	6.01947		300.255	3125	5.73258
1154	51646.9	43.6246		810.205	10619.3	6.10109		414.205	4756.67	5.92156		540.205	5191	6.01944		300.205	3100	5.73249
1153	51646.9	43.6282		810.155	10592	6.10105		414.155	4784	5.92154		540.155	5188	6.0194		300.155	3157.5	5.73239
1152	51586.6	43.6318		810.105	10696.3	6.101		414.105	4896	5.92151		540.105	5252	6.01937		300.105	3088.75	5.73229
1151	52511.2	43.6353		810.055	10592.7	6.10096		414.055	4774	5.92148		540.055	5147	6.01933		300.055	3170	5.73219
1150	51687.1	43.6389		810.005	10630.3	6.10092		414.005	4709.33	5.92145		540.005	5261	6.01929		300.005	3135	5.73209
1149	53476	43.6425		809.955	10766	6.10088		413.955	4688	5.92142		539.955	5248	6.01926		299.955	3055	5.732
1148	51586.6	43.646		809.905	10784	6.10084		413.905	4741.33	5.92139		539.905	5181	6.01922		299.905	3042.5	5.7319
1147	51325.3	43.6496		809.855	10629	6.1008		413.855	4734	5.92136		539.855	5185.5	6.01919		299.855	3058.75	5.7318
1146	52219.8	43.6532		809.805	10609	6.10075		413.805	4765.33	5.92133		539.805	5190.5	6.01915		299.805	3072.5	5.7317
1145	52682.1	43.6567		809.755	10664	6.10071		413.755	4798	5.9213		539.755	5197.5	6.01911		299.755	3056.25	5.7316
1144	53425.8	43.6603		809.705	10644.3	6.10067		413.705	4756.67	5.92127		539.705	5217	6.01908		299.705	3063.75	5.73151
1143	52772.5	43.6639		809.655	10656.3	6.10063		413.655	4646.67	5.92124		539.655	5218.5	6.01904		299.655	2971.25	5.73141
1142	52571.5	43.6674		809.605	10646.3	6.10059		413.605	4660	5.92121		539.605	5209	6.01901		299.605	2947.5	5.73131
1141	53234.8	43.671		809.555	10642.7	6.10054		413.555	4661.33	5.92118		539.555	5173.5	6.01897		299.555	2942.5	5.73121
1140	52400.7	43.6746		809.505	10576.3	6.1005		413.505	4732	5.92115		539.505	5145	6.01894		299.505	2890	5.73111
1139	53385.6	43.6781		809.455	10599.7	6.10046		413.455	4742	5.92112		539.455	5237	6.0189		299.455	2961.25	5.73102
1138	51928.3	43.6817		809.405	10557.7	6.10042		413.405	4665.33	5.92109		539.405	5217.5	6.01886		299.405	3075	5.73092
1137	53275	43.6853		809.355	10607.3	6.10038		413.355	4667.33	5.92106		539.355	5197	6.01883		299.355	2963.75	5.73082
1136	53546.4	43.6888		809.305	10736	6.10033		413.305	4588	5.92104		539.305	5161	6.01879		299.305	2952.5	5.73072
1135	53003.7	43.6924		809.255	10715.7	6.10029		413.255	4618.67	5.92101		539.255	5149	6.01876		299.255	2940	5.73062
1134	52420.8	43.696		809.205	10714.3	6.10025		413.205	4661.33	5.92098		539.205	5143.5	6.01872		299.205	2867.5	5.73053
1133	54310.2	43.6995		809.155	10631	6.10021		413.155	4605.33	5.92095		539.155	5158.5	6.01869		299.155	2987.5	5.73046
1132	53646.9	43.7031		809.105	10673.7	6.10017		413.105	4714	5.92092		539.105	5204.5	6.01865		299.105	2928.75	5.73041
1131	54018.7	43.7067		809.055	10691.3	6.10013		413.055	4632.67	5.92089		539.055	5166	6.01861		299.055	2912.5	5.73035
1130	54631.8	43.7102		809.005	10640	6.10008		413.005	4687.33	5.92086		539.005	5193	6.01858		299.005	2907.5	5.7303
1129	53747.4	43.7138		808.955	10703.3	6.10004		412.955	4676	5.92083		538.955	5175	6.01854		298.955	2906.25	5.73024
1128	52943.4	43.7174		808.905	10744.3	6.1		412.905	4761.33	5.9208		538.905	5196	6.01851		298.905	2853.75	5.73018
1127	53556.4	43.7209		808.855	10719.3	6.09996		412.855	4592	5.92077		538.855	5037.5	6.01847		298.855	2837.5	5.73013
1126	54430.8	43.7204		808.805	10660.3	6.09992		412.805	4602.67	5.92074		538.805	5195.5	6.01844		298.805	2878.75	5.73007
1125	53938.3	43.718		808.755	10622	6.09987		412.755	4692.67	5.92071		538.755	5136.5	6.0184		298.755	2918.75	5.73002
1124	53144.4	43.7156		808.705	10554	6.09983		412.705	4615.33	5.92068		538.705	5147	6.01836		298.705	2803.75	5.72996
1123	53415.7	43.7133		808.655	10711.3	6.09979		412.655	4671.33	5.92065		538.655	5110.5	6.01833		298.655	2806.25	5.7299
1122	53214.7	43.7109		808.605	10679.3	6.09975		412.605	4624	5.92062		538.605	5146	6.01829		298.605	2852.5	5.72985
1121	53094.1	43.7085		808.555	10665.3	6.09971		412.555	4679.33	5.92059		538.555	5131	6.01826		298.555	2912.5	5.72979
1120	53626.8	43.7061		808.505	10647.3	6.09967		412.505	4611.33	5.92056		538.505	5152	6.01822		298.505	2801.25	5.72974
1119	53445.9	43.7037		808.455	10659	6.09962		412.455	4526	5.92054		538.455	5028.5	6.01818		298.455	2786.25	5.72968
1118	53084.1	43.7014		808.405	10626.7	6.09958		412.405	4615.33	5.92051		538.405	5050.5	6.01815		298.405	2733.75	5.72963
1117	53707.2	43.699		808.355	10602.3	6.09954		412.355	4617.33	5.92048		538.355	5161.5	6.01811		298.355	2775	5.72957
1116	53687.1	43.6966		808.305	10657	6.0995		412.305	4603.33	5.92045		538.305	5088.5	6.01808		298.305	2713.75	5.72951
1115	53898.1	43.6942		808.255	10657.3	6.09946		412.255	4604.67	5.92042		538.255	5136	6.01804		298.255	2741.25	5.72946
1114	53194.6	43.6918		808.205	10684	6.09941		412.205	4576.67	5.92039		538.205	5069.5	6.01801		298.205	2722.5	5.7294
1113	53305.2	43.6895		808.155	10623	6.09937		412.155	4609.33	5.92036		538.155	5081.5	6.01797		298.155	2707.5	5.72935
1112	54280	43.6871		808.105	10731.7	6.09933		412.105	4698	5.92033		538.105	4996	6.01793		298.105	2768.75	5.72929
1111	54883	43.6847		808.055	10728.3	6.09929		412.055	4512.67	5.9203		538.055	5065	6.0179		298.055	2743.75	5.72924
1110	53988.6	43.6823		808.005	10666	6.09925		412.005	4500	5.92027		538.005	5103	6.01786		298.005	2730	5.72918
1109	55204.6	43.6799		807.955	10653.7	6.0992		411.955	4660	5.92024		537.955	5162.5	6.01783		297.955	2747.5	5.72912
1108	54410.7	43.6775		807.905	10748	6.09916		411.905	4618	5.92021		537.905	5175	6.01779		297.905	2738.75	5.72907
1107	54651.9	43.6752		807.855	10670.3	6.09912		411.855	4619.33	5.92018		537.855	5121.5	6.01776		297.855	2678.75	5.72901
1106	54481	43.6728		807.805	10669	6.09908		411.805	4473.33	5.92015		537.805	5086.5	6.01772		297.805	2553.75	5.72896
1105	54551.4	43.6704		807.755	10781	6.09904		411.755	4485.33	5.92012		537.755	5060.5	6.01768		297.755	2672.5	5.7289
1104	54239.8	43.668		807.705	10750	6.099		411.705	4600	5.92009		537.705	5063	6.01765		297.705	2678.75	5.72884
1103	54491.1	43.6656		807.655	10720	6.09895		411.655	4568	5.92006		537.655	4980.5	6.01761		297.655	2695	5.72879
1102	53707.2	43.6633		807.605	10788.3	6.09891		411.605	4585.33	5.92004		537.605	5086.5	6.01758		297.605	2693.75	5.72873
1101	52229.8	43.6609		807.555	10673	6.09887		411.555	4590.67	5.92001		537.555	5057	6.01754		297.555	2673.75	5.72868
1100	52471	43.6585		807.505	10718.7	6.09883		411.505	4528.67	5.91998		537.505	4968	6.0175		297.505	2642.5	5.72862
1099	53084.1	43.6561		807.455	10698	6.09879		411.455	4520	5.91995		537.455	4990	6.01747		297.455	2641.25	5.72857
1098	51717.3	43.6537		807.405	10747.3	6.09874		411.405	4546	5.91992		537.405	4971.5	6.01743		297.405	2525	5.72851
1097	50149.5	43.6514		807.355	10688	6.0987		411.355	4509.33	5.91989		537.355	5018.5	6.0174		297.355	2585	5.72845
1096	50380.6	43.649		807.305	10843	6.09866		411.305	4538.67	5.91986		537.305	5082	6.01736		297.305	2626.25	5.7284
1095	50491.2	43.6466		807.255	10830	6.09862		411.255	4495.33	5.91983		537.255	5049.5	6.01733		297.255	2648.75	5.72834
1094	50350.5	43.6442		807.205	10807.3	6.09858		411.205	4482.67	5.9198		537.205	5032.5	6.01729		297.205	2587.5	5.72829
1093	50812.8	43.6418		807.155	10903.7	6.09853		411.155	4480	5.91977		537.155	5051	6.01725		297.155	2542.5	5.72823
1092	50049	43.6394		807.105	10792.7	6.09849		411.105	4498	5.91974		537.105	5064	6.01722		297.105	2572.5	5.72818
1091	49837.9	43.6371		807.055	10795.7	6.09845		411.055	4392.67	5.91971		537.055	5051.5	6.01718		297.055	2601.25	5.72812
1090	50873.1	43.6347		807.005	10727.7	6.09841		411.005	4409.33	5.91968		537.005	4989.5	6.01715		297.005	2563.75	5.72806
1089	50491.2	43.6323		806.955	10744.3	6.09837		410.955	4408.67	5.91965		536.955	5046.5	6.01711		296.955	2537.5	5.72801
1088	50692.2	43.6299		806.905	10837.3	6.09833		410.905	4374	5.91962		536.905	5098.5	6.01708		296.905	2560	5.72795
1087	49647	43.6275		806.855	10847	6.09828		410.855	4398	5.91959		536.855	5062	6.01704		296.855	2618.75	5.7279
1086	50420.8	43.6252		806.805	10838.3	6.09824		410.805	4382.67	5.91957		536.805	5020	6.017		296.805	2565	5.72784
1085	49908.3	43.6228		806.755	10824.3	6.0982		410.755	4411.33	5.91954		536.755	5068.5	6.01697		296.755	2557.5	5.72778
1084	50692.2	43.6204		806.705	10841	6.09816		410.705	4449.33	5.91951		536.705	5093.5	6.01693		296.705	2433.75	5.72773
1083	50832.9	43.618		806.655	10817.7	6.09812		410.655	4377.33	5.91948		536.655	5082.5	6.0169		296.655	2465	5.72767
1082	50350.5	43.6156		806.605	10799.7	6.09807		410.605	4341.33	5.91945		536.605	5044.5	6.01686		296.605	2560	5.72762
1081	50953.5	43.6133		806.555	10868	6.09803		410.555	4295.33	5.91942		536.555	5035.5	6.01682		296.555	2490	5.72756
1080	52239.9	43.6109		806.505	10934.3	6.09799		410.505	4362.67	5.91939		536.505	5054	6.01679		296.505	2518.75	5.72751
1079	50973.6	43.6085		806.455	10852.7	6.09795		410.455	4332	5.91936		536.455	5051.5	6.01675		296.455	2490	5.72745
1078	50732.4	43.6061		806.405	10810.3	6.09791		410.405	4372	5.91933		536.405	5060	6.01672		296.405	2493.75	5.72739
1077	51395.7	43.6037		806.355	10871.7	6.09786		410.355	4316	5.9193		536.355	5153	6.01668		296.355	2475	5.72734
1076	50973.6	43.6045		806.305	10999	6.09782		410.305	4272.67	5.91927		536.305	5140.5	6.01665		296.305	2417.5	5.72728
1075	51737.4	43.6067		806.255	11008	6.09778		410.255	4338	5.91924		536.255	5102	6.01661		296.255	2353.75	5.72723
1074	52139.4	43.6089		806.205	10901	6.09774		410.205	4262	5.91921		536.205	5058	6.01657		296.205	2466.25	5.72717
1073	51506.2	43.6111		806.155	10938	6.0977		410.155	4282.67	5.91918		536.155	5069.5	6.01654		296.155	2460	5.72711
1072	50722.3	43.6133		806.105	10958	6.09766		410.105	4331.33	5.91915		536.105	5098	6.0165		296.105	2475	5.72706
1071	50903.2	43.6155		806.055	11002	6.09761		410.055	4332.67	5.91912		536.055	5169.5	6.01647		296.055	2355	5.727
1070	51325.3	43.6177		806.005	10999.3	6.09757		410.005	4324	5.91909		536.005	5116	6.01643		296.005	2461.25	5.72695
1069	51285.1	43.6199		805.955	11028	6.09753		409.955	4258.67	5.91907		535.955	5102.5	6.0164		295.955	2408.75	5.72689
1068	50702.2	43.6221		805.905	11048.7	6.09749		409.905	4280.67	5.91904		535.905	5136.5	6.01636		295.905	2393.75	5.72684
1067	52541.4	43.6243		805.855	11034.7	6.09745		409.855	4303.33	5.91901		535.855	5188	6.01632		295.855	2295	5.72678
1066	51375.6	43.6265		805.805	11025	6.0974		409.805	4314	5.91898		535.805	5159.5	6.01629		295.805	2318.75	5.72672
1065	50611.8	43.6287		805.755	11099.7	6.09736		409.755	4324.67	5.91895		535.755	5137	6.01625		295.755	2367.5	5.72667
1064	51938.4	43.6309		805.705	11066.3	6.09732		409.705	4247.33	5.91892		535.705	5093.5	6.01622		295.705	2402.5	5.72661
1063	51224.8	43.6331		805.655	11035	6.09728		409.655	4292.67	5.91889		535.655	5164.5	6.01618		295.655	2410	5.72656
1062	51586.6	43.6353		805.605	11083.3	6.09724		409.605	4278	5.91886		535.605	5177.5	6.01614		295.605	2417.5	5.7265
1061	51586.6	43.6375		805.555	11117	6.0972		409.555	4302.67	5.91883		535.555	5184.5	6.01611		295.555	2397.5	5.72645
1060	52169.5	43.6397		805.505	11076.7	6.09715		409.505	4340.67	5.9188		535.505	5175	6.01607		295.505	2382.5	5.72639
1059	52059	43.6419		805.455	11099.3	6.09711		409.455	4282.67	5.91877		535.455	5226.5	6.01604		295.455	2426.25	5.72633
1058	52239.9	43.6441		805.405	11183	6.09707		409.405	4322	5.91874		535.405	5220	6.016		295.405	2448.75	5.72628
1057	52069	43.6463		805.355	11138	6.09703		409.355	4259.33	5.91871		535.355	5201.5	6.01597		295.355	2378.75	5.72622
1056	52360.5	43.6485		805.305	11205.3	6.09699		409.305	4242	5.91868		535.305	5185.5	6.01593		295.305	2400	5.72617
1055	52641.9	43.6507		805.255	11239	6.09694		409.255	4247.33	5.91865		535.255	5212.5	6.01589		295.255	2368.75	5.72611
1054	52802.7	43.6529		805.205	11152.7	6.0969		409.205	4264.67	5.91862		535.205	5204	6.01586		295.205	2376.25	5.72605
1053	53144.4	43.6551		805.155	11182.3	6.09686		409.155	4280	5.91859		535.155	5280.5	6.01582		295.155	2366.25	5.726
1052	53254.9	43.6573		805.105	11290.3	6.09682		409.105	4218	5.91857		535.105	5250	6.01579		295.105	2353.75	5.72594
1051	53546.4	43.6595		805.055	11228	6.09678		409.055	4308.67	5.91854		535.055	5325	6.01575		295.055	2282.5	5.72589
1050	52450.9	43.6617		805.005	11256.7	6.09673		409.005	4317.33	5.91851		535.005	5282	6.01572		295.005	2282.5	5.72583
1049	52551.4	43.6639		804.955	11188	6.09669		408.955	4344.67	5.91848		534.955	5308.5	6.01568		294.955	2342.5	5.72578
1048	52983.6	43.6661		804.905	11275.7	6.09665		408.905	4234.67	5.91845		534.905	5296	6.01564		294.905	2393.75	5.72572
1047	51918.3	43.6683		804.855	11296.3	6.09661		408.855	4339.33	5.91842		534.855	5335	6.01561		294.855	2342.5	5.72566
1046	52812.7	43.6705		804.805	11284	6.09657		408.805	4333.33	5.91839		534.805	5415	6.01557		294.805	2300	5.72561
1045	53254.9	43.6727		804.755	11301.7	6.09653		408.755	4319.33	5.91836		534.755	5333	6.01554		294.755	2308.75	5.72555
1044	53757.4	43.6749		804.705	11360.7	6.09648		408.705	4316	5.91833		534.705	5388.5	6.0155		294.705	2367.5	5.7255
1043	53677	43.6771		804.655	11369	6.09644		408.655	4273.33	5.9183		534.655	5304	6.01546		294.655	2362.5	5.72544
1042	53455.9	43.6793		804.605	11369	6.0964		408.605	4320	5.91827		534.605	5398.5	6.01543		294.605	2341.25	5.72539
1041	53596.6	43.6815		804.555	11213.3	6.09636		408.555	4324.67	5.91824		534.555	5392.5	6.01539		294.555	2311.25	5.72533
1040	53918.2	43.6837		804.505	11278.3	6.09632		408.505	4330	5.91821		534.505	5441	6.01536		294.505	2363.75	5.72527
1039	53144.4	43.6859		804.455	11386	6.09627		408.455	4333.33	5.91818		534.455	5468	6.01532		294.455	2447.5	5.72522
1038	52983.6	43.6881		804.405	11309.7	6.09623		408.405	4396	5.91815		534.405	5416.5	6.01529		294.405	2418.75	5.72516
1037	54119.2	43.6903		804.355	11418	6.09619		408.355	4304.67	5.91812		534.355	5462.5	6.01525		294.355	2365	5.72511
1036	53576.5	43.6925		804.305	11442.7	6.09615		408.305	4350.67	5.9181		534.305	5572	6.01521		294.305	2415	5.72505
1035	54913.2	43.6947		804.255	11444	6.09611		408.255	4403.33	5.91807		534.255	5518	6.01518		294.255	2325	5.72499
1034	54350.4	43.6969		804.205	11456	6.09606		408.205	4421.33	5.91804		534.205	5532.5	6.01514		294.205	2303.75	5.72494
1033	54028.8	43.6991		804.155	11388.7	6.09602		408.155	4427.33	5.91801		534.155	5623.5	6.01511		294.155	2350	5.72488
1032	54561.4	43.7013		804.105	11361	6.09598		408.105	4460	5.91798		534.105	5637	6.01507		294.105	2377.5	5.72483
1031	54822.7	43.7035		804.055	11470.3	6.09594		408.055	4401.33	5.91795		534.055	5689	6.01504		294.055	2423.75	5.72477
1030	54611.7	43.7057		804.005	11466.3	6.0959		408.005	4481.33	5.91792		534.005	5707	6.015		294.005	2366.25	5.72472
1029	54963.4	43.7079		803.955	11524.7	6.09586		407.955	4418.67	5.91789		533.955	5801.5	6.01496		293.955	2386.25	5.72466
1028	54862.9	43.7101		803.905	11491	6.09581		407.905	4514.67	5.91786		533.905	5741.5	6.01493		293.905	2352.5	5.7246
1027	53918.2	43.7123		803.855	11482.7	6.09577		407.855	4466.67	5.91783		533.855	5748.5	6.01489		293.855	2390	5.72455
1026	54802.6	43.7161		803.805	11547.7	6.09573		407.805	4473.33	5.9178		533.805	5831	6.01486		293.805	2365	5.72449
1025	55435.8	43.7207		803.755	11470.7	6.09569		407.755	4432.67	5.91777		533.755	5883	6.01482		293.755	2310	5.72444
1024	56561.4	43.7252		803.705	11518	6.09565		407.705	4388	5.91774		533.705	5877.5	6.01479		293.705	2368.75	5.72438
1023	54822.7	43.7297		803.655	11590.7	6.0956		407.655	4511.33	5.91771		533.655	5876.5	6.01475		293.655	2373.75	5.72433
1022	54460.9	43.7343		803.605	11580.7	6.09556		407.605	4535.33	5.91768		533.605	5988.5	6.01471		293.605	2380	5.72427
1021	54923.2	43.7388		803.555	11568.7	6.09552		407.555	4542.67	5.91765		533.555	6107.5	6.01468		293.555	2467.5	5.72421
1020	55867.9	43.7434		803.505	11606	6.09548		407.505	4513.33	5.91762		533.505	6214.5	6.01464		293.505	2425	5.72416
1019	54883	43.7479		803.455	11504	6.09544		407.455	4560.67	5.9176		533.455	6180	6.01461		293.455	2445	5.7241
1018	55295.1	43.7525		803.405	11611	6.0954		407.405	4534.67	5.91757		533.405	6216.5	6.01457		293.405	2453.75	5.72405
1017	55948.3	43.757		803.355	11666.7	6.09535		407.355	4556.67	5.91754		533.355	6352.5	6.01453		293.355	2505	5.72399
1016	55325.2	43.7616		803.305	11714.7	6.09531		407.305	4562	5.91751		533.305	6365.5	6.0145		293.305	2426.25	5.72393
1015	55807.6	43.7661		803.255	11730	6.09527		407.255	4621.33	5.91748		533.255	6470.5	6.01446		293.255	2443.75	5.72388
1014	55536.3	43.7707		803.205	11745.3	6.09523		407.205	4644.67	5.91745		533.205	6648	6.01443		293.205	2416.25	5.72382
1013	55717.2	43.7752		803.155	11771.7	6.09519		407.155	4632	5.91742		533.155	6699	6.01439		293.155	2467.5	5.72377
1012	56692	43.7797		803.105	11709	6.09514		407.105	4595.33	5.91739		533.105	6685.5	6.01436		293.105	2437.5	5.72371
1011	57526.2	43.7843		803.055	11677.3	6.0951		407.055	4616.67	5.91736		533.055	6741.5	6.01432		293.055	2447.5	5.72366
1010	55827.7	43.7888		803.005	11758	6.09506		407.005	4668	5.91733		533.005	6913.5	6.01428		293.005	2531.25	5.7236
1009	56179.5	43.7934		802.955	11681.3	6.09502		406.955	4689.33	5.9173		532.955	7094	6.01425		292.955	2460	5.72354
1008	55888	43.7979		802.905	11722.7	6.09498		406.905	4687.33	5.91727		532.905	7179	6.01421		292.905	2585	5.72349
1007	57104.1	43.8025		802.855	11747.7	6.09493		406.855	4649.33	5.91724		532.855	7224.5	6.01418		292.855	2502.5	5.72343
1006	57234.7	43.807		802.805	11877.7	6.09489		406.805	4762.67	5.91721		532.805	7418.5	6.01414		292.805	2480	5.72338
1005	56511.1	43.8116		802.755	11846.7	6.09485		406.755	4718.67	5.91718		532.755	7493.5	6.01411		292.755	2503.75	5.72332
1004	56661.9	43.8161		802.705	11825.7	6.09481		406.705	4734	5.91715		532.705	7685.5	6.01407		292.705	2502.5	5.72327
1003	56682	43.8206		802.655	11870.3	6.09477		406.655	4786	5.91712		532.655	7730	6.01403		292.655	2596.25	5.72321
1002	57375.4	43.8252		802.605	11912	6.09473		406.605	4790	5.9171		532.605	7868.5	6.014		292.605	2530	5.72315
1001	57676.9	43.8297		802.555	11898	6.09468		406.555	4802.67	5.91707		532.555	7976.5	6.01396		292.555	2557.5	5.7231
1000	58480.9	43.8343		802.505	11835.3	6.09464		406.505	4790	5.91704		532.505	8171	6.01393		292.505	2541.25	5.72304
999	57415.6	43.8388		802.455	11754.7	6.0946		406.455	4786	5.91701		532.455	8295.5	6.01389		292.455	2625	5.72299
998	57646.8	43.8434		802.405	11859	6.09456		406.405	4707.33	5.91698		532.405	8495	6.01385		292.405	2625	5.72293
997	57958.3	43.8479		802.355	12007.3	6.09452		406.355	4826.67	5.91695		532.355	8675	6.01382		292.355	2563.75	5.72287
996	57787.5	43.8525		802.305	11890	6.09447		406.305	4784	5.91692		532.305	8844.5	6.01378		292.305	2621.25	5.72282
995	58129.2	43.857		802.255	11845	6.09443		406.255	4730	5.91689		532.255	8928.5	6.01375		292.255	2556.25	5.72276
994	58340.2	43.8616		802.205	11923	6.09439		406.205	4748	5.91686		532.205	9125.5	6.01371		292.205	2618.75	5.72271
993	57717.1	43.8661		802.155	12000	6.09435		406.155	4829.33	5.91683		532.155	9167.5	6.01368		292.155	2647.5	5.72265
992	56611.6	43.8706		802.105	11888.3	6.09431		406.105	4841.33	5.9168		532.105	9428	6.01364		292.105	2703.75	5.7226
991	57807.6	43.8752		802.055	11944.3	6.09426		406.055	4769.33	5.91677		532.055	9514.5	6.0136		292.055	2676.25	5.72254
990	57656.8	43.8797		802.005	12060.3	6.09422		406.005	4753.33	5.91674		532.005	9667.5	6.01357		292.005	2643.75	5.72248
989	58058.8	43.8843		801.955	11872.7	6.09418		405.955	4697.33	5.91671		531.955	9813	6.01353		291.955	2696.25	5.72243
988	57445.8	43.8888		801.905	11908	6.09414		405.905	4692	5.91668		531.905	9955	6.0135		291.905	2741.25	5.72237
987	59164.3	43.8934		801.855	11902.3	6.0941		405.855	4619.33	5.91665		531.855	10091.5	6.01346		291.855	2775	5.72232
986	58732.2	43.8979		801.805	11955	6.09406		405.805	4556	5.91662		531.805	10310	6.01343		291.805	2773.75	5.72226
985	57375.4	43.9025		801.755	12001.3	6.09401		405.755	4636.67	5.9166		531.755	10351	6.01339		291.755	2693.75	5.72221
984	57877.9	43.907		801.705	11854.3	6.09397		405.705	4618.67	5.91657		531.705	10409	6.01335		291.705	2770	5.72215
983	58199.5	43.9115		801.655	11847.3	6.09393		405.655	4558	5.91654		531.655	10578.5	6.01332		291.655	2766.25	5.72209
982	58300	43.9161		801.605	11914.7	6.09389		405.605	4470.67	5.91651		531.605	10731	6.01328		291.605	2732.5	5.72204
981	58028.7	43.9206		801.555	11863	6.09385		405.555	4483.33	5.91648		531.555	10601	6.01325		291.555	2848.75	5.72198
980	59445.7	43.9252		801.505	11847	6.0938		405.505	4370.67	5.91645		531.505	10620.5	6.01321		291.505	2808.75	5.72193
979	60179.4	43.9297		801.455	11804.7	6.09376		405.455	4335.33	5.91642		531.455	10653	6.01317		291.455	2765	5.72187
978	60320.1	43.9343		801.405	11823.3	6.09372		405.405	4296.67	5.91639		531.405	10805	6.01314		291.405	2817.5	5.72181
977	61315	43.9388		801.355	11765.7	6.09368		405.355	4246	5.91636		531.355	10784	6.0131		291.355	2816.25	5.72176
976	60852.7	43.9438		801.305	11785	6.09364		405.305	4248.67	5.91633		531.305	10795	6.01307		291.305	2722.5	5.7217
975	59666.8	43.9489		801.255	11829	6.0936		405.255	4256.67	5.9163		531.255	10617	6.01303		291.255	2722.5	5.72165
974	60480.9	43.954		801.205	11811.7	6.09355		405.205	4264.67	5.91627		531.205	10635	6.013		291.205	2708.75	5.72159
973	59998.5	43.9591		801.155	11712	6.09351		405.155	4217.33	5.91624		531.155	10579	6.01296		291.155	2816.25	5.72154
972	60390.4	43.9643		801.105	11702.3	6.09347		405.105	4140.67	5.91621		531.105	10469.5	6.01292		291.105	2916.25	5.72148
971	60742.2	43.9694		801.055	11606.3	6.09343		405.055	4145.33	5.91618		531.055	10250	6.01289		291.055	2745	5.72142
970	59898	43.9745		801.005	11581	6.09339		405.005	4087.33	5.91615		531.005	10217.5	6.01285		291.005	2761.25	5.72137
969	59244.7	43.9796		800.955	11585.7	6.09334		404.955	4108.67	5.91613		530.955	10100.5	6.01282		290.955	2756.25	5.72131
968	58038.7	43.9847		800.905	11643.7	6.0933		404.905	4008	5.9161		530.905	9963	6.01278		290.905	2633.75	5.72126
967	57355.3	43.9899		800.855	11619	6.09326		404.855	4052	5.91607		530.855	9740.5	6.01275		290.855	2632.5	5.7212
966	56521.2	43.995		800.805	11471.3	6.09322		404.805	4000.67	5.91604		530.805	9507.5	6.01271		290.805	2628.75	5.72114
965	55767.4	44.0001		800.755	11486	6.09318		404.755	3906	5.91601		530.755	9360.5	6.01267		290.755	2661.25	5.72109
964	55898.1	44.0052		800.705	11363.3	6.09313		404.705	3866	5.91598		530.705	9161	6.01264		290.705	2595	5.72103
963	55134.3	44.0104		800.655	11318.3	6.09309		404.655	3956.67	5.91595		530.655	8985.5	6.0126		290.655	2615	5.72098
962	56038.8	44.0155		800.605	11337.7	6.09305		404.605	3963.33	5.91592		530.605	8885	6.01257		290.605	2531.25	5.72092
961	56269.9	44.0206		800.555	11377	6.09301		404.555	3905.33	5.91589		530.555	8513	6.01253		290.555	2617.5	5.72087
960	55114.2	44.0257		800.505	11387.7	6.09297		404.505	3899.33	5.91586		530.505	8275	6.01249		290.505	2507.5	5.72081
959	54661.9	44.0309		800.455	11314	6.09293		404.455	3928.67	5.91583		530.455	8093.5	6.01246		290.455	2392.5	5.72075
958	55797.6	44.036		800.405	11250.7	6.09288		404.405	3872.67	5.9158		530.405	7947	6.01242		290.405	2362.5	5.7207
957	56099.1	44.0411		800.355	11220	6.09284		404.355	3889.33	5.91577		530.355	7815.5	6.01239		290.355	2331.25	5.72064
956	56481	44.0462		800.305	11208.7	6.0928		404.305	3806	5.91574		530.305	7572	6.01235		290.305	2316.25	5.72059
955	56290	44.0514		800.255	11203.3	6.09276		404.255	3818	5.91571		530.255	7398	6.01232		290.255	2200	5.72053
954	56330.2	44.0565		800.205	11229.7	6.09272		404.205	3880.67	5.91568		530.205	7214.5	6.01228		290.205	2295	5.72048
953	56682	44.0616		800.155	11170.3	6.09267		404.155	3872	5.91565		530.155	7087	6.01224		290.155	2245	5.72042
952	57737.2	44.0667		800.105	11037	6.09263		404.105	3871.33	5.91563		530.105	6986	6.01221		290.105	2200	5.72036
951	56400.6	44.0718		800.055	11087	6.09259		404.055	3852	5.9156		530.055	6673.5	6.01217		290.055	2120	5.72031
950	56531.2	44.077		800.005	10990.3	6.09255		404.005	3832	5.91557		530.005	6550.5	6.01214		290.005	2190	5.72025
949	56792.5	44.0821		799.955	10969	6.09251		403.955	3790.67	5.91554		529.955	6427	6.0121		289.955	2171.25	5.7202
948	57254.8	44.0872		799.905	10965.7	6.09246		403.905	3861.33	5.91551		529.905	6314	6.01207		289.905	2115	5.72014
947	56470.9	44.0923		799.855	10972.3	6.09242		403.855	3832.67	5.91548		529.855	6187.5	6.01203		289.855	2082.5	5.72008
946	56310.1	44.0975		799.805	10944.3	6.09238		403.805	3825.33	5.91545		529.805	6094	6.01199		289.805	2020	5.72003
945	56290	44.1026		799.755	11034	6.09234		403.755	3853.33	5.91542		529.755	6008.5	6.01196		289.755	2052.5	5.71997
944	57094	44.1077		799.705	11107	6.0923		403.705	3844	5.91539		529.705	5896	6.01192		289.705	2065	5.71992
943	56139.3	44.1128		799.655	11083.3	6.09226		403.655	3842.67	5.91536		529.655	5718	6.01189		289.655	2028.75	5.71986
942	56782.5	44.118		799.605	10913.3	6.09221		403.605	3741.33	5.91533		529.605	5607.5	6.01185		289.605	2006.25	5.71981
941	56300.1	44.1231		799.555	10876	6.09217		403.555	3770.67	5.9153		529.555	5589	6.01182		289.555	1967.5	5.71975
940	56028.7	44.1282		799.505	11008.7	6.09213		403.505	3824.67	5.91527		529.505	5541	6.01178		289.505	1978.75	5.71969
939	56470.9	44.1333		799.455	10998	6.09209		403.455	3805.33	5.91524		529.455	5500	6.01174		289.455	1988.75	5.71964
938	57546.3	44.1385		799.405	11017.7	6.09205		403.405	3765.33	5.91521		529.405	5354.5	6.01171		289.405	2000	5.71958
937	56511.1	44.1436		799.355	11014.7	6.092		403.355	3784.67	5.91518		529.355	5302.5	6.01167		289.355	2027.5	5.71953
936	57636.7	44.1487		799.305	10968.3	6.09196		403.305	3789.33	5.91515		529.305	5298	6.01164		289.305	2032.5	5.71947
935	57486	44.1538		799.255	10912.3	6.09192		403.255	3791.33	5.91513		529.255	5357	6.0116		289.255	1985	5.71942
934	57526.2	44.159		799.205	11011.7	6.09188		403.205	3766	5.9151		529.205	5330.5	6.01156		289.205	1955	5.71936
933	58420.6	44.1641		799.155	11103	6.09184		403.155	3807.33	5.91507		529.155	5176.5	6.01153		289.155	2016.25	5.7193
932	59385.4	44.1692		799.105	11080.3	6.09179		403.105	3824	5.91504		529.105	5102	6.01149		289.105	2172.5	5.71925
931	59003.5	44.1743		799.055	11022	6.09175		403.055	3841.33	5.91501		529.055	5120.5	6.01146		289.055	2187.5	5.71919
930	58872.9	44.1794		799.005	11051.7	6.09171		403.005	3898	5.91498		529.005	5100	6.01142		289.005	2210	5.71914
929	58822.6	44.1846		798.955	11103.7	6.09167		402.955	3854.67	5.91495		528.955	5048	6.01139		288.955	2202.5	5.71908
928	58943.2	44.1897		798.905	11189	6.09163		402.905	3784.67	5.91492		528.905	5017.5	6.01135		288.905	2196.25	5.71902
927	58762.3	44.1948		798.855	11165	6.09159		402.855	3896	5.91489		528.855	5002	6.01131		288.855	2275	5.71897
926	58973.4	44.2018		798.805	11111.7	6.09154		402.805	3884.67	5.91486		528.805	5001.5	6.01128		288.805	2387.5	5.71891
925	58300	44.2097		798.755	11186.7	6.0915		402.755	3849.33	5.91483		528.755	5011	6.01124		288.755	2392.5	5.71886
924	58290	44.2176		798.705	11198.3	6.09146		402.705	3866	5.9148		528.705	5015.5	6.01121		288.705	2363.75	5.7188
923	58169.4	44.2255		798.655	11155.3	6.09142		402.655	3934	5.91477		528.655	5017	6.01117		288.655	2460	5.71875
922	57777.4	44.2334		798.605	11188.7	6.09138		402.605	3925.33	5.91474		528.605	4968.5	6.01114		288.605	2491.25	5.71869
921	56119.2	44.2412		798.555	11260.3	6.09133		402.555	3951.33	5.91471		528.555	4972.5	6.0111		288.555	2487.5	5.71863
920	54953.4	44.2491		798.505	11286.3	6.09129		402.505	3964.67	5.91468		528.505	4996.5	6.01106		288.505	2641.25	5.71858
919	55053.9	44.257		798.455	11268	6.09125		402.455	3922	5.91465		528.455	4966	6.01103		288.455	2668.75	5.71852
918	56410.6	44.2649		798.405	11377.3	6.09121		402.405	3855.33	5.91463		528.405	4924	6.01099		288.405	2733.75	5.71847
917	55355.4	44.2728		798.355	11384.7	6.09117		402.355	3970.67	5.9146		528.355	4887	6.01096		288.355	2808.75	5.71841
916	55727.2	44.2806		798.305	11466.3	6.09113		402.305	3977.33	5.91457		528.305	4958	6.01092		288.305	2782.5	5.71836
915	55355.4	44.2885		798.255	11468	6.09108		402.255	4013.33	5.91454		528.255	4979	6.01088		288.255	2815	5.7183
914	56048.8	44.2964		798.205	11484.7	6.09104		402.205	4067.33	5.91451		528.205	4866	6.01085		288.205	3083.75	5.71824
913	55506.1	44.3043		798.155	11506	6.091		402.155	4000.67	5.91448		528.155	4956.5	6.01081		288.155	3155	5.71819
912	56450.8	44.3121		798.105	11589.7	6.09096		402.105	4039.33	5.91445		528.105	4944.5	6.01078		288.105	3276.25	5.71813
911	57063.9	44.32		798.055	11658	6.09092		402.055	4140.67	5.91442		528.055	4860.5	6.01074		288.055	3386.25	5.71808
910	55214.7	44.3279		798.005	11683.3	6.09087		402.005	4092.67	5.91439		528.005	4806	6.01071		288.005	3406.25	5.71802
909	55224.7	44.3358		797.955	11704.3	6.09083		401.955	4156.67	5.91436		527.955	4918.5	6.01067		287.955	3447.5	5.71796
908	55777.5	44.3437		797.905	11781	6.09079		401.905	4148	5.91433		527.905	4878.5	6.01063		287.905	3572.5	5.71791
907	55435.8	44.3515		797.855	11875	6.09075		401.855	4114.67	5.9143		527.855	4858	6.0106		287.855	3781.25	5.71785
906	55074	44.3594		797.805	11910	6.09071		401.805	4306.67	5.91427		527.805	4874	6.01056		287.805	3856.25	5.7178
905	56129.2	44.3673		797.755	11915.3	6.09066		401.755	4253.33	5.91424		527.755	4880.5	6.01053		287.755	3980	5.71774
904	55023.7	44.3752		797.705	11848.7	6.09062		401.705	4356	5.91421		527.705	4875.5	6.01049		287.705	4056.25	5.71769
903	55164.4	44.3831		797.655	11897.3	6.09058		401.655	4320.67	5.91418		527.655	4915.5	6.01046		287.655	4216.25	5.71763
902	55727.2	44.3909		797.605	11917.3	6.09054		401.605	4313.33	5.91416		527.605	4879.5	6.01042		287.605	4436.25	5.71757
901	57043.8	44.3988		797.555	11954.3	6.0905		401.555	4355.33	5.91413		527.555	4917	6.01038		287.555	4528.75	5.71752
900	56722.2	44.4067		797.505	12043.3	6.09046		401.505	4479.33	5.9141		527.505	4903	6.01035		287.505	4752.5	5.71746
899	56521.2	44.4146		797.455	12126.7	6.09041		401.455	4639.33	5.91407		527.455	4909	6.01031		287.455	4771.25	5.71741
898	56491	44.4225		797.405	12072.7	6.09037		401.405	4568	5.91404		527.405	4913	6.01028		287.405	4941.25	5.71735
897	55636.8	44.4303		797.355	12123.7	6.09033		401.355	4615.33	5.91401		527.355	4844	6.01024		287.355	4963.75	5.7173
896	56521.2	44.4382		797.305	12293.7	6.09029		401.305	4738	5.91398		527.305	4907.5	6.0102		287.305	4828.75	5.71724
895	56450.8	44.4461		797.255	12300	6.09025		401.255	4842.67	5.91395		527.255	4883.5	6.01017		287.255	4960	5.71718
894	56732.2	44.454		797.205	12314	6.0902		401.205	4890.67	5.91392		527.205	4877.5	6.01013		287.205	4978.75	5.71713
893	56792.5	44.4618		797.155	12248.3	6.09016		401.155	4972	5.91389		527.155	4881.5	6.0101		287.155	4942.5	5.71707
892	56430.7	44.4697		797.105	12413.7	6.09012		401.105	5063.33	5.91386		527.105	4868.5	6.01006		287.105	4991.25	5.71702
891	55656.9	44.4776		797.055	12498	6.09008		401.055	5160	5.91383		527.055	4896.5	6.01003		287.055	4962.5	5.71696
890	56792.5	44.4855		797.005	12503.3	6.09004		401.005	5289.33	5.9138		527.005	4946	6.00999		287.005	5090	5.7169
889	57435.7	44.4934		796.955	12466.7	6.08999		400.955	5498	5.91377		526.955	4889.5	6.00995		286.955	5153.75	5.71685
888	57747.3	44.5012		796.905	12617	6.08995		400.905	5500	5.91374		526.905	4861	6.00992		286.905	5198.75	5.71679
887	57797.5	44.5091		796.855	12559.7	6.08991		400.855	5579.33	5.91371		526.855	4872.5	6.00988		286.855	5211.25	5.71674
886	56772.4	44.517		796.805	12609.3	6.08987		400.805	5742	5.91368		526.805	4893	6.00985		286.805	5321.25	5.71668
885	56541.3	44.5249		796.755	12594	6.08983		400.755	5829.33	5.91366		526.755	4847.5	6.00981		286.755	5346.25	5.71663
884	55687	44.5328		796.705	12649.3	6.08979		400.705	5816	5.91363		526.705	4844.5	6.00978		286.705	5633.75	5.71657
883	57134.2	44.5406		796.655	12765.3	6.08974		400.655	6018	5.9136		526.655	4934	6.00974		286.655	5756.25	5.71651
882	56903.1	44.5485		796.605	12726	6.0897		400.605	6194.67	5.91357		526.605	4899.5	6.0097		286.605	6038.75	5.71646
881	57576.4	44.5564		796.555	12737	6.08966		400.555	6386.67	5.91354		526.555	4878	6.00967		286.555	6258.75	5.7164
880	57375.4	44.5643		796.505	12752	6.08962		400.505	6354.67	5.91351		526.505	4834	6.00963		286.505	6345	5.71635
879	56601.6	44.5722		796.455	12702	6.08958		400.455	6518	5.91348		526.455	4828.5	6.0096		286.455	6673.75	5.71629
878	57676.9	44.58		796.405	12697.3	6.08953		400.405	6656.67	5.91345		526.405	4873.5	6.00956		286.405	6840	5.71624
877	57596.5	44.5879		796.355	12635.7	6.08949		400.355	6803.33	5.91342		526.355	4899	6.00952		286.355	7212.5	5.71618
876	57325.2	44.5961		796.305	12668.7	6.08945		400.305	6858.67	5.91339		526.305	4893.5	6.00949		286.305	7701.25	5.71612
875	56893	44.6045		796.255	12668.3	6.08941		400.255	7046	5.91336		526.255	4856	6.00945		286.255	7798.75	5.71607
874	57234.7	44.6129		796.205	12708	6.08937		400.205	7133.33	5.91333		526.205	4891	6.00942		286.205	8268.75	5.71601
873	58440.7	44.6213		796.155	12614.7	6.08933		400.155	7124.67	5.9133		526.155	4855	6.00938		286.155	8696.25	5.71596
872	58983.4	44.6297		796.105	12602	6.08928		400.105	7420	5.91327		526.105	4895	6.00935		286.105	9108.75	5.7159
871	58340.2	44.6381		796.055	12578.7	6.08924		400.055	7612.67	5.91324		526.055	4826	6.00931		286.055	9527.5	5.71584
870	57797.5	44.6465		796.005	12566	6.0892		400.005	7673.33	5.91321		526.005	4890	6.00927		286.005	9916.25	5.71579
869	57687	44.6549		795.955	12603.3	6.08916		399.955	7942.67	5.91318		525.955	4917	6.00924		285.955	10372.5	5.71573
868	56611.6	44.6633		795.905	12518.3	6.08912		399.905	8102	5.91316		525.905	4836	6.0092		285.905	10952.5	5.71568
867	56209.6	44.6717		795.855	12337.3	6.08907		399.855	8216.67	5.91313		525.855	4923	6.00917		285.855	11430	5.71562
866	56692	44.6801		795.805	12489	6.08903		399.805	8563.33	5.9131		525.805	4939.5	6.00913		285.805	11983.7	5.71557
865	57536.2	44.6885		795.755	12370.7	6.08899		399.755	8710	5.91307		525.755	4898.5	6.0091		285.755	12488.7	5.71551
864	57164.4	44.6969		795.705	12252.7	6.08895		399.705	9006	5.91304		525.705	4838.5	6.00906		285.705	13202.5	5.71545
863	54712.2	44.7053		795.655	12285	6.08891		399.655	9416.67	5.91301		525.655	4891	6.00902		285.655	13730	5.7154
862	56722.2	44.7137		795.605	12157.7	6.08886		399.605	9534.67	5.91298		525.605	4878.5	6.00899		285.605	14475	5.71534
861	57526.2	44.7221		795.555	12087.3	6.08882		399.555	9869.33	5.91295		525.555	4898.5	6.00895		285.555	14837.5	5.71529
860	57204.6	44.7305		795.505	11975.3	6.08878		399.505	10330.7	5.91292		525.505	4924.5	6.00892		285.505	15610	5.71523
859	57616.6	44.7389		795.455	11913	6.08874		399.455	10582.7	5.91289		525.455	4930	6.00888		285.455	16267.5	5.71517
858	58702	44.7473		795.405	11886.3	6.0887		399.405	10976	5.91286		525.405	4837	6.00885		285.405	16961.2	5.71512
857	58219.6	44.7557		795.355	11804.7	6.08866		399.355	11354	5.91283		525.355	4938	6.00881		285.355	17576.2	5.71506
856	56983.5	44.7641		795.305	11750	6.08861		399.305	11972	5.9128		525.305	4926	6.00877		285.305	18172.5	5.71501
855	57656.8	44.7725		795.255	11543.7	6.08857		399.255	12468.7	5.91277		525.255	4821	6.00874		285.255	18525	5.71495
854	58179.4	44.7809		795.205	11429.7	6.08853		399.205	12736	5.91274		525.205	4846	6.0087		285.205	19305	5.7149
853	58189.5	44.7893		795.155	11417.3	6.08849		399.155	13316.7	5.91271		525.155	4884	6.00867		285.155	19645	5.71484
852	58300	44.7977		795.105	11312.3	6.08845		399.105	13843.3	5.91268		525.105	4829.5	6.00863		285.105	20355	5.71478
851	57817.6	44.8061		795.055	11170	6.0884		399.055	14416	5.91266		525.055	4897.5	6.00859		285.055	20640	5.71473
850	57948.3	44.8145		795.005	10950.3	6.08836		399.005	14876.7	5.91263		525.005	4869	6.00856		285.005	21373.7	5.71467
849	58078.9	44.8229		794.955	10921.3	6.08832		398.955	15321.3	5.9126		524.955	4969.5	6.00852		284.955	21708.7	5.71462
848	58179.4	44.8313		794.905	10935.7	6.08828		398.905	15837.3	5.91257		524.905	4908.5	6.00849		284.905	22320	5.71456
847	56762.4	44.8397		794.855	10772.3	6.08824		398.855	16289.3	5.91254		524.855	4903.5	6.00845		284.855	22555	5.71451
846	58450.8	44.8481		794.805	10563.7	6.08819		398.805	16619.3	5.91251		524.805	4815.5	6.00842		284.805	23162.5	5.71445
845	58048.8	44.8565		794.755	10552.3	6.08815		398.755	17046	5.91248		524.755	4849	6.00838		284.755	23447.5	5.71439
844	58893	44.8649		794.705	10536.3	6.08811		398.705	17440.7	5.91245		524.705	4855.5	6.00834		284.705	23422.5	5.71434
843	58631.7	44.8733		794.655	10478	6.08807		398.655	17512	5.91242		524.655	4835	6.00831		284.655	23960	5.71428
842	59023.6	44.8817		794.605	10438	6.08803		398.605	17944	5.91239		524.605	4807	6.00827		284.605	23661.2	5.71423
841	59234.7	44.89		794.555	10292.7	6.08799		398.555	17797.3	5.91236		524.555	4888	6.00824		284.555	23762.5	5.71417
840	58993.5	44.8984		794.505	10185.3	6.08794		398.505	17816	5.91233		524.505	4845	6.0082		284.505	23691.2	5.71411
839	59475.9	44.9068		794.455	10127.7	6.0879		398.455	17828	5.9123		524.455	4860.5	6.00817		284.455	23527.5	5.71406
838	59224.6	44.9152		794.405	10055.3	6.08786		398.405	17749.3	5.91227		524.405	4911	6.00813		284.405	23403.7	5.714
837	58109.1	44.9236		794.355	10071.3	6.08782		398.355	17462.7	5.91224		524.355	4917	6.00809		284.355	22995	5.71395
836	58611.6	44.932		794.305	9884.67	6.08778		398.305	17190	5.91221		524.305	4883	6.00806		284.305	23036.2	5.71389
835	58480.9	44.9404		794.255	9850.33	6.08773		398.255	16628.7	5.91219		524.255	4890.5	6.00802		284.255	22450	5.71384
834	56993.5	44.9488		794.205	9871.67	6.08769		398.205	16212	5.91216		524.205	4920	6.00799		284.205	21561.2	5.71378
833	57345.3	44.9572		794.155	9849	6.08765		398.155	15718.7	5.91213		524.155	4916	6.00795		284.155	21313.7	5.71372
832	57224.7	44.9656		794.105	9714	6.08761		398.105	15036.7	5.9121		524.105	4891.5	6.00791		284.105	20496.2	5.71367
831	55888	44.974		794.055	9657.67	6.08757		398.055	14338.7	5.91207		524.055	4914	6.00788		284.055	19842.5	5.71361
830	54852.9	44.9824		794.005	9657.67	6.08753		398.005	13644	5.91204		524.005	4945	6.00784		284.005	18547.5	5.71356
829	55697.1	44.9908		793.955	9620.33	6.08748		397.955	12975.3	5.91201		523.955	4903.5	6.00781		283.955	17725	5.7135
828	54350.4	44.9992		793.905	9639	6.08744		397.905	12416.7	5.91198		523.905	4885	6.00777		283.905	16910	5.71345
827	53315.2	45.0076		793.855	9623	6.0874		397.855	11648	5.91195		523.855	4882	6.00774		283.855	16146.2	5.71339
826	53757.4	45.0131		793.805	9571.67	6.08736		397.805	10910	5.91192		523.805	4877.5	6.0077		283.805	14943.7	5.71333
825	54038.8	45.0173		793.755	9608.33	6.08732		397.755	10248.7	5.91189		523.755	4889	6.00766		283.755	13867.5	5.71328
824	54099.1	45.0215		793.705	9564	6.08727		397.705	9559.33	5.91186		523.705	4911	6.00763		283.705	13055	5.71322
823	54099.1	45.0258		793.655	9449.67	6.08723		397.655	8946.67	5.91183		523.655	4824.5	6.00759		283.655	12052.5	5.71317
822	53807.7	45.03		793.605	9380.67	6.08719		397.605	8305.33	5.9118		523.605	4902.5	6.00756		283.605	11080	5.71311
821	53717.2	45.0342		793.555	9442.67	6.08715		397.555	7763.33	5.91177		523.555	4913	6.00752		283.555	10256.2	5.71305
820	54400.6	45.0384		793.505	9445.67	6.08711		397.505	7224.67	5.91174		523.505	4983	6.00749		283.505	9367.5	5.713
819	53335.3	45.0426		793.455	9374	6.08706		397.455	6690.67	5.91171		523.455	4877.5	6.00745		283.455	8316.25	5.71294
818	52571.5	45.0468		793.405	9400.33	6.08702		397.405	6338	5.91169		523.405	4868	6.00741		283.405	7545	5.71289
817	53064	45.051		793.355	9331	6.08698		397.355	6048	5.91166		523.355	4909	6.00738		283.355	6706.25	5.71283
816	53275	45.0552		793.305	9400	6.08694		397.305	5743.33	5.91163		523.305	4769	6.00734		283.305	6126.25	5.71278
815	52119.3	45.0595		793.255	9337.33	6.0869		397.255	5492.67	5.9116		523.255	4806	6.00731		283.255	5582.5	5.71272
814	52501.2	45.0637		793.205	9313.67	6.08686		397.205	5146.67	5.91157		523.205	4831	6.00727		283.205	4953.75	5.71266
813	51315.3	45.0679		793.155	9339.67	6.08681		397.155	4890	5.91154		523.155	4900	6.00723		283.155	4546.25	5.71261
812	52219.8	45.0721		793.105	9365.67	6.08677		397.105	4744.67	5.91151		523.105	4891.5	6.0072		283.105	4076.25	5.71255
811	51576.6	45.0763		793.055	9333.67	6.08673		397.055	4476.67	5.91148		523.055	4917	6.00716		283.055	3640	5.7125
810	51677.1	45.0805		793.005	9372.33	6.08669		397.005	4360	5.91145		523.005	4868.5	6.00713		283.005	3228.75	5.71244
809	51375.6	45.0847		792.955	9268	6.08665		396.955	4174	5.91142		522.955	4887	6.00709		282.955	2901.25	5.71239
808	51395.7	45.089		792.905	9302.33	6.0866		396.905	4104	5.91139		522.905	4866	6.00706		282.905	2635	5.71233
807	52048.9	45.0932		792.855	9247.33	6.08656		396.855	4031.33	5.91136		522.855	4884	6.00702		282.855	2336.25	5.71227
806	53435.8	45.0974		792.805	9283	6.08652		396.805	3992.67	5.91133		522.805	4876.5	6.00698		282.805	2232.5	5.71222
805	52702.2	45.1016		792.755	9296.67	6.08648		396.755	3851.33	5.9113		522.755	4932.5	6.00695		282.755	2007.5	5.71216
804	54089.1	45.1058		792.705	9271	6.08644		396.705	3811.33	5.91127		522.705	4878	6.00691		282.705	1837.5	5.71211
803	55697.1	45.11		792.655	9328.67	6.08639		396.655	3802	5.91124		522.655	4856.5	6.00688		282.655	1747.5	5.71205
802	56310.1	45.1142		792.605	9306	6.08635		396.605	3725.33	5.91121		522.605	4872	6.00684		282.605	1620	5.71199
801	55295.1	45.1184		792.555	9250.67	6.08631		396.555	3654.67	5.91119		522.555	4933	6.00681		282.555	1602.5	5.71194
800	54752.4	45.1227		792.505	9286.67	6.08627		396.505	3692	5.91116		522.505	4923.5	6.00677		282.505	1476.25	5.71188
799	53596.6	45.1269		792.455	9330.33	6.08623		396.455	3681.33	5.91113						282.455	1421.25	5.71183
798	54601.6	45.1311		792.405	9226.67	6.08619		396.405	3581.33	5.9111						282.405	1417.5	5.71177
797	55878	45.1353		792.355	9235.33	6.08614		396.355	3500	5.91107						282.355	1306.25	5.71172
796	57747.3	45.1395		792.305	9252	6.0861		396.305	3562	5.91104						282.305	1283.75	5.71166
795	57666.9	45.1437		792.255	9269.67	6.08606		396.255	3497.33	5.91101						282.255	1295	5.7116
794	54280	45.1479		792.205	9200	6.08602		396.205	3480	5.91098						282.205	1175	5.71155
793	48782.7	45.1521		792.155	9295.33	6.08598		396.155	3540.67	5.91095						282.155	1131.25	5.71149
792	46893.3	45.1564		792.105	9259	6.08593		396.105	3476.67	5.91092						282.105	1195	5.71144
791	45838	45.1606		792.055	9212.67	6.08589		396.055	3504	5.91089						282.055	1193.75	5.71138
790	47094.3	45.1648		792.005	9282	6.08585		396.005	3483.33	5.91086						282.005	1132.5	5.71133
789	48079.2	45.169		791.955	9285.67	6.08581		395.955	3454.67	5.91083						281.955	1118.75	5.71127
788	50189.7	45.1732		791.905	9353	6.08577		395.905	3404.67	5.9108						281.905	1110	5.71121
787	51868	45.1774		791.855	9275	6.08572		395.855	3344	5.91077						281.855	1128.75	5.71116
786	54018.7	45.176		791.805	9283.33	6.08568		395.805	3390.67	5.91074						281.805	1105	5.7111
785	54862.9	45.172		791.755	9393	6.08564		395.755	3390.67	5.91072						281.755	1108.75	5.71105
784	54048.9	45.168		791.705	9351	6.0856		395.705	3388	5.91069						281.705	1052.5	5.71099
783	54712.2	45.164		791.655	9270	6.08556		395.655	3327.33	5.91066						281.655	1077.5	5.71093
782	58812.6	45.16		791.605	9326.67	6.08552		395.605	3406.67	5.91063						281.605	1055	5.71088
781	62742.1	45.156		791.555	9325	6.08547		395.555	3411.33	5.9106						281.555	1015	5.71082
780	66420.4	45.152		791.505	9422.33	6.08543		395.505	3464.67	5.91057						281.505	1036.25	5.71077
779	61666.8	45.148		791.455	9364	6.08539		395.455	3455.33	5.91054						281.455	1111.25	5.71071
778	49516.3	45.1441		791.405	9431	6.08535		395.405	3425.33	5.91051						281.405	1090	5.71066
777	41004	45.1401		791.355	9409	6.08531		395.355	3356	5.91048						281.355	1015	5.7106
776	38782.9	45.1361		791.305	9333.33	6.08526		395.305	3382	5.91045						281.305	1007.5	5.71054
775	36984	45.1321		791.255	9421	6.08522		395.255	3370	5.91042						281.255	1020	5.71049
774	36541.8	45.1281		791.205	9439.33	6.08518		395.205	3444	5.91039						281.205	1021.25	5.71043
773	35456.4	45.1241		791.155	9472.67	6.08514		395.155	3377.33	5.91036						281.155	1000	5.71038
772	34652.4	45.1201		791.105	9481.67	6.0851		395.105	3368	5.91033						281.105	1027.5	5.71032
771	34903.6	45.1161		791.055	9500.67	6.08506		395.055	3364.67	5.9103						281.055	1037.5	5.71026
770	33878.5	45.1121		791.005	9500.67	6.08501		395.005	3421.33	5.91027						281.005	1000	5.71021
769	32732.8	45.1081		790.955	9558.33	6.08497		394.955	3352.67	5.91024						280.955	985	5.71015
768	31345.9	45.1042		790.905	9661.67	6.08493		394.905	3390	5.91022						280.905	1027.5	5.7101
767	31255.5	45.1002		790.855	9600	6.08489		394.855	3319.33	5.91019						280.855	1035	5.71004
766	30923.8	45.0962		790.805	9504.33	6.08485		394.805	3371.33	5.91016						280.805	982.5	5.70999
765	30511.8	45.0922		790.755	9561	6.0848		394.755	3374	5.91013						280.755	996.25	5.70993
764	29838.4	45.0882		790.705	9641	6.08476		394.705	3416.67	5.9101						280.705	1058.75	5.70987
763	30411.3	45.0842		790.655	9597.33	6.08472		394.655	3346	5.91007						280.655	980	5.70982
762	29717.8	45.0802		790.605	9650	6.08468		394.605	3336.67	5.91004						280.605	967.5	5.70976
761	29366.1	45.0762		790.555	9743	6.08464		394.555	3309.33	5.91001						280.555	980	5.70971
760	29295.7	45.0722		790.505	9774.67	6.08459		394.505	3410.67	5.90998						280.505	966.25	5.70965
759	29195.2	45.0682		790.455	9737	6.08455		394.455	3382.67	5.90995						280.455	1032.5	5.7096
758	29134.9	45.0643		790.405	9815.33	6.08451		394.405	3398.67	5.90992						280.405	1040	5.70954
757	29054.5	45.0603		790.355	9795	6.08447		394.355	3368	5.90989						280.355	1055	5.70948
756	29124.9	45.0563		790.305	9850	6.08443		394.305	3314.67	5.90986						280.305	1021.25	5.70943
755	29155	45.0523		790.255	9859.33	6.08439		394.255	3370	5.90983						280.255	1010	5.70937
754	28592.2	45.0483		790.205	9817	6.08434		394.205	3376.67	5.9098						280.205	965	5.70932
753	28743	45.0443		790.155	9820	6.0843		394.155	3364	5.90977						280.155	966.25	5.70926
752	28461.6	45.0403		790.105	9913	6.08426		394.105	3340	5.90974						280.105	988.75	5.7092
751	27878.7	45.0363		790.055	9897	6.08422		394.055	3377.33	5.90972						280.055	971.25	5.70915
750	28421.4	45.0323		790.005	9878.33	6.08418		394.005	3426.67	5.90969						280.005	960	5.70909
749	29205.3	45.0283		789.955	9960.33	6.08413		393.955	3359.33	5.90966						279.955	948.75	5.70904
748	29215.3	45.0244		789.905	9975.33	6.08409		393.905	3357.33	5.90963						279.905	1026.25	5.70898
747	29215.3	45.0204		789.855	9969.67	6.08405		393.855	3336	5.9096						279.855	987.5	5.70893
746	28933.9	45.0164		789.805	10060.7	6.08401		393.805	3372	5.90957						279.805	981.25	5.70887
745	29667.6	45.0124		789.755	10141.7	6.08397		393.755	3400	5.90954						279.755	980	5.70881
744	29356	45.0084		789.705	10140	6.08392		393.705	3420	5.90951						279.705	908.75	5.70876
743	29255.5	45.0044		789.655	10033.3	6.08388		393.655	3374	5.90948						279.655	931.25	5.7087
742	29205.3	45.0004		789.605	10082.3	6.08384		393.605	3352.67	5.90945						279.605	988.75	5.70865
741	29134.9	44.9964		789.555	10192.7	6.0838		393.555	3360	5.90942						279.555	946.25	5.70859
740	29557	44.9924		789.505	10139	6.08376		393.505	3308	5.90939						279.505	961.25	5.70854
739	28552	44.9884		789.455	10095	6.08372		393.455	3345.33	5.90936						279.455	963.75	5.70848
738	28743	44.9845		789.405	10133.3	6.08367		393.405	3330.67	5.90933						279.405	921.25	5.70842
737	29567.1	44.9805		789.355	10209	6.08363		393.355	3349.33	5.9093						279.355	942.5	5.70837
736	28974.1	44.9765		789.305	10180.7	6.08359		393.305	3268.67	5.90927						279.305	996.25	5.70831
735	29014.3	44.9725		789.255	10120.7	6.08355		393.255	3352	5.90924						279.255	931.25	5.70826
734	29155	44.9685		789.205	10213	6.08351		393.205	3310.67	5.90922						279.205	958.75	5.7082
733	28954	44.9645		789.155	10176.3	6.08346		393.155	3376	5.90919						279.155	950	5.70814
732	28944	44.9605		789.105	10164.7	6.08342		393.105	3340	5.90916						279.105	908.75	5.70809
731	28330.9	44.9565		789.055	10271.7	6.08338		393.055	3414.67	5.90913						279.055	911.25	5.70803
730	28059.6	44.9525		789.005	10284.3	6.08334		393.005	3357.33	5.9091						279.005	922.5	5.70798
729	28320.9	44.9485		788.955	10244.3	6.08329		392.955	3292.67	5.90907						278.955	962.5	5.70792
728	28542	44.9446		788.905	10296.3	6.08325		392.905	3290	5.90904						278.905	923.75	5.70787
727	28803.3	44.9406		788.855	10409.7	6.08321		392.855	3309.33	5.90901						278.855	966.25	5.70781
726	29094.7	44.9503		788.805	10379.7	6.08317		392.805	3386	5.90898						278.805	948.75	5.70775
725	29124.9	44.9662		788.755	10331.7	6.08312		392.755	3353.33	5.90895						278.755	937.5	5.7077
724	29486.7	44.9822		788.705	10238.3	6.08308		392.705	3336.67	5.90892						278.705	948.75	5.70764
723	30351	44.9981		788.655	10306.7	6.08304		392.655	3262	5.90889						278.655	953.75	5.70759
722	31255.5	45.014		788.605	10375.7	6.083		392.605	3287.33	5.90886						278.605	943.75	5.70753
721	31637.4	45.03		788.555	10414.7	6.08295		392.555	3396.67	5.90883						278.555	956.25	5.70748
720	31798.2	45.0459		788.505	10418.7	6.08291		392.505	3380.67	5.9088						278.505	876.25	5.70742
719	32541.9	45.0618		788.455	10486.7	6.08287		392.455	3307.33	5.90877						278.455	916.25	5.70736
718	32913.7	45.0778		788.405	10530.3	6.08283		392.405	3318.67	5.90875						278.405	915	5.70731
717	32602.2	45.0937		788.355	10476	6.08278		392.355	3381.33	5.90872						278.355	907.5	5.70725
716	32069.5	45.1096		788.305	10520.7	6.08274		392.305	3314	5.90869						278.305	936.25	5.7072
715	32170	45.1255		788.255	10506.7	6.0827		392.255	3357.33	5.90866						278.255	903.75	5.70714
714	31969	45.1415		788.205	10537.7	6.08266		392.205	3322.67	5.90863						278.205	976.25	5.70708
713	32391.1	45.1574		788.155	10590.3	6.08261		392.155	3372.67	5.9086						278.155	1005	5.70703
712	30964	45.1733		788.105	10589	6.08257		392.105	3279.33	5.90857						278.105	982.5	5.70697
711	29325.9	45.1893		788.055	10613.3	6.08253		392.055	3330	5.90854						278.055	928.75	5.70692
710	27788.2	45.2052		788.005	10652.7	6.08249		392.005	3260.67	5.90851						278.005	956.25	5.70686
709	26803.3	45.2211		787.955	10713.7	6.08244		391.955	3299.33	5.90848						277.955	931.25	5.70681
708	26501.8	45.237		787.905	10718	6.0824		391.905	3400.67	5.90845						277.905	968.75	5.70675
707	25315.9	45.253		787.855	10758.7	6.08236		391.855	3363.33	5.90842						277.855	995	5.70669
706	25366.2	45.2689		787.805	10761	6.08232		391.805	3314	5.90839						277.805	963.75	5.70664
705	25476.7	45.2848		787.755	10902.3	6.08227		391.755	3299.33	5.90836						277.755	955	5.70658
704	25114.9	45.3008		787.705	10872.7	6.08223		391.705	3312.67	5.90833						277.705	910	5.70653
703	26009.4	45.3167		787.655	10849	6.08219		391.655	3326	5.9083						277.655	927.5	5.70647
702	25888.8	45.3326		787.605	10833	6.08215		391.605	3332.67	5.90827						277.605	950	5.70642
701	25346.1	45.3485		787.555	10928.3	6.0821		391.555	3359.33	5.90825						277.555	928.75	5.70636
700	25275.7	45.3645		787.505	11011.3	6.08206		391.505	3330	5.90822						277.505	1012.5	5.7063
699	25034.5	45.3804		787.455	11065.3	6.08202		391.455	3280	5.90819
698	24481.8	45.3963		787.405	11014	6.08198		391.405	3312	5.90816
697	24200.4	45.4123		787.355	11148.7	6.08193		391.355	3297.33	5.90813
696	23667.7	45.4282		787.305	11123	6.08189		391.305	3382.67	5.9081
695	24290.8	45.4441		787.255	11151	6.08185		391.255	3284	5.90807
694	24290.8	45.4601		787.205	11192	6.08181		391.205	3357.33	5.90804
693	23185.3	45.476		787.155	11246.7	6.08176		391.155	3311.33	5.90801
692	22853.7	45.4919		787.105	11235	6.08172		391.105	3338	5.90798
691	23446.6	45.5078		787.055	11237.7	6.08168		391.055	3362	5.90795
690	23607.4	45.5238		787.005	11300.7	6.08164		391.005	3309.33	5.90792
689	23848.6	45.5397		786.955	11409.3	6.08159		390.955	3322.67	5.90789
688	22803.4	45.5556		786.905	11431.3	6.08155		390.905	3303.33	5.90786
687	22944.1	45.5716		786.855	11491.7	6.08151		390.855	3317.33	5.90783
686	23235.6	45.5875		786.805	11324.3	6.08147		390.805	3274	5.9078
685	23898.9	45.6034		786.755	11452.7	6.08142		390.755	3314.67	5.90777
684	23959.2	45.6193		786.705	11432.7	6.08138		390.705	3366.67	5.90775
683	23908.9	45.6353		786.655	11491.3	6.08134		390.655	3348.67	5.90772
682	23728	45.6512		786.605	11533.3	6.0813		390.605	3333.33	5.90769
681	23697.9	45.6671		786.555	11640.7	6.08125		390.555	3363.33	5.90766
680	23587.3	45.6831		786.505	11641.3	6.08121		390.505	3337.33	5.90763
679	23818.5	45.699		786.455	11584	6.08117
678	23677.8	45.7149		786.405	11559.3	6.08113
677	23074.8	45.7308		786.355	11676.7	6.08108
676	23778.3	45.7347		786.305	11716.3	6.08104
675	23697.9	45.733		786.255	11694.3	6.081
674	23366.2	45.7314		786.205	11678.7	6.08096
673	24401.4	45.7297		786.155	11744.7	6.08091
672	23506.9	45.7281		786.105	11743.3	6.08087
671	24039.6	45.7264		786.055	11711	6.08083
670	24130	45.7248		786.005	11827.7	6.08079
669	24099.9	45.7231		785.955	11746.3	6.08074
668	23657.7	45.7215		785.905	11735	6.0807
667	23758.2	45.7199		785.855	11644	6.08066
666	23537.1	45.7182		785.805	11600	6.08062
665	23215.5	45.7166		785.755	11756	6.08057
664	23868.7	45.7149		785.705	11696	6.08053
663	24140.1	45.7133		785.655	11663.3	6.08049
662	24270.7	45.7116		785.605	11733	6.08045
661	23748.1	45.71		785.555	11682	6.0804
660	23225.5	45.7083		785.505	11514	6.08036
659	24109.9	45.7067		785.455	11524.7	6.08032
658	24140.1	45.7051		785.405	11598	6.08028
657	24079.8	45.7034		785.355	11502	6.08023
656	23396.4	45.7018		785.305	11526.3	6.08019
655	24089.8	45.7001		785.255	11484	6.08015
654	24019.5	45.6985		785.205	11431.7	6.08011
653	24351.1	45.6968		785.155	11365.7	6.08006
652	24984.3	45.6952		785.105	11309.3	6.08002
651	24833.5	45.6935		785.055	11408.3	6.07998
650	23878.8	45.6919		785.005	11315.7	6.07994
649	23758.2	45.6903		784.955	11200.7	6.07989
648	24130	45.6886		784.905	11132	6.07985
647	24542.1	45.687		784.855	11204.7	6.07981
646	23959.2	45.6853		784.805	11140	6.07977
645	24079.8	45.6837		784.755	11155.7	6.07972
644	24913.9	45.682		784.705	11109.3	6.07968
643	24190.3	45.6804		784.655	11102	6.07964
642	23898.9	45.6787		784.605	11081.3	6.0796
641	23908.9	45.6771		784.555	11016	6.07955
640	24451.6	45.6755		784.505	10972.7	6.07951
639	24984.3	45.6738		784.455	10982	6.07947
638	24582.3	45.6722		784.405	10987.7	6.07943
637	24190.3	45.6705		784.355	10986.3	6.07938
636	24150.1	45.6689		784.305	10935.7	6.07934
635	23828.5	45.6672		784.255	10983.7	6.0793
634	23868.7	45.6656		784.205	10991	6.07926
633	24662.7	45.6639		784.155	11015	6.07921
632	24662.7	45.6623		784.105	11088.7	6.07917
631	24692.8	45.6607		784.055	10965.7	6.07913
630	24310.9	45.659		784.005	11056.3	6.07909
629	25054.6	45.6574		783.955	11013.7	6.07904
628	23888.8	45.6557		783.905	11006	6.079
627	24773.2	45.6541		783.855	11020	6.07896
626	24924	45.6524		783.805	11009.3	6.07892
625	23969.2	45.6508		783.755	11126	6.07887
624	24351.1	45.6491		783.705	11206.7	6.07883
623	24823.5	45.6475		783.655	11165.3	6.07879
622	24401.4	45.6459		783.605	11138.7	6.07875
621	24702.9	45.6442		783.555	11288.7	6.0787
620	24491.8	45.6426		783.505	11234	6.07866
619	24501.9	45.6409		783.455	11296	6.07862
618	25376.2	45.6393		783.405	11395	6.07858
617	25305.9	45.6376		783.355	11425.7	6.07853
616	26632.5	45.6508		783.305	11497.3	6.07849
615	24934	45.6707		783.255	11604	6.07845
614	24039.6	45.6906		783.205	11616	6.07841
613	24642.6	45.7105		783.155	11659.3	6.07836
612	25436.5	45.7304		783.105	11720	6.07832
611	25135	45.7503		783.055	11773.7	6.07828
610	24793.3	45.7701		783.005	11856.3	6.07824
609	25175.2	45.79		782.955	11989.3	6.07819
608	24662.7	45.8099		782.905	12087.7	6.07815
607	25014.4	45.8298		782.855	12050.7	6.07811
606	25637.5	45.8497		782.805	12176.3	6.07807
605	25084.8	45.8695		782.755	12362.3	6.07802
604	25908.9	45.8894		782.705	12349	6.07798
603	25436.5	45.9093		782.655	12397	6.07794
602	25165.2	45.9292		782.605	12560	6.0779
601	24833.5	45.9491		782.555	12675.3	6.07785
600	25305.9	45.969		782.505	12620	6.07781
599	25125	45.9888		782.455	12711	6.07777
598	25135	46.0087		782.405	12917	6.07773
597	25346.1	46.0286		782.355	12971.3	6.07768
596	25617.4	46.0485		782.305	13113.3	6.07764
595	25285.8	46.0684		782.255	13180	6.0776
594	25436.5	46.0883		782.205	13276	6.07756
593	25205.4	46.1081		782.155	13384.3	6.07751
592	25577.2	46.128		782.105	13519.3	6.07747
591	25235.5	46.1479		782.055	13591	6.07743
590	25195.3	46.1678		782.005	13686	6.07739
589	25114.9	46.1877		781.955	13848.7	6.07734
588	25707.9	46.2076		781.905	13936.3	6.0773
587	25567.2	46.2274		781.855	14053.3	6.07726
586	25366.2	46.2473		781.805	14075.7	6.07722
585	25567.2	46.2672		781.755	14139.3	6.07717
584	25687.8	46.2871		781.705	14157.7	6.07713
583	24763.2	46.307		781.655	14336	6.07709
582	25878.7	46.3268		781.605	14496	6.07705
581	25667.7	46.3467		781.555	14494.3	6.077
580	25506.9	46.3666		781.505	14674.7	6.07696
579	25969.2	46.3865		781.455	14740.7	6.07692
578	25657.6	46.4064		781.405	14754.3	6.07688
577	26180.2	46.4263		781.355	14874	6.07683
576	26019.4	46.4177		781.305	14889.7	6.07679
575	25748.1	46.3965		781.255	14914.3	6.07675
574	25537	46.3752		781.205	15065	6.07671
573	26562.1	46.3539		781.155	15128.7	6.07666
572	26019.4	46.3326		781.105	15097	6.07662
571	26029.5	46.3113		781.055	15237.3	6.07658
570	25537	46.2901		781.005	15190	6.07654
569	25768.2	46.2688		780.955	15277	6.07649
568	25637.5	46.2475		780.905	15408.7	6.07645
567	26521.9	46.2262		780.855	15353.7	6.07641
566	26019.4	46.2049		780.805	15369.3	6.07637
565	25637.5	46.1836		780.755	15256.3	6.07632
564	25959.1	46.1624		780.705	15231.3	6.07628
563	26381.2	46.1411		780.655	15241	6.07624
562	26320.9	46.1198		780.605	15248.7	6.0762
561	26883.7	46.0985		780.555	15209.3	6.07615
560	26481.7	46.0772		780.505	15141.7	6.07611
559	26552.1	46.056		780.455	15120	6.07607
558	26270.7	46.0347		780.405	15045	6.07603
557	25597.3	46.0134		780.355	14841.3	6.07598
556	26853.6	45.9921		780.305	14767	6.07594
555	26783.2	45.9708		780.255	14584.7	6.0759
554	27476.7	45.9495		780.205	14437.7	6.07586
553	26652.6	45.9283		780.155	14284	6.07581
552	27165.1	45.907		780.105	14112.7	6.07577
551	26511.9	45.8857		780.055	13883	6.07573
550	25215.4	45.8644		780.005	13709.3	6.07569
549	25908.9	45.8431		779.955	13450	6.07564
548	26491.8	45.8219		779.905	13294	6.0756
547	26471.7	45.8006		779.855	13080	6.07556
546	26592.3	45.7793		779.805	12811.3	6.07552
545	25878.7	45.758		779.755	12573	6.07547
544	26602.3	45.7367		779.705	12346	6.07543
543	25969.2	45.7155		779.655	12056.3	6.07539
542	24773.2	45.6942		779.605	11736.3	6.07535
541	24893.8	45.6729		779.555	11597.3	6.0753
540	25114.9	45.6516		779.505	11302.3	6.07526
539	25084.8	45.6303		779.455	11077.3	6.07522
538	25145.1	45.609		779.405	10833.3	6.07518
537	24511.9	45.5878		779.355	10631.7	6.07513
536	24421.5	45.5665		779.305	10420.7	6.07509
535	25848.6	45.5452		779.255	10200.7	6.07505
534	27727.9	45.5239		779.205	10000.3	6.07501
533	30200.2	45.5026		779.155	9767.67	6.07496
532	36441.3	45.4814		779.105	9651.67	6.07492
531	45456.1	45.4601		779.055	9461.67	6.07488
530	46280.2	45.4388		779.005	9324.33	6.07484
529	36772.9	45.4175		778.955	9183	6.07479
528	27617.4	45.3962		778.905	8960.67	6.07475
527	24572.2	45.3749		778.855	8913	6.07471
526	23999.4	45.3537		778.805	8815.67	6.07467
525	23647.6	45.3324		778.755	8712.67	6.07462
524	23305.9	45.3111		778.705	8657.67	6.07458
523	23376.3	45.2898		778.655	8603.67	6.07454
522	23064.7	45.2685		778.605	8449	6.0745
521	23446.6	45.2473		778.555	8368.67	6.07445
520	23084.8	45.226		778.505	8335	6.07441
519	23145.1	45.2047		778.455	8296.67	6.07437
518	23386.3	45.1834		778.405	8252	6.07433
517	23225.5	45.1621		778.355	8173.33	6.07428
516	23295.9	45.1598		778.305	8188.33	6.07424
515	23647.6	45.166		778.255	8153.67	6.0742
514	23155.2	45.1722		778.205	8088.67	6.07416
513	22903.9	45.1784		778.155	8010	6.07411
512	23115	45.1846		778.105	7990.67	6.07407
511	23838.6	45.1908		778.055	7904	6.07403
510	24321	45.197		778.005	7987	6.07399
509	23456.7	45.2032		777.955	7930.33	6.07394
508	23024.5	45.2095		777.905	7930.67	6.0739
507	23285.8	45.2157		777.855	7943.33	6.07386
506	23567.2	45.2219		777.805	7839.33	6.07382
505	22924	45.2281		777.755	7808	6.07377
504	23336.1	45.2343		777.705	7799.67	6.07373
503	23808.4	45.2405		777.655	7824	6.07369
502	23295.9	45.2467		777.605	7834	6.07365
501	23808.4	45.2529		777.555	7816.33	6.0736
500	23818.5	45.2591		777.505	7793.67	6.07356
499	23336.1	45.2653		777.455	7761.33	6.07352
498	23838.6	45.2715		777.405	7712.67	6.07348
497	23527	45.2777		777.355	7680.33	6.07343
496	23969.2	45.2839		777.305	7737.67	6.07339
495	23376.3	45.2901		777.255	7714	6.07335
494	23456.7	45.2963		777.205	7717	6.07331
493	23868.7	45.3025		777.155	7709	6.07326
492	24180.3	45.3087		777.105	7685.33	6.07322
491	24341.1	45.3149		777.055	7702.67	6.07318
490	23567.2	45.3211		777.005	7678.67	6.07314
489	22984.3	45.3273		776.955	7558.67	6.07309
488	24240.6	45.3335		776.905	7627.33	6.07305
487	23908.9	45.3397		776.855	7646.67	6.07301
486	23768.2	45.3459		776.805	7648.67	6.07297
485	23195.4	45.3521		776.755	7641.33	6.07292
484	23125	45.3583		776.705	7646.67	6.07288
483	23356.2	45.3645		776.655	7693.33	6.07284
482	23205.4	45.3708		776.605	7642	6.0728
481	23054.7	45.377		776.555	7577	6.07275
480	23718	45.3832		776.505	7625.33	6.07271
479	24361.2	45.3894		776.455	7596	6.07267
478	23517	45.3956		776.405	7593.33	6.07263
477	23718	45.4018		776.355	7566	6.07258
476	23517	45.4151		776.305	7490	6.07254
475	23878.8	45.4317		776.255	7565.67	6.0725
474	23949.1	45.4482		776.205	7509.67	6.07246
473	24451.6	45.4648		776.155	7539.67	6.07241
472	23436.6	45.4814		776.105	7550	6.07237
471	24170.2	45.4979		776.055	7562.33	6.07233
470	23848.6	45.5145		776.005	7600.67	6.07229
469	23858.7	45.531		775.955	7500	6.07224
468	23888.8	45.5476		775.905	7398.67	6.0722
467	24069.7	45.5642		775.855	7539	6.07216
466	24089.8	45.5807		775.805	7512.33	6.07212
465	23758.2	45.5973		775.755	7479.67	6.07207
464	24059.7	45.6139		775.705	7487.67	6.07203
463	24602.4	45.6304		775.655	7400	6.07199
462	25245.6	45.647		775.605	7423	6.07195
461	24662.7	45.6635		775.555	7465.67	6.0719
460	24250.6	45.6801		775.505	7369	6.07186
459	24039.6	45.6967		775.455	7437.33	6.07182
458	24371.2	45.7132		775.405	7494	6.07178
457	25205.4	45.7298		775.355	7557	6.07173
456	24461.7	45.7463		775.305	7439.67	6.07169
455	24321	45.7629		775.255	7426.33	6.07165
454	24461.7	45.7795		775.205	7445.67	6.07161
453	24280.8	45.796		775.155	7368	6.07156
452	23597.4	45.8126		775.105	7380.33	6.07152
451	23748.1	45.8291		775.055	7440.33	6.07148
450	23929	45.8457		775.005	7424.33	6.07144
449	24411.4	45.8623		774.955	7323	6.07139
448	24160.2	45.8788		774.905	7387.67	6.07135
447	24170.2	45.8954		774.855	7344	6.07131
446	24190.3	45.9119		774.805	7452.33	6.07127
445	24562.2	45.9285		774.755	7394.67	6.07122
444	23848.6	45.9451		774.705	7391.33	6.07118
443	23838.6	45.9616		774.655	7399.33	6.07114
442	24240.6	45.9782		774.605	7330.67	6.0711
441	24069.7	45.9947		774.555	7277.67	6.07105
440	23959.2	46.0113		774.505	7313.33	6.07101
439	24260.7	46.0279		774.455	7357	6.07097
438	23768.2	46.0444		774.405	7299	6.07093
437	23758.2	46.061		774.355	7339.67	6.07088
436	24562.2	46.0775		774.305	7241	6.07084
435	24994.3	46.0941		774.255	7228.33	6.0708
434	24140.1	46.1107		774.205	7322.67	6.07076
433	24099.9	46.1272		774.155	7293	6.07071
432	23929	46.1438		774.105	7281.67	6.07067
431	24270.7	46.1603		774.055	7210.33	6.07063
430	24270.7	46.1769		774.005	7239.33	6.07059
429	24069.7	46.1935		773.955	7258.67	6.07054
428	23758.2	46.21		773.905	7248.33	6.0705
427	23707.9	46.2266		773.855	7283.67	6.07046
426	24723	46.2543		773.805	7245.67	6.07042
425	24290.8	46.287		773.755	7221.67	6.07037
424	24461.7	46.3198		773.705	7258	6.07033
423	24381.3	46.3525		773.655	7240.33	6.07029
422	24753.1	46.3852		773.605	7205	6.07025
421	24823.5	46.418		773.555	7231.33	6.0702
420	24371.2	46.4507		773.505	7183	6.07016
419	24200.4	46.4834		773.455	7184.67	6.07012
418	24099.9	46.5162		773.405	7204	6.07008
417	24210.4	46.5489		773.355	7283	6.07003
416	24461.7	46.5816		773.305	7269	6.06999
415	23064.7	46.6143		773.255	7258.67	6.06995
414	21949.2	46.6471		773.205	7204.33	6.06991
413	22532.1	46.6798		773.155	7176	6.06986
412	21798.4	46.7125		773.105	7125.67	6.06982
411	21748.2	46.7453		773.055	7152.67	6.06978
410	20964.3	46.778		773.005	7130.33	6.06974
409	20813.5	46.8107		772.955	7135	6.06969
408	20100	46.8435		772.905	7184.33	6.06965
407	21547.2	46.8762		772.855	7074.67	6.06961
406	22954.2	46.9089		772.805	7102.67	6.06957
405	24331	46.9417		772.755	7081	6.06952
404	22371.3	46.9744		772.705	7054.67	6.06948
403	20280.9	47.0071		772.655	7078	6.06944
402	20723.1	47.0398		772.605	7147.33	6.0694
401	23748.1	47.0726		772.555	7100	6.06935
400	29245.5	47.1053		772.505	7103.33	6.06931
399	40350.7	47.138
398	52018.8	47.1708
397	50109.3	47.2035
396	32722.8	47.2362
395	19557.3	47.269
394	16331.2	47.3017
393	16019.7	47.3344
392	15426.7	47.3672
391	15688	47.3999
390	16200.6	47.4326
389	15848.8	47.4653
388	15627.7	47.4981
387	15698.1	47.5308
386	15547.3	47.4911
385	15698.1	47.4189
384	15788.5	47.3468
383	15708.1	47.2746
382	15798.6	47.2024
381	15497.1	47.1302
380	16009.6	47.058
379	15879	46.9858
378	15798.6	46.9136
377	15547.3	46.8414
376	15667.9	46.7692
375	15657.9	46.697
374	15979.5	46.6248
373	15517.2	46.5526
372	15788.5	46.4804
371	16160.4	46.4082
370	16572.4	46.336
369	16260.9	46.2638
368	16572.4	46.1916
367	16391.5	46.1195
366	16451.8	46.0473
365	15778.5	45.9751
364	14904.1	45.9029
363	15688	45.8307
362	16160.4	45.7585
361	15899.1	45.6863
360	16039.8	45.6141
359	15808.6	45.5419
358	15547.3	45.4697
357	16100.1	45.3975
356	16281	45.3253
355	16391.5	45.2531
354	16270.9	45.1809
353	16341.3	45.1087
352	16632.7	45.0365
351	16281	44.9643
350	15366.4	44.8922
349	15738.3	44.82
348	16592.5	44.7478
347	16381.5	44.6756
346	16250.8	44.6034
345	16200.6	44.5312
344	16441.8	44.459
343	16451.8	44.3868
342	16843.8	44.3146
341	16532.2	44.2424
340	16703.1	44.1702
339	16884	44.098
338	16140.3	44.0258
337	16321.2	43.9536
336	16291	43.8814
335	16361.4	43.8092
334	16532.2	43.7371
333	16240.8	43.6649
332	16361.4	43.5927
331	16743.3	43.5205
330	15959.4	43.4483
329	16833.7	43.3761
328	16230.7	43.3039
327	16723.2	43.2317
326	17064.9	43.1595
325	16693	43.0873
324	16843.8	43.0151
323	16713.1	42.9429
322	16984.5	42.8707
321	16090	42.7985
320	16813.6	42.7263
319	17115.1	42.6541
318	16914.1	42.5819
317	16964.4	42.5098
316	16632.7	42.4376
315	16270.9	42.3654
314	16250.8	42.2932
313	16853.8	42.221
312	17054.8	42.1488
311	16904.1	42.0766
310	17698	42.0044
309	17788.5	41.9322
308	17436.7	41.86
307	17255.8	41.7878
306	17255.8	41.7156
305	17296	41.6434
304	17235.7	41.5712
303	15808.6	41.499
302	15637.8	41.4268
301	14904.1	41.3547
300	14773.5	41.2825
299	13929.3	41.2103
298	12602.7	41.1381
297	11979.6	41.0659
296	11658	41.039
295	11567.5	41.0325
294	11446.9	41.026
293	11477.1	41.0195
292	11788.6	41.013
291	12612.7	41.0066
290	12683.1	41.0001
289	13065	40.9936
288	14120.2	40.9871
287	17959.3	40.9806
286	27215.4	40.9741
285	42732.6	40.9676
284	60661.8	40.9611
283	60289.9	40.9546
282	35818.2	40.9481
281	13426.8	40.9416
280	6673.2	40.9351
279	5607.9	40.9286
278	5035.05	40.9222
277	4522.5	40.9157
276	4301.4	40.9092
275	4271.25	40.9027
274	4080.3	40.8962
273	4160.7	40.8897
272	4401.9	40.8832
271	4472.25	40.8767
270	4442.1	40.8702
269	4502.4	40.8637
268	4422	40.8572
267	4532.55	40.8507
266	4100.4	40.8442
265	4130.55	40.8377
264	4341.6	40.8313
263	4512.45	40.8248
262	4100.4	40.8183
261	3979.8	40.8118
260	3949.65	40.8053
259	4221	40.7988
258	4130.55	40.7923
257	3969.75	40.7858
256	4020	40.7793
255	4150.65	40.7728
254	3929.55	40.7663
253	4190.85	40.7598
252	4271.25	40.7533
251	4140.6	40.7469
250	4241.1	40.7404
249	4200.9	40.7339
248	4653.15	40.7274
247	4361.7	40.7209
246	4160.7	40.7057
245	4110.45	40.6865
244	4381.8	40.6674
243	4411.95	40.6483
242	3979.8	40.6292
241	3959.7	40.61
240	4160.7	40.5909
239	4663.2	40.5718
238	4612.95	40.5526
237	4673.25	40.5335
236	4271.25	40.5144
235	4241.1	40.4953
234	4050.15	40.4761
233	4040.1	40.457
232	4140.6	40.4379
231	4351.65	40.4187
230	4442.1	40.3996
229	4311.45	40.3805
228	3869.25	40.3613
227	4040.1	40.3422
226	4462.2	40.3231
225	4291.35	40.304
224	4291.35	40.2848
223	3989.85	40.2657
222	4090.35	40.2466
221	4221	40.2274
220	4331.55	40.2083
219	4512.45	40.1892
218	4271.25	40.1701
217	4321.5	40.1509
216	4130.55	40.1318
215	4251.15	40.1127
214	4231.05	40.0935
213	4070.25	40.0744
212	4150.65	40.0553
211	4261.2	40.0361
210	4231.05	40.017
209	4261.2	39.9979
208	4291.35	39.9788
207	4210.95	39.9596
206	4231.05	39.9405
205	4241.1	39.9214
204	4190.85	39.9022
203	4341.6	39.8831
202	4401.9	39.864
201	4341.6	39.8449
200	4110.45	39.8257
199	4140.6	39.8066
198	3939.6	39.7875
197	4210.95	39.7683
196	4351.65	39.7492
195	4321.5	39.7301
194	4361.7	39.7109
193	4241.1	39.6918
192	4502.4	39.6727
191	4401.9	39.6536
190	4492.35	39.6344
189	4180.8	39.6153
188	4411.95	39.5962
187	4582.8	39.577
186	4462.2	39.551
185	4281.3	39.522
184	4683.3	39.4929
183	4462.2	39.4638
182	4210.95	39.4347
181	3989.85	39.4056
180	4321.5	39.3766
179	4271.25	39.3475
178	4361.7	39.3184
177	4432.05	39.2893
176	4291.35	39.2602
175	4241.1	39.2311
174	4663.2	39.2021
173	4673.25	39.173
172	4180.8	39.1439
171	4241.1	39.1148
170	4693.35	39.0857
169	4311.45	39.0566
168	4361.7	39.0276
167	4090.35	38.9985
166	4602.9	38.9694
165	4773.75	38.9403
164	4472.25	38.9112
163	4281.3	38.8822
162	4703.4	38.8531
161	4341.6	38.824
160	4572.75	38.7949
159	4442.1	38.7658
158	4331.55	38.7367
157	4351.65	38.7077
156	4432.05	38.6786
155	4713.45	38.6495
154	4381.8	38.6204
153	4090.35	38.5913
152	4422	38.5622
151	4763.7	38.5332
150	4723.5	38.5041
149	4653.15	38.475
148	4411.95	38.4459
147	4904.4	38.4168
146	4793.85	38.3878
145	4733.55	38.3587
144	4452.15	38.3296
143	4492.35	38.3005
142	4824	38.2714
141	4643.1	38.2423
140	4472.25	38.2133
139	4683.3	38.1842
138	4512.45	38.1551
137	4210.95	38.126
136	4432.05	38.0969
135	4542.6	38.0679
134	4864.2	38.0388
133	4391.85	38.0097
132	4361.7	37.9806
131	4401.9	37.9515
130	4592.85	37.9122
129	4612.95	37.8683
128	4482.3	37.8244
127	4562.7	37.7805
126	4974.75	37.7367
125	4552.65	37.6928
124	4592.85	37.6489
123	4582.8	37.605
122	4462.2	37.5611
121	4241.1	37.5172
120	4411.95	37.4733
119	4221	37.4294
118	4482.3	37.3855
117	4602.9	37.3416
116	4582.8	37.2977
115	4271.25	37.2539
114	4623	37.21
113	4602.9	37.1661
112	4522.5	37.1222
111	4482.3	37.0783
110	4452.15	37.0344
109	4864.2	36.9905
108	5135.55	36.9466
107	5286.3	36.9027
106	5145.6	36.8588
105	5366.7	36.8149
104	5155.65	36.7711
103	5105.4	36.7272
102	5648.1	36.6833
101	5507.4	36.6394
100	5105.4	36.5955
99	4462.2	36.5516
98	4341.6	36.5077
97	3859.2	36.4638
96	3748.65	36.4199
95	3798.9	36.376
94	3396.9	36.3321
93	3618	36.2883
92	3577.8	36.2444
91	3849.15	36.2005
90	3768.75	36.1566
89	3899.4	36.1127
88	4020	36.0688
87	3748.65	36.0249
86	3798.9	35.981
85	3718.5	35.9371
84	4100.4	35.8932
83	4070.25	35.8493
82	4009.95	35.8055
81	4221	35.7616
80	4221	35.7177
79	3718.5	35.6738
78	3628.05	35.6299
77	3577.8	35.586
76	3557.7	35.5421
75	3185.85	35.4982
74	3537.6	35.4543
73	3537.6	35.4104
72	3396.9	35.3665
71	3607.95	35.3227
70	3567.75	35.2788
69	3607.95	35.2349
68	3758.7	35.191
67	4050.15	35.1471
66	4090.35	35.1032
65	4231.05	35.0593
64	4673.25	35.0154
63	5195.85	34.9715
62	5447.1	34.9276
61	5989.8	34.8837
60	6442.05	34.8399
59	5537.55	34.796
58	3698.4	34.7521
57	2472.3	34.7082
56	1708.5	34.6643
55	1587.9	34.6204
54	1527.6	34.5765
53	1537.65	34.5326
52	1507.5	34.4887
51	1457.25	34.4448
50	1396.95	34.4009
49	1547.7	34.3571
48	1537.65	34.3132
47	1557.75	34.2693
46	1587.9	34.2254
45	1618.05	34.1815
44	1587.9	34.1376
43	1497.45	34.0937
42	1597.95	34.0498
41	1708.5	34.0059
40	1457.25	33.962
39	1547.7	33.9181
38	1437.15	33.8743
37	1457.25	33.8304
36	1658.25	33.7865
35	1547.7	33.7426
34	1537.65	33.6987
33	1618.05	33.6548
32	1477.35	33.6109
31	1407	33.567
30	1688.4	33.5231
29	1648.2	33.4792
28	1477.35	33.4353
27	1628.1	33.3915
26	1628.1	33.3476
25	1758.75	33.3037
24	1889.4	33.2598
23	1979.85	33.2159
22	1909.5	33.172
21	1768.8	33.1281
20	1567.8	33.0842
19	1567.8	33.0403
18	1537.65	32.9964
17	1396.95	32.9525
16	1557.75	32.9087
15	1457.25	32.8648
14	1396.95	32.8209
13	1587.9	32.777
12	1567.8	32.7331
11	1698.45	32.6892
10	1447.2	32.6453
9	1145.7	32.6014
8	1115.55	32.5575
7	1175.85	32.5136
6	1246.2	32.4697
5	1296.45	32.4259
4	1427.1	32.382
3	1628.1	32.3381
2	1467.3	32.2942
1	1135.65	32.2503
0	562.8	32.2064
-1	180.9	32.1625
-2	70.35	32.1186
-3	30.15	32.0747
-4	20.1	32.0308
-5	0	31.9869

## Sheet: XPS-CC-CoNi-MOF@NH-2
Survey				Co 2P				Ni 2P				N1s				O1s				C1s
Binding energy (eV)	Counts per second	Trans Fn		Binding energy (eV)	Counts per second	Trans Fn		Binding energy (eV)	Counts per second	Trans Fn		Binding energy (eV)	Counts per second	Trans Fn		Binding energy (eV)	Counts per second	Trans Fn		Binding energy (eV)	Counts per second	Trans Fn
1200	120690	43.7681		812.438	22740.7	6.10301		892.438	31062	6.13794		416.438	2690.67	5.92292		542.438	4682	6.02108		302.438	2753.33	5.73699
1199	119937	43.7584		812.388	22616	6.10297		892.388	31040.3	6.13791		416.388	2675.67	5.92289		542.388	4496	6.02105		302.388	2767.33	5.7369
1198	119997	43.7488		812.338	22738.7	6.10293		892.338	30989	6.13788		416.338	2721	5.92286		542.338	4552	6.02101		302.338	2795.33	5.7368
1197	120389	43.7392		812.288	22718.3	6.10289		892.288	31066	6.13785		416.288	2678	5.92283		542.288	4486	6.02098		302.288	2745.33	5.7367
1196	121997	43.7296		812.238	22693.3	6.10285		892.238	30967.3	6.13782		416.238	2671.67	5.9228		542.238	4490	6.02094		302.238	2730.67	5.7366
1195	121344	43.7199		812.188	22688	6.1028		892.188	31000	6.13779		416.188	2689.67	5.92277		542.188	4530	6.0209		302.188	2731.33	5.7365
1194	122469	43.7103		812.138	22773.7	6.10276		892.138	30988.7	6.13777		416.138	2694.33	5.92274		542.138	4408	6.02087		302.138	2792.67	5.73641
1193	121575	43.7007		812.088	22729.3	6.10272		892.088	31086.7	6.13774		416.088	2698	5.92271		542.088	4654	6.02083		302.088	2788.67	5.73631
1192	122650	43.6911		812.038	22541.3	6.10268		892.038	31100	6.13771		416.038	2661	5.92268		542.038	4446	6.0208		302.038	2754	5.73621
1191	121163	43.6814		811.988	22552.7	6.10264		891.988	31016	6.13768		415.988	2672	5.92265		541.988	4486	6.02076		301.988	2803.33	5.73611
1190	122429	43.6718		811.938	22673	6.1026		891.938	31270	6.13765		415.938	2688.67	5.92262		541.938	4440	6.02073		301.938	2784	5.73601
1189	121947	43.6622		811.888	22766.3	6.10255		891.888	31079.7	6.13762		415.888	2672	5.92259		541.888	4612	6.02069		301.888	2682	5.73592
1188	122047	43.6526		811.838	22709.3	6.10251		891.838	31042.7	6.1376		415.838	2644	5.92256		541.838	4504	6.02065		301.838	2764.67	5.73582
1187	122670	43.6429		811.788	22690.7	6.10247		891.788	31077.3	6.13757		415.788	2680.67	5.92253		541.788	4498	6.02062		301.788	2736	5.73572
1186	121384	43.6333		811.738	22548.3	6.10243		891.738	30861.7	6.13754		415.738	2701	5.92251		541.738	4678	6.02058		301.738	2766	5.73562
1185	122520	43.6237		811.688	22696	6.10239		891.688	30992	6.13751		415.688	2653	5.92248		541.688	4526	6.02055		301.688	2710.67	5.73552
1184	123283	43.6141		811.638	22745.7	6.10234		891.638	30994.3	6.13748		415.638	2662.33	5.92245		541.638	4558	6.02051		301.638	2719.33	5.73543
1183	122288	43.6044		811.588	22725	6.1023		891.588	30867	6.13745		415.588	2681.67	5.92242		541.588	4490	6.02047		301.588	2764	5.73533
1182	120922	43.5948		811.538	22626.7	6.10226		891.538	30980.3	6.13742		415.538	2649.33	5.92239		541.538	4576	6.02044		301.538	2795.33	5.73523
1181	121635	43.5852		811.488	22543.7	6.10222		891.488	30952	6.1374		415.488	2682.67	5.92236		541.488	4474	6.0204		301.488	2758.67	5.73513
1180	122761	43.5756		811.438	22686.3	6.10218		891.438	30905.3	6.13737		415.438	2673.33	5.92233		541.438	4534	6.02037		301.438	2750	5.73503
1179	121716	43.5659		811.388	22559	6.10213		891.388	30870.3	6.13734		415.388	2682	5.9223		541.388	4330	6.02033		301.388	2755.33	5.73494
1178	123645	43.5563		811.338	22861.7	6.10209		891.338	30873.7	6.13731		415.338	2661.33	5.92227		541.338	4432	6.0203		301.338	2737.33	5.73484
1177	123545	43.5467		811.288	22637.3	6.10205		891.288	30865.7	6.13728		415.288	2633.67	5.92224		541.288	4476	6.02026		301.288	2700	5.73474
1176	124248	43.5462		811.238	22669.7	6.10201		891.238	31006.3	6.13725		415.238	2678.67	5.92221		541.238	4498	6.02022		301.238	2733.33	5.73464
1175	123957	43.5497		811.188	22591	6.10197		891.188	30921.7	6.13723		415.188	2702	5.92218		541.188	4410	6.02019		301.188	2732	5.73454
1174	123424	43.5533		811.138	22648.7	6.10193		891.138	30942	6.1372		415.138	2680.67	5.92215		541.138	4462	6.02015		301.138	2750	5.73445
1173	124871	43.5569		811.088	22582.3	6.10188		891.088	30935.3	6.13717		415.088	2691.33	5.92212		541.088	4578	6.02012		301.088	2720	5.73435
1172	123766	43.5604		811.038	22653.3	6.10184		891.038	30900.3	6.13714		415.038	2701.67	5.92209		541.038	4668	6.02008		301.038	2712.67	5.73425
1171	124349	43.564		810.988	22633	6.1018		890.988	30979	6.13711		414.988	2685.33	5.92206		540.988	4462	6.02005		300.988	2745.33	5.73415
1170	124640	43.5676		810.938	22668.3	6.10176		890.938	30859.7	6.13708		414.938	2705.67	5.92203		540.938	4532	6.02001		300.938	2733.33	5.73405
1169	124640	43.5711		810.888	22615	6.10172		890.888	30945	6.13706		414.888	2674.67	5.92201		540.888	4492	6.01997		300.888	2726.67	5.73396
1168	123424	43.5747		810.838	22653.3	6.10167		890.838	30870.7	6.13703		414.838	2668	5.92198		540.838	4462	6.01994		300.838	2686	5.73386
1167	123454	43.5783		810.788	22584.7	6.10163		890.788	30860.3	6.137		414.788	2680	5.92195		540.788	4464	6.0199		300.788	2718	5.73376
1166	122771	43.5818		810.738	22585.7	6.10159		890.738	30779.7	6.13697		414.738	2722.33	5.92192		540.738	4380	6.01987		300.738	2726	5.73366
1165	123806	43.5854		810.688	22504	6.10155		890.688	30854.7	6.13694		414.688	2700	5.92189		540.688	4468	6.01983		300.688	2779.33	5.73356
1164	125746	43.589		810.638	22582.7	6.10151		890.638	30970	6.13691		414.638	2673.67	5.92186		540.638	4422	6.01979		300.638	2744.67	5.73347
1163	124560	43.5925		810.588	22677.7	6.10147		890.588	30880.7	6.13689		414.588	2650.67	5.92183		540.588	4438	6.01976		300.588	2721.33	5.73337
1162	124208	43.5961		810.538	22651.7	6.10142		890.538	30809.7	6.13686		414.538	2689	5.9218		540.538	4432	6.01972		300.538	2692	5.73327
1161	124479	43.5997		810.488	22522.7	6.10138		890.488	30880.7	6.13683		414.488	2669	5.92177		540.488	4510	6.01969		300.488	2760	5.73317
1160	124932	43.6032		810.438	22548	6.10134		890.438	30805.3	6.1368		414.438	2653.67	5.92174		540.438	4568	6.01965		300.438	2744	5.73307
1159	125605	43.6068		810.388	22522	6.1013		890.388	30909.7	6.13677		414.388	2698.67	5.92171		540.388	4528	6.01962		300.388	2731.33	5.73298
1158	124720	43.6104		810.338	22497	6.10126		890.338	30922	6.13674		414.338	2639.33	5.92168		540.338	4518	6.01958		300.338	2738	5.73288
1157	124268	43.6139		810.288	22550.3	6.10121		890.288	30936.7	6.13672		414.288	2655.67	5.92165		540.288	4420	6.01954		300.288	2710	5.73278
1156	124409	43.6175		810.238	22469.3	6.10117		890.238	30777	6.13669		414.238	2656	5.92162		540.238	4472	6.01951		300.238	2742	5.73268
1155	124901	43.6211		810.188	22714.7	6.10113		890.188	30789	6.13666		414.188	2658	5.92159		540.188	4470	6.01947		300.188	2748	5.73258
1154	126489	43.6246		810.138	22595	6.10109		890.138	30734	6.13663		414.138	2643	5.92156		540.138	4458	6.01944		300.138	2704.67	5.73249
1153	124962	43.6282		810.088	22561.7	6.10105		890.088	30659	6.1366		414.088	2672.67	5.92154		540.088	4488	6.0194		300.088	2708	5.73239
1152	125384	43.6318		810.038	22468.7	6.101		890.038	30711	6.13657		414.038	2645.33	5.92151		540.038	4516	6.01937		300.038	2747.33	5.73229
1151	125746	43.6353		809.988	22502.7	6.10096		889.988	30826	6.13654		413.988	2669	5.92148		539.988	4352	6.01933		299.988	2703.33	5.73219
1150	125042	43.6389		809.938	22575.7	6.10092		889.938	30794	6.13652		413.938	2698.33	5.92145		539.938	4430	6.01929		299.938	2710.67	5.73209
1149	125122	43.6425		809.888	22643	6.10088		889.888	30839.3	6.13649		413.888	2652.67	5.92142		539.888	4478	6.01926		299.888	2735.33	5.732
1148	123736	43.646		809.838	22594	6.10084		889.838	30860.3	6.13646		413.838	2635	5.92139		539.838	4538	6.01922		299.838	2684	5.7319
1147	124027	43.6496		809.788	22439	6.1008		889.788	30692.3	6.13643		413.788	2648.67	5.92136		539.788	4472	6.01919		299.788	2689.33	5.7318
1146	126369	43.6532		809.738	22554.7	6.10075		889.738	30736.3	6.1364		413.738	2691.67	5.92133		539.738	4416	6.01915		299.738	2701.33	5.7317
1145	126077	43.6567		809.688	22617.7	6.10071		889.688	30824	6.13637		413.688	2668.67	5.9213		539.688	4588	6.01911		299.688	2705.33	5.7316
1144	126942	43.6603		809.638	22549	6.10067		889.638	30737	6.13635		413.638	2652.67	5.92127		539.638	4508	6.01908		299.638	2721.33	5.73151
1143	125354	43.6639		809.588	22519.3	6.10063		889.588	30830	6.13632		413.588	2679.67	5.92124		539.588	4502	6.01904		299.588	2752.67	5.73141
1142	126449	43.6674		809.538	22487.7	6.10059		889.538	30794.7	6.13629		413.538	2647	5.92121		539.538	4358	6.01901		299.538	2751.33	5.73131
1141	128349	43.671		809.488	22516.7	6.10054		889.488	30680.3	6.13626		413.488	2659	5.92118		539.488	4368	6.01897		299.488	2677.33	5.73121
1140	127384	43.6746		809.438	22541.7	6.1005		889.438	30652.3	6.13623		413.438	2664.33	5.92115		539.438	4436	6.01894		299.438	2725.33	5.73111
1139	126178	43.6781		809.388	22408	6.10046		889.388	30727	6.1362		413.388	2663	5.92112		539.388	4474	6.0189		299.388	2718	5.73102
1138	127042	43.6817		809.338	22483.3	6.10042		889.338	30771	6.13618		413.338	2654.33	5.92109		539.338	4420	6.01886		299.338	2660.67	5.73092
1137	126942	43.6853		809.288	22511	6.10038		889.288	30658	6.13615		413.288	2674.33	5.92106		539.288	4444	6.01883		299.288	2736.67	5.73082
1136	126901	43.6888		809.238	22576	6.10033		889.238	30681.3	6.13612		413.238	2660.67	5.92104		539.238	4458	6.01879		299.238	2757.33	5.73072
1135	126027	43.6924		809.188	22493.3	6.10029		889.188	30763.3	6.13609		413.188	2675.33	5.92101		539.188	4298	6.01876		299.188	2758	5.73062
1134	128087	43.696		809.138	22489.7	6.10025		889.138	30771.3	6.13606		413.138	2655.67	5.92098		539.138	4344	6.01872		299.138	2678	5.73053
1133	127645	43.6995		809.088	22558.3	6.10021		889.088	30742.7	6.13603		413.088	2657.67	5.92095		539.088	4392	6.01869		299.088	2697.33	5.73046
1132	128570	43.7031		809.038	22434.7	6.10017		889.038	30698.3	6.13601		413.038	2686	5.92092		539.038	4414	6.01865		299.038	2659.33	5.73041
1131	128057	43.7067		808.988	22385.3	6.10013		888.988	30784.7	6.13598		412.988	2701	5.92089		538.988	4278	6.01861		298.988	2583.33	5.73035
1130	128148	43.7102		808.938	22523	6.10008		888.938	30647.3	6.13595		412.938	2708	5.92086		538.938	4146	6.01858		298.938	2652	5.7303
1129	127746	43.7138		808.888	22539	6.10004		888.888	30721.7	6.13592		412.888	2688.33	5.92083		538.888	4308	6.01854		298.888	2617.33	5.73024
1128	128519	43.7174		808.838	22508	6.1		888.838	30715	6.13589		412.838	2665.33	5.9208		538.838	4366	6.01851		298.838	2714	5.73018
1127	127695	43.7209		808.788	22554.7	6.09996		888.788	30633.3	6.13586		412.788	2667.33	5.92077		538.788	4282	6.01847		298.788	2734	5.73013
1126	127725	43.7204		808.738	22511.7	6.09992		888.738	30609	6.13583		412.738	2673.67	5.92074		538.738	4248	6.01844		298.738	2778	5.73007
1125	127715	43.718		808.688	22536.3	6.09987		888.688	30620.3	6.13581		412.688	2658.67	5.92071		538.688	4232	6.0184		298.688	2736	5.73002
1124	128690	43.7156		808.638	22483	6.09983		888.638	30558	6.13578		412.638	2622.67	5.92068		538.638	4268	6.01836		298.638	2746	5.72996
1123	128730	43.7133		808.588	22414.7	6.09979		888.588	30640.7	6.13575		412.588	2680	5.92065		538.588	4196	6.01833		298.588	2744.67	5.7299
1122	129142	43.7109		808.538	22477	6.09975		888.538	30688	6.13572		412.538	2691	5.92062		538.538	4246	6.01829		298.538	2668	5.72985
1121	129967	43.7085		808.488	22498.7	6.09971		888.488	30732.7	6.13569		412.488	2673	5.92059		538.488	4400	6.01826		298.488	2648.67	5.72979
1120	129303	43.7061		808.438	22490	6.09967		888.438	30744.7	6.13566		412.438	2680	5.92056		538.438	4184	6.01822		298.438	2651.33	5.72974
1119	127605	43.7037		808.388	22506.7	6.09962		888.388	30707.3	6.13564		412.388	2664.67	5.92054		538.388	4128	6.01818		298.388	2711.33	5.72968
1118	130901	43.7014		808.338	22593	6.09958		888.338	30668.7	6.13561		412.338	2698.33	5.92051		538.338	4236	6.01815		298.338	2683.33	5.72963
1117	130369	43.699		808.288	22697.3	6.09954		888.288	30765.7	6.13558		412.288	2663.33	5.92048		538.288	4096	6.01811		298.288	2684.67	5.72957
1116	130429	43.6966		808.238	22724.7	6.0995		888.238	30834	6.13555		412.238	2660.67	5.92045		538.238	4148	6.01808		298.238	2697.33	5.72951
1115	129675	43.6942		808.188	22615.7	6.09946		888.188	30690.3	6.13552		412.188	2678	5.92042		538.188	4348	6.01804		298.188	2651.33	5.72946
1114	130841	43.6918		808.138	22786.7	6.09941		888.138	30631.3	6.13549		412.138	2671.67	5.92039		538.138	4172	6.01801		298.138	2656	5.7294
1113	131544	43.6895		808.088	22657	6.09937		888.088	30584.7	6.13547		412.088	2683.33	5.92036		538.088	4148	6.01797		298.088	2658.67	5.72935
1112	131585	43.6871		808.038	22547.7	6.09933		888.038	30802.3	6.13544		412.038	2692.67	5.92033		538.038	4030	6.01793		298.038	2722.67	5.72929
1111	131876	43.6847		807.988	22626.3	6.09929		887.988	30753.3	6.13541		411.988	2693.33	5.9203		537.988	4004	6.0179		297.988	2694.67	5.72924
1110	130017	43.6823		807.938	22569	6.09925		887.938	30659.3	6.13538		411.938	2657	5.92027		537.938	4102	6.01786		297.938	2662.67	5.72918
1109	131002	43.6799		807.888	22428	6.0992		887.888	30666.7	6.13535		411.888	2691.33	5.92024		537.888	4006	6.01783		297.888	2680	5.72912
1108	131755	43.6775		807.838	22563.7	6.09916		887.838	30662	6.13532		411.838	2644.67	5.92021		537.838	4040	6.01779		297.838	2667.33	5.72907
1107	130117	43.6752		807.788	22568.3	6.09912		887.788	30627.7	6.1353		411.788	2660	5.92018		537.788	3944	6.01776		297.788	2681.33	5.72901
1106	131524	43.6728		807.738	22575.3	6.09908		887.738	30649.7	6.13527		411.738	2645	5.92015		537.738	4100	6.01772		297.738	2640	5.72896
1105	131163	43.6704		807.688	22487.7	6.09904		887.688	30578	6.13524		411.688	2698	5.92012		537.688	4040	6.01768		297.688	2678	5.7289
1104	130168	43.668		807.638	22457.3	6.099		887.638	30594.3	6.13521		411.638	2715	5.92009		537.638	4000	6.01765		297.638	2672.67	5.72884
1103	131243	43.6656		807.588	22707	6.09895		887.588	30643.7	6.13518		411.588	2670.33	5.92006		537.588	3968	6.01761		297.588	2601.33	5.72879
1102	131645	43.6633		807.538	22632.3	6.09891		887.538	30557.3	6.13515		411.538	2689.33	5.92004		537.538	4038	6.01758		297.538	2597.33	5.72873
1101	131082	43.6609		807.488	22537.3	6.09887		887.488	30674	6.13513		411.488	2728.33	5.92001		537.488	4026	6.01754		297.488	2633.33	5.72868
1100	134449	43.6585		807.438	22603.7	6.09883		887.438	30724.3	6.1351		411.438	2649.33	5.91998		537.438	3956	6.0175		297.438	2731.33	5.72862
1099	134007	43.6561		807.388	22597	6.09879		887.388	30697.7	6.13507		411.388	2627	5.91995		537.388	3920	6.01747		297.388	2668.67	5.72857
1098	133273	43.6537		807.338	22638	6.09874		887.338	30603.3	6.13504		411.338	2655.33	5.91992		537.338	3918	6.01743		297.338	2622.67	5.72851
1097	132921	43.6514		807.288	22579.3	6.0987		887.288	30768.7	6.13501		411.288	2660	5.91989		537.288	3878	6.0174		297.288	2658.67	5.72845
1096	133193	43.649		807.238	22619.7	6.09866		887.238	30719.7	6.13498		411.238	2694.33	5.91986		537.238	3870	6.01736		297.238	2681.33	5.7284
1095	131062	43.6466		807.188	22601.7	6.09862		887.188	30683	6.13495		411.188	2730.67	5.91983		537.188	3994	6.01733		297.188	2612	5.72834
1094	131987	43.6442		807.138	22683.3	6.09858		887.138	30550	6.13493		411.138	2716.67	5.9198		537.138	3924	6.01729		297.138	2632.67	5.72829
1093	132409	43.6418		807.088	22584.7	6.09853		887.088	30528.3	6.1349		411.088	2677.67	5.91977		537.088	3810	6.01725		297.088	2594.67	5.72823
1092	130851	43.6394		807.038	22754.3	6.09849		887.038	30562	6.13487		411.038	2649.67	5.91974		537.038	3796	6.01722		297.038	2674	5.72818
1091	131936	43.6371		806.988	22710	6.09845		886.988	30597.3	6.13484		410.988	2657	5.91971		536.988	3924	6.01718		296.988	2655.33	5.72812
1090	132720	43.6347		806.938	22860.3	6.09841		886.938	30857	6.13481		410.938	2715.67	5.91968		536.938	3794	6.01715		296.938	2693.33	5.72806
1089	133092	43.6323		806.888	22750	6.09837		886.888	30749	6.13478		410.888	2666.33	5.91965		536.888	3842	6.01711		296.888	2636	5.72801
1088	134228	43.6299		806.838	22792.7	6.09833		886.838	30666.7	6.13476		410.838	2645.33	5.91962		536.838	3802	6.01708		296.838	2635.33	5.72795
1087	133162	43.6275		806.788	22806	6.09828		886.788	30784.7	6.13473		410.788	2690	5.91959		536.788	3872	6.01704		296.788	2610	5.7279
1086	133474	43.6252		806.738	22599.7	6.09824		886.738	30699.3	6.1347		410.738	2687.33	5.91957		536.738	3866	6.017		296.738	2622	5.72784
1085	134389	43.6228		806.688	22711.3	6.0982		886.688	30717	6.13467		410.688	2644	5.91954		536.688	3854	6.01697		296.688	2612	5.72778
1084	134690	43.6204		806.638	22690	6.09816		886.638	30567	6.13464		410.638	2671	5.91951		536.638	3846	6.01693		296.638	2581.33	5.72773
1083	135605	43.618		806.588	22713.7	6.09812		886.588	30606.7	6.13461		410.588	2694.33	5.91948		536.588	3742	6.0169		296.588	2620.67	5.72767
1082	133394	43.6156		806.538	22716	6.09807		886.538	30679.3	6.13459		410.538	2660	5.91945		536.538	3638	6.01686		296.538	2636.67	5.72762
1081	133394	43.6133		806.488	22696.3	6.09803		886.488	30633.7	6.13456		410.488	2703.33	5.91942		536.488	3746	6.01682		296.488	2643.33	5.72756
1080	134379	43.6109		806.438	22685.7	6.09799		886.438	30693.3	6.13453		410.438	2699.33	5.91939		536.438	3654	6.01679		296.438	2634.67	5.72751
1079	134811	43.6085		806.388	22735.7	6.09795		886.388	30622.7	6.1345		410.388	2689	5.91936		536.388	3736	6.01675		296.388	2603.33	5.72745
1078	135353	43.6061		806.338	22713.3	6.09791		886.338	30665	6.13447		410.338	2689.67	5.91933		536.338	3650	6.01672		296.338	2656	5.72739
1077	133997	43.6037		806.288	22680	6.09786		886.288	30580.3	6.13444		410.288	2706.67	5.9193		536.288	3632	6.01668		296.288	2617.33	5.72734
1076	135152	43.6045		806.238	22680.3	6.09782		886.238	30708.7	6.13442		410.238	2708	5.91927		536.238	3666	6.01665		296.238	2629.33	5.72728
1075	136017	43.6067		806.188	22817	6.09778		886.188	30705	6.13439		410.188	2705.33	5.91924		536.188	3722	6.01661		296.188	2658	5.72723
1074	136328	43.6089		806.138	22784.7	6.09774		886.138	30716	6.13436		410.138	2708.33	5.91921		536.138	3678	6.01657		296.138	2658.67	5.72717
1073	134921	43.6111		806.088	22727	6.0977		886.088	30658.3	6.13433		410.088	2702	5.91918		536.088	3620	6.01654		296.088	2611.33	5.72711
1072	134851	43.6133		806.038	22683.7	6.09766		886.038	30769.3	6.1343		410.038	2708.67	5.91915		536.038	3642	6.0165		296.038	2611.33	5.72706
1071	134881	43.6155		805.988	22778.7	6.09761		885.988	30777.7	6.13427		409.988	2696.67	5.91912		535.988	3562	6.01647		295.988	2643.33	5.727
1070	136167	43.6177		805.938	22726.3	6.09757		885.938	30821.7	6.13425		409.938	2682.33	5.91909		535.938	3664	6.01643		295.938	2608	5.72695
1069	137916	43.6199		805.888	22842.3	6.09753		885.888	30646.7	6.13422		409.888	2678	5.91907		535.888	3672	6.0164		295.888	2606	5.72689
1068	138328	43.6221		805.838	22847.7	6.09749		885.838	30611.7	6.13419		409.838	2654.33	5.91904		535.838	3576	6.01636		295.838	2606.67	5.72684
1067	137846	43.6243		805.788	22870.7	6.09745		885.788	30650.7	6.13416		409.788	2713.33	5.91901		535.788	3634	6.01632		295.788	2598	5.72678
1066	137243	43.6265		805.738	22759.7	6.0974		885.738	30733.3	6.13413		409.738	2696	5.91898		535.738	3630	6.01629		295.738	2662	5.72672
1065	136911	43.6287		805.688	22874.7	6.09736		885.688	30783.7	6.1341		409.688	2647.33	5.91895		535.688	3768	6.01625		295.688	2668.67	5.72667
1064	137213	43.6309		805.638	22840	6.09732		885.638	30901.3	6.13407		409.638	2658.33	5.91892		535.638	3608	6.01622		295.638	2650.67	5.72661
1063	137464	43.6331		805.588	22816	6.09728		885.588	30912.3	6.13405		409.588	2725.33	5.91889		535.588	3614	6.01618		295.588	2584.67	5.72656
1062	136288	43.6353		805.538	22737.3	6.09724		885.538	31018.3	6.13402		409.538	2708.67	5.91886		535.538	3610	6.01614		295.538	2551.33	5.7265
1061	136509	43.6375		805.488	22808.3	6.0972		885.488	30913.3	6.13399		409.488	2663.67	5.91883		535.488	3680	6.01611		295.488	2578.67	5.72645
1060	137394	43.6397		805.438	22823.7	6.09715		885.438	30856	6.13396		409.438	2674.33	5.9188		535.438	3646	6.01607		295.438	2630.67	5.72639
1059	137584	43.6419		805.388	22888.7	6.09711		885.388	30799	6.13393		409.388	2723	5.91877		535.388	3726	6.01604		295.388	2672	5.72633
1058	137253	43.6441		805.338	22825.3	6.09707		885.338	30968	6.1339		409.338	2728.33	5.91874		535.338	3808	6.016		295.338	2636	5.72628
1057	138399	43.6463		805.288	22745	6.09703		885.288	31052.7	6.13388		409.288	2753.67	5.91871		535.288	3844	6.01597		295.288	2614	5.72622
1056	138861	43.6485		805.238	22781.3	6.09699		885.238	30981.3	6.13385		409.238	2745.33	5.91868		535.238	3818	6.01593		295.238	2556.67	5.72617
1055	137735	43.6507		805.188	22996.3	6.09694		885.188	31079.7	6.13382		409.188	2714.33	5.91865		535.188	4004	6.01589		295.188	2582	5.72611
1054	138871	43.6529		805.138	23097.7	6.0969		885.138	31057	6.13379		409.138	2677.33	5.91862		535.138	3982	6.01586		295.138	2624.67	5.72605
1053	138539	43.6551		805.088	22878.3	6.09686		885.088	31055.7	6.13376		409.088	2665	5.91859		535.088	4036	6.01582		295.088	2592.67	5.726
1052	139856	43.6573		805.038	22790.3	6.09682		885.038	31075	6.13373		409.038	2722.67	5.91857		535.038	4062	6.01579		295.038	2617.33	5.72594
1051	141042	43.6595		804.988	22912.3	6.09678		884.988	31165	6.13371		408.988	2714	5.91854		534.988	4100	6.01575		294.988	2581.33	5.72589
1050	138117	43.6617		804.938	23046.3	6.09673		884.938	31298.7	6.13368		408.938	2699.33	5.91851		534.938	4058	6.01572		294.938	2648.67	5.72583
1049	139424	43.6639		804.888	22789	6.09669		884.888	31190	6.13365		408.888	2700	5.91848		534.888	4116	6.01568		294.888	2635.33	5.72578
1048	140318	43.6661		804.838	22891	6.09665		884.838	30957	6.13362		408.838	2696.33	5.91845		534.838	4182	6.01564		294.838	2582.67	5.72572
1047	140338	43.6683		804.788	22802	6.09661		884.788	31076.3	6.13359		408.788	2668.67	5.91842		534.788	4174	6.01561		294.788	2611.33	5.72566
1046	139936	43.6705		804.738	22931	6.09657		884.738	31131	6.13356		408.738	2713.67	5.91839		534.738	4156	6.01557		294.738	2645.33	5.72561
1045	142740	43.6727		804.688	23073	6.09653		884.688	31240.7	6.13354		408.688	2715.67	5.91836		534.688	4326	6.01554		294.688	2604.67	5.72555
1044	141323	43.6749		804.638	22903.3	6.09648		884.638	31398.3	6.13351		408.638	2749.33	5.91833		534.638	4378	6.0155		294.638	2562.67	5.7255
1043	139946	43.6771		804.588	22946.7	6.09644		884.588	31305.7	6.13348		408.588	2723.67	5.9183		534.588	4636	6.01546		294.588	2593.33	5.72544
1042	140610	43.6793		804.538	22992	6.0964		884.538	31373	6.13345		408.538	2744.33	5.91827		534.538	4764	6.01543		294.538	2565.33	5.72539
1041	138931	43.6815		804.488	22878.7	6.09636		884.488	31287.3	6.13342		408.488	2697.33	5.91824		534.488	4960	6.01539		294.488	2611.33	5.72533
1040	140167	43.6837		804.438	22847.3	6.09632		884.438	31408	6.13339		408.438	2716	5.91821		534.438	4968	6.01536		294.438	2556	5.72527
1039	141594	43.6859		804.388	22900.7	6.09627		884.388	31313	6.13336		408.388	2752.67	5.91818		534.388	4936	6.01532		294.388	2591.33	5.72522
1038	141976	43.6881		804.338	23015.3	6.09623		884.338	31501.3	6.13334		408.338	2728.33	5.91815		534.338	4992	6.01529		294.338	2564	5.72516
1037	141454	43.6903		804.288	22886.3	6.09619		884.288	31608.7	6.13331		408.288	2734.33	5.91812		534.288	5170	6.01525		294.288	2623.33	5.72511
1036	140790	43.6925		804.238	23026	6.09615		884.238	31496	6.13328		408.238	2714	5.9181		534.238	5260	6.01521		294.238	2610	5.72505
1035	140640	43.6947		804.188	22922.7	6.09611		884.188	31758.3	6.13325		408.188	2679.33	5.91807		534.188	5522	6.01518		294.188	2608.67	5.72499
1034	142187	43.6969		804.138	23112	6.09606		884.138	31833	6.13322		408.138	2737.67	5.91804		534.138	5526	6.01514		294.138	2570	5.72494
1033	142991	43.6991		804.088	22987.3	6.09602		884.088	31836.7	6.13319		408.088	2745	5.91801		534.088	5474	6.01511		294.088	2572	5.72488
1032	143614	43.7013		804.038	22984	6.09598		884.038	31783.7	6.13317		408.038	2763	5.91798		534.038	5522	6.01507		294.038	2613.33	5.72483
1031	142971	43.7035		803.988	22897	6.09594		883.988	31737.3	6.13314		407.988	2760.33	5.91795		533.988	5742	6.01504		293.988	2636	5.72477
1030	143484	43.7057		803.938	23007.3	6.0959		883.938	31788.3	6.13311		407.938	2789.67	5.91792		533.938	5994	6.015		293.938	2617.33	5.72472
1029	142740	43.7079		803.888	22978.7	6.09586		883.888	31945.3	6.13308		407.888	2764.33	5.91789		533.888	6038	6.01496		293.888	2590.67	5.72466
1028	143393	43.7101		803.838	22878.3	6.09581		883.838	31876.7	6.13305		407.838	2788.33	5.91786		533.838	6072	6.01493		293.838	2601.33	5.7246
1027	143413	43.7123		803.788	22991.7	6.09577		883.788	31968.7	6.13302		407.788	2776.67	5.91783		533.788	6218	6.01489		293.788	2564.67	5.72455
1026	143544	43.7161		803.738	23018	6.09573		883.738	31923.7	6.133		407.738	2774.67	5.9178		533.738	6410	6.01486		293.738	2562	5.72449
1025	141946	43.7207		803.688	22963.7	6.09569		883.688	31952	6.13297		407.688	2798	5.91777		533.688	6618	6.01482		293.688	2642.67	5.72444
1024	142529	43.7252		803.638	23104	6.09565		883.638	31989	6.13294		407.638	2800.33	5.91774		533.638	6776	6.01479		293.638	2580.67	5.72438
1023	143273	43.7297		803.588	23133.7	6.0956		883.588	32219.3	6.13291		407.588	2806	5.91771		533.588	6712	6.01475		293.588	2580	5.72433
1022	144810	43.7343		803.538	22916.3	6.09556		883.538	32222	6.13288		407.538	2840.67	5.91768		533.538	6912	6.01471		293.538	2628.67	5.72427
1021	144831	43.7388		803.488	23159.3	6.09552		883.488	32268.7	6.13285		407.488	2791.33	5.91765		533.488	7276	6.01468		293.488	2572.67	5.72421
1020	146981	43.7434		803.438	23121.7	6.09548		883.438	32330.3	6.13283		407.438	2817	5.91762		533.438	7364	6.01464		293.438	2550.67	5.72416
1019	148157	43.7479		803.388	23066.7	6.09544		883.388	32344.7	6.1328		407.388	2817	5.9176		533.388	7522	6.01461		293.388	2646.67	5.7241
1018	148147	43.7525		803.338	23027.3	6.0954		883.338	32434	6.13277		407.338	2861.33	5.91757		533.338	7580	6.01457		293.338	2669.33	5.72405
1017	148911	43.757		803.288	23122.3	6.09535		883.288	32473.7	6.13274		407.288	2851.67	5.91754		533.288	7560	6.01453		293.288	2627.33	5.72399
1016	150067	43.7616		803.238	23100.7	6.09531		883.238	32451.7	6.13271		407.238	2861	5.91751		533.238	7962	6.0145		293.238	2621.33	5.72393
1015	151353	43.7661		803.188	23058.7	6.09527		883.188	32469.7	6.13268		407.188	2904.67	5.91748		533.188	8036	6.01446		293.188	2574.67	5.72388
1014	150710	43.7707		803.138	23079.3	6.09523		883.138	32525.3	6.13266		407.138	2921.33	5.91745		533.138	8334	6.01443		293.138	2590	5.72382
1013	151504	43.7752		803.088	23204	6.09519		883.088	32764	6.13263		407.088	2921.33	5.91742		533.088	8512	6.01439		293.088	2627.33	5.72377
1012	153624	43.7797		803.038	23182.3	6.09514		883.038	32619	6.1326		407.038	2881.33	5.91739		533.038	8632	6.01436		293.038	2602.67	5.72371
1011	152257	43.7843		802.988	23134	6.0951		882.988	32768	6.13257		406.988	2889.33	5.91736		532.988	8674	6.01432		292.988	2661.33	5.72366
1010	151735	43.7888		802.938	23087	6.09506		882.938	32743	6.13254		406.938	2943.67	5.91733		532.938	9192	6.01428		292.938	2634.67	5.7236
1009	150871	43.7934		802.888	23073.3	6.09502		882.888	32892	6.13251		406.888	2987.33	5.9173		532.888	9276	6.01425		292.888	2634.67	5.72354
1008	148237	43.7979		802.838	23085	6.09498		882.838	32892.3	6.13248		406.838	2971.67	5.91727		532.838	9840	6.01421		292.838	2614.67	5.72349
1007	149484	43.8025		802.788	23118.7	6.09493		882.788	32945	6.13246		406.788	3018.33	5.91724		532.788	10252	6.01418		292.788	2626	5.72343
1006	148187	43.807		802.738	23132.7	6.09489		882.738	32952	6.13243		406.738	2978	5.91721		532.738	10350	6.01414		292.738	2621.33	5.72338
1005	147504	43.8116		802.688	23172	6.09485		882.688	32991.3	6.1324		406.688	3022	5.91718		532.688	10766	6.01411		292.688	2592	5.72332
1004	143554	43.8161		802.638	23214.7	6.09481		882.638	32935.7	6.13237		406.638	3016.67	5.91715		532.638	11234	6.01407		292.638	2600.67	5.72327
1003	142800	43.8206		802.588	23179.7	6.09477		882.588	33017.7	6.13234		406.588	3052.67	5.91712		532.588	11490	6.01403		292.588	2580	5.72321
1002	146931	43.8252		802.538	23100.3	6.09473		882.538	33136.3	6.13231		406.538	3074.33	5.9171		532.538	12152	6.014		292.538	2643.33	5.72315
1001	146077	43.8297		802.488	23131	6.09468		882.488	33245	6.13229		406.488	3051.33	5.91707		532.488	12718	6.01396		292.488	2636.67	5.7231
1000	145675	43.8343		802.438	23186.7	6.09464		882.438	33325.7	6.13226		406.438	3064.33	5.91704		532.438	12952	6.01393		292.438	2620	5.72304
999	147675	43.8388		802.388	23255	6.0946		882.388	33387	6.13223		406.388	3137.33	5.91701		532.388	13526	6.01389		292.388	2624.67	5.72299
998	146891	43.8434		802.338	23126	6.09456		882.338	33277.7	6.1322		406.338	3121.33	5.91698		532.338	14148	6.01385		292.338	2603.33	5.72293
997	146780	43.8479		802.288	23163.7	6.09452		882.288	33259.7	6.13217		406.288	3089.33	5.91695		532.288	14632	6.01382		292.288	2601.33	5.72287
996	145685	43.8525		802.238	23139.3	6.09447		882.238	33414	6.13214		406.238	3145.33	5.91692		532.238	15470	6.01378		292.238	2608.67	5.72282
995	146921	43.857		802.188	23158.7	6.09443		882.188	33486	6.13212		406.188	3095.67	5.91689		532.188	16248	6.01375		292.188	2664	5.72276
994	145182	43.8616		802.138	23319.3	6.09439		882.138	33493	6.13209		406.138	3107.33	5.91686		532.138	17116	6.01371		292.138	2628	5.72271
993	145253	43.8661		802.088	23200	6.09435		882.088	33569.7	6.13206		406.088	3105	5.91683		532.088	17728	6.01368		292.088	2635.33	5.72265
992	144991	43.8706		802.038	23292.3	6.09431		882.038	33648	6.13203		406.038	3120.33	5.9168		532.038	18562	6.01364		292.038	2624	5.7226
991	142408	43.8752		801.988	23179	6.09426		881.988	33584.7	6.132		405.988	3157	5.91677		531.988	19268	6.0136		291.988	2636.67	5.72254
990	142539	43.8797		801.938	23148	6.09422		881.938	33656.7	6.13197		405.938	3133.33	5.91674		531.938	20468	6.01357		291.938	2628.67	5.72248
989	142127	43.8843		801.888	23072.3	6.09418		881.888	33900.7	6.13195		405.888	3038.33	5.91671		531.888	21582	6.01353		291.888	2628	5.72243
988	142559	43.8888		801.838	23088.3	6.09414		881.838	33957	6.13192		405.838	3066	5.91668		531.838	22394	6.0135		291.838	2654.67	5.72237
987	140811	43.8934		801.788	23038.7	6.0941		881.788	33934	6.13189		405.788	3066.33	5.91665		531.788	23658	6.01346		291.788	2677.33	5.72232
986	141253	43.8979		801.738	23029	6.09406		881.738	34033.3	6.13186		405.738	3077.33	5.91662		531.738	24322	6.01343		291.738	2705.33	5.72226
985	141414	43.9025		801.688	23106.7	6.09401		881.688	34074.3	6.13183		405.688	3101	5.9166		531.688	25812	6.01339		291.688	2708.67	5.72221
984	142177	43.907		801.638	23064.3	6.09397		881.638	34115.7	6.1318		405.638	3065.67	5.91657		531.638	27048	6.01335		291.638	2686.67	5.72215
983	144228	43.9115		801.588	23102.7	6.09393		881.588	34143	6.13177		405.588	3031.67	5.91654		531.588	27882	6.01332		291.588	2724.67	5.72209
982	145896	43.9161		801.538	23053.7	6.09389		881.538	34122.3	6.13175		405.538	3006.67	5.91651		531.538	29092	6.01328		291.538	2712.67	5.72204
981	146016	43.9206		801.488	22969.7	6.09385		881.488	34387.3	6.13172		405.488	3023.67	5.91648		531.488	30278	6.01325		291.488	2624.67	5.72198
980	147001	43.9252		801.438	23117	6.0938		881.438	34424	6.13169		405.438	2971	5.91645		531.438	31376	6.01321		291.438	2660.67	5.72193
979	151031	43.9297		801.388	23104.7	6.09376		881.388	34426	6.13166		405.388	2935.67	5.91642		531.388	32922	6.01317		291.388	2683.33	5.72187
978	154438	43.9343		801.338	22904.3	6.09372		881.338	34390	6.13163		405.338	2963.33	5.91639		531.338	34386	6.01314		291.338	2720	5.72181
977	156760	43.9388		801.288	22953	6.09368		881.288	34498.3	6.1316		405.288	2957.33	5.91636		531.288	35494	6.0131		291.288	2717.33	5.72176
976	156308	43.9438		801.238	23002.3	6.09364		881.238	34631	6.13158		405.238	2900.33	5.91633		531.238	36880	6.01307		291.238	2702	5.7217
975	155946	43.9489		801.188	22956.7	6.0936		881.188	34596.7	6.13155		405.188	2884	5.9163		531.188	38242	6.01303		291.188	2670	5.72165
974	154448	43.954		801.138	22993	6.09355		881.138	34741	6.13152		405.138	2845.33	5.91627		531.138	39046	6.013		291.138	2659.33	5.72159
973	151122	43.9591		801.088	22987.3	6.09351		881.088	34773	6.13149		405.088	2843	5.91624		531.088	40134	6.01296		291.088	2620.67	5.72154
972	147946	43.9643		801.038	23092.3	6.09347		881.038	34849	6.13146		405.038	2848.67	5.91621		531.038	41160	6.01292		291.038	2676.67	5.72148
971	143725	43.9694		800.988	23093.3	6.09343		880.988	34895.7	6.13143		404.988	2854	5.91618		530.988	42338	6.01289		290.988	2772	5.72142
970	142951	43.9745		800.938	23051.3	6.09339		880.938	34865.3	6.13141		404.938	2865	5.91615		530.938	43164	6.01285		290.938	2714	5.72137
969	141444	43.9796		800.888	22933	6.09334		880.888	34770.7	6.13138		404.888	2813.33	5.91613		530.888	43848	6.01282		290.888	2708.67	5.72131
968	139856	43.9847		800.838	22965.7	6.0933		880.838	35028.7	6.13135		404.838	2821	5.9161		530.838	44278	6.01278		290.838	2760.67	5.72126
967	137645	43.9899		800.788	22989.7	6.09326		880.788	34940.7	6.13132		404.788	2808.67	5.91607		530.788	44856	6.01275		290.788	2776	5.7212
966	135062	43.995		800.738	22919.3	6.09322		880.738	35056.7	6.13129		404.738	2792.33	5.91604		530.738	45240	6.01271		290.738	2704	5.72114
965	135062	44.0001		800.688	22981	6.09318		880.688	35089.3	6.13126		404.688	2765.67	5.91601		530.688	45490	6.01267		290.688	2708	5.72109
964	133695	44.0052		800.638	22980.3	6.09313		880.638	35148.3	6.13124		404.638	2810.33	5.91598		530.638	45280	6.01264		290.638	2741.33	5.72103
963	132781	44.0104		800.588	22986.3	6.09309		880.588	35208.3	6.13121		404.588	2794.33	5.91595		530.588	45380	6.0126		290.588	2754	5.72098
962	133193	44.0155		800.538	22931	6.09305		880.538	35398	6.13118		404.538	2825	5.91592		530.538	44654	6.01257		290.538	2755.33	5.72092
961	132740	44.0206		800.488	22905.7	6.09301		880.488	35273.7	6.13115		404.488	2858.67	5.91589		530.488	43928	6.01253		290.488	2774	5.72087
960	133102	44.0257		800.438	22971	6.09297		880.438	35361	6.13112		404.438	2860	5.91586		530.438	43272	6.01249		290.438	2770	5.72081
959	132228	44.0309		800.388	22943.7	6.09293		880.388	35355	6.13109		404.388	2812.67	5.91583		530.388	41976	6.01246		290.388	2806	5.72075
958	131223	44.036		800.338	22887.3	6.09288		880.338	35602.7	6.13107		404.338	2855.67	5.9158		530.338	40748	6.01242		290.338	2837.33	5.7207
957	132047	44.0411		800.288	22963.3	6.09284		880.288	35529	6.13104		404.288	2874.33	5.91577		530.288	39304	6.01239		290.288	2864	5.72064
956	131846	44.0462		800.238	22936.7	6.0928		880.238	35468.7	6.13101		404.238	2881.33	5.91574		530.238	38198	6.01235		290.238	2859.33	5.72059
955	131173	44.0514		800.188	22984.3	6.09276		880.188	35596	6.13098		404.188	2896	5.91571		530.188	36686	6.01232		290.188	2813.33	5.72053
954	131142	44.0565		800.138	22994	6.09272		880.138	35498	6.13095		404.138	2864	5.91568		530.138	34802	6.01228		290.138	2836.67	5.72048
953	132379	44.0616		800.088	22908.3	6.09267		880.088	35744	6.13092		404.088	2809.33	5.91565		530.088	33054	6.01224		290.088	2900	5.72042
952	132017	44.0667		800.038	23079	6.09263		880.038	35745.3	6.13089		404.038	2834	5.91563		530.038	31222	6.01221		290.038	2882.67	5.72036
951	131434	44.0718		799.988	23059.3	6.09259		879.988	35670.3	6.13087		403.988	2876	5.9156		529.988	29608	6.01217		289.988	2870.67	5.72031
950	132791	44.077		799.938	22951	6.09255		879.938	35863.7	6.13084		403.938	2875	5.91557		529.938	27458	6.01214		289.938	2956	5.72025
949	133162	44.0821		799.888	23027	6.09251		879.888	35819.3	6.13081		403.888	2919	5.91554		529.888	25478	6.0121		289.888	2947.33	5.7202
948	132248	44.0872		799.838	22904	6.09246		879.838	35964.3	6.13078		403.838	2869	5.91551		529.838	23976	6.01207		289.838	2954.67	5.72014
947	133394	44.0923		799.788	23065.7	6.09242		879.788	35880	6.13075		403.788	2904	5.91548		529.788	22378	6.01203		289.788	2974.67	5.72008
946	132017	44.0975		799.738	23089	6.09238		879.738	35887	6.13072		403.738	2899	5.91545		529.738	20790	6.01199		289.738	2950.67	5.72003
945	131755	44.1026		799.688	23049	6.09234		879.688	35992.7	6.1307		403.688	2942.33	5.91542		529.688	19072	6.01196		289.688	3050.67	5.71997
944	133394	44.1077		799.638	23062.7	6.0923		879.638	35967	6.13067		403.638	2920.67	5.91539		529.638	17676	6.01192		289.638	3146.67	5.71992
943	131816	44.1128		799.588	23024.7	6.09226		879.588	36070.7	6.13064		403.588	2972.67	5.91536		529.588	16192	6.01189		289.588	3180.67	5.71986
942	133414	44.118		799.538	23063	6.09221		879.538	36223	6.13061		403.538	2993.33	5.91533		529.538	14616	6.01185		289.538	3109.33	5.71981
941	134228	44.1231		799.488	22984.3	6.09217		879.488	36259.7	6.13058		403.488	2992.33	5.9153		529.488	13442	6.01182		289.488	3142.67	5.71975
940	134549	44.1282		799.438	23026.3	6.09213		879.438	36133.3	6.13055		403.438	2967	5.91527		529.438	12196	6.01178		289.438	3210.67	5.71969
939	134419	44.1333		799.388	23042.3	6.09209		879.388	36304.7	6.13053		403.388	2951	5.91524		529.388	11104	6.01174		289.388	3241.33	5.71964
938	134610	44.1385		799.338	23088.7	6.09205		879.338	36287.3	6.1305		403.338	2940.67	5.91521		529.338	10214	6.01171		289.338	3277.33	5.71958
937	135223	44.1436		799.288	23150.7	6.092		879.288	36264	6.13047		403.288	2985	5.91518		529.288	9562	6.01167		289.288	3287.33	5.71953
936	135323	44.1487		799.238	23096	6.09196		879.238	36397.3	6.13044		403.238	2960	5.91515		529.238	8368	6.01164		289.238	3336	5.71947
935	137132	44.1538		799.188	23153	6.09192		879.188	36353.7	6.13041		403.188	3015.33	5.91513		529.188	7742	6.0116		289.188	3410.67	5.71942
934	135183	44.159		799.138	23236	6.09188		879.138	36441.7	6.13038		403.138	3016	5.9151		529.138	7190	6.01156		289.138	3475.33	5.71936
933	133896	44.1641		799.088	23156.7	6.09184		879.088	36529.3	6.13037		403.088	2974	5.91507		529.088	6750	6.01153		289.088	3476.67	5.7193
932	135213	44.1692		799.038	23212.7	6.09179		879.038	36296.3	6.13035		403.038	3010.33	5.91504		529.038	6110	6.01149		289.038	3518	5.71925
931	137122	44.1743		798.988	23105.3	6.09175		878.988	36220.3	6.13034		402.988	3009.67	5.91501		528.988	5740	6.01146		288.988	3639.33	5.71919
930	136891	44.1794		798.938	23175	6.09171		878.938	36099	6.13033		402.938	3068.67	5.91498		528.938	5470	6.01142		288.938	3634.67	5.71914
929	138298	44.1846		798.888	23269.7	6.09167		878.888	36295.7	6.13031		402.888	3004.33	5.91495		528.888	5154	6.01139		288.888	3698	5.71908
928	139263	44.1897		798.838	23269.7	6.09163		878.838	36213	6.1303		402.838	3109.67	5.91492		528.838	4762	6.01135		288.838	3730.67	5.71902
927	137997	44.1948		798.788	23216.3	6.09159		878.788	36239.3	6.13029		402.788	3019.33	5.91489		528.788	4546	6.01131		288.788	3783.33	5.71897
926	138499	44.2018		798.738	23224.3	6.09154		878.738	36150.7	6.13027		402.738	2998	5.91486		528.738	4344	6.01128		288.738	3788.67	5.71891
925	139343	44.2097		798.688	23301	6.0915		878.688	35921	6.13026		402.688	2988.67	5.91483		528.688	3988	6.01124		288.688	3824	5.71886
924	137303	44.2176		798.638	23288.3	6.09146		878.638	35963.3	6.13025		402.638	3009	5.9148		528.638	3912	6.01121		288.638	3900.67	5.7188
923	136891	44.2255		798.588	23429.7	6.09142		878.588	36117	6.13023		402.588	3007.33	5.91477		528.588	3742	6.01117		288.588	4017.33	5.71875
922	136901	44.2334		798.538	23441.7	6.09138		878.538	36103.3	6.13022		402.538	2988.67	5.91474		528.538	3640	6.01114		288.538	4094	5.71869
921	137635	44.2412		798.488	23489.3	6.09133		878.488	36181.7	6.13021		402.488	3025	5.91471		528.488	3484	6.0111		288.488	4036	5.71863
920	137383	44.2491		798.438	23520.7	6.09129		878.438	35894.7	6.13019		402.438	3040.33	5.91468		528.438	3376	6.01106		288.438	4066.67	5.71858
919	136780	44.257		798.388	23609.3	6.09125		878.388	35621.3	6.13018		402.388	3028.67	5.91465		528.388	3282	6.01103		288.388	4110	5.71852
918	137152	44.2649		798.338	23567.7	6.09121		878.338	35830	6.13017		402.338	2985	5.91463		528.338	3366	6.01099		288.338	4081.33	5.71847
917	136640	44.2728		798.288	23512.3	6.09117		878.288	35709.3	6.13015		402.288	2966	5.9146		528.288	3230	6.01096		288.288	4166.67	5.71841
916	137162	44.2806		798.238	23594	6.09113		878.238	35858.7	6.13014		402.238	2924.33	5.91457		528.238	3144	6.01092		288.238	4200.67	5.71836
915	137896	44.2885		798.188	23816.3	6.09108		878.188	35690.3	6.13013		402.188	2924.33	5.91454		528.188	3106	6.01088		288.188	4304	5.7183
914	138459	44.2964		798.138	23880.7	6.09104		878.138	35487.7	6.13011		402.138	2939.67	5.91451		528.138	3012	6.01085		288.138	4389.33	5.71824
913	136901	44.3043		798.088	23720.7	6.091		878.088	35356	6.1301		402.088	2906.67	5.91448		528.088	2986	6.01081		288.088	4411.33	5.71819
912	136228	44.3121		798.038	23740.7	6.09096		878.038	35427	6.13009		402.038	2873.33	5.91445		528.038	3008	6.01078		288.038	4352	5.71813
911	138740	44.32		797.988	23739.3	6.09092		877.988	35333.3	6.13007		401.988	2909.67	5.91442		527.988	2934	6.01074		287.988	4318.67	5.71808
910	137564	44.3279		797.938	23849.7	6.09087		877.938	35278.7	6.13006		401.938	2881	5.91439		527.938	2904	6.01071		287.938	4256.67	5.71802
909	138037	44.3358		797.888	23928.7	6.09083		877.888	35510.7	6.13005		401.888	2860.33	5.91436		527.888	2808	6.01067		287.888	4370	5.71796
908	138489	44.3437		797.838	23985.7	6.09079		877.838	35223.7	6.13003		401.838	2864.67	5.91433		527.838	2820	6.01063		287.838	4404	5.71791
907	139916	44.3515		797.788	24173.3	6.09075		877.788	35031.7	6.13002		401.788	2829.33	5.9143		527.788	2762	6.0106		287.788	4306	5.71785
906	139896	44.3594		797.738	24151	6.09071		877.738	34914	6.13001		401.738	2824	5.91427		527.738	2746	6.01056		287.738	4347.33	5.7178
905	139906	44.3673		797.688	24222.7	6.09066		877.688	34888.3	6.12999		401.688	2827.33	5.91424		527.688	2610	6.01053		287.688	4395.33	5.71774
904	139695	44.3752		797.638	24169.7	6.09062		877.638	34791.3	6.12998		401.638	2794	5.91421		527.638	2734	6.01049		287.638	4400	5.71769
903	138439	44.3831		797.588	24239	6.09058		877.588	34798.7	6.12997		401.588	2789.67	5.91418		527.588	2696	6.01046		287.588	4458	5.71763
902	138620	44.3909		797.538	24301.3	6.09054		877.538	34780.7	6.12995		401.538	2807.33	5.91416		527.538	2728	6.01042		287.538	4433.33	5.71757
901	140097	44.3988		797.488	24496	6.0905		877.488	34649.3	6.12994		401.488	2790.33	5.91413		527.488	2596	6.01038		287.488	4316.67	5.71752
900	142398	44.4067		797.438	24344.7	6.09046		877.438	34572	6.12993		401.438	2769.67	5.9141		527.438	2574	6.01035		287.438	4281.33	5.71746
899	141966	44.4146		797.388	24488.3	6.09041		877.388	34693	6.12991		401.388	2747.33	5.91407		527.388	2706	6.01031		287.388	4208.67	5.71741
898	141112	44.4225		797.338	24396.3	6.09037		877.338	34519.3	6.1299		401.338	2766	5.91404		527.338	2604	6.01028		287.338	4284	5.71735
897	140690	44.4303		797.288	24597	6.09033		877.288	34322.3	6.12989		401.288	2743.67	5.91401		527.288	2586	6.01024		287.288	4233.33	5.7173
896	140308	44.4382		797.238	24534.3	6.09029		877.238	34271	6.12987		401.238	2687.33	5.91398		527.238	2492	6.0102		287.238	4110.67	5.71724
895	139574	44.4461		797.188	24527	6.09025		877.188	34227.7	6.12986		401.188	2702	5.91395		527.188	2556	6.01017		287.188	4132.67	5.71718
894	141755	44.454		797.138	24823.7	6.0902		877.138	34170	6.12985		401.138	2715	5.91392		527.138	2466	6.01013		287.138	4039.33	5.71713
893	141052	44.4618		797.088	24725.7	6.09016		877.088	34151.3	6.12983		401.088	2736	5.91389		527.088	2476	6.0101		287.088	3876.67	5.71707
892	140419	44.4697		797.038	24825.3	6.09012		877.038	34046	6.12982		401.038	2732	5.91386		527.038	2624	6.01006		287.038	3845.33	5.71702
891	140177	44.4776		796.988	24773	6.09008		876.988	33887.3	6.1298		400.988	2684.67	5.91383		526.988	2518	6.01003		286.988	3795.33	5.71696
890	138027	44.4855		796.938	24864.7	6.09004		876.938	33989.7	6.12979		400.938	2678	5.9138		526.938	2410	6.00999		286.938	3748	5.7169
889	140599	44.4934		796.888	25057.7	6.08999		876.888	33816.7	6.12978		400.888	2709.33	5.91377		526.888	2502	6.00995		286.888	3655.33	5.71685
888	141795	44.5012		796.838	24960	6.08995		876.838	33759.3	6.12976		400.838	2703.33	5.91374		526.838	2474	6.00992		286.838	3564	5.71679
887	140017	44.5091		796.788	25043	6.08991		876.788	33923.3	6.12975		400.788	2659.67	5.91371		526.788	2482	6.00988		286.788	3622	5.71674
886	139182	44.517		796.738	25101.3	6.08987		876.738	33811	6.12974		400.738	2656.67	5.91368		526.738	2394	6.00985		286.738	3600	5.71668
885	140047	44.5249		796.688	25088.3	6.08983		876.688	33753.7	6.12972		400.688	2693	5.91366		526.688	2418	6.00981		286.688	3548	5.71663
884	142881	44.5328		796.638	25173.3	6.08979		876.638	33764.7	6.12971		400.638	2674.33	5.91363		526.638	2420	6.00978		286.638	3576	5.71657
883	145856	44.5406		796.588	25162.7	6.08974		876.588	33772	6.1297		400.588	2715	5.9136		526.588	2380	6.00974		286.588	3507.33	5.71651
882	147695	44.5485		796.538	25265	6.0897		876.538	33707.3	6.12968		400.538	2736.33	5.91357		526.538	2300	6.0097		286.538	3512	5.71646
881	150358	44.5564		796.488	25268.7	6.08966		876.488	33827	6.12967		400.488	2724.33	5.91354		526.488	2392	6.00967		286.488	3592	5.7164
880	153624	44.5643		796.438	25291	6.08962		876.438	33654.3	6.12966		400.438	2703.33	5.91351		526.438	2428	6.00963		286.438	3604.67	5.71635
879	159805	44.5722		796.388	25310.3	6.08958		876.388	33600	6.12964		400.388	2677	5.91348		526.388	2302	6.0096		286.388	3644.67	5.71629
878	161624	44.58		796.338	25327.3	6.08953		876.338	33727.7	6.12963		400.338	2713	5.91345		526.338	2370	6.00956		286.338	3676	5.71624
877	159534	44.5879		796.288	25356.7	6.08949		876.288	33738.7	6.12962		400.288	2696.67	5.91342		526.288	2488	6.00952		286.288	3690.67	5.71618
876	155413	44.5961		796.238	25328.3	6.08945		876.238	33596	6.1296		400.238	2703	5.91339		526.238	2380	6.00949		286.238	3716.67	5.71612
875	152790	44.6045		796.188	25293.3	6.08941		876.188	33841.3	6.12959		400.188	2681	5.91336		526.188	2346	6.00945		286.188	3780	5.71607
874	154267	44.6129		796.138	25294	6.08937		876.138	33662.7	6.12958		400.138	2708.67	5.91333		526.138	2400	6.00942		286.138	3865.33	5.71601
873	159051	44.6213		796.088	25337	6.08933		876.088	33704.3	6.12956		400.088	2674.33	5.9133		526.088	2314	6.00938		286.088	3950.67	5.71596
872	165634	44.6297		796.038	25509.3	6.08928		876.038	33689.3	6.12955		400.038	2722.67	5.91327		526.038	2388	6.00935		286.038	4046	5.7159
871	160720	44.6381		795.988	25446.3	6.08924		875.988	33739.3	6.12954		399.988	2734	5.91324		525.988	2262	6.00931		285.988	4089.33	5.71584
870	148077	44.6465		795.938	25352.3	6.0892		875.938	33821	6.12952		399.938	2720.33	5.91321		525.938	2248	6.00927		285.938	4139.33	5.71579
869	136579	44.6549		795.888	25518.7	6.08916		875.888	33814.7	6.12951		399.888	2741	5.91318		525.888	2372	6.00924		285.888	4178	5.71573
868	130992	44.6633		795.838	25340.3	6.08912		875.838	33688.3	6.1295		399.838	2715.67	5.91316		525.838	2286	6.0092		285.838	4306.67	5.71568
867	132781	44.6717		795.788	25224.7	6.08907		875.788	33743.3	6.12948		399.788	2682	5.91313		525.788	2312	6.00917		285.788	4402	5.71562
866	135343	44.6801		795.738	25260.7	6.08903		875.738	33725.7	6.12947		399.738	2718.67	5.9131		525.738	2336	6.00913		285.738	4422.67	5.71557
865	138037	44.6885		795.688	25290	6.08899		875.688	33887.7	6.12946		399.688	2729.33	5.91307		525.688	2292	6.0091		285.688	4483.33	5.71551
864	141132	44.6969		795.638	25216.7	6.08895		875.638	33926	6.12944		399.638	2711.33	5.91304		525.638	2322	6.00906		285.638	4710.67	5.71545
863	146037	44.7053		795.588	25133.3	6.08891		875.588	33862	6.12943		399.588	2753.33	5.91301		525.588	2304	6.00902		285.588	4803.33	5.7154
862	152871	44.7137		795.538	25251.7	6.08886		875.538	34088.7	6.12942		399.538	2721	5.91298		525.538	2282	6.00899		285.538	4937.33	5.71534
861	157634	44.7221		795.488	25060	6.08882		875.488	34030.3	6.1294		399.488	2745.67	5.91295		525.488	2226	6.00895		285.488	5020	5.71529
860	161212	44.7305		795.438	24944	6.08878		875.438	33936.7	6.12939		399.438	2739.67	5.91292		525.438	2248	6.00892		285.438	5122	5.71523
859	158689	44.7389		795.388	24895	6.08874		875.388	34123	6.12938		399.388	2771.67	5.91289		525.388	2276	6.00888		285.388	5190.67	5.71517
858	155825	44.7473		795.338	24767	6.0887		875.338	34204	6.12936		399.338	2738.33	5.91286		525.338	2312	6.00885		285.338	5415.33	5.71512
857	157875	44.7557		795.288	24924.7	6.08866		875.288	34245	6.12935		399.288	2741.67	5.91283		525.288	2244	6.00881		285.288	5475.33	5.71506
856	165282	44.7641		795.238	24899.3	6.08861		875.238	34245.7	6.12934		399.238	2730.33	5.9128		525.238	2326	6.00877		285.238	5538.67	5.71501
855	180096	44.7725		795.188	24550.3	6.08857		875.188	34374.7	6.12932		399.188	2738.33	5.91277		525.188	2416	6.00874		285.188	5753.33	5.71495
854	190066	44.7809		795.138	24623.7	6.08853		875.138	34518.3	6.12931		399.138	2748	5.91274		525.138	2276	6.0087		285.138	5812	5.7149
853	169423	44.7893		795.088	24341	6.08849		875.088	34589.3	6.1293		399.088	2736.33	5.91271		525.088	2210	6.00867		285.088	5906	5.71484
852	136077	44.7977		795.038	24281.7	6.08845		875.038	34569	6.12928		399.038	2712.33	5.91268		525.038	2382	6.00863		285.038	6035.33	5.71478
851	119505	44.8061		794.988	24208.3	6.0884		874.988	34636	6.12927		398.988	2740.33	5.91266		524.988	2322	6.00859		284.988	6079.33	5.71473
850	113997	44.8145		794.938	24126.7	6.08836		874.938	34812	6.12926		398.938	2755.33	5.91263		524.938	2348	6.00856		284.938	6234	5.71467
849	111183	44.8229		794.888	24070	6.08832		874.888	34802.7	6.12924		398.888	2731.67	5.9126		524.888	2256	6.00852		284.888	6338.67	5.71462
848	110620	44.8313		794.838	23747	6.08828		874.838	34835	6.12923		398.838	2724.33	5.91257		524.838	2204	6.00849		284.838	6406.67	5.71456
847	109776	44.8397		794.788	23818	6.08824		874.788	34968.7	6.12922		398.788	2747	5.91254		524.788	2300	6.00845		284.788	6373.33	5.71451
846	109163	44.8481		794.738	23571.3	6.08819		874.738	35239	6.1292		398.738	2747	5.91251		524.738	2226	6.00842		284.738	6392	5.71445
845	107806	44.8565		794.688	23557.7	6.08815		874.688	35260.7	6.12919		398.688	2772.67	5.91248		524.688	2256	6.00838		284.688	6505.33	5.71439
844	108620	44.8649		794.638	23340.7	6.08811		874.638	35253.3	6.12918		398.638	2743.67	5.91245		524.638	2306	6.00834		284.638	6524	5.71434
843	109203	44.8733		794.588	23273	6.08807		874.588	35409	6.12916		398.588	2744	5.91242		524.588	2238	6.00831		284.588	6530	5.71428
842	111806	44.8817		794.538	23206.7	6.08803		874.538	35603.7	6.12915		398.538	2757.67	5.91239		524.538	2320	6.00827		284.538	6462.67	5.71423
841	110962	44.89		794.488	23180.3	6.08799		874.488	35893.7	6.12914		398.488	2727.33	5.91236		524.488	2344	6.00824		284.488	6419.33	5.71417
840	112550	44.8984		794.438	23026.3	6.08794		874.438	35882.7	6.12912		398.438	2721.33	5.91233		524.438	2266	6.0082		284.438	6333.33	5.71411
839	111756	44.9068		794.388	22947.3	6.0879		874.388	35717.3	6.12911		398.388	2728.33	5.9123		524.388	2256	6.00817		284.388	6296	5.71406
838	111414	44.9152		794.338	22781.7	6.08786		874.338	35952.3	6.1291		398.338	2783	5.91227		524.338	2186	6.00813		284.338	6234.67	5.714
837	111585	44.9236		794.288	22718.7	6.08782		874.288	36148	6.12908		398.288	2725.33	5.91224		524.288	2190	6.00809		284.288	6076.67	5.71395
836	111264	44.932		794.238	22677.3	6.08778		874.238	36390	6.12907		398.238	2750.33	5.91221		524.238	2254	6.00806		284.238	6000.67	5.71389
835	110630	44.9404		794.188	22609	6.08773		874.188	36398	6.12906		398.188	2776	5.91219		524.188	2312	6.00802		284.188	5804	5.71384
834	112751	44.9488		794.138	22608.3	6.08769		874.138	36450.7	6.12904		398.138	2741	5.91216		524.138	2272	6.00799		284.138	5699.33	5.71378
833	114007	44.9572		794.088	22567.3	6.08765		874.088	36636.7	6.12903		398.088	2736.67	5.91213		524.088	2240	6.00795		284.088	5598	5.71372
832	111927	44.9656		794.038	22409.7	6.08761		874.038	36838.3	6.12901		398.038	2766	5.9121		524.038	2208	6.00791		284.038	5330.67	5.71367
831	110238	44.974		793.988	22420.7	6.08757		873.988	36855	6.129		397.988	2717	5.91207		523.988	2132	6.00788		283.988	5196.67	5.71361
830	110821	44.9824		793.938	22398.3	6.08753		873.938	36959.3	6.12899		397.938	2757	5.91204		523.938	2158	6.00784		283.938	5026.67	5.71356
829	111404	44.9908		793.888	22218	6.08748		873.888	37195.7	6.12897		397.888	2689	5.91201		523.888	2164	6.00781		283.888	4901.33	5.7135
828	109133	44.9992		793.838	22203.3	6.08744		873.838	37287.3	6.12896		397.838	2715.33	5.91198		523.838	2298	6.00777		283.838	4680	5.71345
827	108922	45.0076		793.788	22167	6.0874		873.788	37479	6.12895		397.788	2759.67	5.91195		523.788	2264	6.00774		283.788	4503.33	5.71339
826	107997	45.0131		793.738	22167	6.08736		873.738	37599	6.12893		397.738	2764.67	5.91192		523.738	2220	6.0077		283.738	4317.33	5.71333
825	108490	45.0173		793.688	22141	6.08732		873.688	37738.7	6.12892		397.688	2722.33	5.91189		523.688	2280	6.00766		283.688	4210.67	5.71328
824	108902	45.0215		793.638	22099.3	6.08727		873.638	37957.7	6.12891		397.638	2736.67	5.91186		523.638	2264	6.00763		283.638	4036	5.71322
823	109093	45.0258		793.588	21951.3	6.08723		873.588	38072	6.12889		397.588	2703.67	5.91183		523.588	2216	6.00759		283.588	3848	5.71317
822	109414	45.03		793.538	22060.7	6.08719		873.538	38364.7	6.12888		397.538	2670.67	5.9118		523.538	2210	6.00756		283.538	3743.33	5.71311
821	109465	45.0342		793.488	22093	6.08715		873.488	38410.3	6.12887		397.488	2685.33	5.91177		523.488	2210	6.00752		283.488	3658.67	5.71305
820	107424	45.0384		793.438	22060.7	6.08711		873.438	38519.7	6.12885		397.438	2716.33	5.91174		523.438	2132	6.00749		283.438	3497.33	5.713
819	109243	45.0426		793.388	21887	6.08706		873.388	38768	6.12884		397.388	2683.33	5.91171		523.388	2118	6.00745		283.388	3376	5.71294
818	110148	45.0468		793.338	21972.3	6.08702		873.338	38852	6.12883		397.338	2713.33	5.91169		523.338	2304	6.00741		283.338	3212	5.71289
817	110138	45.051		793.288	22029.3	6.08698		873.288	39009.7	6.12881		397.288	2688.33	5.91166		523.288	2294	6.00738		283.288	3076	5.71283
816	110017	45.0552		793.238	21990.3	6.08694		873.238	39293.7	6.1288		397.238	2724.67	5.91163		523.238	2268	6.00734		283.238	3023.33	5.71278
815	109857	45.0595		793.188	21919	6.0869		873.188	39320.3	6.12879		397.188	2732	5.9116		523.188	2256	6.00731		283.188	2979.33	5.71272
814	109746	45.0637		793.138	21944	6.08686		873.138	39453.3	6.12877		397.138	2691.67	5.91157		523.138	2196	6.00727		283.138	2842.67	5.71266
813	108590	45.0679		793.088	22006	6.08681		873.088	39447.3	6.12876		397.088	2676.67	5.91154		523.088	2312	6.00723		283.088	2782.67	5.71261
812	108681	45.0721		793.038	22066.7	6.08677		873.038	39589.7	6.12875		397.038	2709.67	5.91151		523.038	2164	6.0072		283.038	2775.33	5.71255
811	106641	45.0763		792.988	21985.7	6.08673		872.988	39601.3	6.12873		396.988	2667	5.91148		522.988	2240	6.00716		282.988	2700.67	5.7125
810	109123	45.0805		792.938	22002.3	6.08669		872.938	39658.3	6.12872		396.938	2654.67	5.91145		522.938	2336	6.00713		282.938	2622	5.71244
809	107043	45.0847		792.888	22138.3	6.08665		872.888	39559.3	6.12871		396.888	2657.33	5.91142		522.888	2206	6.00709		282.888	2611.33	5.71239
808	108249	45.089		792.838	22026	6.0866		872.838	39551	6.12869		396.838	2647.67	5.91139		522.838	2112	6.00706		282.838	2614	5.71233
807	107213	45.0932		792.788	21951.3	6.08656		872.788	39676	6.12868		396.788	2657	5.91136		522.788	2188	6.00702		282.788	2647.33	5.71227
806	106721	45.0974		792.738	21864.3	6.08652		872.738	39449	6.12867		396.738	2655	5.91133		522.738	2252	6.00698		282.738	2558.67	5.71222
805	108108	45.1016		792.688	21920.3	6.08648		872.688	39504	6.12865		396.688	2712.67	5.9113		522.688	2338	6.00695		282.688	2491.33	5.71216
804	107877	45.1058		792.638	22101.7	6.08644		872.638	39536	6.12864		396.638	2689.33	5.91127		522.638	2312	6.00691		282.638	2473.33	5.71211
803	109314	45.11		792.588	21972.3	6.08639		872.588	39364.7	6.12863		396.588	2657	5.91124		522.588	2298	6.00688		282.588	2476	5.71205
802	109857	45.1142		792.538	21972	6.08635		872.538	39336	6.12861		396.538	2615	5.91121		522.538	2266	6.00684		282.538	2476.67	5.71199
801	108791	45.1184		792.488	21935	6.08631		872.488	39064	6.1286		396.488	2647.67	5.91119		522.488	2286	6.00681		282.488	2474.67	5.71194
800	108610	45.1227		792.438	21966.7	6.08627		872.438	38922.7	6.12859		396.438	2634	5.91116		522.438	2286	6.00677		282.438	2458	5.71188
799	109706	45.1269		792.388	22148.7	6.08623		872.388	38884.3	6.12857		396.388	2652.33	5.91113						282.388	2456	5.71183
798	109304	45.1311		792.338	22055	6.08619		872.338	38640	6.12856		396.338	2708	5.9111						282.338	2489.33	5.71177
797	112269	45.1353		792.288	22009	6.08614		872.288	38195	6.12855		396.288	2623.33	5.91107						282.288	2450	5.71172
796	115424	45.1395		792.238	22133	6.0861		872.238	38044.3	6.12853		396.238	2621	5.91104						282.238	2484	5.71166
795	115967	45.1437		792.188	22079	6.08606		872.188	37935.3	6.12852		396.188	2651.67	5.91101						282.188	2511.33	5.7116
794	114319	45.1479		792.138	22122	6.08602		872.138	37568	6.12851		396.138	2633.33	5.91098						282.138	2466.67	5.71155
793	110289	45.1521		792.088	22162.7	6.08598		872.088	37394.3	6.12849		396.088	2604.67	5.91095						282.088	2439.33	5.71149
792	106922	45.1564		792.038	22068.3	6.08593		872.038	37059.3	6.12848		396.038	2640	5.91092						282.038	2446.67	5.71144
791	107093	45.1606		791.988	22041.7	6.08589		871.988	36836.7	6.12847		395.988	2646.33	5.91089						281.988	2414	5.71138
790	106098	45.1648		791.938	22168.7	6.08585		871.938	36512.3	6.12845		395.938	2638.67	5.91086						281.938	2484	5.71133
789	106701	45.169		791.888	22155	6.08581		871.888	36013.3	6.12844		395.888	2609	5.91083						281.888	2408.67	5.71127
788	108128	45.1732		791.838	22196.7	6.08577		871.838	35766.7	6.12843		395.838	2647.33	5.9108						281.838	2425.33	5.71121
787	108068	45.1774		791.788	22174.3	6.08572		871.788	35353	6.12841		395.788	2700.67	5.91077						281.788	2408.67	5.71116
786	108882	45.176		791.738	22170	6.08568		871.738	35155	6.1284		395.738	2686	5.91074						281.738	2366	5.7111
785	110751	45.172		791.688	22212.3	6.08564		871.688	34915.7	6.12839		395.688	2674.67	5.91072						281.688	2405.33	5.71105
784	113173	45.168		791.638	22247.3	6.0856		871.638	34534	6.12837		395.638	2684.33	5.91069						281.638	2435.33	5.71099
783	115937	45.164		791.588	22217.7	6.08556		871.588	33987.7	6.12836		395.588	2625.33	5.91066						281.588	2445.33	5.71093
782	119816	45.16		791.538	22187	6.08552		871.538	33696.3	6.12835		395.538	2635	5.91063						281.538	2396.67	5.71088
781	124519	45.156		791.488	22315	6.08547		871.488	33269.7	6.12833		395.488	2679.33	5.9106						281.488	2474	5.71082
780	129866	45.152		791.438	22342.7	6.08543		871.438	32943.7	6.12832		395.438	2683.33	5.91057						281.438	2442	5.71077
779	127665	45.148		791.388	22443	6.08539		871.388	32733.7	6.12831		395.388	2665.33	5.91054						281.388	2423.33	5.71071
778	117605	45.1441		791.338	22253	6.08535		871.338	32356.3	6.12829		395.338	2656.67	5.91051						281.338	2380	5.71066
777	108068	45.1401		791.288	22338.3	6.08531		871.288	32154	6.12828		395.288	2671.33	5.91048						281.288	2349.33	5.7106
776	103445	45.1361		791.238	22363.3	6.08526		871.238	31762.3	6.12826		395.238	2629.67	5.91045						281.238	2388.67	5.71054
775	100761	45.1321		791.188	22280	6.08522		871.188	31351.7	6.12825		395.188	2652.33	5.91042						281.188	2385.33	5.71049
774	100168	45.1281		791.138	22395.7	6.08518		871.138	31216	6.12824		395.138	2664.33	5.91039						281.138	2374	5.71043
773	100128	45.1241		791.088	22228.3	6.08514		871.088	30929	6.12822		395.088	2620.33	5.91036						281.088	2407.33	5.71038
772	96902.1	45.1201		791.038	22355	6.0851		871.038	30724.3	6.12821		395.038	2685.67	5.91033						281.038	2383.33	5.71032
771	93515.2	45.1161		790.988	22362.7	6.08506		870.988	30622.7	6.1282		394.988	2687	5.9103						280.988	2395.33	5.71026
770	90972.6	45.1121		790.938	22351	6.08501		870.938	30166.3	6.12818		394.938	2684.67	5.91027						280.938	2439.33	5.71021
769	87857.1	45.1081		790.888	22363.7	6.08497		870.888	29935.3	6.12817		394.888	2719	5.91024						280.888	2440.67	5.71015
768	86048.1	45.1042		790.838	22434.3	6.08493		870.838	29694.3	6.12816		394.838	2667.67	5.91022						280.838	2454.67	5.7101
767	84631	45.1002		790.788	22375	6.08489		870.788	29489	6.12814		394.788	2596.67	5.91019						280.788	2399.33	5.71004
766	83445.1	45.0962		790.738	22408	6.08485		870.738	29439.7	6.12813		394.738	2663.33	5.91016						280.738	2381.33	5.70999
765	81626.1	45.0922		790.688	22356.3	6.0848		870.688	29236.3	6.12812		394.688	2698.33	5.91013						280.688	2420	5.70993
764	79917.6	45.0882		790.638	22404	6.08476		870.638	29058	6.1281		394.638	2646	5.9101						280.638	2414.67	5.70987
763	79706.5	45.0842		790.588	22454.7	6.08472		870.588	28799.7	6.12809		394.588	2623.33	5.91007						280.588	2400.67	5.70982
762	80510.5	45.0802		790.538	22472.7	6.08468		870.538	28602.3	6.12808		394.538	2632	5.91004						280.538	2355.33	5.70976
761	78611.1	45.0762		790.488	22501.7	6.08464		870.488	28680.3	6.12806		394.488	2638.67	5.91001						280.488	2459.33	5.70971
760	79555.8	45.0722		790.438	22471.3	6.08459		870.438	28489.7	6.12805		394.438	2675.33	5.90998						280.438	2402	5.70965
759	79817.1	45.0682		790.388	22463.3	6.08455		870.388	28340.3	6.12804		394.388	2693.67	5.90995						280.388	2444	5.7096
758	79354.8	45.0643		790.338	22433.3	6.08451		870.338	28323.7	6.12802		394.338	2666.67	5.90992						280.338	2409.33	5.70954
757	79153.8	45.0603		790.288	22458.7	6.08447		870.288	28285.3	6.12801		394.288	2615.67	5.90989						280.288	2448	5.70948
756	79183.9	45.0563		790.238	22498.3	6.08443		870.238	28172.7	6.128		394.238	2638	5.90986						280.238	2388	5.70943
755	77957.8	45.0523		790.188	22540	6.08439		870.188	28127.3	6.12798		394.188	2651.33	5.90983						280.188	2421.33	5.70937
754	77756.8	45.0483		790.138	22475	6.08434		870.138	28036	6.12797		394.138	2676.33	5.9098						280.138	2429.33	5.70932
753	76078.5	45.0443		790.088	22627.3	6.0843		870.088	28052.3	6.12796		394.088	2688.33	5.90977						280.088	2462.67	5.70926
752	76882.5	45.0403		790.038	22530.3	6.08426		870.038	27914	6.12794		394.038	2656.67	5.90974						280.038	2377.33	5.7092
751	76359.9	45.0363		789.988	22576.7	6.08422		869.988	27901.7	6.12793		393.988	2664.33	5.90972						279.988	2440	5.70915
750	75505.6	45.0323		789.938	22617.3	6.08418		869.938	27813.3	6.12792		393.938	2667.33	5.90969						279.938	2368.67	5.70909
749	75093.6	45.0283		789.888	22495.7	6.08413		869.888	27903.3	6.1279		393.888	2687.67	5.90966						279.888	2369.33	5.70904
748	75726.7	45.0244		789.838	22506.7	6.08409		869.838	27777.7	6.12789		393.838	2646.67	5.90963						279.838	2438.67	5.70898
747	75696.6	45.0204		789.788	22528.3	6.08405		869.788	27657.3	6.12788		393.788	2634.33	5.9096						279.788	2460.67	5.70893
746	74269.5	45.0164		789.738	22506.3	6.08401		869.738	27732.7	6.12786		393.738	2666.33	5.90957						279.738	2475.33	5.70887
745	74601.1	45.0124		789.688	22689	6.08397		869.688	27758.3	6.12785		393.688	2665.67	5.90954						279.688	2403.33	5.70881
744	76339.8	45.0084		789.638	22531.7	6.08392		869.638	27504	6.12784		393.638	2617	5.90951						279.638	2448	5.70876
743	75274.5	45.0044		789.588	22434	6.08388		869.588	27663.3	6.12782		393.588	2649.67	5.90948						279.588	2436.67	5.7087
742	75495.6	45.0004		789.538	22580	6.08384		869.538	27703.3	6.12781		393.538	2655.67	5.90945						279.538	2422.67	5.70865
741	75907.6	44.9964		789.488	22607.7	6.0838		869.488	27847.7	6.1278		393.488	2630	5.90942						279.488	2388	5.70859
740	77264.4	44.9924		789.438	22501.7	6.08376		869.438	27592.3	6.12778		393.438	2614.67	5.90939						279.438	2446	5.70854
739	76470.4	44.9884		789.388	22512.3	6.08372		869.388	27581.3	6.12777		393.388	2643.33	5.90936						279.388	2460.67	5.70848
738	76671.4	44.9845		789.338	22567	6.08367		869.338	27659.3	6.12776		393.338	2662.33	5.90933						279.338	2502.67	5.70842
737	76460.4	44.9805		789.288	22637	6.08363		869.288	27659	6.12774		393.288	2601	5.9093						279.288	2404.67	5.70837
736	76530.7	44.9765		789.238	22598	6.08359		869.238	27644.3	6.12773		393.238	2637.67	5.90927						279.238	2401.33	5.70831
735	76751.8	44.9725		789.188	22617.7	6.08355		869.188	27722.7	6.12772		393.188	2663.67	5.90924						279.188	2440.67	5.70826
734	76641.3	44.9685		789.138	22557.3	6.08351		869.138	27672.3	6.1277		393.138	2671.67	5.90922						279.138	2442.67	5.7082
733	76581	44.9645		789.088	22638	6.08346		869.088	27708.3	6.12769		393.088	2689.33	5.90919						279.088	2416.67	5.70814
732	75576	44.9605		789.038	22772.3	6.08342		869.038	27733	6.12768		393.038	2699.67	5.90916						279.038	2421.33	5.70809
731	75756.9	44.9565		788.988	22667	6.08338		868.988	27620.7	6.12766		392.988	2670.33	5.90913						278.988	2387.33	5.70803
730	76902.6	44.9525		788.938	22546	6.08334		868.938	27830.7	6.12765		392.938	2638.33	5.9091						278.938	2418	5.70798
729	77395	44.9485		788.888	22488	6.08329		868.888	27655.3	6.12764		392.888	2656.67	5.90907						278.888	2424	5.70792
728	77274.4	44.9446		788.838	22688.7	6.08325		868.838	27696.7	6.12762		392.838	2641.67	5.90904						278.838	2384.67	5.70787
727	77465.4	44.9406		788.788	22759.7	6.08321		868.788	27630	6.12761		392.788	2657.33	5.90901						278.788	2368	5.70781
726	78721.6	44.9503		788.738	22548.7	6.08317		868.738	27855.7	6.1276		392.738	2646.67	5.90898						278.738	2406.67	5.70775
725	78560.8	44.9662		788.688	22726	6.08312		868.688	27786.3	6.12758		392.688	2686	5.90895						278.688	2429.33	5.7077
724	78892.5	44.9822		788.638	22710.7	6.08308		868.638	27828.3	6.12757		392.638	2699.67	5.90892						278.638	2380	5.70764
723	80681.4	44.9981		788.588	22757	6.08304		868.588	27911	6.12756		392.588	2664	5.90889						278.588	2360	5.70759
722	82309.5	45.014		788.538	22675.3	6.083		868.538	28026.7	6.12754		392.538	2650.67	5.90886						278.538	2372	5.70753
721	82932.6	45.03		788.488	22632.7	6.08295		868.488	28041.3	6.12753		392.488	2667.33	5.90883						278.488	2416	5.70748
720	83455.2	45.0459		788.438	22826.3	6.08291		868.438	28076.7	6.12752		392.438	2634.67	5.9088						278.438	2447.33	5.70742
719	83053.2	45.0618		788.388	22868.3	6.08287		868.388	28083.3	6.1275										278.388	2402	5.70736
718	84188.8	45.0778		788.338	22777	6.08283		868.338	28237.7	6.12749										278.338	2368	5.70731
717	86419.9	45.0937		788.288	22729.3	6.08278		868.288	28178.7	6.12747										278.288	2379.33	5.70725
716	88500.3	45.1096		788.238	22776	6.08274		868.238	28114	6.12746										278.238	2374	5.7072
715	89123.4	45.1255		788.188	22897	6.0827		868.188	28131.3	6.12745										278.188	2378.67	5.70714
714	89344.5	45.1415		788.138	22814	6.08266		868.138	28199.3	6.12743										278.138	2430	5.70708
713	88630.9	45.1574		788.088	22887.3	6.08261		868.088	28249.7	6.12742										278.088	2411.33	5.70703
712	88249	45.1733		788.038	22707.3	6.08257		868.038	28281	6.12741										278.038	2389.33	5.70697
711	86942.5	45.1893		787.988	22818.7	6.08253		867.988	28239.3	6.12739										277.988	2405.33	5.70692
710	85093.3	45.2052		787.938	22833	6.08249		867.938	28133.7	6.12738										277.938	2386	5.70686
709	83013	45.2211		787.888	22821.3	6.08244		867.888	28355	6.12737										277.888	2412	5.70681
708	81043.2	45.237		787.838	22854	6.0824		867.838	28362	6.12735										277.838	2423.33	5.70675
707	79123.6	45.253		787.788	22810	6.08236		867.788	28463.3	6.12734										277.788	2476	5.70669
706	77917.6	45.2689		787.738	22965.7	6.08232		867.738	28533.3	6.12733										277.738	2420	5.70664
705	76721.7	45.2848		787.688	23019.3	6.08227		867.688	28645.3	6.12731										277.688	2410	5.70658
704	73294.6	45.3008		787.638	23081	6.08223		867.638	28572	6.1273										277.638	2400	5.70653
703	70048.5	45.3167		787.588	22892.3	6.08219		867.588	28467	6.12729										277.588	2422	5.70647
702	68480.7	45.3326		787.538	22951.3	6.08215		867.538	28642	6.12727										277.538	2390.67	5.70642
701	66390.3	45.3485		787.488	22977.3	6.0821		867.488	28753.3	6.12726										277.488	2438	5.70636
700	64973.2	45.3645		787.438	23158.7	6.08206		867.438	28841	6.12725										277.438	2446.67	5.7063
699	64119	45.3804		787.388	22983.7	6.08202		867.388	28752	6.12723
698	62822.5	45.3963		787.338	23107.7	6.08198		867.338	28791	6.12722
697	61254.7	45.4123		787.288	23122.7	6.08193		867.288	28794.3	6.12721
696	61305	45.4282		787.238	23188.7	6.08189		867.238	28897.3	6.12719
695	60159.3	45.4441		787.188	23260.3	6.08185		867.188	28946.7	6.12718
694	59355.3	45.4601		787.138	23285.3	6.08181		867.138	28911.7	6.12717
693	59073.9	45.476		787.088	23194.3	6.08176		867.088	28886.7	6.12715
692	57837.7	45.4919		787.038	23176.3	6.08172		867.038	28954.7	6.12714
691	57676.9	45.5078		786.988	23135.3	6.08168		866.988	29007	6.12713
690	56511.1	45.5238		786.938	23330	6.08164		866.938	29090	6.12711
689	56933.2	45.5397		786.888	23300.7	6.08159		866.888	29204.7	6.1271
688	55847.8	45.5556		786.838	23335.7	6.08155		866.838	29107	6.12709
687	54862.9	45.5716		786.788	23538	6.08151		866.788	29133.7	6.12707
686	53868	45.5875		786.738	23328	6.08147		866.738	29284.3	6.12706
685	52963.5	45.6034		786.688	23266.7	6.08142		866.688	29301.3	6.12705
684	54179.5	45.6193		786.638	23236.3	6.08138		866.638	29402.7	6.12703
683	54259.9	45.6353		786.588	23413.3	6.08134		866.588	29449	6.12702
682	53486.1	45.6512		786.538	23385	6.0813		866.538	29399.7	6.12701
681	54320.2	45.6671		786.488	23343	6.08125		866.488	29276	6.12699
680	54069	45.6831		786.438	23532	6.08121		866.438	29267	6.12698
679	53978.5	45.699		786.388	23545	6.08117		866.388	29479.3	6.12697
678	53878	45.7149		786.338	23482.3	6.08113		866.338	29477.7	6.12695
677	54350.4	45.7308		786.288	23494	6.08108		866.288	29556	6.12694
676	54511.2	45.7347		786.238	23665.7	6.08104		866.238	29510.7	6.12693
675	53908.2	45.733		786.188	23580.3	6.081		866.188	29471	6.12691
674	53265	45.7314		786.138	23591.7	6.08096		866.138	29655.3	6.1269
673	54109.2	45.7297		786.088	23522	6.08091		866.088	29732	6.12689
672	55174.5	45.7281		786.038	23567	6.08087		866.038	29726.7	6.12687
671	54340.3	45.7264		785.988	23664.3	6.08083		865.988	29795	6.12686
670	55757.4	45.7248		785.938	23629	6.08079		865.938	29745	6.12685
669	55727.2	45.7231		785.888	23573	6.08074		865.888	29706.3	6.12683
668	55827.7	45.7215		785.838	23535.7	6.0807		865.838	29746.3	6.12682
667	56280	45.7199		785.788	23758.3	6.08066		865.788	29890	6.12681
666	56109.1	45.7182		785.738	23706.3	6.08062		865.738	30074	6.12679
665	56139.3	45.7166		785.688	23653	6.08057		865.688	29949	6.12678
664	56832.7	45.7149		785.638	23765.7	6.08053		865.638	30069.3	6.12677
663	57335.2	45.7133		785.588	23762.7	6.08049		865.588	30089.7	6.12675
662	58300	45.7116		785.538	23669.3	6.08045		865.538	29981.7	6.12674
661	57928.2	45.71		785.488	23729	6.0804		865.488	30010	6.12673
660	56591.5	45.7083		785.438	23851.3	6.08036		865.438	30152.3	6.12671
659	57274.9	45.7067		785.388	23820	6.08032		865.388	30240.7	6.1267
658	55707.1	45.7051		785.338	23640.3	6.08028		865.338	30035.3	6.12668
657	57244.8	45.7034		785.288	23826.3	6.08023		865.288	30304.7	6.12667
656	57114.1	45.7018		785.238	23811.7	6.08019		865.238	30347.3	6.12666
655	56430.7	45.7001		785.188	23753	6.08015		865.188	30223	6.12664
654	56229.7	45.6985		785.138	23936	6.08011		865.138	30139	6.12663
653	57033.7	45.6968		785.088	23822.7	6.08006		865.088	30483.7	6.12662
652	57827.7	45.6952		785.038	23948	6.08002		865.038	30412	6.1266
651	57606.6	45.6935		784.988	23864.3	6.07998		864.988	30487	6.12659
650	60109	45.6919		784.938	24010	6.07994		864.938	30543.7	6.12658
649	62139.1	45.6903		784.888	23942.7	6.07989		864.888	30720.7	6.12656
648	64852.6	45.6886		784.838	23935	6.07985		864.838	30557.7	6.12655
647	67897.8	45.687		784.788	23984.3	6.07981		864.788	30719.7	6.12654
646	71184.1	45.6853		784.738	23998.3	6.07977		864.738	30748	6.12652
645	73153.9	45.6837		784.688	24074.7	6.07972		864.688	30851	6.12651
644	75204.1	45.682		784.638	24181.3	6.07968		864.638	31009	6.1265
643	75043.3	45.6804		784.588	24065.7	6.07964		864.588	31025.7	6.12648
642	74973	45.6787		784.538	24046.3	6.0796		864.538	31147	6.12647
641	75003.1	45.6771		784.488	24084.3	6.07955		864.488	31112.3	6.12646
640	70852.5	45.6755		784.438	24135.7	6.07951		864.438	31167	6.12644
639	67314.9	45.6738		784.388	24297.3	6.07947		864.388	31198	6.12643
638	65515.9	45.6722		784.338	24145	6.07943		864.338	31229.3	6.12642
637	61385.4	45.6705		784.288	24244	6.07938		864.288	31411.3	6.1264
636	58109.1	45.6689		784.238	24187.3	6.07934		864.238	31690	6.12639
635	53134.3	45.6672		784.188	24234	6.0793		864.188	31667	6.12638
634	48320.4	45.6656		784.138	24331.7	6.07926		864.138	31667	6.12636
633	46380.7	45.6639		784.088	24284.3	6.07921		864.088	31763.3	6.12635
632	43777.8	45.6623		784.038	24405.3	6.07917		864.038	31825.3	6.12634
631	43526.5	45.6607		783.988	24512.7	6.07913		863.988	31931.3	6.12632
630	43305.4	45.659		783.938	24315	6.07909		863.938	31973	6.12631
629	43536.6	45.6574		783.888	24555	6.07904		863.888	32147	6.1263
628	43627	45.6557		783.838	24611.7	6.079		863.838	32342	6.12628
627	44159.7	45.6541		783.788	24641.3	6.07896		863.788	32339.7	6.12627
626	44340.6	45.6524		783.738	24689.7	6.07892		863.738	32486	6.12626
625	42622	45.6508		783.688	24583.3	6.07887		863.688	32596	6.12624
624	42220	45.6491		783.638	24708	6.07883		863.638	32803	6.12623
623	42561.7	45.6475		783.588	24697.3	6.07879		863.588	32940	6.12622
622	41797.9	45.6459		783.538	24722	6.07875		863.538	32976.3	6.1262
621	40833.1	45.6442		783.488	24858	6.0787		863.488	32997.3	6.12619
620	39275.4	45.6426		783.438	24841.7	6.07866		863.438	33144	6.12618
619	39727.6	45.6409		783.388	24930.7	6.07862		863.388	33248	6.12616
618	37687.5	45.6393		783.338	25019	6.07858		863.338	33371.3	6.12615
617	35868.4	45.6376		783.288	25075.7	6.07853		863.288	33350.3	6.12614
616	36310.6	45.6508		783.238	25058.3	6.07849		863.238	33623.7	6.12612
615	36230.2	45.6707		783.188	25324.3	6.07845		863.188	33773	6.12611
614	35667.4	45.6906		783.138	25299.7	6.07841		863.138	33923.7	6.1261
613	35556.9	45.7105		783.088	25388.3	6.07836		863.088	34110	6.12608
612	35335.8	45.7304		783.038	25370.7	6.07832		863.038	34146.3	6.12607
611	34893.6	45.7503		782.988	25297.3	6.07828		862.988	34360.3	6.12606
610	35325.7	45.7701		782.938	25542	6.07824		862.938	34407	6.12604
609	35466.4	45.79		782.888	25607.7	6.07819		862.888	34575.3	6.12603
608	35637.3	45.8099		782.838	25786	6.07815		862.838	34697.7	6.12602
607	35074.5	45.8298		782.788	25866.3	6.07811		862.788	34850.7	6.126
606	34974	45.8497		782.738	26079.7	6.07807		862.738	35007.7	6.12599
605	35476.5	45.8695		782.688	26058.3	6.07802		862.688	35058	6.12598
604	35074.5	45.8894		782.638	26029.7	6.07798		862.638	35252.3	6.12596
603	35084.5	45.9093		782.588	26282.3	6.07794		862.588	35296.7	6.12595
602	35275.5	45.9292		782.538	26242.7	6.0779		862.538	35315	6.12594
601	36290.5	45.9491		782.488	26457.7	6.07785		862.488	35629.7	6.12592
600	35295.6	45.969		782.438	26333.7	6.07781		862.438	35679.7	6.12591
599	35717.7	45.9888		782.388	26431.3	6.07777		862.388	35774	6.12589
598	36340.8	46.0087		782.338	26631.3	6.07773		862.338	35832	6.12588
597	36260.4	46.0286		782.288	26660.7	6.07768		862.288	35796.7	6.12587
596	35838.3	46.0485		782.238	26856.7	6.07764		862.238	35920.7	6.12585
595	34923.7	46.0684		782.188	26845.3	6.0776		862.188	36038.7	6.12584
594	34682.5	46.0883		782.138	26886.7	6.07756		862.138	35977	6.12583
593	34903.6	46.1081		782.088	27042.3	6.07751		862.088	35950.3	6.12581
592	35416.2	46.128		782.038	27162.7	6.07747		862.038	36113	6.1258
591	34803.1	46.1479		781.988	27264	6.07743		861.988	36335	6.12579
590	36190	46.1678		781.938	27362.7	6.07739		861.938	36457	6.12577
589	35456.4	46.1877		781.888	27482.7	6.07734		861.888	36379.3	6.12576
588	36340.8	46.2076		781.838	27600.3	6.0773		861.838	36421.3	6.12575
587	35446.3	46.2274		781.788	27820	6.07726		861.788	36670	6.12573
586	34913.7	46.2473		781.738	27958	6.07722		861.738	36591.3	6.12572
585	35034.3	46.2672		781.688	28084.3	6.07717		861.688	36308.3	6.12571
584	36210.1	46.2871		781.638	28073.7	6.07713		861.638	36446.7	6.12569
583	36300.6	46.307		781.588	28203	6.07709		861.588	36702	6.12568
582	36039.3	46.3268		781.538	28494.7	6.07705		861.538	36630	6.12567
581	36833.2	46.3467		781.488	28548.7	6.077		861.488	36728.3	6.12565
580	36220.2	46.3666		781.438	28546.7	6.07696		861.438	36690	6.12564
579	36471.4	46.3865		781.388	28679.7	6.07692		861.388	36700.7	6.12563
578	37456.3	46.4064		781.338	28810	6.07688		861.338	36779	6.12561
577	36823.2	46.4263		781.288	28827.7	6.07683		861.288	36713.7	6.1256
576	36310.6	46.4177		781.238	29081.3	6.07679		861.238	36754	6.12559
575	36461.4	46.3965		781.188	29239.7	6.07675		861.188	36694.7	6.12557
574	35858.4	46.3752		781.138	29266	6.07671		861.138	36718	6.12556
573	35958.9	46.3539		781.088	29174.3	6.07666		861.088	36824	6.12555
572	36471.4	46.3326		781.038	29231.3	6.07662		861.038	36786.7	6.12553
571	36049.3	46.3113		780.988	29337.7	6.07658		860.988	36838	6.12552
570	36793	46.2901		780.938	29635.7	6.07654		860.938	36786.3	6.12551
569	36180	46.2688		780.888	29654.3	6.07649		860.888	36836	6.12549
568	36973.9	46.2475		780.838	29589	6.07645		860.838	36937.3	6.12548
567	36652.3	46.2262		780.788	29647	6.07641		860.788	36845	6.12547
566	36803.1	46.2049		780.738	29648.7	6.07637		860.738	36981.3	6.12545
565	36180	46.1836		780.688	29641	6.07632		860.688	36974.7	6.12544
564	36431.2	46.1624		780.638	29643	6.07628		860.638	36964	6.12543
563	36019.2	46.1411		780.588	29633.3	6.07624		860.588	36798.7	6.12541
562	36511.6	46.1198		780.538	29617	6.0762		860.538	36599	6.1254
561	36531.7	46.0985		780.488	29594.3	6.07615		860.488	36644.3	6.12539
560	36521.7	46.0772		780.438	29534.3	6.07611		860.438	36644.3	6.12537
559	36230.2	46.056		780.388	29467	6.07607		860.388	36441.7	6.12536
558	36873.4	46.0347		780.338	29420.7	6.07603		860.338	36424.7	6.12535
557	38250.3	46.0134		780.288	29138	6.07598		860.288	36346	6.12533
556	39375.9	45.9921		780.238	29184.7	6.07594		860.238	36388	6.12532
555	40270.3	45.9708		780.188	29065.3	6.0759		860.188	36229.7	6.12531
554	41596.9	45.9495		780.138	28736.7	6.07586		860.138	36145.3	6.12529
553	40903.5	45.9283		780.088	28614	6.07581		860.088	35842.7	6.12528
552	40049.2	45.907		780.038	28510.7	6.07577		860.038	35836.7	6.12527
551	38963.8	45.8857		779.988	28279.3	6.07573		859.988	35639.7	6.12525
550	38531.7	45.8644		779.938	28128	6.07569		859.938	35393	6.12524
549	36994	45.8431		779.888	27883	6.07564		859.888	35278	6.12523
548	35918.7	45.8219		779.838	27812	6.0756		859.838	35210.7	6.12521
547	34712.7	45.8006		779.788	27600.3	6.07556		859.788	35070.7	6.1252
546	34953.9	45.7793		779.738	27390.3	6.07552		859.738	34941.7	6.12519
545	32722.8	45.758		779.688	27003.3	6.07547		859.688	34753	6.12517
544	31526.8	45.7367		779.638	26864	6.07543		859.638	34799.7	6.12516
543	29677.6	45.7155		779.588	26626.3	6.07539		859.588	34663.3	6.12515
542	26974.2	45.6942		779.538	26411.3	6.07535		859.538	34329.3	6.12513
541	26702.8	45.6729		779.488	26127.7	6.0753		859.488	34089.7	6.12512
540	26481.7	45.6516		779.438	25940.3	6.07526		859.438	33981.7	6.1251
539	26140	45.6303		779.388	25786	6.07522		859.388	33681	6.12509
538	25225.5	45.609		779.338	25613	6.07518		859.338	33787	6.12508
537	25778.2	45.5878		779.288	25364	6.07513		859.288	33675.7	6.12506
536	25959.1	45.5665		779.238	24963	6.07509		859.238	33582.7	6.12505
535	25707.9	45.5452		779.188	24874	6.07505		859.188	33453.7	6.12504
534	30290.7	45.5239		779.138	24713.3	6.07501		859.138	33353.7	6.12502
533	39094.5	45.5026		779.088	24359	6.07496		859.088	33129.3	6.12501
532	57264.9	45.4814		779.038	24190.3	6.07492		859.038	33129.7	6.125
531	93655.9	45.4601		778.988	24078.3	6.07488		858.988	33154.7	6.12498
530	141695	45.4388		778.938	23880.3	6.07484		858.938	33113.7	6.12497
529	140117	45.4175		778.888	23790	6.07479		858.888	32810	6.12496
528	82118.5	45.3962		778.838	23661.3	6.07475		858.838	32862.3	6.12494
527	34421.2	45.3749		778.788	23265.7	6.07471		858.788	32875	6.12493
526	19185.4	45.3537		778.738	23112.3	6.07467		858.738	32909.7	6.12492
525	15838.8	45.3324		778.688	22881.3	6.07462		858.688	32994.7	6.1249
524	14190.6	45.3111		778.638	22861	6.07458		858.638	32896.7	6.12489
523	13668	45.2898		778.588	22681.3	6.07454		858.588	32877	6.12488
522	13547.4	45.2685		778.538	22507.3	6.0745		858.538	32976.7	6.12486
521	12823.8	45.2473		778.488	22398	6.07445		858.488	32904.7	6.12485
520	13125.3	45.226		778.438	22295.7	6.07441		858.438	32815.3	6.12484
519	13316.2	45.2047		778.388	22219.3	6.07437		858.388	33027.7	6.12482
518	12793.6	45.1834		778.338	22202.3	6.07433		858.338	33056	6.12481
517	12733.3	45.1621		778.288	21954	6.07428		858.288	32909.3	6.1248
516	12652.9	45.1598		778.238	21932	6.07424		858.238	33143.3	6.12478
515	12874	45.166		778.188	21941	6.0742		858.188	33382.3	6.12477
514	12512.2	45.1722		778.138	21920	6.07416		858.138	33419.7	6.12476
513	12723.3	45.1784		778.088	21803.7	6.07411		858.088	33519	6.12474
512	12321.3	45.1846		778.038	21598.3	6.07407		858.038	33479	6.12473
511	12341.4	45.1908		777.988	21650.7	6.07403		857.988	33537.7	6.12472
510	12622.8	45.197		777.938	21762.7	6.07399		857.938	33629.7	6.1247
509	12984.6	45.2032		777.888	21597	6.07394		857.888	33832.7	6.12469
508	13014.7	45.2095		777.838	21520.7	6.0739		857.838	33996.7	6.12468
507	12703.2	45.2157		777.788	21571	6.07386		857.788	34135.7	6.12466
506	12602.7	45.2219		777.738	21549.3	6.07382		857.738	34282	6.12465
505	12813.7	45.2281		777.688	21482.7	6.07377		857.688	34331.3	6.12464
504	12904.2	45.2343		777.638	21501.3	6.07373		857.638	34670.7	6.12462
503	12803.7	45.2405		777.588	21381.7	6.07369		857.588	34730	6.12461
502	13034.8	45.2467		777.538	21353.7	6.07365		857.538	34810.7	6.1246
501	12853.9	45.2529		777.488	21337.3	6.0736		857.488	35106	6.12458
500	12793.6	45.2591		777.438	21262.7	6.07356		857.438	35272.7	6.12457
499	12743.4	45.2653		777.388	21274.7	6.07352		857.388	35591	6.12456
498	13075	45.2715		777.338	21381	6.07348		857.338	35719.3	6.12454
497	12663	45.2777		777.288	21515.3	6.07343		857.288	36018.7	6.12453
496	12763.5	45.2839		777.238	21376.7	6.07339		857.238	36152.7	6.12452
495	12331.3	45.2901		777.188	21423.3	6.07335		857.188	36210.7	6.1245
494	12421.8	45.2963		777.138	21284.7	6.07331		857.138	36652.3	6.12449
493	13155.4	45.3025		777.088	21196	6.07326		857.088	36924.3	6.12448
492	13044.9	45.3087		777.038	21317	6.07322		857.038	37325	6.12446
491	12552.4	45.3149		776.988	21315.7	6.07318		856.988	37497.7	6.12445
490	12874	45.3211		776.938	21200.3	6.07314		856.938	37898.7	6.12444
489	13004.7	45.3273		776.888	21275	6.07309		856.888	38156.7	6.12442
488	12914.2	45.3335		776.838	21180	6.07305		856.838	38575.3	6.12441
487	12733.3	45.3397		776.788	21212	6.07301		856.788	38936.7	6.1244
486	13185.6	45.3459		776.738	21215.7	6.07297		856.738	39161.7	6.12438
485	12894.1	45.3521		776.688	21333.7	6.07292		856.688	39646	6.12437
484	13235.8	45.3583		776.638	21336	6.07288		856.638	40154	6.12435
483	13034.8	45.3645		776.588	21220.3	6.07284		856.588	40353.3	6.12434
482	13326.3	45.3708		776.538	21256	6.0728		856.538	40809	6.12433
481	12934.3	45.377		776.488	21185	6.07275		856.488	41358	6.12431
480	12984.6	45.3832		776.438	21114.7	6.07271		856.438	41739.3	6.1243
479	12974.5	45.3894		776.388	21057.7	6.07267		856.388	42185.7	6.12429
478	12793.6	45.3956		776.338	21135.7	6.07263		856.338	42413.7	6.12427
477	12542.4	45.4018		776.288	21154.7	6.07258		856.288	42934.7	6.12426
476	13456.9	45.4151		776.238	21169.7	6.07254		856.238	43515.3	6.12425
475	12803.7	45.4317		776.188	21116.3	6.0725		856.188	43922.3	6.12423
474	12632.8	45.4482		776.138	21077	6.07246		856.138	44315.7	6.12422
473	12652.9	45.4648		776.088	21090.3	6.07241		856.088	44712.3	6.12421
472	13165.5	45.4814		776.038	21185.7	6.07237		856.038	45362	6.12419
471	13014.7	45.4979		775.988	21106.3	6.07233		855.988	45730.7	6.12418
470	12673	45.5145		775.938	21156.3	6.07229		855.938	46175.3	6.12417
469	12843.9	45.531		775.888	21259.3	6.07224		855.888	46583.7	6.12415
468	12833.8	45.5476		775.838	21114.7	6.0722		855.838	47015.3	6.12414
467	12994.6	45.5642		775.788	21102.7	6.07216		855.788	47234.3	6.12413
466	12632.8	45.5807		775.738	21076	6.07212		855.738	47615.7	6.12411
465	12864	45.5973		775.688	21003	6.07207		855.688	47947.7	6.1241
464	12843.9	45.6139		775.638	21035.3	6.07203		855.638	48150	6.12409
463	12783.6	45.6304		775.588	21073.3	6.07199		855.588	48481	6.12407
462	13306.2	45.647		775.538	21143.3	6.07195		855.538	48550.7	6.12406
461	12763.5	45.6635		775.488	20994	6.0719		855.488	48988.3	6.12405
460	13255.9	45.6801		775.438	20961	6.07186		855.438	49109.7	6.12403
459	13024.8	45.6967		775.388	20957.7	6.07182		855.388	49065.7	6.12402
458	13115.2	45.7132		775.338	21022	6.07178		855.338	49380.7	6.12401
457	13044.9	45.7298		775.288	21031	6.07173		855.288	49444	6.12399
456	12954.4	45.7463		775.238	20967.7	6.07169		855.238	49294	6.12398
455	12984.6	45.7629		775.188	20935.7	6.07165		855.188	49422.3	6.12397
454	12964.5	45.7795		775.138	20989.7	6.07161		855.138	49311.3	6.12395
453	12763.5	45.796		775.088	20915.3	6.07156		855.088	49236.3	6.12394
452	13105.2	45.8126		775.038	20906.7	6.07152		855.038	49007.7	6.12393
451	12522.3	45.8291		774.988	20853.7	6.07148		854.988	48850	6.12391
450	13326.3	45.8457		774.938	20853.7	6.07144		854.938	48579	6.1239
449	12562.5	45.8623		774.888	20825	6.07139		854.888	48190.7	6.12389
448	13245.9	45.8788		774.838	21030.3	6.07135		854.838	48134	6.12387
447	13095.1	45.8954		774.788	20923	6.07131		854.788	47658.7	6.12386
446	13326.3	45.9119		774.738	20727.7	6.07127		854.738	47118.7	6.12385
445	13004.7	45.9285		774.688	20888.3	6.07122		854.688	46596.3	6.12383
444	13456.9	45.9451		774.638	20898.3	6.07118		854.638	46268.7	6.12382
443	13215.7	45.9616		774.588	20865.7	6.07114		854.588	45568	6.12381
442	12753.4	45.9782		774.538	20961	6.0711		854.538	45021	6.12379
441	13336.3	45.9947		774.488	20960.7	6.07105		854.488	44381	6.12378
440	13205.7	46.0113		774.438	20809.3	6.07101		854.438	43539.7	6.12377
439	12703.2	46.0279		774.388	20841.3	6.07097		854.388	42651.7	6.12375
438	13266	46.0444		774.338	20663.7	6.07093		854.338	41965	6.12374
437	12763.5	46.061		774.288	20846.3	6.07088		854.288	41102.7	6.12373
436	12793.6	46.0775		774.238	20714.3	6.07084		854.238	40375.3	6.12371
435	13075	46.0941		774.188	20724	6.0708		854.188	39419.3	6.1237
434	12894.1	46.1107		774.138	20730.3	6.07076		854.138	38580	6.12369
433	13075	46.1272		774.088	20711	6.07071		854.088	37677.3	6.12367
432	13034.8	46.1438		774.038	20618	6.07067		854.038	36737.3	6.12366
431	13557.4	46.1603		773.988	20721.3	6.07063		853.988	35810	6.12365
430	13718.2	46.1769		773.938	20719.3	6.07059		853.938	35008	6.12363
429	13306.2	46.1935		773.888	20654.7	6.07054		853.888	34121	6.12362
428	13366.5	46.21		773.838	20522.3	6.0705		853.838	33492	6.12361
427	13145.4	46.2266		773.788	20511	6.07046		853.788	32641	6.12359
426	12713.2	46.2543		773.738	20569.7	6.07042		853.738	31904.3	6.12358
425	12994.6	46.287		773.688	20434	6.07037		853.688	31028	6.12356
424	13336.3	46.3198		773.638	20405	6.07033		853.638	30515	6.12355
423	13718.2	46.3525		773.588	20607.7	6.07029		853.588	29784.3	6.12354
422	13436.8	46.3852		773.538	20462	6.07025		853.538	29201.3	6.12352
421	13205.7	46.418		773.488	20520	6.0702		853.488	28680.3	6.12351
420	13467	46.4507		773.438	20546.7	6.07016		853.438	28228.7	6.1235
419	13155.4	46.4834		773.388	20514.3	6.07012		853.388	27571.7	6.12348
418	12984.6	46.5162		773.338	20376.3	6.07008		853.338	27224.7	6.12347
417	13195.6	46.5489		773.288	20329	6.07003		853.288	26976	6.12346
416	12753.4	46.5816		773.238	20271.3	6.06999		853.238	26550	6.12344
415	13085.1	46.6143		773.188	20232.3	6.06995		853.188	26318.7	6.12343
414	13245.9	46.6471		773.138	20286.3	6.06991		853.138	26003.3	6.12342
413	13195.6	46.6798		773.088	20313	6.06986		853.088	25729.7	6.1234
412	13034.8	46.7125		773.038	20311.7	6.06982		853.038	25434.3	6.12339
411	12833.8	46.7453		772.988	20341.7	6.06978		852.988	25311	6.12338
410	13296.1	46.778		772.938	20205.3	6.06974		852.938	25241.3	6.12336
409	13577.5	46.8107		772.888	20176.3	6.06969		852.888	25096.3	6.12335
408	13738.3	46.8435		772.838	20174.3	6.06965		852.838	24963.7	6.12334
407	13848.9	46.8762		772.788	20147	6.06961		852.788	24539	6.12332
406	14693.1	46.9089		772.738	20132.3	6.06957		852.738	24581.3	6.12331
405	15678	46.9417		772.688	20064.3	6.06952		852.688	24537	6.1233
404	15547.3	46.9744		772.638	20027.3	6.06948		852.638	24322.3	6.12328
403	14572.5	47.0071		772.588	19998.3	6.06944		852.588	24242	6.12327
402	13567.5	47.0398		772.538	19993.7	6.0694		852.538	24290.3	6.12326
401	13085.1	47.0726		772.488	20056	6.06935		852.488	24191.7	6.12324
400	13245.9	47.1053		772.438	19933.3	6.06931		852.438	24137.3	6.12323
399	12683.1	47.138						852.388	23972.7	6.12322
398	13376.5	47.1708						852.338	23951	6.1232
397	13728.3	47.2035						852.288	23932.3	6.12319
396	12874	47.2362						852.238	23942.3	6.12318
395	12974.5	47.269						852.188	23923.3	6.12316
394	13155.4	47.3017						852.138	23906.7	6.12315
393	13245.9	47.3344						852.088	23709	6.12314
392	13125.3	47.3672						852.038	23867.7	6.12312
391	13095.1	47.3999						851.988	23734	6.12311
390	12783.6	47.4326						851.938	23580.7	6.1231
389	12894.1	47.4653						851.888	23743.7	6.12308
388	13125.3	47.4981						851.838	23790.7	6.12307
387	13175.5	47.5308						851.788	23548.7	6.12306
386	13205.7	47.4911						851.738	23456.7	6.12304
385	13627.8	47.4189						851.688	23543.3	6.12303
384	12874	47.3468						851.638	23454.3	6.12302
383	12813.7	47.2746						851.588	23618.3	6.123
382	12783.6	47.2024						851.538	23486	6.12299
381	13065	47.1302						851.488	23546.7	6.12298
380	13145.4	47.058						851.438	23546.3	6.12296
379	13396.6	46.9858						851.388	23546	6.12295
378	13054.9	46.9136						851.338	23456.7	6.12294
377	13386.6	46.8414						851.288	23323	6.12292
376	13054.9	46.7692						851.238	23309.7	6.12291
375	13527.3	46.697						851.188	23412	6.1229
374	13276	46.6248						851.138	23570.3	6.12288
373	13125.3	46.5526						851.088	23473.7	6.12287
372	13446.9	46.4804						851.038	23416.3	6.12286
371	13436.8	46.4082						850.988	23517	6.12284
370	13125.3	46.336						850.938	23312	6.12283
369	13165.5	46.2638						850.888	23420.3	6.12282
368	13105.2	46.1916						850.838	23420.7	6.1228
367	12733.3	46.1195						850.788	23289.7	6.12279
366	13195.6	46.0473						850.738	23359.7	6.12277
365	13497.1	45.9751						850.688	23407	6.12276
364	13567.5	45.9029						850.638	23344.7	6.12275
363	13647.9	45.8307						850.588	23326.7	6.12273
362	13456.9	45.7585						850.538	23416.7	6.12272
361	13557.4	45.6863						850.488	23302	6.12271
360	13456.9	45.6141						850.438	23220.7	6.12269
359	13436.8	45.5419						850.388	23301.3	6.12268
358	13195.6	45.4697						850.338	23313.3	6.12267
357	13416.7	45.3975						850.288	23180	6.12265
356	13266	45.3253						850.238	23352	6.12264
355	13034.8	45.2531						850.188	23431	6.12263
354	13557.4	45.1809						850.138	23392	6.12261
353	13044.9	45.1087						850.088	23412.7	6.1226
352	13255.9	45.0365						850.038	23310	6.12259
351	13426.8	44.9643						849.988	23367	6.12257
350	13808.7	44.8922						849.938	23349	6.12256
349	12894.1	44.82						849.888	23358.7	6.12255
348	13346.4	44.7478						849.838	23352.3	6.12253
347	13889.1	44.6756						849.788	23318	6.12252
346	13668	44.6034						849.738	23321	6.12251
345	13999.6	44.5312						849.688	23342.7	6.12249
344	13668	44.459						849.638	23218	6.12248
343	13929.3	44.3868						849.588	23163.7	6.12247
342	13155.4	44.3146						849.538	23247.7	6.12245
341	13356.4	44.2424						849.488	23263	6.12244
340	13818.7	44.1702						849.438	23232.7	6.12243
339	13949.4	44.098						849.388	23200	6.12241
338	13698.1	44.0258						849.338	23271.3	6.1224
337	13517.2	43.9536						849.288	23260.7	6.12239
336	13808.7	43.8814						849.238	23188.3	6.12237
335	13869	43.8092						849.188	23163.3	6.12236
334	13869	43.7371						849.138	23165	6.12235
333	13989.6	43.6649						849.088	23179.3	6.12233
332	13627.8	43.5927						849.038	23225.7	6.12232
331	13356.4	43.5205						848.988	23076.7	6.12231
330	13989.6	43.4483						848.938	23135.3	6.12229
329	14100.1	43.3761						848.888	23249.3	6.12228
328	13557.4	43.3039						848.838	23421.3	6.12227
327	13647.9	43.2317						848.788	23365.3	6.12225
326	14019.7	43.1595						848.738	23287	6.12224
325	13637.8	43.0873						848.688	23163	6.12223
324	13718.2	43.0151						848.638	23195.3	6.12221
323	13627.8	42.9429						848.588	23292.3	6.1222
322	13698.1	42.8707						848.538	23224	6.12219
321	13356.4	42.7985						848.488	23322.3	6.12217
320	13949.4	42.7263						848.438	23334.3	6.12216
319	13738.3	42.6541						848.388	23400.7	6.12215
318	13386.6	42.5819						848.338	23175.7	6.12213
317	13788.6	42.5098						848.288	23312.7	6.12212
316	14009.7	42.4376						848.238	23175.3	6.12211
315	13999.6	42.3654						848.188	23232	6.12209
314	14110.2	42.2932						848.138	23227	6.12208
313	13537.3	42.221						848.088	23195.7	6.12207
312	14009.7	42.1488						848.038	23209.3	6.12205
311	13979.5	42.0766						847.988	23253.3	6.12204
310	14512.2	42.0044						847.938	23214.3	6.12203
309	14260.9	41.9322						847.888	23260.3	6.12201
308	13969.5	41.86						847.838	23320	6.122
307	14361.4	41.7878						847.788	23252.7	6.12198
306	14110.2	41.7156						847.738	23209.7	6.12197
305	14160.4	41.6434						847.688	23200.7	6.12196
304	13999.6	41.5712						847.638	23267	6.12194
303	14411.7	41.499						847.588	23338.7	6.12193
302	14200.6	41.4268						847.538	23261	6.12192
301	14029.8	41.3547						847.488	23182	6.1219
300	13949.4	41.2825						847.438	23273.7	6.12189
299	13718.2	41.2103						847.388	23377	6.12188
298	13647.9	41.1381						847.338	23222.7	6.12186
297	13195.6	41.0659						847.288	23260.7	6.12185
296	13195.6	41.039						847.238	23319.7	6.12184
295	12663	41.0325						847.188	23217	6.12182
294	13396.6	41.026						847.138	23248.3	6.12181
293	13567.5	41.0195						847.088	23200.7	6.1218
292	13567.5	41.013						847.038	23119	6.12178
291	13054.9	41.0066						846.988	23225.7	6.12177
290	13828.8	41.0001						846.938	23183.3	6.12176
289	14572.5	40.9936						846.888	23239	6.12174
288	16562.4	40.9871						846.838	23240.3	6.12173
287	18934.2	40.9806						846.788	23194	6.12172
286	19537.2	40.9741						846.738	23162.7	6.1217
285	20029.6	40.9676						846.688	23275.7	6.12169
284	22592.4	40.9611						846.638	23287.7	6.12168
283	23024.5	40.9546						846.588	23246.7	6.12166
282	18451.8	40.9481						846.538	23158.3	6.12165
281	14150.4	40.9416						846.488	23203.3	6.12164
280	12823.8	40.9351						846.438	23139.3	6.12162
279	12311.2	40.9286						846.388	23244.7	6.12161
278	12482.1	40.9222						846.338	23221	6.1216
277	12200.7	40.9157						846.288	23236	6.12158
276	11818.8	40.9092						846.238	23129.3	6.12157
275	11989.6	40.9027						846.188	23268.3	6.12156
274	11919.3	40.8962						846.138	23333	6.12154
273	12160.5	40.8897						846.088	23402	6.12153
272	12421.8	40.8832						846.038	23264	6.12152
271	11658	40.8767						845.988	23270	6.1215
270	11979.6	40.8702						845.938	23397.3	6.12149
269	11909.2	40.8637						845.888	23238.3	6.12148
268	11758.5	40.8572						845.838	23311.3	6.12146
267	12250.9	40.8507						845.788	23262	6.12145
266	12401.7	40.8442						845.738	23374	6.12144
265	12240.9	40.8377						845.688	23196.3	6.12142
264	11989.6	40.8313						845.638	23306.3	6.12141
263	12130.3	40.8248						845.588	23159.7	6.1214
262	12220.8	40.8183						845.538	23224	6.12138
261	11909.2	40.8118						845.488	23217.7	6.12137
260	12532.3	40.8053						845.438	23293	6.12136
259	12743.4	40.7988
258	12230.8	40.7923
257	12220.8	40.7858
256	12029.8	40.7793
255	12070	40.7728
254	12431.8	40.7663
253	12622.8	40.7598
252	12351.4	40.7533
251	12220.8	40.7469
250	12150.4	40.7404
249	12351.4	40.7339
248	12321.3	40.7274
247	12853.9	40.7209
246	12240.9	40.7057
245	12371.5	40.6865
244	12220.8	40.6674
243	12642.9	40.6483
242	12381.6	40.6292
241	12572.5	40.61
240	12130.3	40.5909
239	12311.2	40.5718
238	13115.2	40.5526
237	12592.6	40.5335
236	12401.7	40.5144
235	12441.9	40.4953
234	12230.8	40.4761
233	12693.1	40.457
232	12733.3	40.4379
231	12753.4	40.4187
230	12462	40.3996
229	11959.5	40.3805
228	12462	40.3613
227	12864	40.3422
226	12723.3	40.3231
225	12472	40.304
224	12401.7	40.2848
223	12371.5	40.2657
222	12612.7	40.2466
221	12291.1	40.2274
220	12502.2	40.2083
219	12552.4	40.1892
218	12351.4	40.1701
217	12351.4	40.1509
216	12673	40.1318
215	12652.9	40.1127
214	12813.7	40.0935
213	12421.8	40.0744
212	12331.3	40.0553
211	12683.1	40.0361
210	12874	40.017
209	12210.7	39.9979
208	11999.7	39.9788
207	12462	39.9596
206	12532.3	39.9405
205	12934.3	39.9214
204	12281.1	39.9022
203	12562.5	39.8831
202	12763.5	39.864
201	13326.3	39.8449
200	12833.8	39.8257
199	12441.9	39.8066
198	12733.3	39.7875
197	12783.6	39.7683
196	12693.1	39.7492
195	12612.7	39.7301
194	12532.3	39.7109
193	12703.2	39.6918
192	12894.1	39.6727
191	13266	39.6536
190	12914.2	39.6344
189	12904.2	39.6153
188	12733.3	39.5962
187	13044.9	39.577
186	13014.7	39.551
185	12843.9	39.522
184	12703.2	39.4929
183	12964.5	39.4638
182	12884.1	39.4347
181	13205.7	39.4056
180	12994.6	39.3766
179	12632.8	39.3475
178	12904.2	39.3184
177	13044.9	39.2893
176	12793.6	39.2602
175	12783.6	39.2311
174	13346.4	39.2021
173	13185.6	39.173
172	12622.8	39.1439
171	13255.9	39.1148
170	13748.4	39.0857
169	13105.2	39.0566
168	12753.4	39.0276
167	12874	38.9985
166	13396.6	38.9694
165	12894.1	38.9403
164	13517.2	38.9112
163	13346.4	38.8822
162	13396.6	38.8531
161	13577.5	38.824
160	13778.5	38.7949
159	13587.6	38.7658
158	13497.1	38.7367
157	13446.9	38.7077
156	13024.8	38.6786
155	13346.4	38.6495
154	13567.5	38.6204
153	13728.3	38.5913
152	13808.7	38.5622
151	13838.8	38.5332
150	13718.2	38.5041
149	13266	38.475
148	13426.8	38.4459
147	13336.3	38.4168
146	13467	38.3878
145	13728.3	38.3587
144	13959.4	38.3296
143	14311.2	38.3005
142	14421.7	38.2714
141	14472	38.2423
140	13848.9	38.2133
139	13255.9	38.1842
138	13215.7	38.1551
137	13788.6	38.126
136	13818.7	38.0969
135	13738.3	38.0679
134	14009.7	38.0388
133	13989.6	38.0097
132	13286.1	37.9806
131	13366.5	37.9515
130	13477	37.9122
129	13497.1	37.8683
128	13909.2	37.8244
127	13456.9	37.7805
126	13155.4	37.7367
125	13446.9	37.6928
124	13607.7	37.6489
123	13778.5	37.605
122	14472	37.5611
121	14532.3	37.5172
120	14733.3	37.4733
119	15125.2	37.4294
118	15507.1	37.3855
117	15949.3	37.3416
116	16602.6	37.2977
115	16492	37.2539
114	17366.4	37.21
113	17949.3	37.1661
112	19115.1	37.1222
111	19185.4	37.0783
110	17949.3	37.0344
109	15929.2	36.9905
108	14271	36.9466
107	13607.7	36.9027
106	12974.5	36.8588
105	13537.3	36.8149
104	13889.1	36.7711
103	13587.6	36.7272
102	13989.6	36.6833
101	13818.7	36.6394
100	13607.7	36.5955
99	12652.9	36.5516
98	12632.8	36.5077
97	11879.1	36.4638
96	11457	36.4199
95	11607.7	36.376
94	11859	36.3321
93	11527.3	36.2883
92	11808.7	36.2444
91	11577.6	36.2005
90	11808.7	36.1566
89	12361.5	36.1127
88	12401.7	36.0688
87	13034.8	36.0249
86	12421.8	35.981
85	12321.3	35.9371
84	12160.5	35.8932
83	11426.8	35.8493
82	11286.1	35.8055
81	11919.3	35.7616
80	12853.9	35.7177
79	12642.9	35.6738
78	12110.2	35.6299
77	12049.9	35.586
76	12351.4	35.5421
75	13095.1	35.4982
74	13909.2	35.4543
73	15155.4	35.4104
72	16220.7	35.3665
71	17014.6	35.3227
70	17175.4	35.2788
69	18672.9	35.2349
68	20451.7	35.191
67	22220.5	35.1471
66	23587.3	35.1032
65	19356.3	35.0593
64	13286.1	35.0154
63	9477.15	34.9715
62	8984.7	34.9276
61	9557.55	34.8837
60	9738.45	34.8399
59	8632.95	34.796
58	6582.75	34.7521
57	5246.1	34.7082
56	4311.45	34.6643
55	3738.6	34.6204
54	3527.55	34.5765
53	3557.7	34.5326
52	3135.6	34.4887
51	3356.7	34.4448
50	3165.75	34.4009
49	3276.3	34.3571
48	3427.05	34.3132
47	3688.35	34.2693
46	3738.6	34.2254
45	3417	34.1815
44	3527.55	34.1376
43	3226.05	34.0937
42	3216	34.0498
41	3306.45	34.0059
40	3226.05	33.962
39	3065.25	33.9181
38	3125.55	33.8743
37	3246.15	33.8304
36	2824.05	33.7865
35	3025.05	33.7426
34	3085.35	33.6987
33	3316.5	33.6548
32	3095.4	33.6109
31	3316.5	33.567
30	3437.1	33.5231
29	3618	33.4792
28	3537.6	33.4353
27	3618	33.3915
26	3999.9	33.3476
25	4482.3	33.3037
24	5427	33.2598
23	5919.45	33.2159
22	5979.75	33.172
21	5135.55	33.1281
20	4009.95	33.0842
19	3236.1	33.0403
18	2452.2	32.9964
17	2140.65	32.9525
16	1889.4	32.9087
15	1859.25	32.8648
14	1979.85	32.8209
13	2190.9	32.777
12	2582.85	32.7331
11	2844.15	32.6892
10	3819	32.6453
9	4361.7	32.6014
8	4180.8	32.5575
7	4341.6	32.5136
6	4301.4	32.4697
5	4834.05	32.4259
4	5718.45	32.382
3	6231	32.3381
2	7447.05	32.2942
1	7055.1	32.2503
0	4401.9	32.2064
-1	1517.55	32.1625
-2	391.95	32.1186
-3	140.7	32.0747
-4	100.5	32.0308
-5	40.2	31.9869

## Sheet: CV-Three Electrode System
CC/Co-MOF												CC/CoNi-MOF@NH-1												CC/CoNi-MOF@NH-2												CC/CoNi-MOF@NH-3												CC/CoNNi-MOF@NH-4
2 mV/s		4 mV/s			6 mV/s	8 mV/s		10 mV/s				2 mV/s		4 mV/s			6 mV/s	8 mV/s		10 mV/s				2 mV/s		4 mV/s			6 mV/s	8 mV/s		10 mV/s				2 mV/s		4 mV/s			6 mV/s	8 mV/s		10 mV/s				2 mV/s
0.50021	2.02874	0.50007	3.20717	0.50007	4.32897	0.50021	5.3745	0.49979	6.39926			0.32675	-1.25846	0.32668	-2.57716	0.32671	-3.87361	0.32671	-5.10262	0.32666	-6.33253			0.50089	3.6881	0.50048	6.75014	0.50048	13.0023	0.50007	38.4889	0.49993	84.4977			0.50034	2.03756	0.50021	4.12635	0.50007	17.5783	0.49993	51.5709	0.50007	69.2943			0.14314	-1.77816
0.49757	0.51998	0.49755	0.97468	0.49739	1.6075	0.49754	2.52208	0.49748	3.39102			0.32414	-1.3169	0.32422	-2.6752	0.32423	-4.00154	0.32419	-5.25751	0.32419	-6.5097			0.49748	0.97412	0.49751	3.10676	0.49753	8.35135	0.49746	31.1569	0.49746	75.9204			0.49753	0.39349	0.49753	1.7459	0.49752	12.8811	0.4975	46.7597	0.49756	65.7179			0.14062	-1.66661
0.49295	-0.11983	0.49294	-0.61978	0.49264	-0.78713	0.49282	-0.57737	0.49291	-0.12896			0.31958	-1.42707	0.31956	-2.86556	0.3196	-4.25664	0.31957	-5.56447	0.3196	-6.86486			0.49289	-0.84946	0.49275	-0.73221	0.49276	2.45915	0.49289	20.5921	0.49287	61.6721			0.49291	-0.51156	0.49293	-0.45633	0.49291	6.89583	0.49295	38.617	0.4929	59.7355			0.13601	-1.48889
0.48834	-0.28864	0.48829	-1.06301	0.48804	-1.64544	0.48802	-1.98304	0.48831	-1.97989			0.31493	-1.56614	0.31495	-3.10177	0.31497	-4.5698	0.31498	-5.93614	0.31494	-7.28628			0.48823	-1.33256	0.48799	-2.4174	0.48802	-0.97222	0.48829	12.8347	0.4883	49.3606			0.48832	-0.71118	0.48835	-1.33191	0.48817	3.06874	0.48832	31.1578	0.4883	54.1352			0.13138	-1.34672
0.48369	-0.39793	0.4837	-1.26462	0.4834	-2.03937	0.48336	-2.65784	0.48365	-3.01314			0.31025	-1.7305	0.31033	-3.3761	0.31031	-4.92986	0.31026	-6.35992	0.31033	-7.76682			0.48363	-1.57129	0.48339	-3.24267	0.48339	-3.01061	0.48366	7.04938	0.48363	38.7147			0.48369	-0.81009	0.48366	-1.75065	0.48321	0.61497	0.48369	24.2943	0.48368	48.6615			0.12678	-1.22971
0.47913	-0.47595	0.47911	-1.38222	0.47875	-2.24495	0.47879	-3.01689	0.47903	-3.60111			0.30562	-1.93704	0.3057	-3.70182	0.30571	-5.34935	0.30567	-6.8429	0.30568	-8.30851			0.47901	-1.72926	0.47875	-3.71871	0.47877	-4.32023	0.47888	2.62038	0.47901	29.6108			0.47909	-0.88248	0.47909	-1.97919	0.47848	-0.86752	0.47906	18.1695	0.47907	43.2813			0.12217	-1.13145
0.47447	-0.53654	0.47451	-1.46208	0.47418	-2.36541	0.47415	-3.21745	0.47443	-3.94448			0.30105	-2.20172	0.30108	-4.10491	0.30112	-5.8501	0.3011	-7.41689	0.30108	-8.94011			0.47442	-1.85365	0.47412	-4.03415	0.47411	-5.21049	0.47412	-0.63926	0.47444	21.8977			0.47447	-0.93728	0.47448	-2.13425	0.47382	-1.79499	0.47445	12.9223	0.47446	37.9903			0.11755	-1.04855
0.46986	-0.58517	0.46988	-1.52153	0.46953	-2.44107	0.46952	-3.33488	0.46976	-4.14986			0.29643	-2.54516	0.29649	-4.60263	0.29647	-6.45169	0.29647	-8.09094	0.2965	-9.67379			0.46974	-1.95923	0.46953	-4.26364	0.46951	-5.83982	0.46953	-2.97561	0.46971	15.4275			0.4698	-0.98912	0.46984	-2.25168	0.46921	-2.42651	0.46982	8.61513	0.46981	32.8179			0.11291	-0.97706
0.46522	-0.61755	0.46519	-1.55398	0.4649	-2.47932	0.46489	-3.39449	0.46517	-4.25501			0.29179	-2.99629	0.29185	-5.21864	0.29185	-7.1706	0.29185	-8.87884	0.29171	-10.557			0.46512	-2.03847	0.46487	-4.4302	0.46489	-6.28796	0.46486	-4.71581	0.46515	10.0665			0.46519	-1.02618	0.46521	-2.33823	0.46458	-2.86083	0.465	5.12096	0.46517	27.86			0.1083	-0.91423
0.46058	-0.64367	0.46064	-1.57106	0.46029	-2.4951	0.46028	-3.41473	0.46053	-4.30036			0.28718	-3.62483	0.28724	-6.0191	0.28723	-8.06829	0.28722	-9.84201	0.28693	-11.6			0.46052	-2.1039	0.46026	-4.56418	0.46028	-6.62128	0.4602	-6.0269	0.46039	5.52099			0.46054	-1.0613	0.46057	-2.40805	0.45996	-3.17976	0.46024	2.44196	0.46058	23.1771			0.1037	-0.85994
0.45601	-0.66172	0.45603	-1.58035	0.45566	-2.4966	0.45566	-3.4132	0.45595	-4.30842			0.28258	-4.47671	0.2826	-7.03245	0.28266	-9.16903	0.28261	-10.9812	0.28232	-12.796			0.45588	-2.1614	0.45566	-4.67278	0.45566	-6.88147	0.45563	-7.02163	0.45562	1.80108			0.45597	-1.09446	0.45601	-2.47531	0.45536	-3.41992	0.4555	0.42497	0.45597	18.8213			0.09908	-0.81129
0.45138	-0.66741	0.45137	-1.57162	0.45109	-2.47299	0.4511	-3.37986	0.45132	-4.27388			0.27797	-5.57376	0.27799	-8.29185	0.27799	-10.4962	0.27799	-12.345	0.2777	-14.1959			0.4513	-2.19976	0.45106	-4.74504	0.45107	-7.06749	0.45106	-7.76842	0.45104	-1.07671			0.4514	-1.1194	0.45135	-2.52484	0.45081	-3.59648	0.45073	-1.06715	0.45137	14.8536			0.09442	-0.76739
0.44676	-0.6764	0.4468	-1.56164	0.44647	-2.44941	0.44643	-3.34362	0.44672	-4.22793			0.27334	-6.88361	0.27334	-9.78866	0.27332	-12.0633	0.27336	-13.9389	0.2731	-15.815			0.44667	-2.24175	0.44643	-4.82239	0.44644	-7.23661	0.44645	-8.36301	0.44642	-3.41896			0.44676	-1.15088	0.44675	-2.58098	0.44614	-3.75253	0.44615	-2.16152	0.44672	11.2922			0.08985	-0.72907
0.44213	-0.67454	0.44216	-1.53946	0.44186	-2.41015	0.44182	-3.28508	0.44213	-4.15977			0.26867	-8.30268	0.26876	-11.4519	0.26873	-13.8136	0.2687	-15.7175	0.2684	-17.611			0.44207	-2.27376	0.44182	-4.88417	0.44179	-7.36641	0.4418	-8.82298	0.44179	-5.3015			0.44213	-1.17683	0.44213	-2.63275	0.44158	-3.88139	0.44153	-2.99205	0.4421	8.16841			0.08525	-0.69347
0.43755	-0.66873	0.43755	-1.50981	0.43721	-2.35938	0.43726	-3.2141	0.43751	-4.06999			0.26407	-9.74366	0.26411	-13.2275	0.26414	-15.7069	0.26408	-17.66	0.26378	-19.5792			0.43744	-2.29791	0.43724	-4.93289	0.4372	-7.47159	0.43716	-9.18639	0.4372	-6.82068			0.43754	-1.20347	0.43751	-2.68138	0.4369	-3.99218	0.43689	-3.62865	0.43736	5.38664			0.08062	-0.6614
0.43295	-0.65826	0.43293	-1.47552	0.4326	-2.30149	0.43264	-3.13559	0.43287	-3.97069			0.2595	-11.1401	0.25954	-15.043	0.25951	-17.6865	0.25954	-19.7252	0.25921	-21.6781			0.4328	-2.32434	0.4326	-4.9792	0.43256	-7.56517	0.43256	-9.47984	0.43249	-8.05367			0.4329	-1.23319	0.43288	-2.73288	0.43225	-4.0967	0.43225	-4.14121	0.43259	3.01541			0.07597	-0.63257
0.42827	-0.63996	0.4283	-1.42947	0.42796	-2.23067	0.42794	-3.04055	0.42824	-3.85679			0.25487	-12.4217	0.25491	-16.8265	0.2549	-19.6873	0.2549	-21.8371	0.2546	-23.8491			0.42816	-2.33783	0.42793	-5.00771	0.42792	-7.62853	0.42793	-9.70537	0.42793	-9.03786			0.42826	-1.25499	0.42823	-2.77886	0.42765	-4.1873	0.42764	-4.54257	0.42778	1.04404			0.07133	-0.60577
0.4237	-0.62251	0.42368	-1.38277	0.42338	-2.15241	0.42337	-2.93504	0.42363	-3.72513			0.25028	-13.5641	0.2503	-18.5566	0.25031	-21.6774	0.25027	-23.9775	0.25	-26.0709			0.42358	-2.3481	0.42332	-5.02658	0.42334	-7.67823	0.42333	-9.87553	0.4233	-9.82211			0.4236	-1.27861	0.42365	-2.82098	0.42306	-4.2688	0.42304	-4.86158	0.42286	-0.64529			0.06668	-0.58102
0.41906	-0.60383	0.41904	-1.33218	0.41876	-2.0742	0.41873	-2.82825	0.419	-3.5909			0.24563	-14.5363	0.24566	-20.2006	0.24569	-23.625	0.24569	-26.1045	0.24539	-28.2979			0.41898	-2.36232	0.41868	-5.04627	0.41874	-7.71831	0.41872	-10.0178	0.41852	-10.4808			0.41901	-1.30381	0.41902	-2.86483	0.41841	-4.34712	0.41842	-5.13001	0.41812	-1.97402			0.0621	-0.5579
0.41443	-0.58105	0.41443	-1.28042	0.41414	-1.99208	0.41414	-2.71706	0.41441	-3.45246			0.24102	-15.2804	0.24105	-21.7216	0.24105	-25.4934	0.24105	-28.1835	0.24079	-30.5017			0.41434	-2.37356	0.4141	-5.06128	0.41411	-7.74705	0.41408	-10.1289	0.41372	-10.9908			0.41445	-1.32893	0.41442	-2.9085	0.41381	-4.42285	0.41379	-5.35468	0.41351	-3.03585			0.05748	-0.53702
0.40985	-0.5607	0.40985	-1.22893	0.40952	-1.91368	0.40952	-2.60786	0.40979	-3.31039			0.23641	-15.7594	0.23646	-23.1049	0.23646	-27.2786	0.23641	-30.2094	0.23615	-32.6674			0.40967	-2.38272	0.4095	-5.0753	0.40951	-7.77114	0.40946	-10.2167	0.40914	-11.3996			0.40982	-1.35387	0.40981	-2.95144	0.40921	-4.49714	0.40919	-5.5502	0.40892	-3.91666			0.05285	-0.51745
0.40521	-0.54094	0.4052	-1.18418	0.40489	-1.84022	0.40491	-2.50525	0.40516	-3.18111			0.23172	-15.9028	0.23177	-24.3077	0.23176	-28.9479	0.23177	-32.1502	0.23146	-34.7744			0.40511	-2.40242	0.40484	-5.10243	0.40485	-7.81137	0.40485	-10.3059	0.40452	-11.7514			0.40519	-1.38645	0.40519	-3.00673	0.40456	-4.57891	0.4046	-5.73363	0.4043	-4.65628			0.04827	-0.4993
0.40061	-0.51956	0.40059	-1.13647	0.40027	-1.76585	0.40024	-2.40632	0.40056	-3.05189			0.22712	-15.6443	0.22718	-25.269	0.22718	-30.4498	0.22719	-33.9675	0.22685	-36.7812			0.40045	-2.41978	0.40026	-5.12708	0.40027	-7.8462	0.40026	-10.3844	0.39991	-12.0426			0.40059	-1.4147	0.40056	-3.05976	0.39996	-4.65989	0.39994	-5.90039	0.39968	-5.2794			0.04362	-0.4824
0.39599	-0.50148	0.39596	-1.09298	0.39566	-1.69681	0.3957	-2.30829	0.39592	-2.93			0.22249	-14.9871	0.22256	-25.9623	0.22255	-31.7779	0.22252	-35.6586	0.22225	-38.6877			0.39588	-2.44009	0.39562	-5.15703	0.39565	-7.88634	0.39562	-10.4637	0.39532	-12.2957			0.39601	-1.44537	0.39594	-3.11511	0.39536	-4.74296	0.39532	-6.06055	0.39504	-5.81598			0.03902	-0.46701
0.39136	-0.48584	0.39135	-1.05892	0.39099	-1.64039	0.39101	-2.23143	0.39123	-2.82605			0.21793	-13.9936	0.21793	-26.3414	0.21795	-32.8998	0.21794	-37.2014	0.21765	-40.475			0.39121	-2.47438	0.39094	-5.2107	0.391	-7.95568	0.39099	-10.5674	0.39064	-12.5455			0.39129	-1.48715	0.39129	-3.18448	0.39065	-4.84178	0.3907	-6.22584	0.3904	-6.28691			0.03424	-0.45219
0.38675	-0.46483	0.38674	-1.01299	0.38639	-1.57197	0.38635	-2.13748	0.38664	-2.70851			0.21327	-12.745	0.21332	-26.331	0.21334	-33.7679	0.21332	-38.5543	0.21304	-42.1122			0.38661	-2.48558	0.38631	-5.23306	0.38635	-7.99319	0.38637	-10.6353	0.38601	-12.7396			0.38667	-1.51291	0.38667	-3.23586	0.38608	-4.9252	0.38608	-6.36573	0.38577	-6.68889			0.02948	-0.43862
0.3821	-0.44822	0.38208	-0.97703	0.38175	-1.51439	0.38174	-2.05621	0.38201	-2.60406			0.20864	-11.376	0.20871	-25.927	0.20865	-34.3681	0.20872	-39.7249	0.20841	-43.6126			0.38195	-2.50718	0.38173	-5.26375	0.38171	-8.03663	0.38176	-10.697	0.38144	-12.9161			0.38204	-1.54556	0.38204	-3.29371	0.38147	-5.01206	0.38145	-6.50589	0.38114	-7.04522			0.02483	-0.42549
0.37749	-0.43345	0.37747	-0.94441	0.37715	-1.46257	0.37718	-1.98689	0.37741	-2.51275			0.20406	-9.94038	0.20409	-25.0947	0.20408	-34.6327	0.20408	-40.6572	0.20378	-44.9278			0.37736	-2.53404	0.37717	-5.30692	0.37712	-8.09738	0.37711	-10.7849	0.37678	-13.0943			0.37745	-1.58266	0.37746	-3.35903	0.37683	-5.10639	0.37682	-6.65082	0.37651	-7.37391			0.02024	-0.41355
0.37289	-0.41786	0.37287	-0.91143	0.37254	-1.41203	0.37252	-1.91574	0.37281	-2.42247			0.19942	-8.49007	0.19949	-23.8532	0.1995	-34.5224	0.1995	-41.3209	0.19916	-46.0394			0.37274	-2.55489	0.37249	-5.34609	0.37253	-8.14971	0.37246	-10.8645	0.37218	-13.2446			0.37284	-1.61819	0.37285	-3.42317	0.37219	-5.19915	0.37222	-6.78833	0.37192	-7.66609			0.01565	-0.40258
0.36826	-0.40709	0.36825	-0.88818	0.36795	-1.37524	0.36795	-1.86322	0.36818	-2.35516			0.19475	-7.02889	0.1948	-22.2142	0.19482	-34.0023	0.19483	-41.6781	0.19453	-46.9223			0.36812	-2.59701	0.3679	-5.40833	0.36788	-8.23019	0.36786	-10.97	0.36757	-13.4171			0.3682	-1.66682	0.3682	-3.50294	0.36759	-5.31157	0.36757	-6.94335	0.36731	-7.95798			0.01101	-0.39211
0.36365	-0.39572	0.36363	-0.86353	0.36333	-1.33786	0.3633	-1.81344	0.36357	-2.28895			0.19016	-5.54689	0.19017	-20.1619	0.1902	-33.026	0.19024	-41.669	0.18993	-47.5124			0.36353	-2.64043	0.36325	-5.47615	0.3633	-8.32141	0.36328	-11.0868	0.36289	-13.595			0.36359	-1.71778	0.36363	-3.59228	0.363	-5.43321	0.363	-7.10571	0.36266	-8.23798			0.00641	-0.38234
0.35903	-0.38526	0.359	-0.84187	0.35869	-1.30361	0.35869	-1.7659	0.35897	-2.22895			0.18559	-4.16148	0.1856	-17.658	0.18563	-31.5637	0.18557	-41.2525	0.18527	-47.7856			0.35891	-2.68983	0.35864	-5.55683	0.35867	-8.42529	0.35868	-11.2175	0.35833	-13.7817			0.35899	-1.77393	0.35898	-3.69008	0.35838	-5.56787	0.35839	-7.28085	0.35806	-8.51567			0.00208	-0.37361
0.35439	-0.37666	0.35437	-0.82452	0.35402	-1.27659	0.35407	-1.72913	0.35432	-2.18205			0.18092	-3.06461	0.18099	-14.6204	0.18098	-29.5628	0.181	-40.3894	0.1807	-47.6969			0.35427	-2.75053	0.35404	-5.6548	0.35403	-8.55769	0.35403	-11.3778	0.35371	-13.9949			0.35436	-1.84173	0.35436	-3.80376	0.35372	-5.72155	0.35374	-7.47384	0.35345	-8.8028			-3.9185e-05	-0.36954
0.34976	-0.36689	0.34973	-0.80399	0.34946	-1.2474	0.34942	-1.69029	0.34967	-2.13257			0.17634	-2.31976	0.17639	-11.1185	0.17638	-26.8937	0.17638	-39.0089	0.17607	-47.191			0.34967	-2.81548	0.34937	-5.76842	0.34939	-8.70125	0.34938	-11.5512	0.34907	-14.2172			0.34968	-1.91415	0.34971	-3.92887	0.34911	-5.88806	0.3491	-7.67843	0.34878	-9.09229			0.00239	-0.35329
0.3451	-0.35905	0.34513	-0.78782	0.34483	-1.2209	0.34485	-1.6548	0.34507	-2.08776			0.17175	-1.83878	0.17178	-7.96326	0.17176	-23.3224	0.17177	-37.0242	0.17144	-46.221			0.34504	-2.89108	0.34479	-5.89265	0.34481	-8.86104	0.34477	-11.7434	0.34441	-14.4551			0.3451	-1.99478	0.34505	-4.06721	0.34451	-6.07104	0.34448	-7.90192	0.34417	-9.39085			0.007	-0.33132
0.34052	-0.35176	0.3405	-0.77276	0.34023	-1.19937	0.34019	-1.62536	0.34049	-2.0508			0.16712	-1.51812	0.16713	-5.90625	0.16718	-18.6017	0.16718	-34.2572	0.16684	-44.6993			0.34041	-2.98407	0.34014	-6.04425	0.34018	-9.05112	0.34016	-11.969	0.33982	-14.7244			0.34052	-2.08915	0.34049	-4.22469	0.3399	-6.27661	0.33986	-8.1494	0.33962	-9.70747			0.01161	-0.31325
0.33587	-0.34599	0.33592	-0.75946	0.33561	-1.17743	0.33564	-1.59793	0.33584	-2.01688			0.16248	-1.29222	0.16254	-4.68418	0.16254	-13.5645	0.16253	-30.3426	0.16223	-42.4737			0.33579	-3.09223	0.33557	-6.21913	0.33558	-9.27432	0.33553	-12.2269	0.33525	-15.0283			0.3359	-2.19849	0.33592	-4.40627	0.3353	-6.50811	0.33529	-8.42486	0.33497	-10.0479			0.01625	-0.29766
0.33131	-0.34072	0.33133	-0.74712	0.33098	-1.16034	0.33099	-1.5725	0.33128	-1.9838			0.15786	-1.1256	0.15792	-3.90186	0.1579	-10.0712	0.15791	-24.7884	0.15763	-39.2706			0.33124	-3.21149	0.33096	-6.41884	0.33095	-9.52816	0.33096	-12.5159	0.33062	-15.3672			0.33125	-2.31985	0.33129	-4.60592	0.33064	-6.76818	0.33069	-8.72577	0.33034	-10.4103			0.02086	-0.28371
0.32667	-0.33648	0.3267	-0.73943	0.32638	-1.14772	0.32637	-1.5556	0.32661	-1.96264			0.15322	-0.99685	0.15327	-3.34598	0.15324	-8.05383	0.15325	-18.4219	0.153	-34.5685			0.3266	-3.3713	0.32634	-6.6681	0.32628	-9.84075	0.32635	-12.8793	0.32597	-15.7707			0.32665	-2.47226	0.32665	-4.84859	0.32605	-7.07194	0.32605	-9.0732	0.32557	-10.8341			0.02544	-0.27096
0.32207	-0.33259	0.32205	-0.73108	0.32178	-1.13378	0.32177	-1.53753	0.32197	-1.94074			0.14862	-0.89508	0.14862	-2.92636	0.14863	-6.76664	0.14862	-13.9187	0.14836	-27.87			0.32195	-3.55023	0.3217	-6.95471	0.3217	-10.1993	0.32169	-13.2853	0.32137	-16.2252			0.32203	-2.64618	0.32205	-5.12055	0.32144	-7.40991	0.32142	-9.4562	0.32086	-11.2835			0.03	-0.25928
0.31745	-0.33042	0.31746	-0.72443	0.31716	-1.12431	0.31712	-1.52321	0.3174	-1.92215			0.14397	-0.81261	0.14406	-2.59838	0.14402	-5.85034	0.14403	-11.3204	0.14376	-21.0083			0.31728	-3.76684	0.31711	-7.29449	0.31709	-10.6154	0.31707	-13.762	0.31674	-16.7475			0.31743	-2.85059	0.31742	-5.43248	0.31683	-7.79427	0.31678	-9.88695	0.3162	-11.7748			0.03468	-0.24827
0.31279	-0.33017	0.31277	-0.72271	0.3125	-1.12143	0.31246	-1.52004	0.31267	-1.91485			0.1394	-0.74457	0.13938	-2.33453	0.13944	-5.15814	0.13941	-9.63522	0.13912	-16.6146			0.31272	-4.03981	0.31244	-7.71216	0.31247	-11.1233	0.31243	-14.3297	0.31211	-17.3698			0.31272	-3.10359	0.31274	-5.80352	0.31219	-8.24471	0.31213	-10.3849	0.31155	-12.3231			0.03928	-0.23785
0.30817	-0.32578	0.30816	-0.71312	0.30783	-1.10548	0.30783	-1.49878	0.30811	-1.8908			0.13479	-0.68799	0.13482	-2.11778	0.13477	-4.60665	0.13479	-8.41637	0.13451	-13.961			0.30806	-4.33242	0.30779	-8.15663	0.30779	-11.6639	0.30778	-14.9399	0.30747	-18.0319			0.30815	-3.38239	0.30811	-6.20629	0.30753	-8.72647	0.30755	-10.9093	0.30689	-12.9044			0.04394	-0.22806
0.30354	-0.32362	0.30355	-0.70832	0.30326	-1.09859	0.30323	-1.48695	0.30349	-1.87531			0.13015	-0.63976	0.13021	-1.93767	0.13017	-4.15995	0.13019	-7.47742	0.1299	-12.1302			0.30347	-4.68405	0.30316	-8.67801	0.30322	-12.2889	0.30314	-15.6344	0.30286	-18.781			0.30355	-3.71609	0.30353	-6.6682	0.30291	-9.26802	0.3029	-11.499	0.30229	-13.5421			0.04858	-0.21872
0.29896	-0.32289	0.29895	-0.70524	0.29862	-1.09274	0.29864	-1.48015	0.2989	-1.86512			0.12552	-0.59821	0.12556	-1.78378	0.12556	-3.78521	0.12559	-6.72148	0.12528	-10.7398			0.29885	-5.10597	0.29858	-9.27983	0.2986	-12.9994	0.29859	-16.418	0.29827	-19.6277			0.29893	-4.11871	0.29894	-7.20192	0.29832	-9.88019	0.29831	-12.1563	0.29771	-14.2434			0.0532	-0.20973
0.29434	-0.32121	0.29433	-0.70036	0.29404	-1.08446	0.29402	-1.46704	0.29427	-1.85027			0.12094	-0.56199	0.12097	-1.65205	0.12096	-3.47049	0.12095	-6.1005	0.12062	-9.63414			0.29421	-5.59951	0.29398	-9.95788	0.29403	-13.7892	0.29396	-17.282	0.29365	-20.5529			0.2943	-4.5969	0.29433	-7.80502	0.29371	-10.5579	0.29372	-12.873	0.29308	-15.0014			0.0578	-0.20118
0.28972	-0.32228	0.28971	-0.70176	0.28939	-1.08463	0.28941	-1.46638	0.28964	-1.84809			0.11625	-0.53003	0.1163	-1.5387	0.11631	-3.19848	0.11629	-5.57322	0.11602	-8.73105			0.28959	-6.19982	0.28938	-10.7554	0.28938	-14.6974	0.28938	-18.267	0.28903	-21.5936			0.28969	-5.18048	0.28968	-8.50826	0.28907	-11.3278	0.28908	-13.6798	0.2885	-15.8462			0.06238	-0.1926
0.28511	-0.32191	0.28508	-0.7	0.28476	-1.08332	0.28476	-1.46376	0.28502	-1.84272			0.11165	-0.5014	0.11172	-1.43879	0.11165	-2.96204	0.1117	-5.12652	0.11139	-7.97502			0.28498	-6.93222	0.28474	-11.6795	0.28476	-15.7303	0.28474	-19.3686	0.28442	-22.751			0.28507	-5.89783	0.28503	-9.31676	0.28446	-12.1975	0.28446	-14.5717	0.28386	-16.7688			0.067	-0.18418
0.28049	-0.32286	0.28047	-0.70173	0.28018	-1.08376	0.28016	-1.46335	0.28043	-1.84121			0.10702	-0.47626	0.10708	-1.34952	0.10708	-2.75425	0.10705	-4.73743	0.10675	-7.33121			0.2804	-7.84363	0.28015	-12.7594	0.28019	-16.9002	0.28014	-20.6024	0.27982	-24.033			0.28045	-6.80008	0.28043	-10.2504	0.27983	-13.1713	0.27988	-15.5604	0.27923	-17.779			0.07163	-0.17583
0.27585	-0.32487	0.27584	-0.70466	0.27554	-1.08733	0.27553	-1.46773	0.27581	-1.84442			0.10225	-0.45313	0.10247	-1.27114	0.10252	-2.57282	0.10233	-4.3886	0.10218	-6.77414			0.27577	-9.01736	0.27553	-14.0456	0.2755	-18.2562	0.27548	-22.0025	0.27519	-25.4711			0.27582	-7.94921	0.27581	-11.3453	0.27522	-14.2757	0.27521	-16.6598	0.27462	-18.8934			0.07626	-0.1674
0.27122	-0.3254	0.27123	-0.70524	0.27088	-1.08778	0.27086	-1.46816	0.27117	-1.84673			0.09754	-0.43219	0.09787	-1.20086	0.09784	-2.41382	0.09754	-4.081	0.09755	-6.28858			0.27112	-10.5587	0.2709	-15.5921	0.27086	-19.8227	0.27083	-23.5908	0.27053	-27.0762			0.27117	-9.33169	0.27119	-12.6247	0.27059	-15.5244	0.27055	-17.8767	0.26996	-20.1088			0.08091	-0.15896
0.26661	-0.32665	0.26661	-0.70766	0.26631	-1.09028	0.26625	-1.46997	0.26656	-1.8496			0.09289	-0.41384	0.09324	-1.13795	0.09326	-2.27306	0.09294	-3.816	0.09293	-5.86827			0.26652	-12.4902	0.26626	-17.4433	0.26629	-21.6303	0.26625	-25.3812	0.26587	-28.8687			0.26657	-10.859	0.26657	-14.0861	0.26597	-16.9235	0.26599	-19.2225	0.26533	-21.4325			0.08552	-0.15033
0.262	-0.32988	0.26197	-0.71203	0.26168	-1.09741	0.26167	-1.47712	0.26193	-1.85616			0.08828	-0.39713	0.08863	-1.08064	0.08861	-2.14578	0.08834	-3.58357	0.0883	-5.49898			0.2619	-14.6973	0.26169	-19.6344	0.26166	-23.725	0.26166	-27.4227	0.26129	-30.8772			0.26196	-12.4556	0.26195	-15.7032	0.26135	-18.475	0.26134	-20.7078	0.26077	-22.8854			0.09016	-0.14151
0.25737	-0.33166	0.2574	-0.71677	0.25706	-1.10216	0.25706	-1.48504	0.25731	-1.86601			0.08366	-0.3817	0.08404	-1.03072	0.08402	-2.02944	0.08371	-3.37697	0.0837	-5.16265			0.25726	-17.0289	0.25703	-22.1005	0.25704	-26.0959	0.25699	-29.7146	0.25669	-33.1122			0.25735	-14.0648	0.25735	-17.4279	0.25677	-20.1629	0.25678	-22.3297	0.25615	-24.4598			0.09475	-0.13236
0.25277	-0.33488	0.25277	-0.72146	0.25247	-1.10915	0.25244	-1.49279	0.25273	-1.87255			0.07904	-0.36758	0.07937	-0.98561	0.07939	-1.92571	0.07905	-3.18955	0.07909	-4.86054			0.25267	-19.3792	0.25242	-24.7252	0.25244	-28.6893	0.25243	-32.2203	0.25212	-35.5538			0.25278	-15.6396	0.25276	-19.2005	0.25213	-21.9436	0.25214	-24.0592	0.25155	-26.1481			0.0994	-0.12294
0.24814	-0.34067	0.24817	-0.73208	0.24783	-1.12441	0.24782	-1.51159	0.2481	-1.89395			0.0744	-0.35452	0.07472	-0.9421	0.07469	-1.8324	0.07438	-3.02204	0.07442	-4.5856			0.24805	-21.7222	0.2478	-27.4637	0.24783	-31.4811	0.24775	-34.9629	0.24746	-38.2291			0.24813	-17.1809	0.24814	-21.0108	0.24754	-23.8082	0.24751	-25.8992	0.24693	-27.9533			0.10398	-0.113
0.24352	-0.34551	0.24349	-0.74118	0.24322	-1.13645	0.24321	-1.52751	0.24348	-1.91512			0.06975	-0.34241	0.07011	-0.90082	0.07013	-1.74671	0.06981	-2.86769	0.06962	-4.33087			0.24345	-23.9986	0.24317	-30.2129	0.24322	-34.3675	0.24319	-37.8509	0.24288	-41.0686			0.24349	-18.6542	0.24352	-22.8128	0.24288	-25.7004	0.24289	-27.8043	0.24229	-29.8363			0.10859	-0.10263
0.23892	-0.35123	0.23891	-0.75213	0.23857	-1.15253	0.23863	-1.54846	0.23884	-1.93854			0.06518	-0.3312	0.06549	-0.86469	0.0655	-1.66834	0.06521	-2.72556	0.06488	-4.09548			0.23887	-26.1991	0.23855	-32.9403	0.23862	-37.2962	0.23858	-40.8414	0.23824	-44.0446			0.23888	-20.0422	0.23891	-24.5931	0.23829	-27.6073	0.23832	-29.7528	0.23769	-31.7851			0.11324	-0.09166
0.23429	-0.35998	0.23426	-0.76914	0.23395	-1.17677	0.23395	-1.57882	0.23423	-1.97602			0.06056	-0.32067	0.0609	-0.83177	0.06088	-1.59595	0.06057	-2.59827	0.0603	-3.89436			0.23417	-28.3342	0.23388	-35.6675	0.23394	-40.2463	0.23387	-43.9024	0.23359	-47.1334			0.23425	-21.3303	0.23422	-26.3481	0.23358	-29.5226	0.23364	-31.7365	0.23303	-33.7917			0.11787	-0.07978
0.22963	-0.36575	0.22963	-0.77795	0.22933	-1.19095	0.22928	-1.59625	0.22957	-1.99821			0.05593	-0.31081	0.05628	-0.80118	0.05627	-1.52943	0.05599	-2.47846	0.05566	-3.70877			0.22957	-30.3282	0.22927	-38.3279	0.22933	-43.1561	0.22927	-46.9375	0.22894	-50.2244			0.22965	-22.4661	0.22961	-28.0369	0.229	-31.3948	0.22899	-33.7007	0.22841	-35.7972			0.12247	-0.06703
0.22502	-0.37307	0.225	-0.79342	0.22469	-1.21238	0.22465	-1.62296	0.22497	-2.03053			0.05133	-0.30158	0.05167	-0.77252	0.05165	-1.46917	0.05138	-2.37118	0.05104	-3.53738			0.22491	-32.1541	0.22468	-40.9235	0.22471	-46.047	0.22468	-49.9707	0.22435	-53.3319			0.22501	-23.4247	0.22501	-29.6548	0.22436	-33.2291	0.2244	-35.6501	0.22376	-37.8041			0.12708	-0.05318
0.22041	-0.38354	0.2204	-0.81114	0.22008	-1.23809	0.22011	-1.65597	0.22034	-2.06766			0.0467	-0.2928	0.04704	-0.74555	0.04702	-1.41264	0.04672	-2.2713	0.0464	-3.38038			0.2203	-33.7864	0.22004	-43.4496	0.2201	-48.9011	0.22005	-52.998	0.21973	-56.4525			0.2204	-24.1717	0.22041	-31.1972	0.2198	-35.0247	0.21979	-37.5738	0.21918	-39.8045			0.13265	-0.03281
0.2158	-0.39186	0.21577	-0.82714	0.2155	-1.26079	0.21547	-1.68747	0.21576	-2.10612			0.04203	-0.28439	0.04242	-0.72048	0.04244	-1.3601	0.04212	-2.17933	0.0418	-3.23462			0.2157	-35.1349	0.21548	-45.8635	0.21548	-51.6989	0.21544	-55.9905	0.21517	-59.552			0.21576	-24.6471	0.21581	-32.6356	0.21516	-36.7539	0.21518	-39.4619	0.21457	-41.7722			0.13814	-0.01573
0.21118	-0.40534	0.2112	-0.85183	0.21085	-1.29694	0.21086	-1.73018	0.21113	-2.158			0.03741	-0.2765	0.03778	-0.69768	0.03777	-1.31186	0.03747	-2.09596	0.03719	-3.10107			0.21111	-36.1511	0.21083	-48.1455	0.21086	-54.4242	0.21081	-58.9384	0.21054	-62.6315			0.21116	-24.8065	0.21114	-33.9694	0.21055	-38.4273	0.21053	-41.3104	0.20996	-43.7247			0.14284	0.00568
0.20655	-0.41789	0.20654	-0.87583	0.20624	-1.33178	0.20622	-1.7764	0.20651	-2.21388			0.03279	-0.26901	0.03314	-0.6755	0.03315	-1.26645	0.03281	-2.01545	0.03255	-2.977			0.20649	-36.7956	0.20621	-50.2561	0.20623	-57.0403	0.20621	-61.8212	0.20589	-65.6565			0.20654	-24.5929	0.20656	-35.1797	0.20593	-40.0275	0.20593	-43.1146	0.20536	-45.6424			0.14817	0.03369
0.20195	-0.43193	0.20195	-0.90338	0.20167	-1.37077	0.20165	-1.82718	0.20189	-2.27288			0.02822	-0.2617	0.02856	-0.65485	0.0285	-1.22422	0.02821	-1.94193	0.02794	-2.86255			0.20185	-37.0265	0.20159	-52.1849	0.20162	-59.5304	0.20158	-64.5944	0.20129	-68.5894			0.2019	-23.9314	0.20194	-36.2362	0.20131	-41.5456	0.2013	-44.8604	0.20068	-47.521			0.15355	0.06289
0.19732	-0.44967	0.19734	-0.93551	0.19706	-1.41689	0.197	-1.88601	0.19728	-2.34452			0.02363	-0.25468	0.02394	-0.63561	0.02396	-1.18519	0.02361	-1.8725	0.02332	-2.75646			0.1972	-36.8085	0.197	-53.9368	0.19697	-61.9222	0.197	-67.2975	0.19666	-71.4727			0.19729	-22.7331	0.19728	-37.1185	0.19669	-42.9735	0.19672	-46.5479	0.19607	-49.3563			0.15818	0.09359
0.19269	-0.4659	0.19268	-0.96559	0.19237	-1.46332	0.19237	-1.9457	0.19262	-2.41934			0.01901	-0.24808	0.01934	-0.61747	0.01934	-1.14574	0.01902	-1.80782	0.01871	-2.65644			0.19261	-36.1369	0.19235	-55.4713	0.19239	-64.1992	0.19228	-69.9382	0.192	-74.3209			0.19268	-20.9034	0.19269	-37.7892	0.19206	-44.2935	0.19206	-48.1621	0.19147	-51.1384			0.1628	0.12905
0.18809	-0.48433	0.18808	-1.00147	0.18772	-1.51298	0.18776	-2.00961	0.188	-2.49492			0.01439	-0.24172	0.01471	-0.60027	0.01467	-1.11026	0.01441	-1.7486	0.01413	-2.56289			0.18799	-35.0283	0.18772	-56.7405	0.18772	-66.3287	0.18772	-72.481	0.18743	-77.0983			0.18802	-18.3745	0.18804	-38.2	0.18744	-45.4775	0.18745	-49.6917	0.18683	-52.8506			0.16744	0.17049
0.18343	-0.50493	0.18345	-1.04016	0.18315	-1.56855	0.18315	-2.08006	0.18338	-2.57952			0.00978	-0.23554	0.01007	-0.58433	0.01009	-1.07761	0.00978	-1.69224	0.00948	-2.47534			0.18338	-33.596	0.18314	-57.7213	0.18311	-68.2875	0.18314	-74.9201	0.1828	-79.803			0.18343	-15.2999	0.18343	-38.299	0.18285	-46.5149	0.18285	-51.1306	0.18223	-54.4992			0.17205	0.21921
0.17887	-0.52715	0.17886	-1.0831	0.17855	-1.62922	0.17852	-2.15893	0.17879	-2.67486			0.00511	-0.2295	0.00547	-0.56941	0.00553	-1.04533	0.00517	-1.63871	0.00487	-2.39053			0.17876	-31.9784	0.17848	-58.3906	0.17852	-70.0556	0.17848	-77.2312	0.17814	-82.4252			0.17881	-12.1541	0.17885	-38.0339	0.17823	-47.3809	0.17819	-52.464	0.1776	-56.0715			0.17667	0.27651
0.17424	-0.54981	0.17423	-1.1245	0.17392	-1.69177	0.17389	-2.23761	0.17421	-2.76683			0.00147	-0.22495	0.00161	-0.55736	0.00163	-1.0204	0.00146	-1.59802	0.00135	-2.32951			0.17413	-30.214	0.17389	-58.7185	0.17392	-71.5897	0.17391	-79.3696	0.17358	-84.9178			0.1742	-9.47224	0.17423	-37.3034	0.17361	-48.0378	0.17365	-53.6704	0.17301	-57.5577			0.18128	0.34486
0.16963	-0.57948	0.16962	-1.17942	0.16927	-1.7677	0.16931	-2.33381	0.16955	-2.88368			-9.84021e-07	-0.22303	-3.9185e-05	-0.55223	-9.84021e-07	-1.00934	3.7217e-05	-1.58025	-7.73861e-05	-2.30543			0.16953	-28.271	0.16926	-58.7313	0.16931	-72.9279	0.16926	-81.3675	0.16897	-87.3118			0.1696	-7.47614	0.16958	-36.0061	0.16899	-48.4715	0.16899	-54.7571	0.16838	-58.9624			0.18586	0.42641
0.165	-0.60682	0.16499	-1.23256	0.16469	-1.84428	0.16468	-2.43303	0.1649	-3.00123			0.00236	-0.21203	0.00243	-0.52806	0.00245	-0.96584	0.00239	-1.51347	0.00238	-2.20618			0.16488	-25.9057	0.16465	-58.3851	0.16467	-74.0287	0.16465	-83.1932	0.16432	-89.5687			0.16498	-6.0482	0.16499	-33.9368	0.16438	-48.6263	0.16439	-55.6906	0.16378	-60.265			0.1905	0.52411
0.16039	-0.63729	0.16038	-1.2907	0.16007	-1.92781	0.16006	-2.53919	0.16031	-3.12962			0.00695	-0.19749	0.007	-0.49457	0.00702	-0.90402	0.00704	-1.41729	0.007	-2.06371			0.16029	-22.8	0.16001	-57.6693	0.16004	-74.8715	0.16003	-84.8363	0.15972	-91.681			0.16035	-5.02569	0.16038	-30.8428	0.15976	-48.441	0.15976	-56.4482	0.15916	-61.4561			0.19511	0.64143
0.15577	-0.67105	0.15574	-1.35412	0.15543	-2.01773	0.15543	-2.65425	0.15569	-3.26768			0.01158	-0.1857	0.01161	-0.46709	0.01165	-0.85263	0.01163	-1.33705	0.01162	-1.94624			0.15565	-18.6707	0.15539	-56.5752	0.15541	-75.4402	0.15536	-86.2942	0.15508	-93.6519			0.15559	-4.25554	0.1557	-26.6385	0.15511	-47.8298	0.15512	-57.0035	0.15448	-62.5251			0.19975	0.78178
0.15112	-0.70522	0.15115	-1.41534	0.15082	-2.108	0.15077	-2.76814	0.15106	-3.40414			0.01621	-0.1753	0.01623	-0.44367	0.01625	-0.80776	0.01626	-1.2679	0.01624	-1.84342			0.15103	-13.7639	0.15076	-55.0792	0.15079	-75.6971	0.15073	-87.5251	0.15045	-95.4419			0.15077	-3.66587	0.15115	-21.9512	0.15048	-46.6316	0.15048	-57.3023	0.14986	-63.4308			0.20438	0.94788
0.14652	-0.7399	0.14653	-1.479	0.14617	-2.20124	0.14617	-2.88783	0.14647	-3.55025			0.02083	-0.16627	0.02088	-0.42195	0.02089	-0.76743	0.02083	-1.20625	0.02085	-1.75078			0.14646	-9.41123	0.14613	-53.18	0.14615	-75.6242	0.14613	-88.5133	0.14582	-97.0537			0.14613	-3.22613	0.14649	-17.8333	0.14587	-44.6165	0.14589	-57.2886	0.14523	-64.1561			0.20901	1.14477
0.14188	-0.77666	0.14187	-1.55035	0.14154	-2.30143	0.14158	-3.01557	0.1418	-3.70075			0.02543	-0.15792	0.02546	-0.4022	0.02549	-0.73118	0.02547	-1.14958	0.02551	-1.66723			0.14176	-6.64383	0.14156	-50.8091	0.14154	-75.2154	0.1415	-89.2415	0.14123	-98.4663			0.14157	-2.87512	0.14186	-14.6942	0.14125	-41.539	0.14124	-56.8647	0.14068	-64.6684			0.21365	1.37657
0.13728	-0.81064	0.13727	-1.61574	0.13699	-2.39534	0.13695	-3.13844	0.13722	-3.85006			0.03003	-0.15038	0.03005	-0.38401	0.03007	-0.69769	0.03007	-1.09762	0.03009	-1.5899			0.13719	-5.06393	0.13693	-47.7371	0.13692	-74.4411	0.13692	-89.6786	0.13658	-99.6491			0.13696	-2.58525	0.13726	-12.3601	0.13666	-37.2872	0.13664	-55.882	0.13607	-64.8935			0.2182	1.64304
0.13264	-0.85054	0.13261	-1.68942	0.13235	-2.4993	0.13235	-3.2703	0.13262	-4.00678			0.03467	-0.14342	0.03469	-0.36715	0.03468	-0.66663	0.03468	-1.04854	0.03467	-1.51847			0.13242	-4.08315	0.1323	-43.5425	0.13232	-73.2972	0.13234	-89.8363	0.13199	-100.607			0.13233	-2.34585	0.13264	-10.5889	0.13204	-32.2906	0.13202	-54.1905	0.13141	-64.7619			0.22282	1.95655
0.1281	-0.88764	0.12806	-1.76042	0.12772	-2.60494	0.12777	-3.4049	0.12801	-4.16913			0.03926	-0.13699	0.03933	-0.35149	0.03934	-0.63805	0.03932	-1.0026	0.03929	-1.45118			0.12765	-3.42261	0.12771	-37.623	0.12772	-71.746	0.12766	-89.7157	0.12738	-101.334			0.12771	-2.14468	0.128	-9.21856	0.12744	-27.4429	0.12742	-51.6145	0.12684	-64.1735			0.22741	2.31474
0.12345	-0.92261	0.1234	-1.83077	0.12312	-2.70515	0.12311	-3.53568	0.12338	-4.32882			0.04395	-0.13095	0.04396	-0.33649	0.04399	-0.61102	0.04393	-0.96068	0.04393	-1.38919			0.12303	-2.96927	0.12308	-29.4761	0.12305	-69.7096	0.12304	-89.2989	0.12276	-101.815			0.12309	-1.97354	0.12341	-8.12913	0.12278	-23.3645	0.12281	-48.0135	0.12217	-63.0139			0.23204	2.7252
0.11879	-0.95649	0.11882	-1.90026	0.11849	-2.80512	0.11849	-3.66523	0.11873	-4.48689			0.04855	-0.12511	0.04859	-0.32244	0.04857	-0.58571	0.04859	-0.92073	0.04858	-1.33083			0.11838	-2.62556	0.11847	-20.4823	0.11851	-67.0572	0.11845	-88.5608	0.11809	-102.063			0.11846	-1.82798	0.11879	-7.24764	0.11822	-20.0972	0.11819	-43.4562	0.11754	-61.1581			0.23667	3.19745
0.11418	-0.98745	0.11419	-1.96192	0.11386	-2.89693	0.11383	-3.78665	0.11411	-4.64034			0.05315	-0.11977	0.05319	-0.30928	0.0532	-0.56147	0.05319	-0.88268	0.05321	-1.27597			0.11377	-2.3541	0.11381	-14.3135	0.11381	-63.5197	0.11379	-87.4561	0.11349	-102.06			0.11384	-1.70104	0.11415	-6.51896	0.11351	-17.485	0.11355	-38.4283	0.1129	-58.4917			0.24136	3.71865
0.10957	-1.0119	0.10956	-2.01181	0.10923	-2.97436	0.10919	-3.88983	0.1095	-4.77			0.05777	-0.11463	0.05779	-0.29666	0.05782	-0.53869	0.05777	-0.84682	0.05784	-1.22444			0.10913	-2.13501	0.1092	-10.9072	0.10924	-58.6065	0.10919	-85.9076	0.10887	-101.765			0.10921	-1.58979	0.10951	-5.90748	0.10893	-15.3778	0.10889	-33.6598	0.10835	-54.9107			0.24596	4.29353
0.10491	-1.03178	0.10496	-2.05277	0.10464	-3.03801	0.10463	-3.98008	0.1049	-4.88568			0.06239	-0.10977	0.06243	-0.28471	0.06244	-0.51756	0.06243	-0.81168	0.06241	-1.17421			0.10454	-1.95346	0.10459	-8.82764	0.10464	-51.6611	0.10462	-83.8263	0.10429	-101.168			0.10465	-1.49173	0.10491	-5.39147	0.10433	-13.6553	0.10434	-29.5267	0.1037	-50.4714			0.25058	4.92022
0.10035	-1.04655	0.10035	-2.08651	0.09999	-3.09081	0.10002	-4.05419	0.10024	-4.98463			0.06695	-0.105	0.06702	-0.27292	0.06705	-0.49671	0.06702	-0.77885	0.06706	-1.12697			0.09993	-1.80126	0.1	-7.42477	0.10001	-41.9831	0.09998	-81.0701	0.09963	-100.227			0.09999	-1.40379	0.10028	-4.95544	0.09973	-12.2365	0.09971	-26.0438	0.09908	-45.5774			0.25518	5.58071
0.09574	-1.04651	0.09572	-2.09418	0.09544	-3.11212	0.09537	-4.09306	0.09565	-5.04519			0.07158	-0.10039	0.07162	-0.26192	0.07163	-0.47644	0.07163	-0.74739	0.07167	-1.08186			0.09535	-1.6697	0.09538	-6.41153	0.0954	-30.5699	0.09534	-77.3496	0.09503	-98.8568			0.09538	-1.32365	0.09567	-4.57059	0.09509	-11.0483	0.09506	-23.1101	0.09447	-40.8073			0.25979	6.26759
0.0911	-1.04658	0.09111	-2.09853	0.09083	-3.12607	0.0908	-4.12011	0.09103	-5.0897			0.07622	-0.09606	0.07626	-0.25102	0.07628	-0.45721	0.07629	-0.7166	0.07631	-1.03945			0.09074	-1.55665	0.09078	-5.65592	0.09076	-22.1444	0.09073	-72.2571	0.09041	-97.0153			0.09076	-1.25298	0.09109	-4.23489	0.09043	-10.0459	0.09046	-20.6299	0.08985	-36.5112			0.26441	6.97139
0.08652	-1.03077	0.08647	-2.07659	0.0862	-3.10366	0.08615	-4.10864	0.08641	-5.0913			0.08091	-0.09179	0.08092	-0.24049	0.08097	-0.43856	0.08093	-0.68771	0.08093	-0.9971			0.08609	-1.45699	0.08613	-5.05252	0.08616	-17.2746	0.08614	-65.1459	0.0858	-94.5479			0.08616	-1.18704	0.08649	-3.93698	0.08585	-9.18425	0.08587	-18.5245	0.08524	-32.7375			0.269	7.67472
0.08187	-1.00284	0.08185	-2.03337	0.08154	-3.0537	0.08155	-4.05969	0.08181	-5.05457			0.08551	-0.08734	0.08555	-0.23025	0.08556	-0.42058	0.08555	-0.65972	0.08554	-0.95682			0.08146	-1.36899	0.08135	-4.55362	0.08153	-14.1826	0.0815	-55.2878	0.08121	-91.2529			0.08154	-1.12595	0.08186	-3.6724	0.08123	-8.43269	0.08124	-16.733	0.08063	-29.4488			0.27364	8.37732
0.07723	-0.96484	0.0772	-1.97104	0.0769	-2.97588	0.07688	-3.97645	0.07716	-4.97126			0.09011	-0.08308	0.09014	-0.2203	0.09017	-0.40304	0.09016	-0.63321	0.09017	-0.91719			0.07683	-1.29077	0.07659	-4.14668	0.07686	-12.0306	0.07687	-42.7689	0.07655	-86.8175			0.07688	-1.0696	0.07719	-3.43623	0.07655	-7.77927	0.07657	-15.2017	0.07594	-26.5811			0.27832	9.07749
0.0726	-0.90624	0.07259	-1.86835	0.07225	-2.83945	0.07225	-3.82477	0.0725	-4.81631			0.09475	-0.07891	0.09479	-0.21058	0.09478	-0.38603	0.09475	-0.60682	0.0948	-0.87831			0.07217	-1.22028	0.07195	-3.80845	0.07221	-10.434	0.07219	-31.8264	0.07193	-80.7			0.07227	-1.01644	0.07254	-3.22294	0.07193	-7.20589	0.07196	-13.8773	0.07137	-24.0681			0.2829	9.75244
0.06801	-0.83911	0.06799	-1.74326	0.06769	-2.67024	0.06765	-3.62386	0.06788	-4.59538			0.09937	-0.07474	0.09938	-0.20101	0.0994	-0.36949	0.09939	-0.58103	0.09937	-0.84206			0.06755	-1.15657	0.06733	-3.52173	0.06765	-9.19789	0.0676	-25.0422	0.06728	-72.2963			0.0676	-0.96802	0.06796	-3.03185	0.06733	-6.69632	0.06735	-12.7285	0.06675	-21.8799			0.28752	10.411
0.06336	-0.76845	0.06337	-1.60721	0.06306	-2.47669	0.06304	-3.38188	0.0633	-4.32002			0.10397	-0.07048	0.10404	-0.19138	0.10399	-0.35297	0.10401	-0.55585	0.104	-0.80669			0.06293	-1.09865	0.0627	-3.27462	0.06303	-8.21448	0.063	-20.6732	0.0627	-60.9099			0.06296	-0.92221	0.06334	-2.85834	0.06273	-6.2487	0.06271	-11.7301	0.06213	-19.9747			0.29215	11.0595
0.05873	-0.69664	0.05874	-1.46401	0.05842	-2.26515	0.05844	-3.11085	0.05866	-3.9996			0.10859	-0.0662	0.10861	-0.1819	0.10862	-0.33665	0.10862	-0.53134	0.10861	-0.77088			0.05835	-1.0456	0.05812	-3.06076	0.0584	-7.40799	0.05836	-17.5754	0.05806	-47.4525			0.05839	-0.88035	0.05869	-2.69888	0.0581	-5.84356	0.05812	-10.8532	0.05752	-18.3012			0.29672	11.6673
0.05416	-0.63207	0.05416	-1.32892	0.05381	-2.05879	0.05383	-2.83736	0.05408	-3.66024			0.11318	-0.06177	0.11322	-0.17224	0.11323	-0.32058	0.11322	-0.50696	0.11324	-0.73626			0.05374	-0.99786	0.05346	-2.87195	0.05376	-6.74428	0.05378	-15.2492	0.05347	-36.8263			0.05378	-0.84177	0.05412	-2.55303	0.05347	-5.47623	0.0535	-10.0833	0.05287	-16.8251			0.30139	12.2868
0.0495	-0.57201	0.0495	-1.20279	0.0492	-1.86307	0.04919	-2.57213	0.04945	-3.32361			0.11783	-0.05709	0.11789	-0.16261	0.11786	-0.30407	0.11789	-0.48298	0.11786	-0.70138			0.04911	-0.95404	0.04885	-2.70544	0.04917	-6.18819	0.04914	-13.4401	0.04882	-30.0437			0.04916	-0.8059	0.04948	-2.42104	0.04886	-5.14729	0.04888	-9.39421	0.04827	-15.5272			0.30599	12.9154
0.04489	-0.51804	0.04491	-1.08796	0.0446	-1.6843	0.04459	-2.32173	0.04486	-3.00389			0.12247	-0.05219	0.12249	-0.15267	0.1225	-0.28805	0.12245	-0.46031	0.12251	-0.66764			0.04453	-0.91339	0.04426	-2.55674	0.04456	-5.71234	0.04453	-11.9962	0.04421	-25.3775			0.04456	-0.77213	0.04487	-2.30151	0.04425	-4.84855	0.04424	-8.78078	0.04364	-14.3791			0.3106	13.5698
0.04028	-0.47295	0.04033	-0.98677	0.03996	-1.52547	0.03995	-2.09905	0.04022	-2.70985			0.12707	-0.04702	0.12713	-0.1424	0.12709	-0.27134	0.1271	-0.43525	0.12711	-0.63353			0.03987	-0.87723	0.03962	-2.42404	0.03991	-5.30444	0.03989	-10.8146	0.03958	-21.9118			0.03995	-0.74122	0.04027	-2.19164	0.03946	-4.57089	0.03963	-8.22479	0.03902	-13.3583			0.31523	14.2922
0.03566	-0.43309	0.03561	-0.89858	0.03532	-1.3846	0.03529	-1.90053	0.0356	-2.45013			0.1326	-0.04188	0.13173	-0.13174	0.13175	-0.25443	0.13175	-0.41082	0.13175	-0.59915			0.03528	-0.84304	0.03498	-2.30348	0.03526	-4.9492	0.03522	-9.82921	0.03495	-19.2238			0.03526	-0.71223	0.03559	-2.08939	0.03469	-4.31938	0.03498	-7.72627	0.03435	-12.4495			0.31986	15.0768
0.03103	-0.3982	0.03101	-0.82147	0.03069	-1.25994	0.03069	-1.72459	0.03092	-2.21814			0.13784	-0.0393	0.13635	-0.12072	0.13635	-0.23688	0.13637	-0.38589	0.13635	-0.56482			0.03061	-0.8115	0.03036	-2.19537	0.0307	-4.63672	0.03066	-9.00468	0.03033	-17.0619			0.03067	-0.68465	0.03098	-1.99531	0.0301	-4.09593	0.03035	-7.27575	0.02976	-11.6357			0.3245	15.9607
0.02641	-0.37005	0.0264	-0.75634	0.02611	-1.15505	0.02609	-1.57533	0.02634	-2.01802			0.14248	-0.02951	0.14095	-0.10905	0.14093	-0.21877	0.14096	-0.36039	0.14095	-0.52928			0.02603	-0.78278	0.02576	-2.0973	0.02576	-4.34581	0.02605	-8.29859	0.02576	-15.3087			0.02606	-0.6594	0.02635	-1.90843	0.02544	-3.88856	0.0258	-6.86694	0.02515	-10.9087			0.32908	16.98
0.02181	-0.34768	0.0218	-0.70353	0.02149	-1.06772	0.02146	-1.44921	0.02173	-1.84937			0.14785	-0.01779	0.14557	-0.09641	0.14555	-0.19959	0.14559	-0.33381	0.14559	-0.49314			0.0214	-0.75616	0.02111	-2.00895	0.02116	-4.10305	0.02145	-7.68199	0.02109	-13.8596			0.02148	-0.63598	0.02175	-1.82786	0.02085	-3.69943	0.02116	-6.49708	0.02055	-10.2564			0.33371	18.1307
0.01718	-0.32948	0.01715	-0.65779	0.01689	-0.99214	0.01683	-1.33968	0.01712	-1.70285			0.15459	-0.00461	0.15016	-0.08285	0.15019	-0.17923	0.1502	-0.30579	0.15054	-0.45366			0.01681	-0.73126	0.01652	-1.9274	0.01656	-3.88445	0.01683	-7.15021	0.0165	-12.6403			0.01686	-0.6138	0.01717	-1.75351	0.01624	-3.52618	0.01658	-6.1593	0.01593	-9.66339			0.33831	19.4179
0.01256	-0.31833	0.01254	-0.6252	0.01225	-0.93586	0.01221	-1.25679	0.01252	-1.5876			0.16128	0.01057	0.15481	-0.06804	0.15479	-0.15764	0.15479	-0.27612	0.15512	-0.41438			0.01216	-0.70832	0.01191	-1.85326	0.01192	-3.68814	0.01219	-6.68379	0.0119	-11.6019			0.01226	-0.59269	0.01254	-1.68452	0.01161	-3.36922	0.01193	-5.84791	0.01131	-9.1253			0.34296	20.8192
0.00794	-0.31126	0.00793	-0.59979	0.00766	-0.88973	0.00763	-1.18605	0.00788	-1.49039			0.16679	0.02929	0.15944	-0.0518	0.15947	-0.13432	0.15943	-0.24474	0.15977	-0.37279			0.00755	-0.68708	0.00726	-1.78324	0.00733	-3.5091	0.00757	-6.27175	0.00725	-10.7135			0.00765	-0.57337	0.00791	-1.6201	0.00702	-3.22182	0.00733	-5.56457	0.00667	-8.63677			0.34753	22.2852
0.00332	-0.30923	0.00333	-0.58296	0.00302	-0.85585	0.003	-1.132	0.00329	-1.414			0.17144	0.04351	0.16409	-0.03393	0.16406	-0.10888	0.16403	-0.21115	0.16439	-0.32923			0.0029	-0.66783	0.0027	-1.7184	0.00267	-3.35073	0.00298	-5.91415	0.00263	-9.9388			0.00302	-0.55513	0.00329	-1.56049	0.0024	-3.08604	0.00271	-5.30115	0.00226	-8.20305			0.35214	23.7652
0.000476448	-0.30944	0.000590896	-0.57576	0.000409677	-0.84011	0.000447878	-1.10659	0.000495629	-1.37372			0.17601	0.05793	0.16866	-0.01384	0.16868	-0.08117	0.16867	-0.17488	0.16902	-0.28256			0.000259929	-0.65733	0.000116675	-1.68612	0.000154876	-3.27087	0.000412733	-5.72307	0.000269479	-9.56047			0.000438328	-0.54545	0.000591132	-1.52561	-0.000134688	-3.01541	0.000323725	-5.16913	-5.82856e-05	-7.98957			0.35679	25.2004
0.000113619	-0.30947	-2.00845e-05	-0.57358	-9.84021e-07	-0.8356	-9.84021e-07	-1.10069	-7.73861e-05	-1.36569			0.18063	0.07865	0.17331	0.00887	0.1733	-0.05036	0.17332	-0.1355	0.17362	-0.23188			-0.000150732	-0.65539	-0.000188933	-1.68225	-0.000208034	-3.26109	-0.000150732	-5.6884	-5.52295e-05	-9.51265			-9.84021e-07	-0.5436	-0.000191989	-1.5178	0.00238	-2.85441	-9.64866e-05	-5.14841	0.00236	-7.56206			0.36141	26.4489
0.00242	-0.00786	0.00272	-0.04937	0.00257	-0.18926	0.00257	-0.33618	0.00252	-0.50987			0.18525	0.10357	0.17791	0.03459	0.17789	-0.01631	0.17788	-0.09229	0.17821	-0.17724			0.00232	-0.60262	0.00239	-1.57054	0.00237	-3.0594	0.00237	-5.34444	0.00233	-8.908			0.0024	-0.5067	0.00242	-1.43119	0.00703	-2.63778	0.00241	-4.87866	0.00701	-6.94978			0.36603	27.3475
0.00705	0.13022	0.00733	0.21432	0.00733	0.23677	0.00735	0.21674	0.00726	0.15855			0.18991	0.13399	0.18256	0.06471	0.18248	0.0225	0.18254	-0.04389	0.18285	-0.11655			0.00693	-0.55007	0.00704	-1.44308	0.00698	-2.80494	0.00698	-4.87472	0.00697	-8.04409			0.00701	-0.46394	0.00702	-1.32025	0.0116	-2.45886	0.00715	-4.48823	0.01166	-6.45583			0.37067	27.7048
0.01163	0.18272	0.01192	0.33368	0.01196	0.43053	0.01194	0.48367	0.01188	0.49533			0.19446	0.17153	0.18715	0.09977	0.18714	0.06709	0.18711	0.01066	0.18742	-0.04963			0.01157	-0.51267	0.0116	-1.34724	0.01161	-2.608	0.01173	-4.49289	0.01156	-7.36047			0.01162	-0.43121	0.0116	-1.23369	0.01623	-2.3051	0.01192	-4.17224	0.01625	-6.03116			0.37526	27.3643
0.01628	0.21823	0.01656	0.4152	0.01654	0.56418	0.01653	0.67102	0.01649	0.7363			0.19914	0.21851	0.19174	0.14166	0.19178	0.11878	0.19173	0.07299	0.19206	0.02565			0.01615	-0.48137	0.01622	-1.26616	0.01623	-2.44356	0.0165	-4.16763	0.01621	-6.77804			0.01623	-0.40302	0.01623	-1.15825	0.02082	-2.16998	0.01652	-3.90612	0.02086	-5.65568			0.37992	26.2596
0.02085	0.24619	0.02119	0.47902	0.02121	0.66876	0.02116	0.82004	0.02127	0.93625			0.20372	0.2774	0.19637	0.19251	0.1964	0.17994	0.19639	0.14544	0.19672	0.11219			0.02077	-0.45397	0.02086	-1.19554	0.02084	-2.2956	0.02113	-3.89556	0.02081	-6.28392			0.02086	-0.37814	0.02083	-1.09065	0.0255	-2.04884	0.02116	-3.67103	0.0255	-5.31902			0.38448	24.075
0.02549	0.27593	0.0258	0.54273	0.02579	0.77013	0.02575	0.95509	0.02606	1.11137			0.20835	0.35199	0.20099	0.25485	0.20104	0.25326	0.20101	0.23057	0.20132	0.21175			0.0254	-0.42894	0.02545	-1.13096	0.02547	-2.16151	0.02574	-3.65024	0.0254	-5.84825			0.02546	-0.35499	0.02547	-1.02957	0.03005	-1.93804	0.02578	-3.4585	0.03008	-5.0128			0.3891	20.2498
0.0301	0.30505	0.0304	0.6047	0.03043	0.86705	0.03038	1.08656	0.03067	1.27876			0.21298	0.44739	0.20564	0.33232	0.20562	0.34218	0.20563	0.33204	0.20595	0.32855			0.03004	-0.40578	0.03005	-1.072	0.0301	-2.04185	0.03032	-3.43284	0.03003	-5.4637			0.03008	-0.334	0.03003	-0.97289	0.03467	-1.83458	0.03036	-3.2651	0.03466	-4.73323			0.39378	14.7324
0.03472	0.33776	0.03499	0.67214	0.03501	0.96465	0.03499	1.22179	0.03523	1.44744			0.21764	0.56824	0.21024	0.43047	0.21024	0.45295	0.21023	0.45579	0.21054	0.46807			0.03458	-0.3844	0.03464	-1.01772	0.03467	-1.93197	0.035	-3.23436	0.03468	-5.11741			0.03465	-0.31397	0.0347	-0.91945	0.0393	-1.73757	0.03498	-3.08668	0.03948	-4.46809			0.39841	9.76135
0.03935	0.37671	0.03969	0.74757	0.03964	1.0751	0.03966	1.36851	0.03991	1.62887			0.2222	0.72332	0.2149	0.55629	0.21488	0.59245	0.21484	0.60926	0.21519	0.63739			0.03925	-0.36394	0.03931	-0.96624	0.0393	-1.8313	0.0396	-3.05147	0.03927	-4.80592			0.03933	-0.29502	0.03927	-0.8696	0.04394	-1.6467	0.03961	-2.92147	0.04428	-4.22027			0.403	6.85533
0.04397	0.41664	0.04429	0.82781	0.04431	1.19244	0.04428	1.5205	0.04453	1.81436			0.22684	0.91939	0.21945	0.71837	0.21947	0.7703	0.21951	0.8022	0.21978	0.84671			0.04389	-0.34456	0.04392	-0.91878	0.04394	-1.7365	0.04426	-2.8857	0.04404	-4.51323			0.04395	-0.2768	0.04397	-0.82242	0.04857	-1.56079	0.04427	-2.76781	0.04888	-3.99477			0.40763	5.21937
0.04859	0.46379	0.04892	0.91699	0.04892	1.32157	0.04892	1.6869	0.04915	2.01598			0.23142	1.16553	0.22406	0.92948	0.2241	1.00072	0.22406	1.04938	0.22458	1.12276			0.04852	-0.32579	0.04855	-0.87286	0.04855	-1.6478	0.04884	-2.72909	0.04885	-4.25195			0.04856	-0.25953	0.04853	-0.77703	0.05319	-1.4788	0.04886	-2.62405	0.05347	-3.78317			0.41226	4.15443
0.0532	0.51628	0.05351	1.01414	0.05352	1.46472	0.05352	1.8692	0.05375	2.23697			0.23609	1.47004	0.22871	1.20327	0.22868	1.29945	0.22871	1.36737	0.2293	1.47175			0.05312	-0.3074	0.05315	-0.82881	0.05316	-1.56441	0.05342	-2.58325	0.05348	-4.00963			0.05319	-0.24331	0.05317	-0.73322	0.0578	-1.39976	0.0535	-2.48713	0.05811	-3.58482			0.41688	3.40534
0.05781	0.57184	0.05813	1.11987	0.05814	1.61662	0.0581	2.06325	0.05837	2.46972			0.24072	1.83143	0.23328	1.55463	0.23331	1.68439	0.23332	1.77527	0.23395	1.90503			0.05774	-0.2893	0.0578	-0.78571	0.05777	-1.48475	0.05807	-2.44622	0.05807	-3.78505			0.05776	-0.22605	0.05779	-0.69106	0.06237	-1.32283	0.05806	-2.3567	0.06272	-3.39595			0.42148	2.86063
0.06241	0.63634	0.06271	1.2421	0.06275	1.78718	0.06271	2.27965	0.063	2.72861			0.24537	2.24937	0.238	2.00375	0.23798	2.17973	0.23796	2.29925	0.23859	2.45799			0.06237	-0.2714	0.06242	-0.74338	0.06241	-1.40587	0.06268	-2.31576	0.06268	-3.57353			0.06239	-0.20919	0.06243	-0.64977	0.06702	-1.24703	0.06268	-2.23214	0.06734	-3.21527			0.42606	2.47569
0.06709	0.70424	0.06731	1.37154	0.0674	1.97094	0.06736	2.51469	0.06761	3.00749			0.24996	2.71819	0.24258	2.55034	0.24259	2.7945	0.24259	2.95138	0.24321	3.14315			0.06695	-0.25305	0.06704	-0.70165	0.06703	-1.32957	0.0673	-2.19142	0.0673	-3.37312			0.06705	-0.1924	0.06703	-0.60899	0.07162	-1.17342	0.0673	-2.11058	0.07196	-3.04158			0.43073	2.2298
0.07165	0.77398	0.07196	1.50656	0.07196	2.16569	0.07199	2.75991	0.07222	3.30092			0.25458	3.23031	0.24721	3.19709	0.2472	3.53759	0.2472	3.74733	0.24782	3.98115			0.07161	-0.23443	0.07164	-0.66026	0.07161	-1.2559	0.0719	-2.07273	0.07191	-3.18379			0.07162	-0.17549	0.07164	-0.56858	0.07626	-1.10029	0.07193	-1.99388	0.07657	-2.87211			0.43531	2.08098
0.07632	0.84355	0.0766	1.64278	0.07659	2.36529	0.0766	3.01779	0.07685	3.61253			0.25921	3.77947	0.25182	3.93594	0.2518	4.40372	0.2518	4.68785	0.25242	4.97698			0.0762	-0.2153	0.07622	-0.61916	0.07624	-1.18358	0.07655	-1.95664	0.07656	-3.0027			0.07626	-0.1581	0.07628	-0.52756	0.08091	-1.0278	0.07655	-1.87727	0.08123	-2.70574			0.43997	1.98712
0.08095	0.90763	0.08125	1.77563	0.08126	2.56415	0.08126	3.27805	0.08152	3.92918			0.26381	4.36552	0.25644	4.73999	0.25644	5.37043	0.25646	5.75056	0.25705	6.10806			0.08083	-0.19585	0.08089	-0.57742	0.08089	-1.11227	0.08118	-1.84376	0.08118	-2.82938			0.08091	-0.14046	0.0809	-0.48691	0.08554	-0.95702	0.08123	-1.76382	0.08586	-2.54658			0.44459	1.92917
0.08557	0.9553	0.08585	1.88566	0.08588	2.73882	0.08588	3.51476	0.08614	4.2256			0.2684	4.97532	0.26106	5.60779	0.26107	6.42136	0.26108	6.92188	0.26169	7.36543			0.08546	-0.17627	0.08554	-0.5364	0.08553	-1.04186	0.0858	-1.73389	0.0858	-2.66536			0.08555	-0.12304	0.08555	-0.44637	0.09013	-0.88673	0.08582	-1.65346	0.09046	-2.39211			0.44918	1.89303
0.09018	0.99265	0.09048	1.97685	0.09049	2.89162	0.0905	3.73245	0.09071	4.50355			0.27304	5.60453	0.26566	6.52007	0.26564	7.5327	0.26564	8.16899	0.26627	8.7137			0.09009	-0.15586	0.09015	-0.49428	0.09014	-0.97199	0.09043	-1.62782	0.09041	-2.50217			0.09018	-0.10538	0.09015	-0.40589	0.0948	-0.8168	0.09042	-1.54557	0.09506	-2.24049			0.4538	1.85856
0.0948	1.01942	0.0951	2.0457	0.09511	3.017	0.09511	3.91911	0.09534	4.75375			0.27767	6.24497	0.27027	7.46813	0.27028	8.69022	0.27022	9.47253	0.27093	10.1286			0.09472	-0.13455	0.09472	-0.45179	0.09474	-0.90195	0.09502	-1.52042	0.09503	-2.34571			0.09477	-0.08794	0.09478	-0.36528	0.09935	-0.74937	0.09508	-1.43889	0.09967	-2.09411			0.45841	1.84151
0.09942	1.02706	0.09974	2.0815	0.09971	3.09762	0.09971	4.05514	0.09996	4.95257			0.28232	6.8706	0.27491	8.4481	0.2749	9.88551	0.2749	10.8269	0.27584	11.7094			0.09934	-0.11272	0.0994	-0.4089	0.09938	-0.83265	0.09964	-1.41465	0.09964	-2.1929			0.09937	-0.07122	0.09935	-0.32578	0.10402	-0.68162	0.09968	-1.33589	0.10429	-1.95061			0.46303	1.82398
0.10404	1.03393	0.10435	2.10784	0.10433	3.15745	0.10432	4.1643	0.10454	5.11842			0.28691	7.47145	0.27956	9.44674	0.27956	11.1138	0.27956	12.2162	0.28047	13.2138			0.10395	-0.08916	0.10399	-0.36372	0.10402	-0.76044	0.10427	-1.30738	0.10427	-2.0392			0.10402	-0.05458	0.10401	-0.28635	0.10862	-0.61585	0.10429	-1.2333	0.10888	-1.81051			0.46769	1.81269
0.10861	1.02665	0.10894	2.10655	0.10893	3.18052	0.10893	4.22603	0.1092	5.22789			0.2915	8.05405	0.28418	10.4513	0.28415	12.352	0.28419	13.6178	0.28511	14.7384			0.10856	-0.0644	0.10857	-0.31743	0.10859	-0.68778	0.10885	-1.2008	0.10885	-1.88607			0.10862	-0.04257	0.10861	-0.24816	0.1132	-0.55264	0.10887	-1.13351	0.11353	-1.67445			0.4723	1.80579
0.11323	1.01176	0.11356	2.08751	0.11352	3.17358	0.11354	4.24488	0.11378	5.28785			0.29612	8.60248	0.28878	11.4631	0.28876	13.6022	0.28876	15.0325	0.28971	16.2819			0.11315	-0.04016	0.11315	-0.2691	0.11322	-0.61886	0.11349	-1.09258	0.11345	-1.73354			0.11322	-0.02827	0.11322	-0.21162	0.11789	-0.49067	0.11353	-1.03682	0.11812	-1.54349			0.4769	1.79554
0.11787	0.99409	0.11817	2.05638	0.11817	3.14248	0.1182	4.22968	0.11844	5.30424			0.30076	9.15354	0.29336	12.4565	0.2934	14.8554	0.29339	16.4605	0.2943	17.8407			0.11889	-0.00107	0.11785	-0.21799	0.11787	-0.53782	0.11814	-0.98086	0.11811	-1.58028			0.11894	-0.00484	0.11785	-0.17637	0.12262	-0.43025	0.11817	-0.94224	0.12279	-1.41733			0.48151	1.7898
0.1225	0.96414	0.12279	2.00453	0.12283	3.08002	0.12279	4.1697	0.12307	5.26221			0.30536	9.70432	0.29804	13.4286	0.29801	16.0963	0.29796	17.8917	0.29893	19.408			0.12552	0.04172	0.12248	-0.16453	0.12267	-0.45239	0.12274	-0.86612	0.12272	-1.42428			0.1257	0.00692	0.12247	-0.14472	0.12741	-0.37407	0.12279	-0.85327	0.12738	-1.29697			0.48613	1.79205
0.12715	0.93173	0.1274	1.94176	0.12744	2.99675	0.12745	4.07704	0.12766	5.17357			0.30995	10.2711	0.30262	14.3954	0.30258	17.3441	0.30261	19.3364	0.30351	20.9929			0.13107	0.09014	0.12707	-0.10671	0.12743	-0.36436	0.12737	-0.74765	0.12735	-1.2648			0.13263	0.01933	0.12711	-0.11474	0.13202	-0.32253	0.1274	-0.76858	0.13203	-1.18125			0.4908	1.79853
0.13175	0.89689	0.13205	1.87396	0.132	2.8986	0.13206	3.95901	0.13232	5.04914			0.31469	10.8855	0.30721	15.3437	0.30722	18.5786	0.30724	20.777	0.30813	22.5788			0.13563	0.1333	0.13171	-0.04344	0.132	-0.27312	0.132	-0.62273	0.13198	-1.10092			0.13816	0.03049	0.13172	-0.087	0.13664	-0.27429	0.13203	-0.68766	0.13669	-1.07168			0.4954	1.81769
0.13634	0.85751	0.13666	1.79649	0.13668	2.78531	0.13666	3.81874	0.13693	4.88723			0.31923	11.539	0.31183	16.2881	0.31182	19.8036	0.31183	22.212	0.31276	24.1666			0.14028	0.1829	0.13635	0.02504	0.13666	-0.17544	0.13677	-0.48386	0.13661	-0.92902			0.14372	0.04372	0.13634	-0.06165	0.14126	-0.22769	0.13661	-0.61191	0.14128	-0.96463			0.49879	1.84369
0.14098	0.82328	0.1413	1.72276	0.14128	2.67109	0.14127	3.66703	0.14151	4.7068			0.32385	12.2405	0.31648	17.2599	0.31649	21.0482	0.31652	23.666	0.31743	25.7719			0.14491	0.24144	0.14091	0.10208	0.14125	-0.06736	0.14152	-0.33875	0.14119	-0.74747			0.14926	0.05801	0.14092	-0.0367	0.14585	-0.18187	0.14124	-0.53864	0.14589	-0.86022			0.49992	1.84712
0.14559	0.78687	0.14589	1.64806	0.1459	2.55502	0.14589	3.51105	0.14617	4.51639			0.3285	12.9997	0.32112	18.2135	0.32113	22.2632	0.32112	25.0873	0.32207	27.3516			0.14949	0.31013	0.14556	0.19056	0.14587	0.05191	0.14614	-0.18222	0.14597	-0.54436			0.1539	0.0699	0.14555	-0.01229	0.15048	-0.13607	0.14586	-0.46755	0.1505	-0.75767			0.49749	-0.03064
0.15022	0.74941	0.15048	1.57223	0.15055	2.43765	0.15046	3.34874	0.15076	4.31428			0.33308	13.7923	0.32576	19.1951	0.32573	23.4793	0.32575	26.5035	0.32664	28.9292			0.15411	0.39253	0.15015	0.29228	0.15048	0.18754	0.15079	-0.00928	0.15076	-0.32014			0.15852	0.08355	0.15018	0.01203	0.1551	-0.08911	0.1505	-0.39461	0.15508	-0.65492			0.49291	-0.92824
0.15478	0.71498	0.1551	1.49947	0.15512	2.32327	0.15513	3.19035	0.1554	4.10916			0.33771	14.5756	0.33037	20.228	0.33033	24.7167	0.3304	27.9282	0.33128	30.505			0.15878	0.49259	0.15477	0.4113	0.1551	0.34272	0.1554	0.18504	0.15536	-0.08093			0.16313	0.09814	0.1548	0.03781	0.15973	-0.04088	0.15508	-0.32226	0.15975	-0.54989			0.48831	-1.10631
0.15947	0.68198	0.15977	1.42932	0.15977	2.21314	0.15974	3.03663	0.16	3.90692			0.34228	15.3054	0.3349	21.3019	0.33494	25.972	0.33502	29.3525	0.33589	32.0723			0.16341	0.61274	0.15943	0.55281	0.15974	0.52284	0.16	0.40673	0.15999	0.18627			0.16776	0.11514	0.15941	0.06652	0.16437	0.01019	0.15976	-0.24751	0.16452	-0.43696			0.48369	-1.20311
0.16411	0.64813	0.16437	1.35939	0.16439	2.10387	0.16436	2.88255	0.16463	3.70385			0.34695	15.859	0.33955	22.4381	0.33958	27.2757	0.33955	30.8049	0.34051	33.6705			0.16801	0.76011	0.16401	0.71996	0.16434	0.73237	0.16462	0.66011	0.16463	0.48626			0.17238	0.13466	0.16405	0.09726	0.16898	0.06606	0.16435	-0.17046	0.16926	-0.32167			0.47908	-1.27383
0.1687	0.61733	0.169	1.29405	0.16898	2.00027	0.169	2.73777	0.16926	3.51149			0.35155	16.0575	0.34417	23.6204	0.34419	28.6386	0.34418	32.3025	0.34509	35.2872			0.1726	0.94162	0.16865	0.9209	0.16899	0.97874	0.16925	0.95038	0.1694	0.84183			0.17698	0.15561	0.16863	0.13105	0.17361	0.12706	0.16899	-0.08859	0.17391	-0.20186			0.47442	-1.32907
0.1733	0.58916	0.17364	1.23565	0.17362	1.90778	0.17357	2.60555	0.17385	3.337			0.35621	15.6397	0.34877	24.8087	0.34878	30.0453	0.34882	33.8404	0.3497	36.9428			0.17725	1.16223	0.17325	1.16455	0.17359	1.27429	0.17386	1.29505	0.17417	1.24612			0.18154	0.18045	0.17327	0.16896	0.1782	0.19148	0.1736	-0.000861408	0.1785	-0.07784			0.46982	-1.37852
0.17793	0.55989	0.17823	1.17584	0.17825	1.81244	0.17822	2.47324	0.17849	3.16591			0.36083	14.2658	0.35344	25.9653	0.35341	31.4933	0.35344	35.427	0.35435	38.6441			0.18185	1.43339	0.17788	1.45665	0.17818	1.62165	0.17848	1.69282	0.17877	1.69769			0.18618	0.20771	0.17794	0.2094	0.18281	0.26481	0.17819	0.09045	0.18313	0.05827			0.46518	-1.40966
0.18254	0.53772	0.18283	1.1307	0.18286	1.73944	0.18285	2.36491	0.18309	3.01969			0.36544	11.8085	0.35806	27.0038	0.35808	32.9549	0.35808	37.0565	0.35899	40.3807			0.18641	1.76096	0.18247	1.81483	0.18281	2.04208	0.18309	2.16746	0.18337	2.2291			0.19077	0.2382	0.18252	0.25693	0.18743	0.34392	0.18282	0.19322	0.1877	0.20385			0.46055	-1.43829
0.18714	0.51571	0.18743	1.08337	0.18746	1.66429	0.18741	2.26275	0.18767	2.88248			0.37007	8.75866	0.36269	27.7934	0.36268	34.3705	0.36268	38.6966	0.36361	42.1437			0.19105	2.14655	0.18711	2.24603	0.18744	2.54157	0.18769	2.72472	0.18799	2.8422			0.19546	0.27287	0.18711	0.30833	0.19199	0.43095	0.18744	0.30372	0.19238	0.35912			0.45598	-1.46502
0.19177	0.49561	0.19205	1.04211	0.19208	1.59969	0.19207	2.17001	0.19228	2.75887			0.37463	6.17119	0.36728	28.147	0.36729	35.6971	0.36727	40.3342	0.3682	43.9307			0.1957	2.59171	0.1917	2.7628	0.19204	3.1347	0.19229	3.37798	0.19258	3.55257			0.20009	0.31133	0.19174	0.36539	0.19669	0.52698	0.19204	0.42306	0.19696	0.52854			0.45136	-1.47815
0.19658	0.484	0.1967	1.00627	0.19673	1.54313	0.19665	2.09024	0.19696	2.65298			0.37924	4.50922	0.3719	27.8041	0.37192	36.8344	0.37191	41.927	0.3729	45.7158			0.20032	3.08627	0.19634	3.37359	0.19664	3.83527	0.19695	4.14495	0.19728	4.37735			0.20472	0.35379	0.19637	0.42915	0.20132	0.62976	0.19667	0.55331	0.20162	0.70674			0.44676	-1.49914
0.20129	0.46117	0.2013	0.96799	0.20133	1.48503	0.20132	2.01052	0.20158	2.54857			0.38386	3.50381	0.3765	26.4563	0.37653	37.6238	0.37655	43.4055	0.37747	47.466			0.20492	3.61611	0.20097	4.07503	0.20132	4.64344	0.20155	5.02426	0.20191	5.31652			0.2093	0.40228	0.20101	0.49784	0.20594	0.74094	0.20131	0.69212	0.20628	0.89678			0.44215	-1.51383
0.20593	0.44523	0.20596	0.93513	0.20595	1.43286	0.20588	1.93952	0.20621	2.45444			0.38848	2.84546	0.38114	23.8806	0.38115	37.9181	0.38116	44.7132	0.38203	49.1544			0.20955	4.18169	0.20557	4.85651	0.20593	5.55618	0.20619	6.02064	0.20647	6.37488			0.21393	0.4569	0.20566	0.57361	0.21055	0.86254	0.20592	0.84012	0.21102	1.10627			0.43754	-1.527
0.21055	0.43124	0.21056	0.90704	0.21055	1.38924	0.21054	1.87652	0.21079	2.37251			0.39316	2.384	0.38574	20.0362	0.38573	37.464	0.38575	45.7054	0.38668	50.6956			0.21417	4.7828	0.21022	5.70988	0.21055	6.57045	0.21078	7.13321	0.21108	7.55601			0.21852	0.51867	0.21023	0.6574	0.21515	0.99211	0.21054	0.99833	0.21576	1.32798			0.43288	-1.54041
0.21521	0.41731	0.21521	0.87774	0.21516	1.34488	0.21518	1.8181	0.21545	2.29615			0.39778	2.04176	0.39039	15.66	0.39035	36.0378	0.3904	46.2354	0.39132	52.0103			0.21874	5.41374	0.21482	6.625	0.21516	7.67055	0.21543	8.34787	0.21571	8.84882			0.22311	0.59222	0.21481	0.74973	0.21977	1.13674	0.21517	1.17183	0.22036	1.56024			0.42824	-1.54791
0.21979	0.4079	0.21978	0.85781	0.21978	1.31165	0.2198	1.7703	0.22003	2.23202			0.40241	1.78077	0.39505	12.0328	0.39505	33.4541	0.39501	46.1456	0.39596	53.0079			0.22339	6.09881	0.21939	7.5953	0.21975	8.84715	0.22001	9.65386	0.22049	10.3044			0.22774	0.67622	0.21949	0.85255	0.22439	1.29633	0.21974	1.35672	0.22498	1.81168			0.42361	-1.55735
0.2244	0.39803	0.22442	0.83716	0.22437	1.28272	0.22442	1.72683	0.22465	2.17813			0.40703	1.58402	0.39966	9.50333	0.39959	29.5468	0.39967	45.2154	0.40055	53.4971			0.228	6.82819	0.22405	8.62814	0.22437	10.1033	0.22464	11.0607	0.22524	11.8626			0.23239	0.77572	0.22408	0.96813	0.229	1.47186	0.22436	1.55986	0.22962	2.08033			0.41902	-1.5679
0.22904	0.3893	0.22901	0.81895	0.22903	1.25281	0.22903	1.68762	0.22926	2.12674			0.41163	1.43142	0.40428	7.73229	0.40426	24.7049	0.40424	43.2918	0.4052	53.3652			0.2326	7.61206	0.22864	9.72143	0.22898	11.4332	0.22925	12.546	0.22988	13.4561			0.23706	0.89572	0.22866	1.09845	0.23362	1.66569	0.22895	1.77916	0.23425	2.37233			0.41445	-1.57675
0.23365	0.38211	0.23363	0.80446	0.23363	1.22956	0.23359	1.65432	0.23391	2.08492			0.41627	1.31232	0.40892	6.424	0.40891	20.0334	0.4089	40.2217	0.40984	52.4751			0.23728	8.46357	0.23329	10.8849	0.23359	12.8281	0.23387	14.1042	0.23448	15.1374			0.24166	1.03486	0.2333	1.24598	0.23826	1.88579	0.23364	2.02013	0.23887	2.68864			0.40979	-1.58783
0.23834	0.37565	0.23829	0.79267	0.2383	1.21271	0.23828	1.6318	0.23854	2.0512			0.42085	1.22308	0.41352	5.42313	0.41352	16.3179	0.41351	35.9161	0.4144	50.6851			0.2419	9.34617	0.23795	12.1304	0.23828	14.3104	0.23858	15.7505	0.23915	16.9023			0.24629	1.20276	0.23795	1.41748	0.24289	2.12277	0.23827	2.2877	0.24348	3.0245			0.40518	-1.60341
0.24292	0.36899	0.24293	0.77791	0.24294	1.18796	0.24293	1.60032	0.24317	2.01087			0.42545	1.15826	0.41825	4.63509	0.41811	13.5667	0.41814	30.7969	0.41904	47.8751			0.24656	10.2742	0.24254	13.4131	0.24289	15.8384	0.24316	17.445	0.24379	18.7242			0.25088	1.40942	0.24258	1.60565	0.24753	2.38875	0.24288	2.5725	0.24813	3.38857			0.40052	-1.61949
0.24757	0.36411	0.24754	0.76656	0.24756	1.17129	0.24753	1.57555	0.24779	1.98041			0.43012	1.10951	0.42306	3.99768	0.42273	11.4566	0.42273	25.8726	0.42365	43.9292			0.25114	11.2509	0.2472	14.7478	0.24749	17.4225	0.24778	19.2015	0.24837	20.6085			0.25549	1.66559	0.24721	1.82351	0.25213	2.69112	0.24748	2.88523	0.25277	3.78801			0.39595	-1.63773
0.25217	0.36049	0.25214	0.75839	0.25215	1.15664	0.25212	1.55598	0.2524	1.95668			0.43478	1.07509	0.42762	3.52022	0.42732	9.78293	0.42735	21.7954	0.42825	38.9942			0.25576	12.2339	0.25173	16.1352	0.2521	19.0627	0.25237	21.0202	0.25297	22.552			0.26009	1.99606	0.25182	2.07887	0.25672	3.03479	0.25212	3.23223	0.25734	4.22373			0.39131	-1.66362
0.25678	0.35518	0.25678	0.74836	0.25677	1.14136	0.25675	1.53472	0.25701	1.9268			0.43936	1.04205	0.43226	3.15998	0.43198	8.41143	0.43198	18.5499	0.43292	33.8163			0.2604	13.2296	0.25643	17.5502	0.25674	20.7372	0.257	22.8683	0.25758	24.534			0.26469	2.42193	0.25644	2.37879	0.26137	3.44142	0.25673	3.61793	0.26195	4.71825			0.38667	-1.67551
0.26138	0.35454	0.26136	0.74527	0.26139	1.1362	0.26138	1.52432	0.26161	1.91488			0.444	1.01858	0.43689	2.87909	0.43661	7.299	0.43658	15.9613	0.43754	29.1525			0.26496	14.2235	0.26106	19.0036	0.26135	22.4609	0.26161	24.7792	0.2622	26.5756			0.2693	2.95895	0.26101	2.74838	0.26591	3.92752	0.26135	4.06288	0.26658	5.27713			0.38202	-1.69628
0.26597	0.35298	0.26597	0.73944	0.266	1.12673	0.26597	1.51346	0.26618	1.89944			0.44855	1.00005	0.44151	2.65822	0.4412	6.4007	0.44121	13.8558	0.44213	25.2534			0.26956	15.189	0.26563	20.4703	0.26596	24.2118	0.26622	26.7205	0.26683	28.6549			0.27395	3.61652	0.26564	3.20686	0.27059	4.51616	0.26594	4.57811	0.27118	5.91937			0.37744	-1.72324
0.27062	0.35223	0.2706	0.73751	0.27062	1.12194	0.27057	1.50732	0.27084	1.8891			0.45316	0.97955	0.44619	2.49147	0.44585	5.67628	0.44582	12.1077	0.44677	22.0198			0.27424	16.1317	0.27027	21.9429	0.27054	25.9818	0.27084	28.6906	0.27142	30.7665			0.27863	4.38739	0.27026	3.78064	0.27525	5.23169	0.27057	5.18476	0.27582	6.66816			0.37284	-1.74421
0.27524	0.35402	0.27526	0.73788	0.27522	1.12075	0.27523	1.50307	0.27553	1.88496			0.4578	0.96977	0.45073	2.36279	0.45044	5.09818	0.45047	10.627	0.45138	19.3114			0.27887	17.0365	0.27488	23.403	0.27523	27.7578	0.27548	30.6803	0.27609	32.9069			0.28323	5.25018	0.27489	4.48741	0.27983	6.08263	0.27524	5.90492	0.28045	7.53188			0.36821	-1.78403
0.2799	0.35244	0.27984	0.73394	0.27987	1.11543	0.27987	1.49541	0.28012	1.87404			0.46244	0.95673	0.45536	2.25536	0.45507	4.62749	0.45508	9.36905	0.456	17.0373			0.28347	17.8738	0.2795	24.8498	0.27984	29.5227	0.28007	32.6664	0.28068	35.0569			0.28782	6.19113	0.27954	5.33012	0.28449	7.06554	0.27985	6.75162	0.28504	8.52165			0.36357	-1.82358
0.2845	0.3537	0.28445	0.73341	0.28448	1.11248	0.28444	1.49023	0.28472	1.86683			0.46702	0.94554	0.45994	2.16748	0.45981	4.26244	0.45969	8.33709	0.46056	15.1189			0.28808	18.6464	0.2841	26.2632	0.28449	31.2649	0.28469	34.6433	0.28534	37.2078			0.29244	7.1957	0.28416	6.29801	0.28909	8.17117	0.28449	7.72901	0.28968	9.63461			0.35899	-1.87136
0.2891	0.35609	0.28911	0.73478	0.28911	1.11311	0.28909	1.48883	0.28935	1.86589			0.47162	0.93736	0.46455	2.08812	0.46458	3.94807	0.46424	7.48347	0.46521	13.4685			0.29271	19.363	0.28874	27.6374	0.28907	32.9901	0.28932	36.618	0.28995	39.3555			0.29704	8.24003	0.28875	7.37578	0.29368	9.38017	0.28907	8.83446	0.29433	10.86			0.35436	-1.92939
0.2937	0.35719	0.29372	0.73527	0.2937	1.11147	0.29371	1.48817	0.29397	1.86008			0.4763	0.92816	0.4692	2.02803	0.46922	3.71176	0.46893	6.77336	0.46986	12.0285			0.29728	20.0162	0.29335	28.964	0.2937	34.6789	0.29395	38.5635	0.29452	41.4917			0.30164	9.32656	0.29338	8.54346	0.2983	10.675	0.2937	10.0495	0.29889	12.1908			0.3497	-1.99383
0.29833	0.36223	0.29834	0.74002	0.2983	1.11654	0.29832	1.49097	0.29854	1.86478			0.48091	0.92195	0.47385	1.97903	0.47385	3.51677	0.47356	6.17999	0.47446	10.792			0.30195	20.6774	0.29798	30.2204	0.29828	36.3086	0.29855	40.464	0.29919	43.6074			0.30628	10.4382	0.29799	9.78166	0.30289	12.0563	0.29833	11.3643	0.30353	13.6074			0.34509	-2.06828
0.30293	0.36667	0.30292	0.74618	0.30294	1.12364	0.30292	1.49761	0.3032	1.87048			0.48553	0.91947	0.47845	1.92825	0.47844	3.33587	0.47814	5.67791	0.47908	9.71311			0.30656	21.3487	0.30255	31.4454	0.3029	37.8983	0.30312	42.3191	0.30375	45.6813			0.31088	11.574	0.30262	11.0958	0.3075	13.4975	0.30292	12.7656	0.30809	15.0937			0.34047	-2.16101
0.30754	0.37133	0.30755	0.75171	0.30752	1.12967	0.3075	1.50449	0.30777	1.8782			0.49016	0.91918	0.48306	1.88784	0.48308	3.19284	0.48276	5.26724	0.48369	8.78278			0.31118	22.075	0.3072	32.6288	0.3075	39.4415	0.3078	44.1128	0.30836	47.6775			0.31556	12.727	0.30719	12.4581	0.31215	14.9921	0.30749	14.234	0.31278	16.6516			0.33586	-2.26601
0.31217	0.37565	0.31219	0.75921	0.31218	1.13883	0.31216	1.51508	0.31244	1.88752			0.49477	0.92701	0.4877	1.8541	0.48772	3.07344	0.48736	4.92999	0.48832	7.99058			0.31582	22.9266	0.31182	33.7827	0.31215	40.9593	0.31242	45.8703	0.31304	49.6178			0.3202	13.8736	0.31185	13.8606	0.31678	16.5523	0.31212	15.7659	0.31745	18.2851			0.33127	-2.38912
0.31683	0.38362	0.31684	0.7722	0.31683	1.15557	0.31681	1.53402	0.31708	1.90798			0.49843	0.94051	0.49227	1.82055	0.49234	2.9612	0.49197	4.63835	0.49293	7.30257			0.32039	23.906	0.31647	34.9494	0.3168	42.48	0.31707	47.6409	0.31766	51.5536			0.32478	15.0136	0.31649	15.3079	0.32141	18.1348	0.31679	17.374	0.32205	19.9532			0.32665	-2.54892
0.32145	0.38691	0.32145	0.77746	0.32145	1.16056	0.32147	1.53993	0.3217	1.91477			0.49997	0.94343	0.49693	1.80736	0.49695	2.87838	0.4968	4.39512	0.49752	6.73858			0.32506	25.0612	0.32111	36.0867	0.32142	43.9336	0.32169	49.3519	0.3223	53.4467			0.32944	16.1603	0.32108	16.764	0.32602	19.7438	0.32142	19.0119	0.32666	21.6708			0.32202	-2.73373
0.32609	0.39178	0.32605	0.786	0.32605	1.17313	0.32607	1.55268	0.32632	1.92915			0.49751	-0.18019	0.49946	1.79487	0.49955	2.83125	0.49956	4.26614	0.49978	6.46438			0.32966	26.4213	0.32568	37.2694	0.32603	45.3715	0.32632	51.0305	0.32694	55.3107			0.334	17.3027	0.32574	18.2354	0.33063	21.3792	0.32603	20.6881	0.33128	23.4266			0.3174	-2.95683
0.33072	0.39685	0.33069	0.79654	0.33067	1.18717	0.33066	1.56932	0.33091	1.94731			0.4929	-0.44318	0.50009	1.79391	0.50007	2.82206	0.50003	4.24337	0.49738	3.16883			0.3343	27.9611	0.33034	38.5247	0.33064	46.8189	0.3309	52.6989	0.33152	57.1628			0.33864	18.4474	0.33039	19.7201	0.33526	23.0222	0.33064	22.4017	0.33591	25.2078			0.31274	-3.23956
0.33528	0.39924	0.3353	0.80398	0.33528	1.19744	0.33527	1.58231	0.33551	1.96224			0.48833	-0.50447	0.49738	-0.14275	0.49738	0.34889	0.49752	1.45683	0.49264	0.05622			0.33892	29.6484	0.33495	39.8788	0.33527	48.2804	0.33554	54.3488	0.33617	58.9812			0.34328	19.5944	0.33494	21.2084	0.33987	24.6882	0.33524	24.1322	0.34047	27.026			0.30815	-3.55779
0.3399	0.4054	0.33991	0.81697	0.3399	1.21824	0.33989	1.6072	0.34016	1.99155			0.48367	-0.54848	0.49262	-0.99158	0.49263	-1.21694	0.49297	-0.89057	0.48802	-1.26096			0.3435	31.4299	0.33957	41.3886	0.33985	49.8108	0.34013	56.0282	0.34075	60.8245			0.34785	20.7408	0.3396	22.7103	0.34448	26.3675	0.33988	25.8933	0.34511	28.8677			0.3035	-3.9521
0.34449	0.41074	0.34451	0.82806	0.34453	1.23495	0.34448	1.62969	0.34476	2.02012			0.47906	-0.58354	0.48804	-1.14717	0.48801	-1.61887	0.48834	-1.71817	0.48341	-1.98135			0.34812	33.2422	0.34416	43.0501	0.34449	51.4275	0.34471	57.7359	0.34537	62.6662			0.35247	21.8784	0.34418	24.2202	0.3491	28.0583	0.34446	27.6701	0.34965	30.7253			0.29891	-4.44252
0.34912	0.41614	0.34911	0.83981	0.34914	1.25381	0.3491	1.65563	0.34935	2.04999			0.47444	-0.6122	0.48339	-1.23486	0.48336	-1.80687	0.48369	-2.11914	0.47877	-2.43899			0.35273	35.006	0.34881	44.8716	0.34911	53.1522	0.34935	59.5039	0.34994	64.5368			0.35714	22.9921	0.3488	25.7375	0.35372	29.7623	0.34911	29.4669	0.35436	32.6064			0.29433	-5.04644
0.35374	0.4249	0.35377	0.85625	0.35376	1.27786	0.35376	1.68546	0.35399	2.08815			0.46982	-0.63799	0.47878	-1.29786	0.47876	-1.92391	0.47912	-2.36445	0.47415	-2.765			0.35741	36.6102	0.3534	46.841	0.35371	55.0014	0.35403	61.3497	0.35459	66.4595			0.36174	24.0405	0.35344	27.2597	0.35835	31.4759	0.35377	31.2767	0.35895	34.4998			0.28971	-5.8179
0.35839	0.43208	0.35839	0.86814	0.35839	1.29722	0.35837	1.71309	0.35866	2.12137			0.46518	-0.65663	0.47419	-1.34896	0.47415	-2.01613	0.47449	-2.53678	0.46955	-3.02036			0.362	37.8718	0.35804	48.9157	0.35836	56.9797	0.35862	63.2809	0.35924	68.4285			0.36631	24.9887	0.35805	28.7873	0.36293	33.1886	0.35836	33.1025	0.36356	36.3997			0.28507	-6.82299
0.36302	0.44239	0.36302	0.88524	0.36302	1.32142	0.36301	1.74322	0.36322	2.15981			0.46055	-0.67113	0.46954	-1.39377	0.46954	-2.09767	0.46981	-2.67496	0.46489	-3.21566			0.36664	38.6138	0.36265	51.0382	0.36297	59.0589	0.36323	65.2989	0.36384	70.4514			0.37097	25.7879	0.36268	30.3019	0.36757	34.8978	0.36299	34.9262	0.36824	38.3109			0.28045	-8.13359
0.36763	0.45461	0.36763	0.90686	0.36764	1.35123	0.36759	1.78072	0.36786	2.20418			0.4559	-0.68593	0.46493	-1.4295	0.4649	-2.15907	0.4652	-2.78298	0.46024	-3.37898			0.37121	38.6574	0.36728	53.1677	0.36761	61.2431	0.36788	67.4156	0.36845	72.555			0.37556	26.3609	0.36728	31.7998	0.37222	36.6073	0.36757	36.7585	0.37283	40.2204			0.27582	-9.70491
0.37225	0.46856	0.37224	0.92898	0.3722	1.38116	0.37224	1.82013	0.37247	2.2511			0.45139	-0.69386	0.46026	-1.45948	0.46031	-2.21094	0.46062	-2.87407	0.45569	-3.51695			0.37585	37.7963	0.3719	55.2356	0.37219	63.4975	0.37249	69.6266	0.37309	74.7311			0.38021	26.6811	0.37193	33.2747	0.37685	38.294	0.3722	38.59	0.37743	42.1341			0.27118	-11.4435
0.37686	0.48641	0.37682	0.95844	0.3769	1.42018	0.37685	1.86653	0.37709	2.30628			0.44671	-0.70731	0.45566	-1.48579	0.45571	-2.25899	0.45598	-2.9547	0.45109	-3.61724			0.38045	35.8574	0.37649	57.1476	0.37684	65.7812	0.37709	71.913	0.37768	76.986			0.38481	26.6947	0.37654	34.6948	0.38138	39.9717	0.37683	40.417	0.38205	44.0584			0.26655	-13.2613
0.38152	0.50529	0.38146	0.99223	0.38142	1.46609	0.38146	1.92539	0.38171	2.37494			0.44212	-0.71771	0.45106	-1.50389	0.45111	-2.29105	0.45138	-3.01251	0.44645	-3.72396			0.3851	32.3689	0.38114	58.8589	0.38141	68.0756	0.38172	74.2794	0.38226	79.3327			0.38945	26.3552	0.38111	36.0654	0.38604	41.6197	0.38141	42.25	0.38664	45.9773			0.26195	-15.0891
[truncated: 27 more rows]
[truncated: 10 more columns]

## Sheet: CD-Three Electrode System
CC-Co-MOF																				CC-CoNi-MOF@NH-1																				CC/CoNi-MOF@NH-2
[truncated: 1,085 more rows]
[truncated: 46 more columns]

## Sheet: EIS-Three Electrode System
CC		Fit			CC/Co-MOF		Fit			CC/CoNi-MOF@NH-1		Fit			CC/CoNi-MOF@NH-2		Fit			CC/CoNi-MOF@NH-3		Fit			CC/CoNi-MOF@NH-4		Fit					CC/CoNi-MOF@NH-2
[truncated: 45 more rows]

[truncated: 3 more sheets: CV-Two Electrode System, CD-Two Electrode System, EIS-Two Electrode System]
