# Supplementary material for: Template-directed in situ grown bimetallic nanoarchitectures with hydroxide active site enriched multi-charge transfer routes for energy storage
Source: Royal Society of Chemistry journal article supplement (doi:10.1039/d4ta03412k), 2024-01-01
Supplement: d4ta03412k2.pdf [file d4ta03412k2.pdf]

**Template-directed *in situ* grown bimetallic nanoarchitectures with hydroxide active sites enriched multi-charge transfer routes for energy storage**

Antonysamy Dennyson Savariraj<sup>a</sup>, Pugalenthayar Thondaiman<sup>b</sup>, Periyasamy Sivakumar<sup>a</sup>, Ramu Manikandan<sup>c</sup>, John D Rodney<sup>b</sup>, Byung Chul Kim<sup>b</sup>, Hyun Jung<sup>a\*</sup>.

<sup>a</sup> Advanced Functional Nanohybrid Material Laboratory, Department of Chemistry, Dongguk University Seoul-Campus, Jung-gu, Seoul 04620, Republic of Korea.

<sup>b</sup> Department of Advanced Components and Materials Engineering, Sunchon National University, 255, Jungang-ro, Suncheon-si, Jellanamdo 57922, Republic of Korea.

<sup>c</sup> Department of Energy and Materials Engineering, Dongguk University Seoul-Campus, Jung-gu, Seoul 04620, Republic of Korea.

---

\*Corresponding Author: chemphile@dongguk.edu (Hyun Jung)

---

## 1. Equations:

The areal capacity ( $C_a$ ) ( $mC\ cm^{-2}$ ) of the electrodes can be calculated from the GCD curves using the following equation:

$$C_a = \frac{I \times \Delta t}{a} \quad (S1)$$

Where  $I$  represents the discharge current (mA),  $\Delta t$  denotes discharge time (s) and  $a$  stands for the active area of the electrode ( $cm^2$ ).

The specific capacity ( $C_s$ ) ( $A\ g^{-1}$ ) of the electrodes using a three-electrode system can be determined from the GCD curves by applying the variables in the following equation.

$$C_s = \frac{I \times \Delta t}{m} \quad (S2)$$

Here,  $I$  denotes discharge current (mA),  $\Delta t$  stands for the discharge time (s) and  $m$  is the mass of the electrode (mg).

The specific capacitance ( $C_{sp}$ ) ( $F\ g^{-1}$ ) can be calculated using the following equation:

$$C_{sp} = \frac{I \times \Delta t}{\Delta V \times m} \quad (S3)$$

Where  $I$  is the discharge current (mA),  $\Delta t$  is the discharge time (s),  $\Delta V$  denotes the potential window (V) and  $m$  represents the mass of the active material on the electrode (mg).

The volumetric capacitance ( $C_{vc}$ ) ( $F\text{ cm}^{-3}$ ) of the electrodes can be determined using the following equation:.

$$C_{vc} = \frac{\textit{Specific capacitance}}{\textit{Density}} \quad (\text{S4})$$

$$i = av^b \quad (\text{S5})$$

$$\log i = \log a + b \log v \quad (\text{S6})$$

The equations S5 and S6  $i$  and  $v$  represent the current (A) and the scan rate ( $V\text{ s}^{-1}$ ) respectively, while  $a$  denotes the variable and  $b$  is the slope.

$$i(V) = K_1v + K_2v^{1/2} \quad (\text{S7})$$

In the above equation,  $i(V)$  represents the potential dependent current,  $K_1v$  is the surface capacitive contribution, and  $K_2v^{1/2}$  is the diffusion-controlled contribution. The equation S7 can be rewritten and represented as follows to get the values of  $K_1$  and  $K_2$ .

$$\frac{i(V)}{v^{1/2}} = K_1v^{1/2} + K_2 \quad (\text{S8})$$

The optimal mass ratio between positive and negative electrodes to assemble the hybrid asymmetric supercapacitor can be calculated using the following equation:.

$$\frac{m_+}{m_-} = \frac{C_- \times \Delta V_-}{C_+} \quad (\text{S9})$$

Where ' $m_+$ ' and ' $m_-$ ', denote the active mass of positive and negative electrodes while ' $C_+$ ' and ' $C_-$ ', stand for the specific capacity of positive and negative electrodes respectively, and the voltage window of negative electrodes is represented by ' $\Delta V_-$ '.

The energy ( $E_s$ ) and power ( $P_s$ ) densities are the quintessential parameters of an asymmetric device, and these parameters can be calculated using the following equations (S10 and S11).

$$E_s = \frac{I \times \int V(t)dt}{m \times 3.6} \quad (\text{S10})$$

$$P_s = \frac{E_s \times 3600}{t} \quad (\text{S11})$$

Here,  $E_s$  stands for specific energy (Wh kg<sup>-1</sup>),  $P_s$  represents the specific power (W kg<sup>-1</sup>), and

$\int V(t)dt$  denotes the integral area of the GCD curve.

2.Figures:

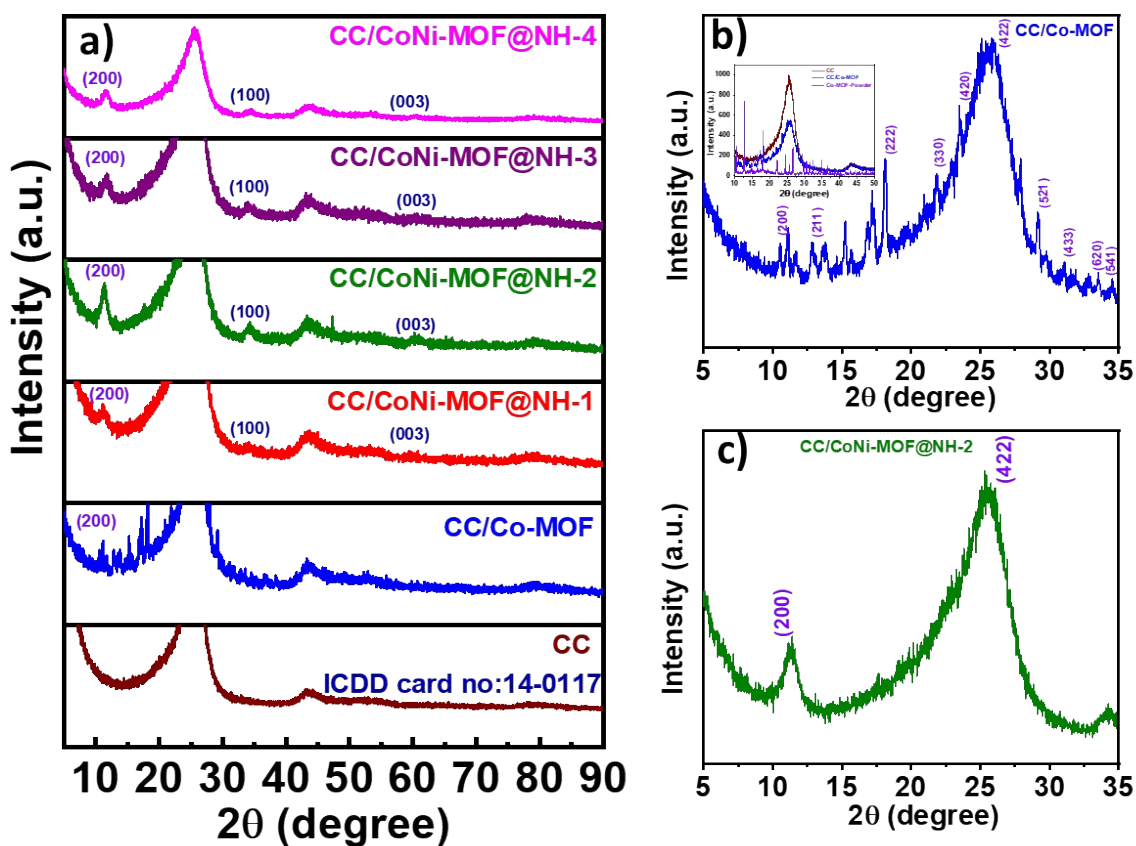

**Figure S1.** High magnification XRD patterns: (a) CC, CC/Co-MOF, CC/CoNi-MOF@NH-1, CC/CoNi-MOF@NH-2, CC/CoNi-MOF@NH-3, and CC/CoNi-MOF@NH-4 electrodes, (b) CC/Co-MOF electrode (inset shows the high magnification of CC, CC/Co-MOF electrode, and Co-MOF-powder sample), and (c) CC/CoNi-MOF@NH-2 electrode.

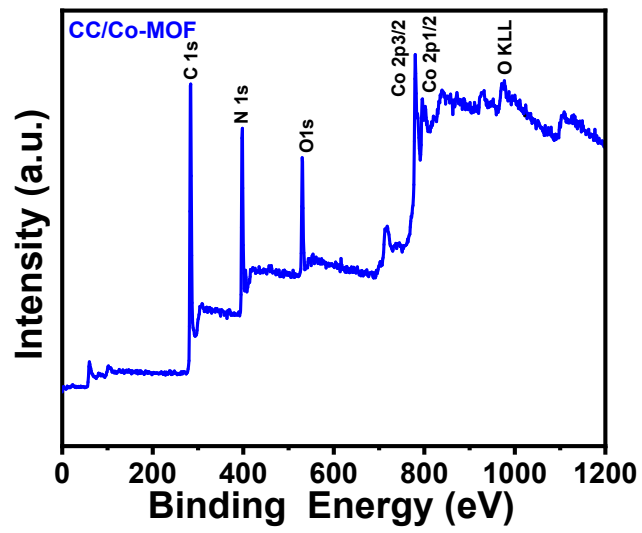

Figure S2. XPS survey spectra of the CC/Co-MOF electrode.

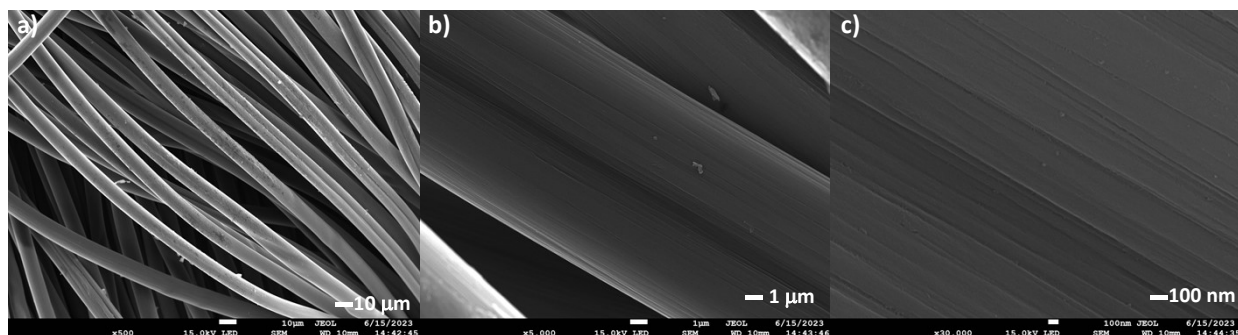

**Figure S3.** SEM images of bare carbon cloth (CC) at different magnifications.

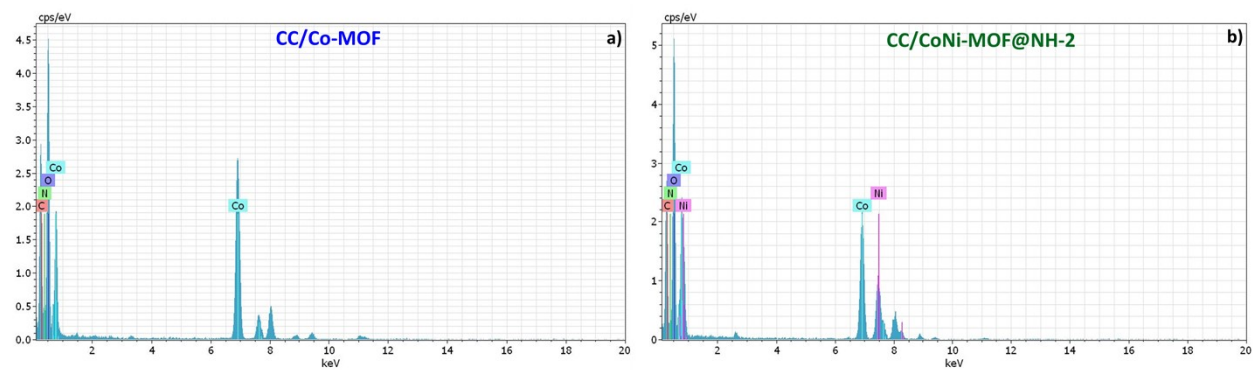

**Figure S4.** HRTEM energy-dispersive X-ray (EDX) spectrum of (a) CC/Co-MOF and (b) CC/CoNi-MOF@NH-2 electrodes.



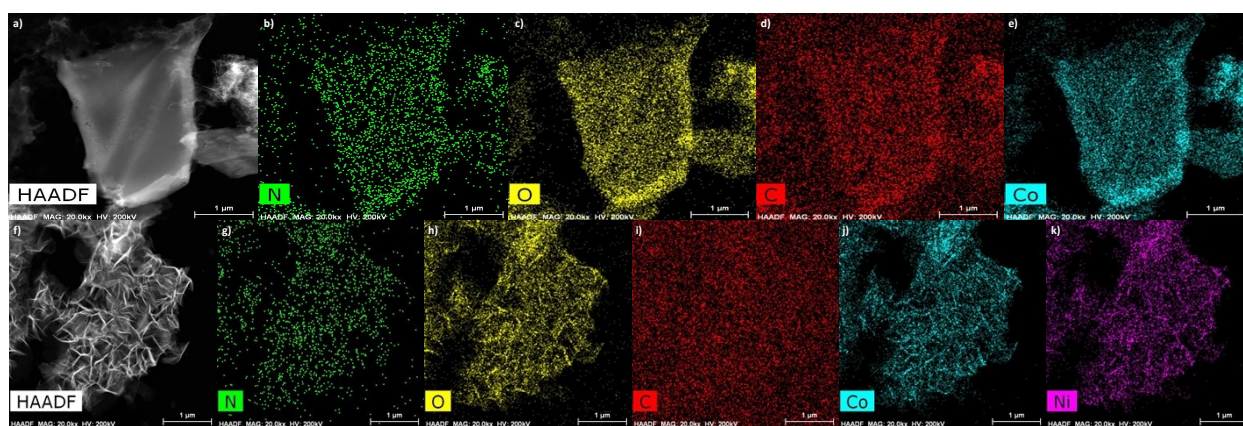

**Figure S5.** HRTEM EDX elemental mapping images of CC/Co-MOF: (a)-(e) and CC/CoNi-MOF@NH-2: (f)-(k) electrodes

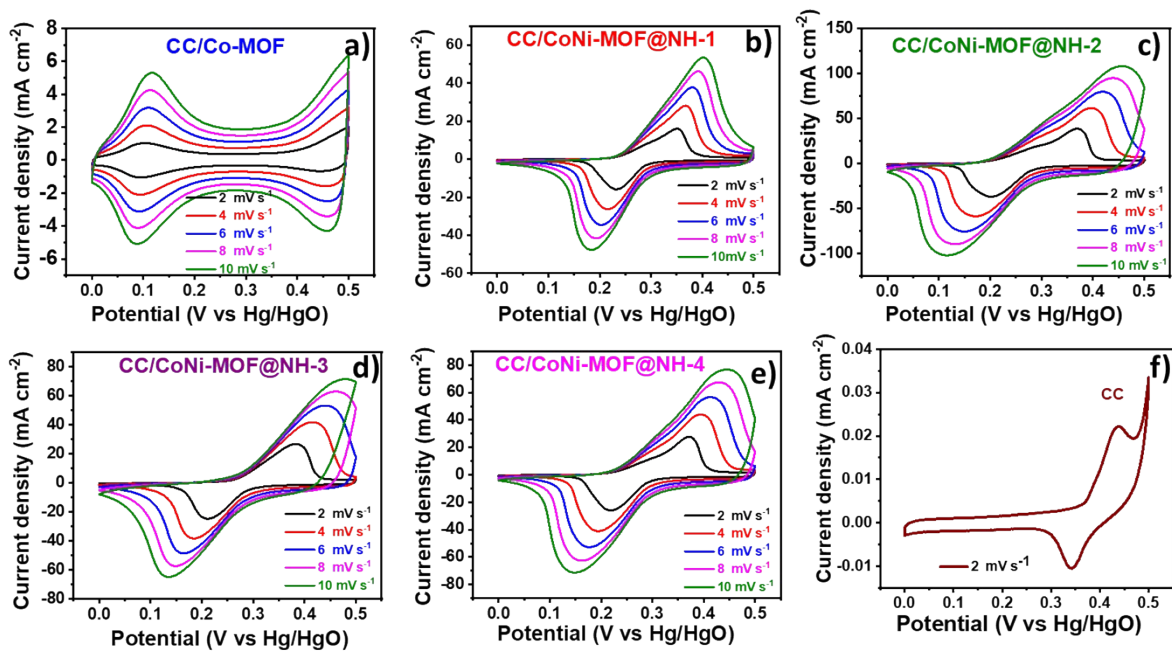

**Figure S6.** CVs measured at different scan rates for (a) CC/Co-MOF, (b) CC/CoNi-MOF@NH-1, (c) CC/CoNi-MOF@NH-2, (d) CC/CoNi-MOF@NH-3, and (e) CC/CoNi-MOF@NH-4 electrodes at different scan rates, and (f) CV of CC at a scan rate of  $2 \text{ mV s}^{-1}$ .

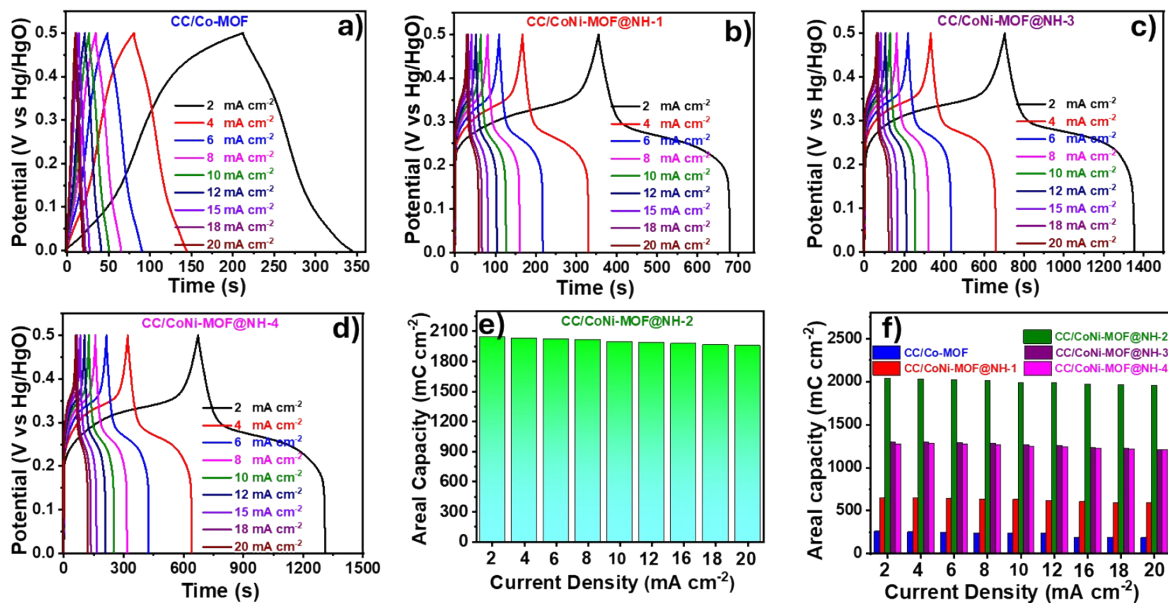

**Figure S7.** The GCD curves of (a) CC/Co-MOF, (b) CC/CoNi-MOF@NH-1, (c) CC/CoNi-MOF@NH-3, and (d) CC/CoNi-MOF@NH-4 electrodes at different current densities (2-20 mA cm<sup>-2</sup>), (e) The variation of areal capacitance ( $C_a$ ) values of CC/CoNi-MOF@NH-2 electrode at different current densities (2-20 mA cm<sup>-2</sup>), and (f) The variation of areal capacity ( $C_a$ ) values for CC/Co-MOF, CC/CoNi-MOF@NH-1, CC/CoNi-MOF@NH-2, CC/CoNi-MOF@NH-3, and CC/CoNi-MOF@NH-4 electrodes at different current densities (2-20 mA cm<sup>-2</sup>).

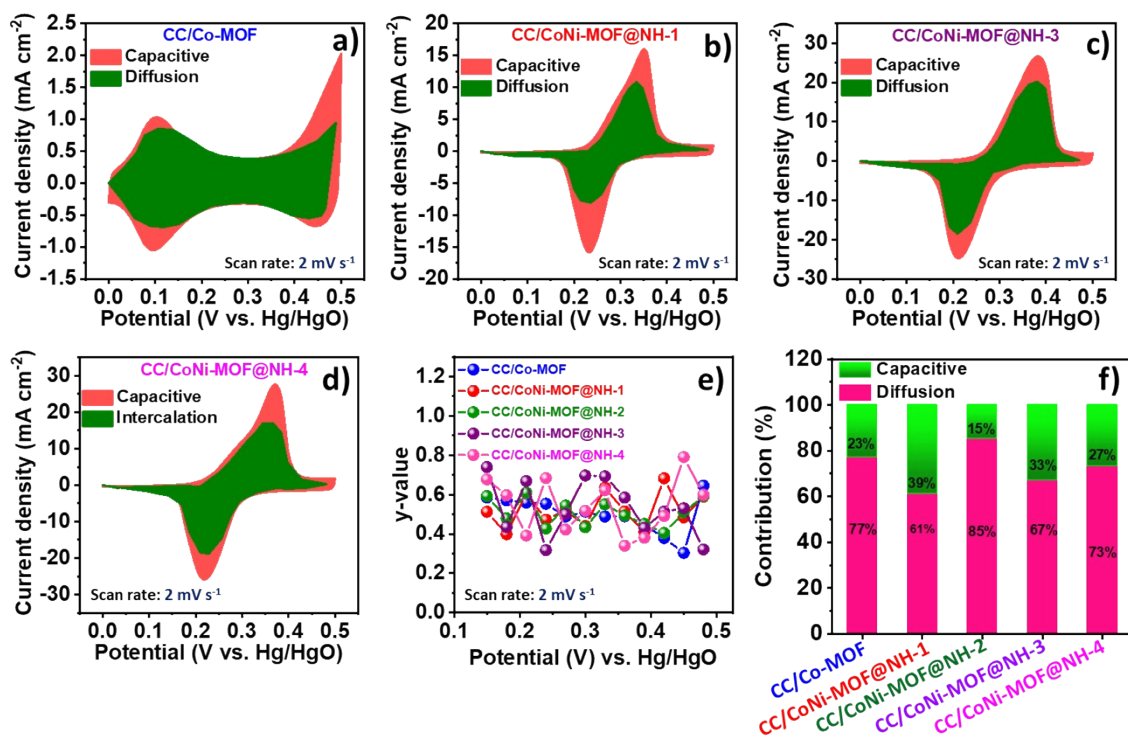

**Figure S8.** Capacitive and diffusion-controlled contribution fractions at the scan rate of 2 mV s<sup>-1</sup> for (a) CC/Co-MOF, (b) CC/CoNi-MOF@NH-1, (c) CC/CoNi-MOF@NH-3, and (d) CC/CoNi-MOF@NH-4 electrodes, (e) Plot between the Y-value vs potential (V) (vs Hg/HgO) and (f) Percentage of capacitive and diffusion-controlled contributions for CC/Co-MOF, CC/CoNi-MOF@NH-1, CC/CoNi-MOF@NH-2, CC/CoNi-MOF@NH-3, and CC/CoNi-MOF@NH-4 electrodes at a scan rate of 2 mV s<sup>-1</sup>.

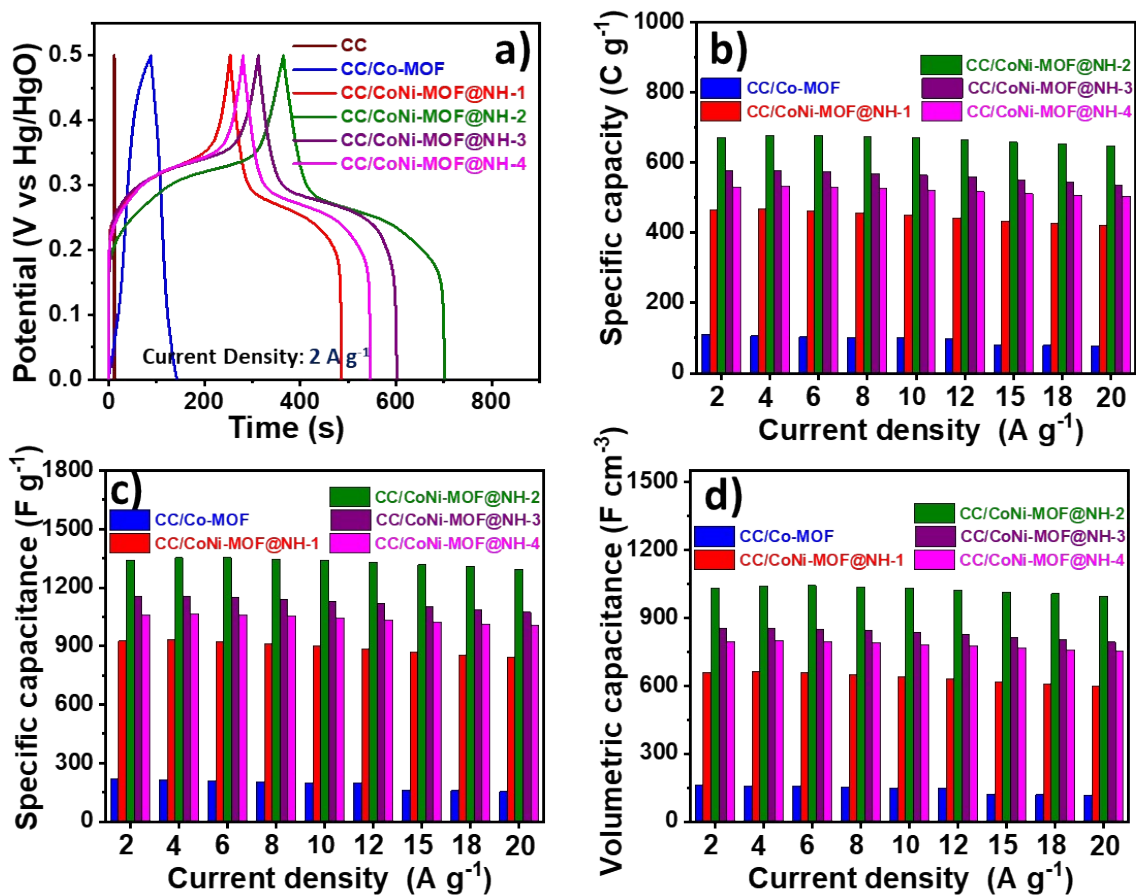

**Figure S9.** (a) Comparative GCD profiles of bare CC, CC/Co-MOF, CC/CoNi-MOF@NH-1, CC/CoNi-MOF@NH-2, CC/CoNi-MOF@NH-3, and CC/CoNi-MOF@NH-4 electrodes at a current density of 2 A g<sup>-1</sup>, the variation of (b) Specific capacity ( $C_s$ ), (c) Specific capacitance ( $C_{sp}$ ), and (d) Volumetric capacitance ( $C_{vc}$ ) values for CC/Co-MOF, CC/CoNi-MOF@NH-1, CC/CoNi-MOF@NH-2, CC/CoNi-MOF@NH-3, and CC/CoNi-MOF@NH-4 electrodes at different current densities (2-20 A g<sup>-1</sup>).

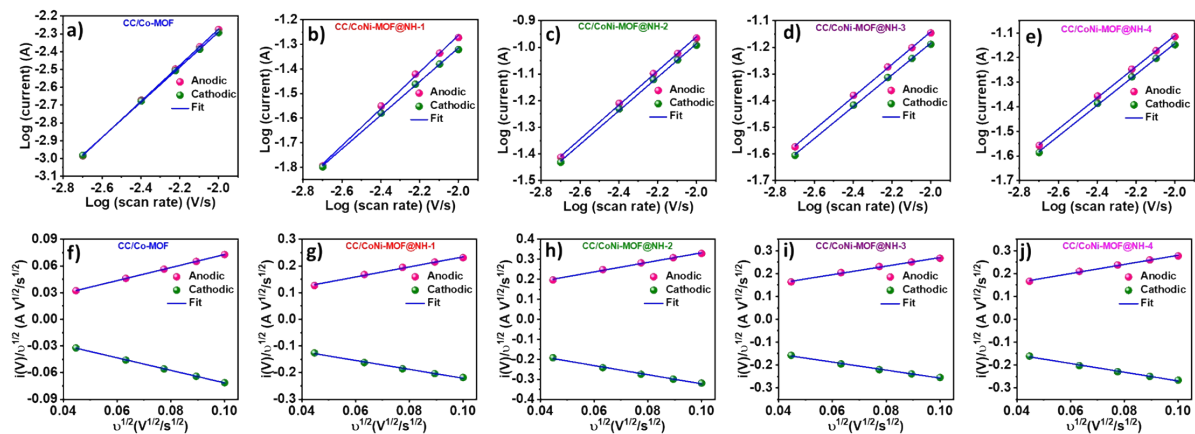

**Figure S10.** Logarithm profile of  $\log(i)$  versus  $\log(v)$  for anodic and cathodic peaks at different potentials for (a) CC/Co-MOF, (b) CC/CoNi-MOF@NH-1, (c) CC/CoNi-MOF@NH-2, (d) CC/CoNi-MOF@NH-3, and (e) CC/CoNi-MOF@NH-4 electrodes and the graph between  $i(V)/v^{1/2}$  and  $v^{1/2}$  for (f) CC/Co-MOF, (g) CC/CoNi-MOF@NH-1, (h) CC/CoNi-MOF@NH-2, (i) CC/CoNi-MOF@NH-3, and (j) CC/CoNi-MOF@NH-4 electrodes.

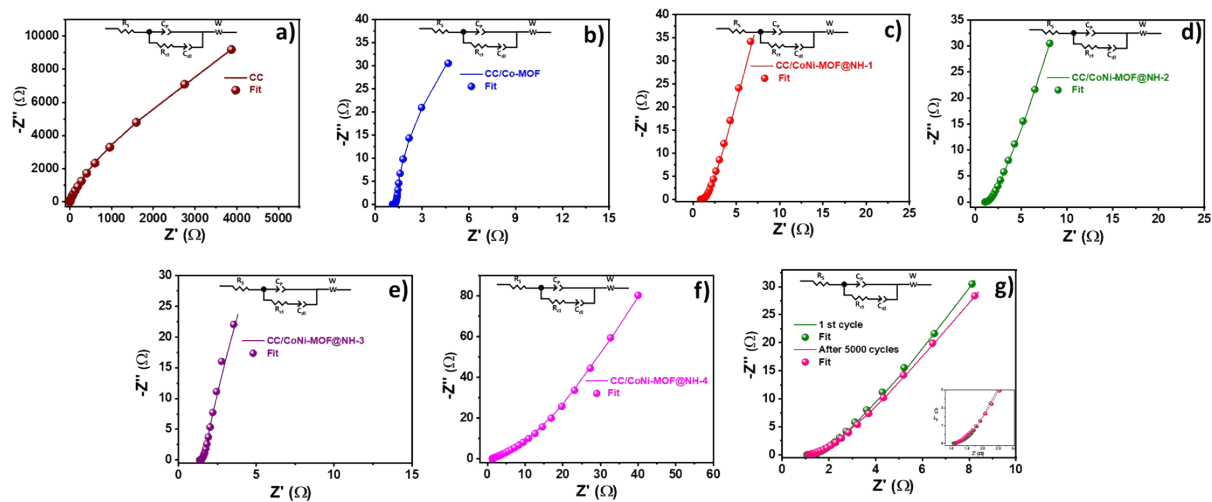

**Figure S11.** Nyquist plots fitted with equivalent circuits for (a) Bare CC, (b) CC/Co-MOF, (c) CC/CoNi-MOF@NH-1, (d) CC/CoNi-MOF@NH-2, (e) CC/CoNi-MOF@NH-3, (f) CC/CoNi-MOF@NH-4, electrodes and (g) CC/CoNi-MOF@NH-2 electrode before and after 5000 charge/discharge cycles, with the insets showing the respective magnified view.



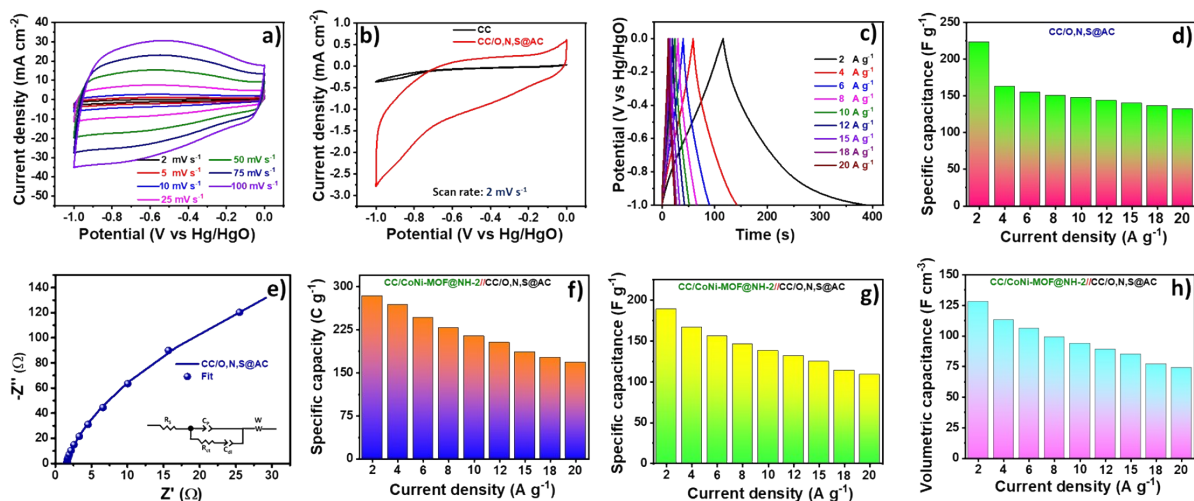

**Figure S12.** (a) CV curves of the negative electrode (CC/O,N,S@AC) at different scan rates ( $2\text{-}100\text{ mV s}^{-1}$ ), (b) Comparison of CV curves of the negative electrode (CC/O,N,S@AC) and bare CC at a scan rate of  $2\text{ mV s}^{-1}$  (c) GCD curves for CC/O,N,S@AC electrode at different current densities ( $2\text{-}20\text{ A g}^{-1}$ ), (d) Comparison of specific capacitance ( $C_s$ ) obtained from the GCDs of CC/O, N, S@AC electrode at different current densities ( $2\text{-}20\text{ A g}^{-1}$ ), (e) Nyquist plot of CC/O, N, S@AC electrode and the inset shows the equivalent circuit, The variation of (f) Specific capacity ( $C_s$ ), (g) Specific capacitance ( $C_{sp}$ ), and (h) Volumetric capacitance ( $C_{vc}$ ) values for the HSC (CC/CoNi-MOF@NH-2//CC/O, N, S@AC) at different current densities ( $2\text{-}20\text{ A g}^{-1}$ ).



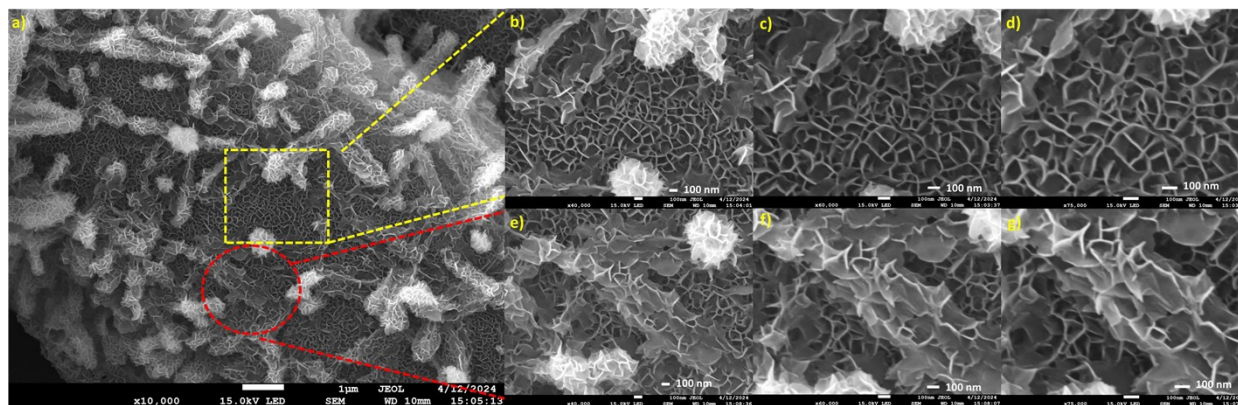

**Figure S13.** Post-mortem SEM analysis of CC/CoNi-MOF@NH-2 electrode after 10,000 continuous charge/discharge cycles at different places with various magnifications.
